# Supplementary material for: Copper-catalyzed ortho-alkenylation of quinoline N-oxides with alkynes
Source: Royal Society of Chemistry journal article supplement (doi:10.1039/d1qo01800k), 2022-01-01

**Supporting Information for**  
**Copper-Catalyzed *ortho*-Alkenylation of Quinoline *N*-Oxides with Alkynes**

Linjuan Jiang<sup>a</sup>, Hui Hu<sup>b</sup>, Yuanhong Liu<sup>\*b</sup>

<sup>a</sup>Key Laboratory for Advanced Materials and Joint International Research Laboratory of Precision Chemistry and Molecular Engineering, Feringa Nobel Prize Scientist Joint Research Center, Frontiers Science Center for Materiobiology and Dynamic Chemistry, School of Chemistry and Molecular Engineering, East China University of Science and Technology, Shanghai 200237, China. <sup>b</sup> Department of Chemistry, Zhengzhou University, 100 Science Avenue, Zhengzhou, Henan Province, 450001, People's Republic of China. <sup>b</sup>State Key Laboratory of Organometallic Chemistry, Center for Excellence in Molecular Synthesis, Shanghai Institute of Organic Chemistry, University of Chinese Academy of Sciences, Chinese Academy of Sciences, 345 Lingling Lu, Shanghai 200032, People's Republic of China. Fax: (+86) 021-64166128, E-mail: [yhliu@sioc.ac.cn](mailto:yhliu@sioc.ac.cn)

| <b>Contents:</b>                                                 | <b>Page</b> |
|------------------------------------------------------------------|-------------|
| General methods                                                  | S1          |
| Synthesis and characterization of <b>2a-d</b>                    | S3          |
| Synthesis and characterization of enynes <b>4l</b> and <b>4n</b> | S4          |
| Optimization studies                                             | S5          |
| Synthesis and characterization of products <b>3</b> and <b>5</b> | S8          |
| 1 mmol scale reaction for the formation of <b>5a</b>             | S30         |
| Mechanistic studies                                              | S31         |
| References                                                       | S34         |
| X-ray crystal structures of compounds <i>E-3b</i> and <b>5m</b>  | S35         |
| NMR spectra of all new compounds                                 | S39         |

### **General Methods**

Unless noted, all reactions were carried out using standard Schlenk technique under an argon atmosphere or using a dry vial with a dry box technique under a nitrogen atmosphere. THF was distilled from sodium and benzophenone or purified using Innovative Technology Solvent Purifier (for the synthesis of substrates). *n*-BuLi (2.5 M solution in Hexane) was

purchased from Adamas Chemical Company, CuCl was purchased from Acros Company, PCy<sub>3</sub>, prop-1-yn-1-ylbenzene and bis(pinacolato)diboron were purchased from J&K Chemical Company, KO<sup>t</sup>Bu and quinoline *N*-oxide were purchased from TCI Chemical Company.

<sup>1</sup>H and <sup>13</sup>C NMR spectra were recorded at room temperature in CDCl<sub>3</sub> (containing 0.03% TMS), or in C<sub>6</sub>D<sub>6</sub> (containing 0.03% TMS) solution on Varian or Agilent XL-400 MHz spectrometer or Agilent XL-500 MHz spectrometer. <sup>1</sup>H NMR spectra was recorded with tetramethylsilane (0.00 ppm) or solvent residual peak (CDCl<sub>3</sub>: 7.26 ppm) as internal reference; <sup>13</sup>C NMR spectra was recorded with CDCl<sub>3</sub> (77.00 ppm) as internal reference. <sup>11</sup>B-NMR was recorded in CDCl<sub>3</sub> (containing 0.03% TMS) on Bruker-400 MHz spectrometer. High-resolution mass spectra were obtained by using JEOL AccuTOF 4G LC-plus, Agilent Technologies 7250 GCQTOF spectrometer. IR spectra were obtained by using a Nicolet iS10 spectrometer. Single crystal X-ray diffraction data was collected on Bruker SMART diffractometer at 293 (2) K for **E-3b** and **5m**.

The substrate of aryl(alkyl) alkyne **1d** is commercially available. Substrates **1a-1c** and **1e-1k** were prepared according to the literature procedure,<sup>1</sup> and the spectroscopic data of these compounds are in agreement with that previously reported.

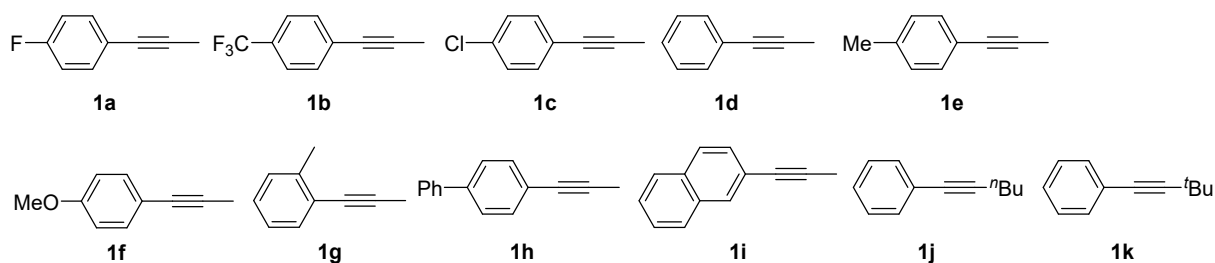

Quinoline *N*-oxide **2a** and **2g** are commercially available. *N*-oxides **2b-2f**, **2h** and **2a-d** were prepared according to the literature procedures,<sup>2</sup> and the spectroscopic data of these compounds are in agreement with that previously reported.



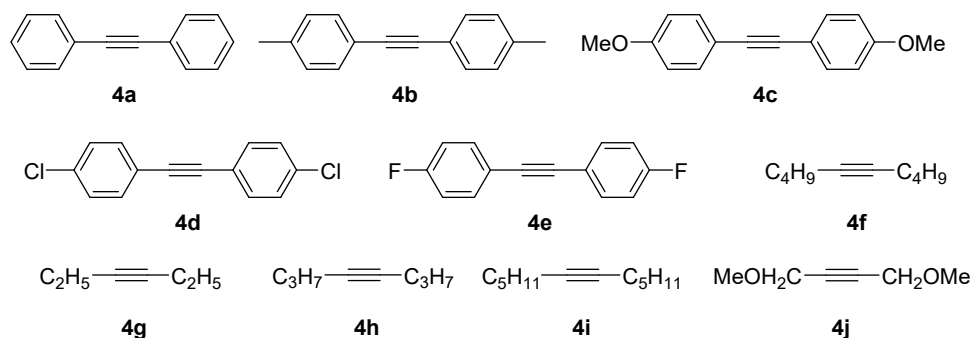

Enynes were prepared according to the literature procedures,<sup>5</sup> and the spectroscopic data of these compounds are in agreement with that previously reported.

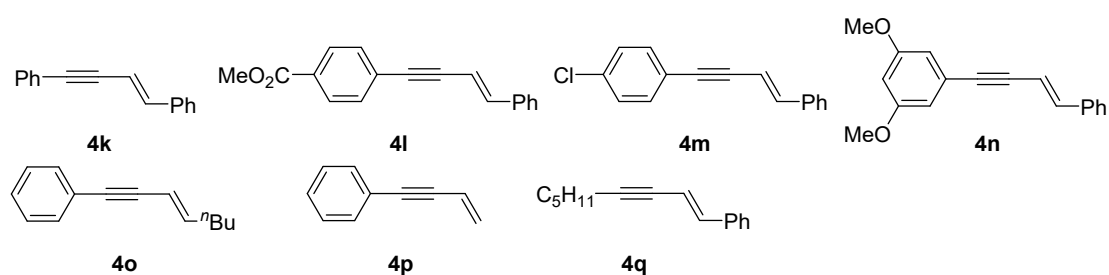

Terminal alkynes:

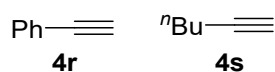

For the synthesis and characterization of new enynes, see following:

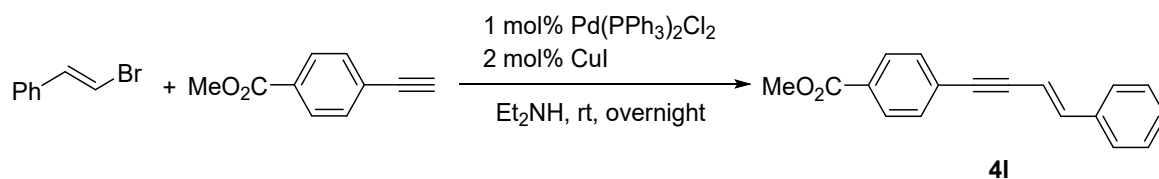

**Methyl (*E*)-4-(4-phenylbut-3-en-1-yn-1-yl)benzoate (4l).** To a 100 mL Schlenk tube were added PdCl<sub>2</sub>(PPh<sub>3</sub>)<sub>2</sub> (28.0 mg, 0.04 mmol), CuI (15.2 mg, 0.08 mmol), methyl 4-ethynylbenzoate (817.0 mg, 5.1 mmol), Et<sub>2</sub>NH (20 mL) and (*E*)-(2-bromovinyl)benzene (0.5 mL, 3.9 mmol) under argon. The reaction was stirred overnight at ambient temperature until the reaction was completed as monitored by TLC. The mixture was quenched with H<sub>2</sub>O and extracted with ethyl acetate. The combined organic layers were washed with brine and dried over anhydrous Na<sub>2</sub>SO<sub>4</sub>. The mixture was concentrated and the solvent was evaporated under the reduced pressure. The residue was purified by column chromatography on silica gel (eluent: petroleum ether/ethyl acetate = 100:1 to 50:1) to afford **4l** in 86% yield (883.6 mg) as a white

solid.  $^1\text{H}$  NMR (400 MHz,  $\text{CDCl}_3$ ):  $\delta$  8.0 (d,  $J = 8.0$  Hz, 2H), 7.52 (d,  $J = 8.4$  Hz, 2H), 7.43 (d,  $J = 7.2$  Hz, 2H), 7.37-7.30 (m, 3H), 7.08 (d,  $J = 16.4$  Hz, 1H), 6.38 (d,  $J = 16.4$  Hz, 1H), 3.91 (s, 3H).  $^{13}\text{C}$  NMR (100 MHz,  $\text{CDCl}_3$ ):  $\delta$  166.5, 142.3, 136.0, 131.3, 129.5, 129.3, 128.9, 128.8, 128.1, 126.4, 107.6, 91.9, 90.9, 52.2. IR (neat): 2948, 2191, 1706, 1596, 1436, 1405, 1308, 1276, 1192, 1174, 1107, 1014, 954, 855, 828, 768, 754, 695. HRMS (ESI-TOF)  $m/z$ :  $[\text{M}]^+$  Calcd for  $\text{C}_{18}\text{H}_{14}\text{O}_2$  262.0988; Found 262.0996.

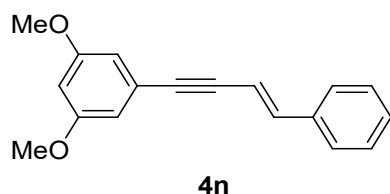

**(E)-1,3-Dimethoxy-5-(4-phenylbut-3-en-1-yn-1-yl)benzene (4n).** To a 100 mL Schlenk tube were added  $\text{PdCl}_2(\text{PPh}_3)_2$  (175.5 mg, 0.25 mmol),  $\text{CuI}$  (95.2 mg, 0.5 mmol),  $\text{Et}_2\text{NH}$  (20 mL), 1-ethynyl-3,5-dimethoxybenzene (811.0 mg, 5 mmol) and (*E*)-(2-bromovinyl)benzene (915.3 mg, 5 mmol) under argon. The reaction was stirred overnight at ambient temperature until the reaction was completed as monitored by TLC. The reaction mixture was filtered through a pad of silica gel. Then the solvent was evaporated under the reduced pressure and the residue was purified by column chromatography on silica gel (eluent: petroleum ether/ethyl acetate = 30/1) to afford **4n** in 83% yield (1.1 g) as a yellow oil.  $^1\text{H}$  NMR (400 MHz,  $\text{CDCl}_3$ ):  $\delta$  7.42 (d,  $J = 8.0$  Hz, 2H), 7.36-7.27 (m, 3H), 7.05 (d,  $J = 16.4$  Hz, 1H), 6.65 (s, 2H), 6.46 (d,  $J = 2.0$  Hz, 1H), 6.38 (d,  $J = 16.0$  Hz, 1H), 3.78 (s, 6H).  $^{13}\text{C}$  NMR (100 MHz,  $\text{CDCl}_3$ ):  $\delta$  160.5, 141.5, 136.2, 128.7, 128.6, 126.3, 124.6, 109.2, 107.9, 101.7, 91.7, 88.4, 55.3. IR (neat): 2990, 2936, 2834, 1612, 1583, 1449, 1418, 1358, 1298, 1273, 1202, 1151, 1064, 1034, 951, 925, 833, 749, 690, 680. HRMS (ESI-TOF)  $m/z$ :  $[\text{M}]^+$  Calcd for  $\text{C}_{18}\text{H}_{16}\text{O}_2$  264.1145; Found 264.1152.

### General procedure for optimization studies:

The reaction was conducted in an oven-dried screw-cap vial (volume: 4 mL) equipped with a magnetic stir bar. In a nitrogen-filled glove box, Cu catalyst (0.02 mmol), ligand (0.02 mmol),  $\text{B}_2\text{pin}_2$  (0.3 mmol), base (0.3 mmol) and solvent (1 mL) were added sequentially to a screw-cap vial. The solvent stirred at ambient temperature for 1 minute. Then **1a** (0.2 mmol, 26.8 mg) and **2a** (1.5 equiv., 43.5 mg) were added. The vial was sealed with a screw cap featuring a PTFE/silicone septum and taken outside the glove box. After the reaction mixture was stirred in an oil bath preheated at 80 °C (oil bath) for 24 h. The mixture was cooled down

to room temperature, filtered through a pad of silica gel and washed with ethyl acetate. The solvent was evaporated under the reduced pressure and the yields were determined by  $^1\text{H}$  NMR using 1,3,5-trimethylbenzene (1.0 equiv., 24.0 mg) in  $\text{C}_6\text{D}_6$  as the internal standard.

**Table S1.** Optimization studies.

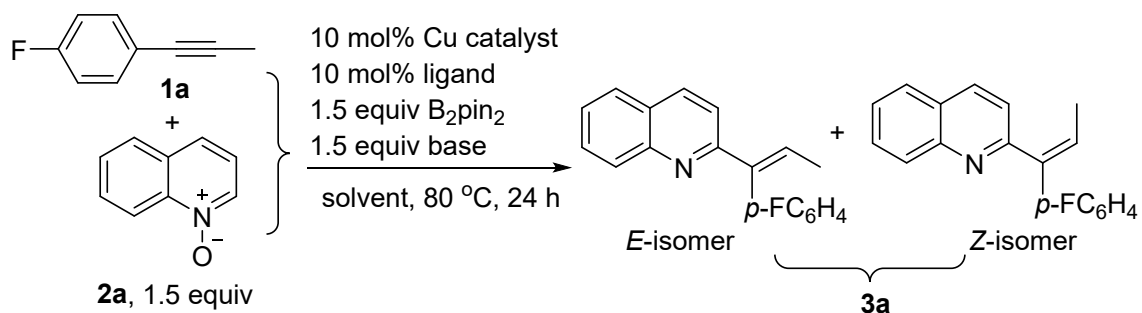

| entry    | Cu catalyst                                                           | ligand                                           | base                            | solvent     | yield of <b>3a</b> (%) <sup>a</sup> | <i>E</i> : <i>Z</i> <sup>b</sup> |
|----------|-----------------------------------------------------------------------|--------------------------------------------------|---------------------------------|-------------|-------------------------------------|----------------------------------|
| 1        | CuCl                                                                  | PPh <sub>3</sub>                                 | KO <sup>t</sup> Bu              | THF         | 45                                  | 5.1:1                            |
| 2        | CuCl                                                                  | P <sup>n</sup> Bu <sub>3</sub>                   | KO <sup>t</sup> Bu              | THF         | 85                                  | 6.5:1                            |
| <b>3</b> | <b>CuCl</b>                                                           | <b>PCy<sub>3</sub></b>                           | <b>KO<sup>t</sup>Bu</b>         | <b>THF</b>  | <b>99<sup>c</sup></b>               | <b>7.3:1</b>                     |
| 4        | CuCl                                                                  | PPhCy <sub>2</sub>                               | KO <sup>t</sup> Bu              | THF         | 95                                  | 7.5:1                            |
| 5        | CuCl                                                                  | P <sup>t</sup> Bu <sub>3</sub> ·HBF <sub>4</sub> | KO <sup>t</sup> Bu              | THF         | 80                                  | 4.9:1                            |
| 6        | CuCl                                                                  | dppb                                             | KO <sup>t</sup> Bu              | THF         | 77                                  | 6.4:1                            |
| 7        | CuCl                                                                  | dcype                                            | KO <sup>t</sup> Bu              | THF         | 79                                  | 5.8:1                            |
| 8        | CuCl                                                                  | IMes                                             | KO <sup>t</sup> Bu              | THF         | 54                                  | 5.2:1                            |
| 9        | CuCl                                                                  | IPr                                              | KO <sup>t</sup> Bu              | THF         | trace                               | -                                |
| 10       | CuBr                                                                  | PCy <sub>3</sub>                                 | KO <sup>t</sup> Bu              | THF         | 98 <sup>c</sup>                     | 6.2:1                            |
| 11       | Cu(OAc) <sub>2</sub>                                                  | PCy <sub>3</sub>                                 | KO <sup>t</sup> Bu              | THF         | 89                                  | 7.5:1                            |
| 12       | Cu(OTf) <sub>2</sub>                                                  | PCy <sub>3</sub>                                 | KO <sup>t</sup> Bu              | THF         | ca. 94                              | 6.6:1                            |
| 13       | [Cu(MeCN) <sub>4</sub> ] <sup>+</sup> [PF <sub>6</sub> ] <sup>-</sup> | PCy <sub>3</sub>                                 | KO <sup>t</sup> Bu              | THF         | 97 <sup>c</sup>                     | 6.6:1                            |
| 14       | CuCl                                                                  | PCy <sub>3</sub>                                 | NaO <sup>t</sup> Bu             | THF         | 87                                  | 4.2:1                            |
| 15       | CuCl                                                                  | PCy <sub>3</sub>                                 | LiO <sup>t</sup> Bu             | THF         | 22                                  | 4.8:1                            |
| 16       | CuCl                                                                  | PCy <sub>3</sub>                                 | Na <sub>2</sub> CO <sub>3</sub> | THF         | trace                               | -                                |
| 17       | CuCl                                                                  | PCy <sub>3</sub>                                 | NaHCO <sub>3</sub>              | THF         | trace                               | -                                |
| 18       | CuCl                                                                  | PCy <sub>3</sub>                                 | KO <sup>t</sup> Bu              | 1,4-dioxane | 71                                  | 16.4:1                           |
| 19       | CuCl                                                                  | PCy <sub>3</sub>                                 | KO <sup>t</sup> Bu              | toluene     | 64                                  | 8.6:1                            |
| 20       | CuCl                                                                  | PCy <sub>3</sub>                                 | KO <sup>t</sup> Bu              | DMF         | 46                                  | 2.4:1                            |
| 21       | -                                                                     | PCy <sub>3</sub>                                 | KO <sup>t</sup> Bu              | THF         | -                                   | -                                |
| 22       | CuCl                                                                  | -                                                | KO <sup>t</sup> Bu              | THF         | -                                   | -                                |
| 23       | CuCl                                                                  | PCy <sub>3</sub>                                 | -                               | THF         | -                                   | -                                |

<sup>a</sup>NMR yields using 1,3,5-trimethylbenzene as an internal standard. <sup>b</sup>The ratio was determined by <sup>19</sup>F NMR spectra. <sup>c</sup>Deduced from the NMR yield of the major isomer and the *E/Z* ratio of **3a**.

**For the characterization of Z-3a (due to the low yield of Z-3a, the pure Z-3a was obtained by isolation of the combined samples of several experiments):** A colorless oil. <sup>1</sup>H NMR (400 MHz, CDCl<sub>3</sub>): δ 8.16 (t, *J* = 8.4 Hz, 2H), 7.83 (d, *J* = 8.0 Hz, 1H), 7.73 (td, *J* = 7.2, 1.6 Hz, 1H), 7.55 (t, *J* = 7.4 Hz, 1H), 7.27-7.21 (m, 3H), 6.95 (td, *J* = 8.0, 1.6 Hz, 2H), 6.35 (q, *J* = 6.6 Hz, 1H), 1.84 (d, *J* = 7.2 Hz, 3H). <sup>13</sup>C NMR (100 MHz, CDCl<sub>3</sub>): δ 162.0 (d, <sup>1</sup>*J*<sub>C-F</sub> = 244.9 Hz), 159.1, 147.9, 141.1, 137.4 (d, <sup>4</sup>*J*<sub>C-F</sub> = 3.2 Hz), 136.2, 129.5, 128.7, 128.6, 127.5, 127.4, 126.8, 126.5, 123.0, 115.0 (d, <sup>2</sup>*J*<sub>C-F</sub> = 21.3 Hz), 15.5. <sup>19</sup>F NMR (376 MHz, CDCl<sub>3</sub>): δ -115.71--115.73 (m). IR (neat): 3040, 2913, 2851, 1617, 1597, 1557, 1506, 1424, 1222, 1158, 1014, 924, 823, 755, 720 cm<sup>-1</sup>. HRMS (ESI-TOF) *m/z*: [M+H]<sup>+</sup> Calcd for C<sub>18</sub>H<sub>15</sub>NF 264.1183; Found 264.1189.

### Synthesis of products 3.

#### Typical procedure for the synthesis of 3a.

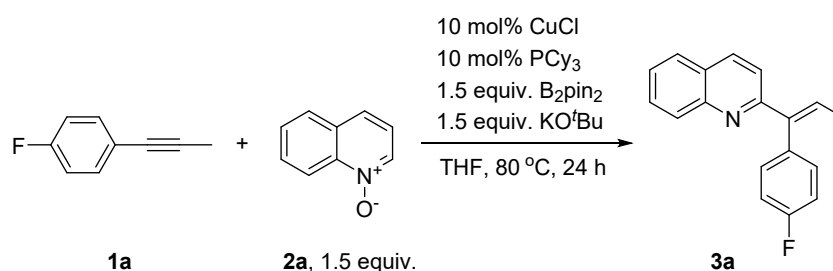

**(E)-2-(1-(4-Fluorophenyl)prop-1-en-1-yl)quinoline (3a).** In the nitrogen-filled glove box, CuCl (10 mol%, 3.0 mg), PCy<sub>3</sub> (10 mol%, 8.4 mg), B<sub>2</sub>pin<sub>2</sub> (1.5 equiv., 114.3 mg), KO<sup>t</sup>Bu (1.5 equiv., 50.5 mg) and THF (1.5 mL) were added to screw-cap vial (4 mL). The mixture was stirred at room temperature for 1 minute. Then **1a** (0.3 mmol, 40.2 mg) and **2a** (1.5 equiv., 65.3 mg) were added. The vial was sealed with a screw cap featuring a PTFE/silicone septum and taken outside the glove box. After the reaction mixture was stirred in an oil bath preheated at 80 °C (oil bath) for 24 h, the mixture was filtered over a silica gel pad and washed with ethyl acetate. The solvent was evaporated under the reduced pressure. the residue was purified by column chromatography on silica gel (eluent: petroleum ether/ethyl acetate = 30/1) to afford the product **3a** in 77% yield (60.7 mg) as a colorless oil. <sup>1</sup>H NMR (400 MHz, CDCl<sub>3</sub>): δ 8.09 (d, *J* = 8.4 Hz, 1H), 7.95 (d, *J* = 8.8 Hz, 1H), 7.72 (d, *J* = 8.4 Hz, 1H), 7.67 (td, *J* = 7.8, 1.2 Hz, 1H), 7.46 (td, *J* = 7.4, 1.2 Hz, 1H), 7.25-7.21 (m, 2H), 7.13-7.06 (m, 4H), 1.85 (d, *J* = 7.2 Hz, 3H). <sup>13</sup>C NMR (100 MHz, CDCl<sub>3</sub>): δ 162.0 (d, <sup>1</sup>*J*<sub>C-F</sub> = 244.5 Hz), 158.8, 147.8, 141.1, 135.9, 134.4 (d, <sup>4</sup>*J*<sub>C-F</sub> = 3.7 Hz), 131.7 (d, <sup>4</sup>*J*<sub>C-F</sub> = 7.7 Hz), 130.3, 129.5, 129.4, 127.3, 127.0, 125.9, 120.5, 115.3 (d, <sup>2</sup>*J*<sub>C-F</sub> = 21.0 Hz), 15.7. <sup>19</sup>F NMR (376 MHz, CDCl<sub>3</sub>): δ -115.04--115.08 (m).



IR (neat): 3039, 2911, 2853, 1615, 1594, 1556, 1507, 1425, 1359, 1220, 1172, 1157, 1142, 1015, 908, 796, 785, 755, 728, 696  $\text{cm}^{-1}$ . HRMS (ESI-TOF)  $m/z$ :  $[M+H]^+$  Calcd for  $\text{C}_{18}\text{H}_{15}\text{NF}$  264.1183; Found 264.1181.

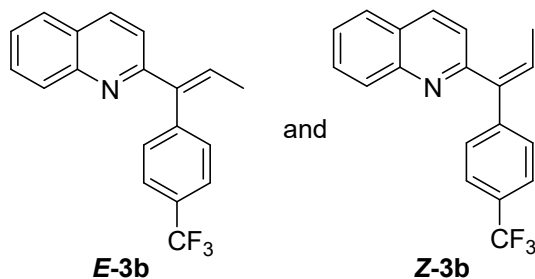

**(E)-2-(1-(4-(Trifluoromethyl)phenyl)prop-1-en-1-yl)quinoline (E-3b).** CuCl (10 mol%, 3.0 mg),  $\text{PCy}_3$  (10 mol%, 8.4 mg),  $\text{B}_2\text{pin}_2$  (1.5 equiv., 114.3 mg), KO<sup>t</sup>Bu (1.5 equiv., 50.5 mg) and THF (1.5 mL), **1b** (0.3 mmol, 55.2 mg) and **2a** (1.5 equiv., 65.3 mg) were stirred at 80 °C in an oil bath for 24 h. Purification by column chromatography on silica gel (eluent: petroleum ether/ethyl acetate = 30/1) to afford the title product **E-3b** in 49% yield (45.9 mg) followed by **Z-3b** in 17% yield (16.1 mg). **For the characterization of E-3b:** A yellow solid.  $^1\text{H}$  NMR (400 MHz,  $\text{CDCl}_3$ ):  $\delta$  8.09 (d,  $J = 8.8$  Hz, 1H), 7.94 (d,  $J = 8.8$  Hz, 1H), 7.72-7.64 (m, 4H), 7.45 (t,  $J = 7.6$  Hz, 1H), 7.38 (d,  $J = 7.6$  Hz, 2H), 7.12 (q,  $J = 7.2$  Hz, 1H), 7.02 (d,  $J = 8.4$  Hz, 1H), 1.84 (d,  $J = 7.2$  Hz, 3H).  $^{13}\text{C}$  NMR (100 MHz,  $\text{CDCl}_3$ ):  $\delta$  158.1, 147.8, 142.4 (d,  $^4J_{\text{C-F}} = 1.6$  Hz) 141.0, 136.1, 131.0 (d,  $^4J_{\text{C-F}} = 1.6$  Hz), 130.5, 129.6, 129.4, 129.3 (q,  $^2J_{\text{C-F}} = 32.3$  Hz), 127.3, 127.0, 126.1, 125.3 (d,  $^4J_{\text{C-F}} = 3.7$  Hz), 124.2 (q,  $^1J_{\text{C-F}} = 270.8$  Hz), 120.2, 15.6.  $^{19}\text{F}$  NMR (376 MHz,  $\text{CDCl}_3$ ): -62.39 (s). IR (neat): 2920, 2850, 1615, 1593, 1503, 1406, 1323, 1260, 1164, 1143, 1062, 1019, 849, 818, 774, 756, 698  $\text{cm}^{-1}$ . HRMS (ESI-TOF)  $m/z$ :  $[M+H]^+$  Calcd for  $\text{C}_{19}\text{H}_{15}\text{NF}_3$  314.1151; Found 314.1145.

**For the characterization of (Z-3b):** A light yellow oil.  $^1\text{H}$  NMR (400 MHz,  $\text{CDCl}_3$ ):  $\delta$  8.17 (t,  $J = 8.0$  Hz, 2H), 7.86 (d,  $J = 8.0$  Hz, 1H), 7.75 (td,  $J = 7.8, 1.2$  Hz, 1H), 7.58 (t,  $J = 7.2$  Hz, 1H), 7.52 (d,  $J = 8.4$  Hz, 2H), 7.37 (d,  $J = 8.4$  Hz, 2H), 7.27 (d,  $J = 8.0$  Hz, 1H), 6.50 (q,  $J = 7.2$  Hz, 1H), 1.89 (d,  $J = 7.2$  Hz, 3H).  $^{13}\text{C}$  NMR (100 MHz,  $\text{CDCl}_3$ ):  $\delta$  158.6, 148.0, 144.7 (d,  $^4J_{\text{C-F}} = 1.7$  Hz), 141.1, 136.4, 129.7, 129.6, 129.0 (q,  $^2J_{\text{C-F}} = 32.7$  Hz), 127.5, 127.3, 126.9, 126.7, 125.2 (q,  $^4J_{\text{C-F}} = 3.7$  Hz), 122.9, 15.7.  $^{19}\text{F}$  NMR (376 MHz,  $\text{CDCl}_3$ ): -62.45 (s). IR (neat): 3060, 2982, 2922, 1737, 1615, 1501, 1163, 1067, 1016, 846, 823, 769, 756, 681  $\text{cm}^{-1}$ . HRMS (ESI-TOF)  $m/z$ :  $[M+H]^+$  Calcd for  $\text{C}_{19}\text{H}_{15}\text{NF}_3$  314.1151; Found 314.1145.

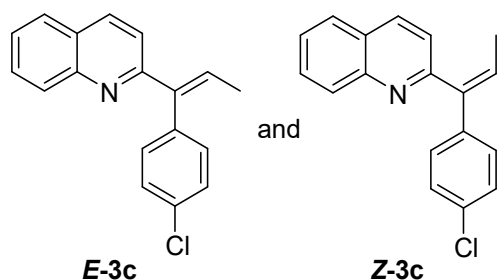

**(E)-2-(1-(4-Chlorophenyl)prop-1-en-1-yl)quinoline (E-3c).** CuCl (10 mol%, 3.0 mg), PCy<sub>3</sub> (10 mol%, 8.4 mg), B<sub>2</sub>pin<sub>2</sub> (1.5 equiv., 114.3 mg), KO<sup>t</sup>Bu (1.5 equiv., 50.5 mg) and THF (1.5 mL), **1c** (0.3 mmol, 45.2 mg) and **2a** (1.5 equiv., 65.3 mg) were stirred at 80 °C in an oil bath for 24 h. Purification by column chromatography on silica gel (eluent: petroleum ether/ethyl acetate = 30/1) to afford the title product *E-3c* in 66% yield (55.1 mg) followed by *Z-3c* in 15% yield (12.7 mg). **For the characterization of E-3c:** A light yellow oil. <sup>1</sup>H NMR (500 MHz, CDCl<sub>3</sub>): δ 8.09 (d, *J* = 8.5 Hz, 1H), 7.96 (d, *J* = 9.0 Hz, 1H), 7.73 (d, *J* = 8.5 Hz, 1H), 7.68 (td, *J* = 5.0, 1.5 Hz, 1H), 7.47 (td, *J* = 7.3, 0.5 Hz, 1H), 7.39 (d, *J* = 5.3 Hz, 2H), 7.20 (d, *J* = 7.3 Hz, 2H), 7.08 (q, *J* = 7.0 Hz, 1H), 7.04 (d, *J* = 10.0 Hz, 1H), 1.86 (d, *J* = 7.5 Hz, 3H). <sup>13</sup>C NMR (125 MHz, CDCl<sub>3</sub>): δ 158.6, 147.8, 141.1, 137.0, 136.0, 133.1, 131.5, 130.5, 129.54, 129.49, 128.6, 127.3, 127.0, 126.0, 120.5, 15.7. IR (neat): 3060, 3034, 2922, 2848, 1592, 1552, 1500, 1488, 1423, 1241, 1085, 1015, 952, 924, 822, 809, 784, 769, 758, 737, 699 cm<sup>-1</sup>. HRMS (ESI-TOF) *m/z*: [M+H]<sup>+</sup> Calcd for C<sub>18</sub>H<sub>15</sub>NCl 280.0888; Found 280.0880.

**For the characterization of Z-3c:** A light yellow oil. <sup>1</sup>H NMR (500 MHz, CDCl<sub>3</sub>): δ 8.20-8.16 (m, 2H), 7.85 (d, *J* = 7.5 Hz, 1H), 7.75 (t, *J* = 7.0 Hz, 1H), 7.58 (t, *J* = 7.5 Hz, 1H), 7.27-7.23 (m, 3H), 7.19-7.18 (m, 2H), 6.40 (q, *J* = 7.0 Hz, 1H), 1.85 (d, *J* = 7.5 Hz, 3H). <sup>13</sup>C NMR (126 MHz, CDCl<sub>3</sub>): δ 158.9, 148.0, 141.0, 139.7, 136.3, 132.9, 129.6, 129.5, 128.40, 128.36, 128.1, 127.5, 126.9, 126.6, 123.0, 15.6. IR (neat): 3058, 2924, 2848, 1596, 1557, 1500, 1490, 1424, 1402, 1174, 1091, 1013, 843, 757, 719 cm<sup>-1</sup>. HRMS (ESI-TOF) *m/z*: [M+H]<sup>+</sup> Calcd for C<sub>18</sub>H<sub>15</sub>NCl 280.0888; Found 280.0889.

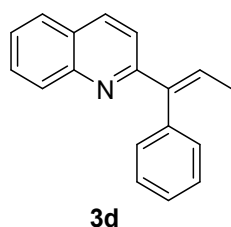

**(E)-2-(1-Phenylprop-1-en-1-yl)quinoline (3d).** CuCl (10 mol%, 3.0 mg), PCy<sub>3</sub> (10 mol%, 8.4 mg), B<sub>2</sub>pin<sub>2</sub> (1.5 equiv., 114.3 mg), KO<sup>t</sup>Bu (1.5 equiv., 50.5 mg) and THF (1.5 mL), **1d** (0.3 mmol, 34.8 mg) and **2a** (1.5 equiv., 65.3 mg) were stirred at 80 °C in an oil bath for 24 h.

Purification by column chromatography on silica gel (eluent: petroleum ether/ethyl acetate = 30/1) to afford the title product **3d** in 85% yield (62.7 mg) as a yellow oil. <sup>1</sup>H NMR (400 MHz, CDCl<sub>3</sub>): δ 8.11 (d, *J* = 8.4 Hz, 1H), δ 7.93 (d, *J* = 8.8 Hz, 1H), 7.71 (d, *J* = 8.4 Hz, 1H), 7.68 (td, *J* = 7.0, 1.6 Hz, 1H), 7.45 (td, *J* = 7.4, 1.2 Hz, 1H), 7.41 (d, *J* = 7.6 Hz, 2H), 7.37-7.35 (m, 1H), 7.27 (d, *J* = 7.6 Hz, 2H), 7.10 (q, *J* = 7.2 Hz, 1H), 7.03 (d, *J* = 8.4 Hz, 1H), 1.86 (d, *J* = 7.6 Hz, 3H). <sup>13</sup>C NMR (100 MHz, CDCl<sub>3</sub>): δ 159.0, 147.8, 142.0, 138.6, 135.8, 130.1, 130.0, 129.44, 129.41, 128.4, 127.3, 127.1, 127.0, 125.9, 120.7, 15.7. IR (neat): 3056, 2909, 2852, 1615, 1592, 1500, 1424, 1239, 950, 909, 825, 785, 774, 753, 702 cm<sup>-1</sup>. HRMS (ESI-TOF) *m/z*: [M+H]<sup>+</sup> Calcd for C<sub>18</sub>H<sub>16</sub>N 246.1277; Found 246.1278.

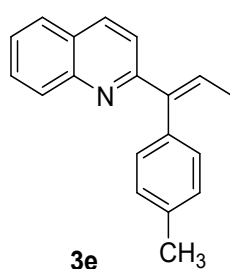

**(E)-2-(1-(*p*-Tolyl)prop-1-en-1-yl)quinoline (3e).** CuCl (10 mol%, 3.0 mg), PCy<sub>3</sub> (10 mol%, 8.4 mg), B<sub>2</sub>pin<sub>2</sub> (1.5 equiv., 114.3 mg), KO<sup>t</sup>Bu (1.5 equiv., 50.5 mg) and THF (1.5 mL), **1e** (0.3 mmol, 39.1 mg) and **2a** (1.5 equiv., 65.3 mg) were stirred at 80 °C in an oil bath for 24 h. Purification by column chromatography on silica gel (eluent: petroleum ether/ethyl acetate = 20/1) to afford the title product **3e** in 80% yield (62.0 mg) as a yellow oil. <sup>1</sup>H NMR (400 MHz, CDCl<sub>3</sub>): δ 8.11 (d, *J* = 8.4 Hz, 1H), 7.92 (d, *J* = 8.4 Hz, 1H), 7.71 (d, *J* = 8.4 Hz, 1H), 7.67 (td, *J* = 7.2, 1.2 Hz, 1H), 7.45 (td, *J* = 7.6, 0.8 Hz, 1H), 7.22 (d, *J* = 8.0 Hz, 2H), 7.16 (d, *J* = 8.0 Hz, 2H), 7.08-7.03 (m, 2H), 2.40 (s, 3H), 1.87 (d, *J* = 7.2 Hz, 3H). <sup>13</sup>C NMR (100 MHz, CDCl<sub>3</sub>): δ 159.3, 147.8, 141.9, 136.8, 135.8, 135.6, 130.0, 129.8, 129.43, 129.37, 129.1, 127.3, 127.0, 125.8, 120.8, 21.2, 15.7. IR (neat): 2919, 2853, 1615, 1593, 1510, 1450, 1424, 1239, 1109, 951, 783, 754, 726, 696 cm<sup>-1</sup>. HRMS (ESI-TOF) *m/z*: [M+H]<sup>+</sup> Calcd for C<sub>19</sub>H<sub>18</sub>N 260.1434; Found 260.1434.

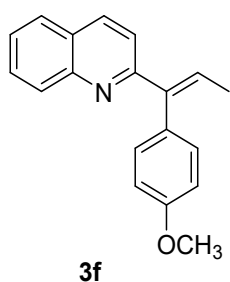

**(E)-2-(1-(4-Methoxyphenyl)prop-1-en-1-yl)quinoline (3f).** CuCl (10 mol%, 3.0 mg), PCy<sub>3</sub> (10 mol%, 8.4 mg), B<sub>2</sub>pin<sub>2</sub> (1.5 equiv., 114.3 mg), KO<sup>t</sup>Bu (1.5 equiv., 50.5 mg) and THF (1.5 mL), **1f** (0.3 mmol, 43.9 mg) and **2a** (1.5 equiv., 65.3 mg) were stirred at 80 °C in an oil bath for 24 h. Purification by column chromatography on silica gel (eluent: petroleum ether/ethyl acetate = 20/1) to afford the title product **3f** in 77% yield (63.9 mg) as a yellow oil. <sup>1</sup>H NMR (400 MHz, CDCl<sub>3</sub>): δ 8.11 (d, *J* = 8.4 Hz, 1H), 7.93 (d, *J* = 8.4 Hz, 1H), 7.71 (d, *J* = 8.4 Hz, 1H), 7.67 (td, *J* = 7.2, 1.2 Hz, 1H), 7.45 (t, *J* = 7.2 Hz, 1H), 7.19 (d, *J* = 8.8 Hz, 2H), 7.06 (d, *J* = 8.8 Hz, 1H), 7.03 (q, *J* = 7.2 Hz, 1H), 6.95 (d, *J* = 8.4 Hz, 2H), 3.83 (s, 3H), 1.88 (d, *J* = 7.2 Hz, 3H). <sup>13</sup>C NMR (100 MHz, CDCl<sub>3</sub>): δ 159.4, 158.6, 147.8, 141.6, 135.7, 131.2, 130.8, 129.7, 129.4, 129.3, 127.3, 127.0, 125.8, 120.8, 113.8, 55.1, 15.7. IR (neat): 3035, 2931, 2834, 1607, 1593, 1508, 1424, 1288, 1243, 1171, 1033, 909, 839, 820, 755, 730, 697 cm<sup>-1</sup>. HRMS (ESI-TOF) *m/z*: [M+H]<sup>+</sup> Calcd for C<sub>19</sub>H<sub>18</sub>NO 276.1383; Found 276.1385.

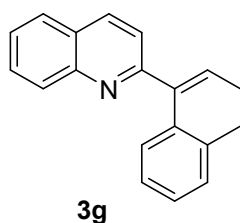

**(E)-2-(1-(*o*-Tolyl)prop-1-en-1-yl)quinoline (3g).** CuCl (10 mol%, 3.0 mg), PCy<sub>3</sub> (10 mol%, 8.4 mg), B<sub>2</sub>pin<sub>2</sub> (1.5 equiv., 114.3 mg), KO<sup>t</sup>Bu (1.5 equiv., 50.5 mg) and THF (1.5 mL), **1g** (0.3 mmol, 39.1 mg) and **2a** (1.5 equiv., 65.3 mg) were stirred at 80 °C in an oil bath for 24 h. Purification by column chromatography on silica gel (eluent: petroleum ether/ethyl acetate = 20/1) to afford the title product **3g** in 47% yield (36.5 mg) as a yellow oil. <sup>1</sup>H NMR (400 MHz, CDCl<sub>3</sub>): δ 8.11 (d, *J* = 8.4 Hz, 1H), 7.92 (d, *J* = 8.8 Hz, 1H), 7.71 (d, *J* = 8.8 Hz, 1H), 7.68 (td, *J* = 8.4, 1.2 Hz, 1H), 7.45 (td, *J* = 7.6, 0.8 Hz, 1H), 7.35-7.25 (m, 4H), 7.18 (m, 1H), 6.90 (d, *J* = 8.8 Hz, 1H), 2.11 (s, 3H), 1.72 (d, *J* = 7.2 Hz, 3H). <sup>13</sup>C NMR (100 MHz, CDCl<sub>3</sub>): δ 157.8, 148.0, 141.1, 138.0, 137.0, 136.2, 130.4, 130.2, 130.0, 129.43, 129.41, 127.5, 127.3, 127.1, 126.0, 125.7, 119.8, 19.7, 15.5. IR (neat): 3059, 2910, 1616, 1592, 1501, 1424, 907, 822, 784, 753, 728, 696 cm<sup>-1</sup>. HRMS (ESI-TOF) *m/z*: [M+H]<sup>+</sup> Calcd for C<sub>19</sub>H<sub>18</sub>N 260.1434; Found 260.1432.

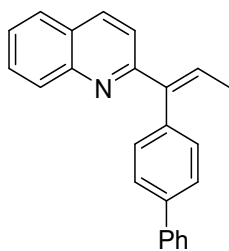

**3h**

**(E)-2-(1-([1,1'-Biphenyl]-4-yl)prop-1-en-1-yl)quinoline (3h).** CuCl (10 mol%, 3.0 mg), PCy<sub>3</sub> (10 mol%, 8.4 mg), B<sub>2</sub>pin<sub>2</sub> (1.5 equiv., 114.3 mg), KO<sup>t</sup>Bu (1.5 equiv., 50.5 mg) and THF (1.5 mL), **1h** (0.3 mmol, 57.7 mg) and **2a** (1.5 equiv., 65.3 mg) were stirred at 80 °C in an oil bath for 24 h. Purification by column chromatography on silica gel (eluent: petroleum ether/ethyl acetate = 30/1) to afford the title product **3h** in 66% yield (63.9 mg) as a white solid. <sup>1</sup>H NMR (500 MHz, CDCl<sub>3</sub>): δ 8.13 (d, *J* = 8.0 Hz, 1H), 7.95 (d, *J* = 9.0 Hz, 1H), 7.73 (d, *J* = 8.5 Hz, 1H), 7.68 (td, *J* = 8.3, 1.5 Hz, 1H), 7.67-7.65 (m, 4H), 7.48-7.43 (m, 3H), 7.36-7.33 (m, 3H), 7.11 (q, *J* = 8.5 Hz, 2H), 1.92 (d, *J* = 7.0 Hz, 3H). <sup>13</sup>C NMR (125 MHz, CDCl<sub>3</sub>): δ 159.1, 147.9, 141.7, 140.7, 139.9, 137.6, 135.9, 130.6, 130.2, 129.5, 129.4, 128.8, 127.33, 127.28, 127.1, 127.0, 125.9, 120.8, 15.8. IR (neat): 3026, 2969, 2930, 2851, 1593, 1555, 1502, 1487, 1424, 1240, 1118, 1004, 952, 852, 821, 771, 751, 729, 691 cm<sup>-1</sup>. HRMS (ESI-TOF) *m/z*: [M+H]<sup>+</sup> Calcd for C<sub>24</sub>H<sub>20</sub>N 322.1590; Found 322.1592.

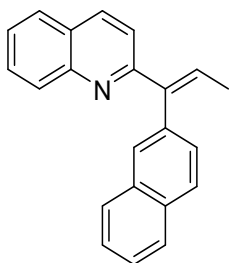

**3i**

**(E)-2-(1-(Naphthalen-2-yl)prop-1-en-1-yl)quinoline (3i).** CuCl (10 mol%, 3.0 mg), PCy<sub>3</sub> (10 mol%, 8.4 mg), B<sub>2</sub>pin<sub>2</sub> (1.5 equiv., 114.3 mg), KO<sup>t</sup>Bu (1.5 equiv., 50.5 mg) and THF (1.5 mL), **1i** (0.3 mmol, 49.9 mg) and **2a** (1.5 equiv., 65.3 mg) were stirred at 80 °C in an oil bath for 24 h. Purification by column chromatography on silica gel (eluent: petroleum ether/ethyl acetate = 20/1) to afford the title product **3i** in 81% yield (71.4 mg) as a yellow oil. <sup>1</sup>H NMR (400 MHz, CDCl<sub>3</sub>): δ 8.13 (d, *J* = 8.4 Hz, 1H), 7.89-7.81 (m, 4H), 7.76 (s, 1H), 7.70-7.65 (m, 2H), 7.49-7.42 (m, 3H), 7.36 (dd, *J* = 8.4, 1.2 Hz, 1H), 7.18 (q, *J* = 10.8 Hz, 1H), 7.03 (d, *J* = 8.4 Hz, 1H), 1.91 (d, *J* = 7.6 Hz, 3H). <sup>13</sup>C NMR (100 MHz, CDCl<sub>3</sub>): δ 159.0, 147.9, 142.0, 136.1, 135.8, 133.4, 132.5, 130.4, 129.4, 129.0, 128.2, 128.0, 127.9, 127.7, 127.3, 127.0, 126.1, 125.94,

125.88, 120.8, 15.8. IR (neat): 3054, 2906, 2848, 1615, 1592, 1555, 1450, 1424, 906, 859, 821, 784, 728, 695  $\text{cm}^{-1}$ . HRMS (ESI-TOF)  $m/z$ :  $[M+H]^+$  Calcd for  $\text{C}_{22}\text{H}_{18}\text{N}$  296.1434; Found 296.1438.

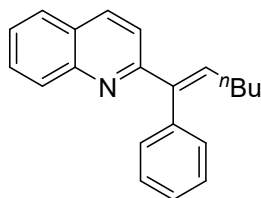

**3j**

**(E)-2-(1-Phenylhex-1-en-1-yl)quinoline (3j).** CuCl (10 mol%, 3.0 mg),  $\text{PCy}_3$  (10 mol%, 8.4 mg),  $\text{B}_2\text{pin}_2$  (1.5 equiv., 114.3 mg), KO<sup>t</sup>Bu (1.5 equiv., 50.5 mg) and THF (1.5 mL), **1j** (0.3 mmol, 47.5 mg) and **2a** (1.5 equiv., 65.3 mg) were stirred at 80 °C in an oil bath for 24 h. Purification by column chromatography on silica gel (eluent: petroleum ether/ethyl acetate = 20/1) to afford the title product **3j** in 65% yield (55.9 mg) as a yellow oil.  $^1\text{H}$  NMR (400 MHz,  $\text{CDCl}_3$ ):  $\delta$  8.10 (d,  $J = 8.4$  Hz, 1H), 7.92 (d,  $J = 8.4$  Hz, 1H), 7.70 (d,  $J = 8.0$  Hz, 1H), 7.66 (td,  $J = 7.6, 1.6$  Hz, 1H), 7.46-7.40 (m, 3H), 7.40-7.33 (m, 1H), 7.28-7.23 (m, 2H), 7.08-7.03 (m, 2H), 2.20 (q,  $J = 7.6$  Hz, 2H), 1.54-1.48 (m, 2H), 1.39-1.33 (m, 2H), 0.88 (t,  $J = 7.2$  Hz, 3H).  $^{13}\text{C}$  NMR (100 MHz,  $\text{CDCl}_3$ ):  $\delta$  158.9, 147.9, 141.0, 139.0, 135.8, 135.7, 130.0, 129.5, 129.4, 128.4, 127.3, 127.1, 127.0, 125.8, 120.7, 31.8, 29.6, 22.5, 13.9. IR (neat): 3056, 2955, 2925, 2856, 1616, 1593, 1554, 1501, 1424, 828, 773, 753, 703  $\text{cm}^{-1}$ . HRMS (ESI-TOF)  $m/z$ :  $[M+H]^+$  Calcd for  $\text{C}_{21}\text{H}_{22}\text{N}$  288.1747; Found 288.1750.

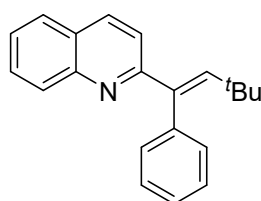

**3k**

**(E)-2-(3,3-Dimethyl-1-phenylbut-1-en-1-yl)quinoline (3k).** In the nitrogen-filled glove box, CuCl (10 mol%, 5.0 mg),  $\text{PCy}_3$  (10 mol%, 14.0 mg),  $\text{B}_2\text{pin}_2$  (1.5 equiv., 190.5 mg), KO<sup>t</sup>Bu (1.5 equiv., 84.2 mg) and THF (2.5 mL) were added to screw-cap vial. The solvent stirred at ambient temperature for 1 minute. Then **1k** (0.5 mmol, 79.1 mg) and **2a** (1.5 equiv., 108.9 mg) were added. After the reaction mixture was stirred in an oil bath preheated at 80 °C (oil bath) for 24 h. Purification by column chromatography on silica gel (eluent: petroleum ether/ethyl acetate = 30/1) to afford the title product **3k** in 20% yield (28.8 mg) as a colorless oil.  $^1\text{H}$  NMR (400 MHz,  $\text{CDCl}_3$ ):  $\delta$  8.10 (d,  $J = 8.8$  Hz, 1H), 7.89 (d,  $J = 8.4$  Hz, 1H), 7.70-7.64 (m, 2H), 7.46-

7.35 (m, 4H), 7.31-7.29 (m, 2H), 7.24-7.23 (m, 1H), 6.94 (d,  $J = 8.4$  Hz, 1H), 1.05 (s, 9H).  $^{13}\text{C}$  NMR (100 MHz,  $\text{CDCl}_3$ ):  $\delta$  159.4, 147.7, 144.6, 139.6, 138.3, 135.8, 130.7, 129.6, 129.3, 128.0, 127.2, 127.1, 126.9, 125.8, 120.3, 34.1, 31.1. IR (neat): 3057, 2957, 2900, 2865, 1616, 1592, 1553, 1499, 1424, 1364, 1257, 1238, 908, 827, 780, 754, 731, 716, 701  $\text{cm}^{-1}$ . HRMS (ESI-TOF)  $m/z$ :  $[\text{M}+\text{H}]^+$  Calcd for  $\text{C}_{21}\text{H}_{22}\text{N}$  288.1747; Found 280.1752.

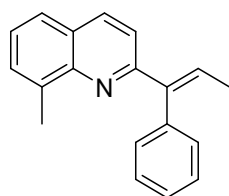

**3l**

**(E)-8-Methyl-2-(1-phenylprop-1-en-1-yl)quinoline (3l).**  $\text{CuCl}$  (10 mol%, 3.0 mg),  $\text{PCy}_3$  (10 mol%, 8.4 mg),  $\text{B}_2\text{pin}_2$  (1.5 equiv., 114.3 mg),  $\text{KO}^t\text{Bu}$  (1.5 equiv., 50.5 mg) and THF (1.5 mL), **1d** (0.3 mmol, 34.8 mg) and **2b** (1.5 equiv., 71.6 mg) were stirred at 80 °C in an oil bath for 24 h. Purification by column chromatography on silica gel (eluent: petroleum ether/ethyl acetate = 30/1) to afford the title product **3l** in 63% yield (49.3 mg) as a colorless oil.  $^1\text{H}$  NMR (400 MHz,  $\text{CDCl}_3$ ):  $\delta$  7.88 (d,  $J = 8.4$  Hz, 1H), 7.55-7.50 (m, 2H), 7.44-7.41 (m, 2H), 7.36-7.28 (m, 5H), 7.04 (d,  $J = 8.8$  Hz, 1H), 2.83 (s, 3H), 1.84 (d,  $J = 7.6$  Hz, 3H).  $^{13}\text{C}$  NMR (100 MHz,  $\text{CDCl}_3$ ):  $\delta$  157.0, 146.7, 142.2, 138.8, 137.2, 136.1, 130.2, 129.5, 128.3, 127.0, 126.9, 125.5, 125.3, 120.0, 17.8, 15.7. IR (neat): 3039, 2914, 2852, 1612, 1595, 1563, 1497, 1439, 1424, 1352, 831, 761  $\text{cm}^{-1}$ . HRMS (ESI-TOF)  $m/z$ :  $[\text{M}+\text{H}]^+$  Calcd for  $\text{C}_{19}\text{H}_{18}\text{N}$  260.1434; Found 260.1434.

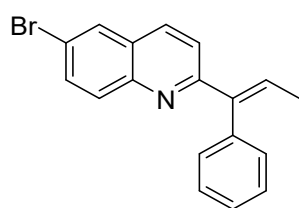

**3m**

**(E)-6-Bromo-2-(1-phenylprop-1-en-1-yl)quinoline (3m).**  $\text{CuCl}$  (10 mol%, 3.0 mg),  $\text{PCy}_3$  (10 mol%, 8.4 mg),  $\text{B}_2\text{pin}_2$  (1.5 equiv., 114.3 mg),  $\text{KO}^t\text{Bu}$  (1.5 equiv., 50.5 mg) and THF (1.5 mL), **1d** (0.3 mmol, 34.8 mg) and **2c** (1.5 equiv., 100.8 mg) were stirred at 80 °C in an oil bath for 24 h. Purification by column chromatography on silica gel (eluent: petroleum ether/ethyl acetate = 30/1) to afford the title product **3m** in 69% yield (66.8 mg) as a yellow oil.  $^1\text{H}$  NMR (500 MHz,  $\text{CDCl}_3$ ):  $\delta$  7.95 (d,  $J = 9.0$  Hz, 1H), 7.87 (d,  $J = 2.0$  Hz, 1H), 7.83 (d,  $J = 8.5$  Hz, 1H), 7.73 (dd,  $J = 9.3, 2.5$  Hz, 1H), 7.43 (t,  $J = 8.0$  Hz, 2H), 7.37-7.35 (m, 1H), 7.26-7.25 (m, 2H), 7.12 (q,  $J = 7.0$  Hz, 1H), 7.05 (d,  $J = 9.0$  Hz, 1H), 1.85 (d,  $J = 7.5$  Hz, 3H).  $^{13}\text{C}$  NMR (125

MHz, CDCl<sub>3</sub>):  $\delta$  159.3, 146.4, 141.8, 138.3, 134.8, 132.8, 131.2, 130.6, 130.1, 129.3, 128.5, 128.1, 127.3, 121.5, 119.6, 15.8. IR (neat): 3054, 2910, 2850, 1737, 1589, 1542, 1484, 1439, 1372, 1238, 1185, 1057, 926, 881, 865, 841, 821, 811, 766, 711, 691 cm<sup>-1</sup>. HRMS (ESI-TOF) m/z: [M+H]<sup>+</sup> Calcd for C<sub>18</sub>H<sub>15</sub>NBr 324.0382; Found 324.0387.

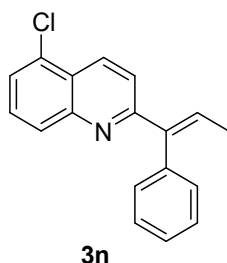

**(E)-5-Chloro-2-(1-phenylprop-1-en-1-yl)quinoline (3n).** CuCl (10 mol%, 3.0 mg), PCy<sub>3</sub> (10 mol%, 8.4 mg), B<sub>2</sub>pin<sub>2</sub> (1.5 equiv., 114.3 mg), KO<sup>t</sup>Bu (1.5 equiv., 50.5 mg) and THF (1.5 mL), **1d** (0.3 mmol, 34.8 mg) and **2d** (1.5 equiv., 80.8 mg) were stirred at 80 °C in an oil bath for 24 h. Purification by column chromatography on silica gel (eluent: petroleum ether/ethyl acetate = 30/1) to afford the title product **3n** in 74% yield (62.5 mg) as a yellow oil. <sup>1</sup>H NMR (400 MHz, CDCl<sub>3</sub>):  $\delta$  8.33 (d, *J* = 8.8 Hz, 1H), 8.02 (d, *J* = 8.4 Hz, 1H), 7.59-7.51 (m, 2H), 7.45-7.34 (m, 3H), 7.26 (d, *J* = 7.6 Hz, 2H), 7.17-7.11 (m, 2H), 1.87 (d, *J* = 7.2 Hz, 3H). <sup>13</sup>C NMR (100 MHz, CDCl<sub>3</sub>):  $\delta$  159.5, 148.5, 141.6, 138.2, 132.7, 131.0, 130.9, 130.1, 129.1, 128.6, 128.5, 127.3, 125.8, 125.1, 121.5, 15.8. IR (neat): 3056, 2909, 2848, 1608, 1584, 1548, 1492, 1400, 1393, 1261, 1129, 960, 806, 758, 702, 673 cm<sup>-1</sup>. HRMS (ESI-TOF) m/z: [M+H]<sup>+</sup> Calcd for C<sub>18</sub>H<sub>15</sub>NCl 280.0888; Found 280.0895.

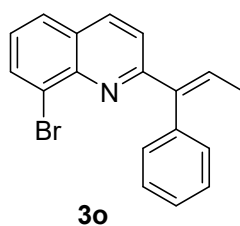

**(E)-8-Bromo-2-(1-phenylprop-1-en-1-yl)quinoline (3o).** CuCl (10 mol%, 3.0 mg), PCy<sub>3</sub> (10 mol%, 8.4 mg), B<sub>2</sub>pin<sub>2</sub> (1.5 equiv., 114.3 mg), KO<sup>t</sup>Bu (1.5 equiv., 50.5 mg) and THF (1.5 mL), **1d** (0.3 mmol, 34.8 mg) and **2e** (1.5 equiv., 100.8 mg) were stirred at 80 °C in an oil bath for 24 h. Purification by column chromatography on silica gel (eluent: petroleum ether/ethyl acetate = 30/1) to afford the title product **3o** in 22% yield (21.6 mg) as a yellow oil. <sup>1</sup>H NMR (400 MHz, CDCl<sub>3</sub>):  $\delta$  8.02 (d, *J* = 7.6 Hz, 1H), 7.92 (d, *J* = 8.8 Hz, 1H), 7.68 (d, *J* = 8.0 Hz, 1H), 7.54-7.43 (m, 3H), 7.39-7.36 (m, 1H), 7.31-7.25 (m, 3H), 7.05 (d, *J* = 8.8 Hz, 1H), 1.86 (d, *J* =



7.2 Hz, 3H).  $^{13}\text{C}$  NMR (100 MHz,  $\text{CDCl}_3$ ):  $\delta$  158.9, 144.6, 141.4, 138.3, 136.5, 133.1, 131.5, 130.2, 128.5, 128.2, 127.2, 126.1, 125.1, 121.1, 15.9. IR (neat): 3054, 2925, 1590, 1538, 1493, 1439, 1422, 1310, 1262, 960, 797, 701, 655  $\text{cm}^{-1}$ . HRMS (ESI-TOF)  $m/z$ :  $[\text{M}+\text{H}]^+$  Calcd for  $\text{C}_{18}\text{H}_{15}\text{NBr}$  324.0382; Found 324.0388.

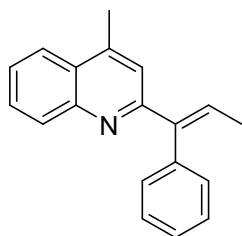

**3p**

**(E)-4-Methyl-2-(1-phenylprop-1-en-1-yl)quinoline (3p).** In the nitrogen-filled glove box,  $\text{CuCl}$  (10 mol%, 3.0 mg),  $\text{PCy}_3$  (10 mol%, 8.4 mg),  $\text{B}_2\text{pin}_2$  (1.5 equiv., 114.3 mg),  $\text{KO}^t\text{Bu}$  (1.5 equiv., 50.5 mg) and THF (1.5 mL) were added to screw-cap vial. The solvent stirred at ambient temperature for 1 minute. Then **1d** (0.3 mmol, 34.8 mg) and **2f** (1.5 equiv., 71.6 mg) were added. The reaction mixture was stirred in an oil bath preheated at 80  $^\circ\text{C}$  (oil bath) for 24 h. Purification by column chromatography on silica gel (eluent: petroleum ether/ethyl acetate = 20/1) to afford the title product **3p** in 15% yield (12.0 mg) as a yellow oil. Purification by column chromatography on silica gel (eluent: petroleum ether/ethyl acetate = 20/1) to afford the title product **3p** in 15% yield (12.0 mg) as a yellow oil.  $^1\text{H}$  NMR (400 MHz,  $\text{CDCl}_3$ ):  $\delta$  8.12 (d,  $J = 8.8$  Hz, 1H), 7.91 (d,  $J = 8.4$  Hz, 1H), 7.68 (t,  $J = 7.2$  Hz, 1H), 7.50 (t,  $J = 7.2$  Hz, 1H), 7.45-7.42 (m, 2H), 7.38-7.35 (m, 1H), 7.29-7.27 (m, 2H), 7.06 (q,  $J = 7.2$  Hz, 1H), 6.87 (s, 1H), 2.55 (s, 3H), 1.86 (d,  $J = 6.8$  Hz, 3H).  $^{13}\text{C}$  NMR (100 MHz,  $\text{CDCl}_3$ ):  $\delta$  182.1, 158.8, 147.7, 144.0, 142.1, 138.7, 130.2, 130.0, 129.8, 129.1, 128.4, 127.1, 125.6, 123.5, 121.4, 18.8, 15.7. IR (neat): 3056, 2908, 2852, 1737, 1593, 1548, 1505, 1494, 1440, 1314, 1266, 883, 756, 730, 701, 676, 607, 530, 422  $\text{cm}^{-1}$ . HRMS (ESI-TOF)  $m/z$ :  $[\text{M}+\text{H}]^+$  Calcd for  $\text{C}_{19}\text{H}_{18}\text{N}$  260.1434; Found 260.1440.

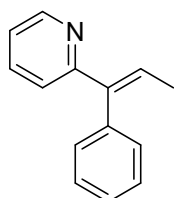

**3q**

**(E)-2-(1-phenylprop-1-en-1-yl)pyridine (3q).** In the nitrogen-filled glove box,  $\text{CuCl}$  (10 mol%, 5.0 mg),  $\text{PCy}_3$  (10 mol%, 14.0 mg),  $\text{B}_2\text{pin}_2$  (1.5 equiv., 190.5 mg),  $\text{KO}^t\text{Bu}$  (1.5 equiv.,

84.2 mg) and THF (2.5 mL) were added to screw-cap vial. The solvent stirred at ambient temperature for 1 minute. Then **1d** (0.5 mmol, 58.1 mg) and pyridine *N*-oxide **2g** (1.5 equiv., 71.3 mg) were added. After the reaction mixture was stirred in an oil bath preheated at 80 °C (oil bath) for 24 h. No desired product was formed according to TLC analysis. Instead, the hydroborated product of (*Z*)-4,4,5,5-tetramethyl-2-(1-phenylprop-1-en-2-yl)-1,3,2-dioxaborolane was obtained in 21% yield (26 mg) as a yellow oil.

For the characterization of (*Z*)-4,4,5,5-tetramethyl-2-(1-phenylprop-1-en-2-yl)-1,3,2-dioxaborolane<sup>6</sup>

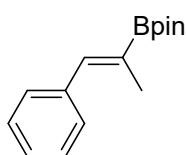

<sup>1</sup>H NMR (400 MHz, CDCl<sub>3</sub>): δ 7.39-7.32 (m, 4H), 7.24-7.22 (m, 2H), 1.99 (s, 3H), 1.31 (s, 12H). <sup>13</sup>C NMR (100 MHz, CDCl<sub>3</sub>): δ 142.3, 137.9, 129.4, 128.0, 127.0, 83.5, 24.8, 15.9.

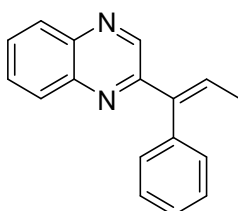

**3r**

**(*E*)-2-(1-Phenylprop-1-en-1-yl)quinoxaline (3r).** In the nitrogen-filled glove box, CuCl (10 mol%, 3.0 mg), PCy<sub>3</sub> (10 mol%, 8.4 mg), B<sub>2</sub>pin<sub>2</sub> (1.5 equiv., 114.3 mg), KO<sup>t</sup>Bu (1.5 equiv., 50.5 mg) and THF (1.5 mL) was added to screw-cap vial. The solvent stirred at ambient temperature for 1 minute. Then **1d** (0.3 mmol, 34.8 mg) and quinoxaline 1-oxide (1.5 equiv., 65.8 mg) were added. After the reaction mixture was stirred in an oil bath preheated at 80 °C (oil bath) for 24 h. No desired product was observed according to TLC analysis.

### Synthesis of products 5a-5e.

#### Typical procedure for the synthesis of 5a.

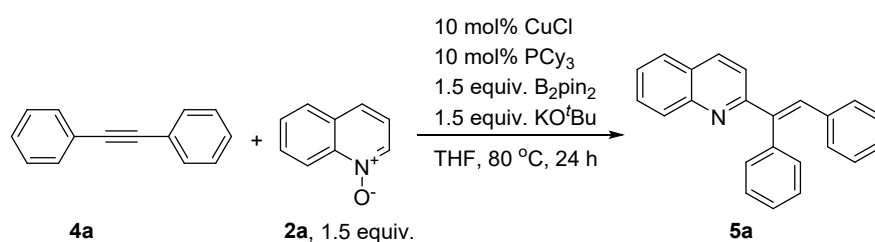

**(*E*)-2-(1,2-Diphenylvinyl)quinoline (5a).** In the nitrogen-filled glove box, CuCl (10 mol%, 3.0

mg), PCy<sub>3</sub> (10 mol%, 8.4 mg), B<sub>2</sub>pin<sub>2</sub> (1.5 equiv., 114.3 mg), KO<sup>t</sup>Bu (1.5 equiv., 50.5 mg) and THF (1.5 mL) were added to screw-cap vial (4 mL). The solvent stirred at ambient temperature for 1 minute. Then **4a** (0.3 mmol, 53.5 mg) and **2a** (1.5 equiv., 65.3 mg) were added. The vial was sealed with a screw cap featuring a PTFE/silicone septum and taken outside the glove box. After the reaction mixture was stirred in an oil bath preheated at 80 °C (oil bath) for 24 h, the mixture was filtered over a pad of silica gel and washed with ethyl acetate. The solvent was evaporated under the reduced pressure. the residue was purified by column chromatography on silica gel (eluent: petroleum ether/ethyl acetate = 30/1) to afford the product **5a** in 90% yield (83.2 mg) as a yellow oil. <sup>1</sup>H NMR (400 MHz, CDCl<sub>3</sub>): δ 8.17 (d, *J* = 8.4 Hz, 1H), 7.95-7.93 (m, 2H), 7.72 (d, *J* = 7.6 Hz, 1H), 7.68 (td, *J* = 8.0, 0.8 Hz, 1H), 7.47 (t, *J* = 6.8 Hz, 1H), 7.41-7.37 (m, 3H), 7.31-7.29 (m, 2H), 7.13 (s, 5H), 7.10 (d, *J* = 8.8 Hz, 1H). <sup>13</sup>C NMR (100 MHz, CDCl<sub>3</sub>): δ 159.1, 147.9, 140.9, 139.1, 136.7, 136.0, 132.5, 130.3, 130.1, 129.6, 129.5, 129.0, 127.9, 127.7, 127.4, 127.3, 127.2, 126.1, 120.8. IR (neat): 1735, 1589, 1499, 1444, 1424, 1372, 1239, 827, 787, 778, 753, 692 cm<sup>-1</sup>. HRMS (ESI-TOF) *m/z*: [M+H]<sup>+</sup> Calcd for C<sub>23</sub>H<sub>18</sub>N 308.1434; Found 308.1436.

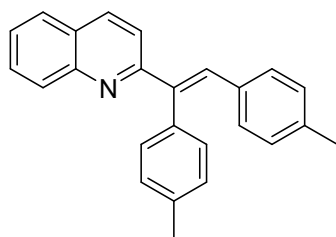

**5b**

**(E)-2-(1,2-Di-*p*-tolylvinyl)quinoline (5b).** CuCl (10 mol%, 3.0 mg), PCy<sub>3</sub> (10 mol%, 8.4 mg), B<sub>2</sub>pin<sub>2</sub> (1.5 equiv., 114.3 mg), KO<sup>t</sup>Bu (1.5 equiv., 50.5 mg) and THF (1.5 mL), **4b** (0.3 mmol, 61.9 mg) and **2a** (1.5 equiv., 65.3 mg) were stirred at 80 °C in an oil bath for 24 h. Purification by column chromatography on silica gel (eluent: petroleum ether/ethyl acetate = 30/1) to afford the title product **5b** in 85% yield (85.1 mg) as a yellow oil. <sup>1</sup>H NMR (400 MHz, CDCl<sub>3</sub>): δ 8.16 (d, *J* = 8.4 Hz, 1H), 7.92 (d, *J* = 8.4 Hz, 1H), 7.89 (s, 1H), 7.71 (d, *J* = 8.0 Hz, 1H), 7.70 (td, *J* = 8.4, 1.2 Hz, 1H), 7.45 (td, *J* = 7.6, 0.8 Hz, 1H), 7.21-7.17 (m, 4H), 7.10 (d, *J* = 8.8 Hz, 1H), 7.05 (d, *J* = 8.0 Hz, 2H), 6.95 (d, *J* = 8.0 Hz, 2H), 2.40 (s, 3H), 2.25 (s, 3H). <sup>13</sup>C NMR (100 MHz, CDCl<sub>3</sub>): δ 159.5, 147.8, 139.9, 137.2, 136.3, 135.8, 134.0, 132.3, 130.2, 130.1, 129.7, 129.5, 129.4, 128.6, 127.3, 127.1, 126.0, 120.8, 21.3, 21.2. IR (neat): 3021, 2918, 1736, 1615, 1588, 1551, 1507, 1499, 1424, 1238, 1182, 1111, 813, 757, 748, 714, 697 cm<sup>-1</sup>. HRMS (ESI-TOF) *m/z*: [M+H]<sup>+</sup> Calcd for C<sub>25</sub>H<sub>22</sub>N 336.1747; Found 336.1747.

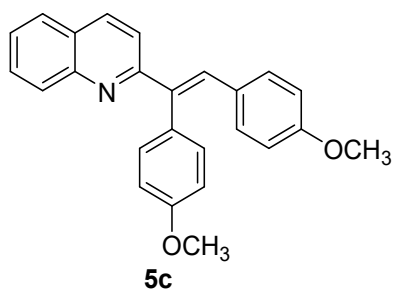

**(E)-2-(1,2-Bis(4-methoxyphenyl)vinyl)quinoline (5c).** CuCl (10 mol%, 3.0 mg), PCy<sub>3</sub> (10 mol%, 8.4 mg), B<sub>2</sub>pin<sub>2</sub> (1.5 equiv., 114.3 mg), KO<sup>t</sup>Bu (1.5 equiv., 50.5 mg) and THF (1.5 mL), **4c** (0.3 mmol, 71.5 mg) and **2a** (1.5 equiv., 65.3 mg) were stirred at 80 °C in an oil bath for 24 h. Purification by silica gel plate (eluent: petroleum ether/ethyl acetate = 10/1) followed by recycling preparative HPLC afforded the title product **5c** in 71% yield (78.1 mg) as a yellow oil. <sup>1</sup>H NMR (400 MHz, CDCl<sub>3</sub>): δ 8.17 (d, *J* = 8.4 Hz, 1H), 7.95 (d, *J* = 8.8 Hz, 1H), 7.87 (s, 1H), 7.73 (d, *J* = 8.4 Hz, 1H), 7.69 (td, *J* = 8.2, 1.2 Hz, 1H), 7.46 (td, *J* = 7.4, 1.2 Hz, 1H), 7.24-7.21 (m, 2H), 7.11 (dd, *J* = 8.4, 2.4 Hz, 3H), 6.95 (d, *J* = 8.4 Hz, 2H), 6.70 (d, *J* = 8.8 Hz, 2H), 3.85 (s, 3H), 3.74 (s, 3H). <sup>13</sup>C NMR (100 MHz, CDCl<sub>3</sub>): δ 159.6, 159.0, 158.8, 147.7, 138.3, 135.9, 132.1, 131.6, 131.53, 131.46, 129.61, 129.55, 129.3, 127.3, 127.0, 125.9, 120.8, 114.5, 113.3, 55.1, 55.0. IR (neat): 2955, 2835, 1735, 1603, 1587, 1506, 1460, 1424, 1441, 1372, 1298, 1286, 1243, 1174, 1151, 1110, 1031, 830, 813, 793, 759 cm<sup>-1</sup>. HRMS (ESI-TOF) *m/z*: [M+H]<sup>+</sup> Calcd for C<sub>25</sub>H<sub>22</sub>NO<sub>2</sub> 368.1645; Found 368.1640.

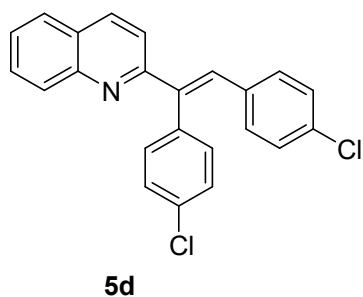

**(E)-2-(1,2-Bis(4-chlorophenyl)vinyl)quinoline (5d).** CuCl (10 mol%, 3.0 mg), PCy<sub>3</sub> (10 mol%, 8.4 mg), B<sub>2</sub>pin<sub>2</sub> (1.5 equiv., 114.3 mg), KO<sup>t</sup>Bu (1.5 equiv., 50.5 mg) and THF (1.5 mL), **4d** (0.3 mmol, 74.1 mg) and **2a** (1.5 equiv., 65.3 mg) were stirred at 80 °C in an oil bath for 24 h. Purification by column chromatography on silica gel (eluent: petroleum ether/ethyl acetate = 30/1) to afford the title product **5d** in 85% yield (95.7 mg) as a yellow oil. <sup>1</sup>H NMR (400 MHz, CDCl<sub>3</sub>): δ 8.15 (d, *J* = 8.8 Hz, 1H), 8.02 (d, *J* = 8.4 Hz, 1H), 7.86 (s, 1H), 7.78 (d, *J* = 8.0 Hz, 1H), 7.73 (td, *J* = 8.4, 1.2 Hz, 1H), 7.52 (td, *J* = 7.6, 0.8 Hz, 1H), 7.40-7.38 (m, 2H), 7.23-7.21

(m, 2H), 7.17-7.05 (m, 2H), 7.10 (d,  $J = 8.8$  Hz, 1H), 7.07-7.04 (m, 2H).  $^{13}\text{C}$  NMR (100 MHz,  $\text{CDCl}_3$ ):  $\delta$  158.3, 147.9, 140.4, 137.2, 136.2, 135.0, 133.9, 133.3, 131.7, 131.6, 131.2, 129.8, 129.6, 129.4, 128.3, 127.4, 127.3, 126.4, 120.5. IR (neat): 1735, 1590, 1500, 1488, 1425, 1403, 1239, 1089, 1013, 990, 827, 795, 755, 720, 697  $\text{cm}^{-1}$ . HRMS (ESI-TOF)  $m/z$ :  $[\text{M}+\text{H}]^+$  Calcd for  $\text{C}_{23}\text{H}_{16}\text{NCl}_2$  376.0654; Found 376.0656.

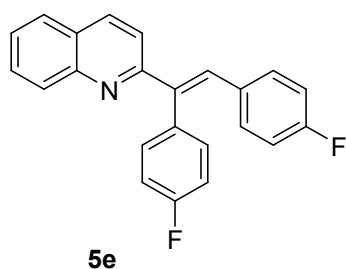

**(E)-2-(1,2-Bis(4-fluorophenyl)vinyl)quinoline (5e).**  $\text{CuCl}$  (10 mol%, 3.0 mg),  $\text{PCy}_3$  (10 mol%, 8.4 mg),  $\text{B}_2\text{pin}_2$  (1.5 equiv., 114.3 mg),  $\text{KO}^t\text{Bu}$  (1.5 equiv., 50.5 mg) and THF (1.5 mL), **4e** (0.3 mmol, 64.3 mg) and **2a** (1.5 equiv., 65.3 mg) were stirred at 80 °C in an oil bath for 24 h. Purification by column chromatography on silica gel (eluent: petroleum ether/ethyl acetate = 30/1) to afford the title product **5e** in 84% yield (86.4 mg) as a yellow solid.  $^1\text{H}$  NMR (400 MHz,  $\text{CDCl}_3$ ):  $\delta$  8.15 (d,  $J = 8.4$  Hz, 1H), 8.00 (d,  $J = 8.4$  Hz, 1H), 7.88 (s, 1H), 7.77 (d,  $J = 8.0$  Hz, 1H), 7.72 (td,  $J = 8.0, 0.8$  Hz, 1H), 7.51 (td,  $J = 7.4, 0.4$  Hz, 1H), 7.27-7.23 (m, 2H), 7.13-7.07 (m, 5H), 6.86 (t,  $J = 8.8$  Hz, 2H).  $^{13}\text{C}$  NMR (100 MHz,  $\text{CDCl}_3$ ):  $\delta$  162.4 (d,  $^1J_{\text{C-F}} = 246.1$  Hz), 161.9 (d,  $^1J_{\text{C-F}} = 246.9$  Hz), 158.7, 147.9, 139.7 (d,  $^4J_{\text{C-F}} = 1.6$  Hz), 136.2, 134.7 (d,  $^4J_{\text{C-F}} = 3.7$  Hz), 132.8 (d,  $^4J_{\text{C-F}} = 3.7$  Hz), 132.1 (d,  $^3J_{\text{C-F}} = 7.7$  Hz), 131.8 (d,  $^3J_{\text{C-F}} = 7.6$  Hz), 131.6, 129.8, 129.6, 127.4, 127.2, 126.3, 120.5, 116.2 (d,  $^2J_{\text{C-F}} = 21.0$  Hz), 115.0 (d,  $^2J_{\text{C-F}} = 21.0$  Hz).  $^{19}\text{F}$  NMR (376 MHz,  $\text{CDCl}_3$ ): -113.28--113.33 (m), -113.73--113.78 (m). IR (neat): 1591, 1426, 1221, 1160, 1147, 1093, 1015, 916, 847, 784, 754, 730, 696, 683  $\text{cm}^{-1}$ . HRMS (ESI-TOF)  $m/z$ :  $[\text{M}+\text{H}]^+$  Calcd for  $\text{C}_{23}\text{H}_{16}\text{NF}_2$  344.1245; Found 344.1249.

### Synthesis of products 5f-5j.

#### Typical procedure for the synthesis of 5f.

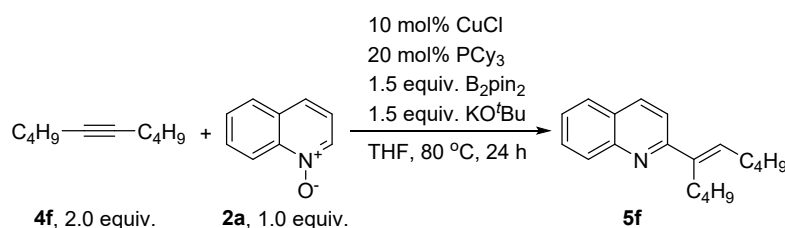

**(E)-2-(Dec-5-en-5-yl)quinoline (5f).** In the nitrogen-filled glove box,  $\text{CuCl}$  (10 mol%, 3.0 mg),

PCy<sub>3</sub> (20 mol%, 16.8 mg), B<sub>2</sub>pin<sub>2</sub> (1.5 equiv., 114.3 mg), KO<sup>t</sup>Bu (1.5 equiv., 50.5 mg) and THF (1.5 mL) were added to screw-cap vial (4 mL). The solvent stirred at room temperature for 1 minute. Then **4f** (2.0 equiv. 0.6 mmol, 83.0 mg) and **2a** (0.3 mmol, 43.5 mg) were added. The vial was sealed with a screw cap featuring a PTFE/silicone septum and taken outside the glove box. After the reaction mixture was stirred in an oil bath preheated at 80 °C (oil bath) for 24 h, the mixture was filtered over a silica gel pad and washed with ethyl acetate. The solvent was evaporated under the reduced pressure. the residue was purified by thin plate chromatography on silica gel (eluent: petroleum ether/ethyl acetate = 50/1) to afford the product **5f** in 68% yield (54.3 mg) as a light yellow oil. <sup>1</sup>H NMR (400 MHz, CDCl<sub>3</sub>): δ 8.05 (t, *J* = 8.8 Hz, 2H), 7.74 (d, *J* = 8.0 Hz, 1H), 7.65 (td, *J* = 7.6, 1.6 Hz, 1H), 7.55 (d, *J* = 8.8 Hz, 1H), 7.44 (td, *J* = 7.6, 0.8 Hz, 1H), 6.30 (t, *J* = 7.2 Hz, 1H), 2.80 (t, *J* = 7.2 Hz, 2H), 2.32 (q, *J* = 7.2 Hz, 2H), 1.53-1.34 (m, 8H), 0.95 (t, *J* = 7.2 Hz, 3H), 0.89 (t, *J* = 7.2 Hz, 3H). <sup>13</sup>C NMR (100 MHz, CDCl<sub>3</sub>): δ 160.1, 147.7, 140.8, 135.8, 133.8, 129.5, 129.1, 127.2, 126.8, 125.6, 119.2, 31.8, 31.3, 28.6, 27.9, 22.8, 22.6, 14.01, 14.00. IR (neat): 2955, 2926, 2857, 1617, 1597, 1556, 1502, 1460, 1425, 1377, 1304, 1138, 1110, 784, 754, 689 cm<sup>-1</sup>. HRMS (ESI-TOF) *m/z*: [M+H]<sup>+</sup> Calcd for C<sub>19</sub>H<sub>26</sub>N 268.2060; Found 268.2057.

When the reaction was carried out at 80 °C for 24 h using CuCl (10 mol%, 3.0 mg), PCy<sub>3</sub> (10 mol%, 8.4 mg), B<sub>2</sub>pin<sub>2</sub> (1.5 equiv., 114.3 mg), KO<sup>t</sup>Bu (1.5 equiv., 50.5 mg) and THF (1.5 mL), **4f** (0.3 mmol, 41.5 mg) and **2a** (0.45 mmol, 65.3 mg), the product **5f** was obtained in 44% yield (35.4 mg).

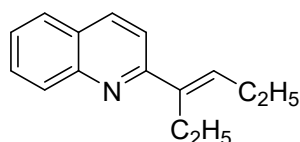

**5g**

**(E)-2-(Hex-3-en-3-yl)quinoline (5g)**. CuCl (10 mol%, 3.0 mg), PCy<sub>3</sub> (20 mol%, 16.8 mg), B<sub>2</sub>pin<sub>2</sub> (1.5 equiv., 114.3 mg), KO<sup>t</sup>Bu (1.5 equiv., 50.5 mg) and THF (1.5 mL), **4g** (2.0 equiv., 0.6 mmol, 49.3 mg) and **2a** (0.3 mmol, 43.5 mg) were stirred at 80 °C in an oil bath for 24 h. Purification by thin plate chromatography on silica gel (eluent: petroleum ether/ethyl acetate = 50/1) to afford the title product **5g** in 59% yield (37.2 mg) as a light yellow oil. <sup>1</sup>H NMR (400 MHz, CDCl<sub>3</sub>): δ 8.06 (d, *J* = 5.6 Hz, 1H), 8.04 (d, *J* = 6.0 Hz, 1H), 7.75 (d, *J* = 8.4 Hz, 1H), 7.66 (t, *J* = 8.0 Hz, 1H), 7.57 (d, *J* = 8.8 Hz, 1H), 7.45 (t, *J* = 7.2 Hz, 1H), 6.30 (t, *J* = 7.2 Hz, 1H), 2.81 (q, *J* = 7.2 Hz, 2H), 2.38-2.31 (m, 2H), 1.13 (t, *J* = 7.6 Hz, 3H), 1.08 (t, *J* = 7.6 Hz, 3H). <sup>13</sup>C NMR (100 MHz, CDCl<sub>3</sub>): δ 159.7, 147.8, 141.7, 135.8, 134.7, 129.5, 129.1, 127.2,

126.9, 125.6, 119.1, 22.0, 21.4, 14.2, 13.9. IR (neat): 2964, 2931, 2871, 1616, 1597, 1556, 1502, 1458, 1426, 1307, 1138, 787, 754, 693  $\text{cm}^{-1}$ . HRMS (ESI-TOF)  $m/z$ :  $[M+H]^+$  Calcd for  $\text{C}_{15}\text{H}_{18}\text{N}$  212.1434; Found 212.1438.

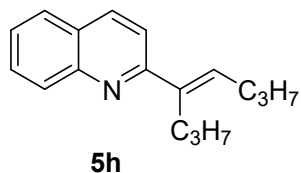

**(E)-2-(Oct-4-en-4-yl)quinoline (5h).** CuCl (10 mol%, 3.0 mg),  $\text{PCy}_3$  (20 mol%, 16.8 mg),  $\text{B}_2\text{pin}_2$  (1.5 equiv., 114.3 mg), KO<sup>t</sup>Bu (1.5 equiv., 50.5 mg) and THF (1.5 mL), **4h** (2.0 equiv., 0.6 mmol, 66.1 mg) and **2a** (0.3 mmol, 43.5 mg) were stirred at 80 °C in an oil bath for 24 h. Purification by thin plate chromatography on silica gel (eluent: petroleum ether/ethyl acetate = 50/1) to afford the title product **5h** in 49% yield (35.4 mg) as a light yellow oil.  $^1\text{H}$  NMR (400 MHz,  $\text{CDCl}_3$ ):  $\delta$  8.05 (t,  $J = 8.8$  Hz, 2H), 7.74 (d,  $J = 8.0$  Hz, 1H), 7.65 (t,  $J = 7.6$  Hz, 1H), 7.55 (d,  $J = 8.8$  Hz, 1H), 7.45 (t,  $J = 8.0$  Hz, 1H), 6.31 (t,  $J = 7.2$  Hz, 1H), 2.78 (t,  $J = 7.6$  Hz, 2H), 2.30 (q,  $J = 7.6$  Hz, 2H), 1.59-1.52 (m, 2H), 1.50-1.42 (m, 2H), 1.00 (t,  $J = 7.6$  Hz, 3H), 0.93 (t,  $J = 7.6$  Hz, 3H).  $^{13}\text{C}$  NMR (100 MHz,  $\text{CDCl}_3$ ):  $\delta$  160.1, 147.7, 140.8, 135.8, 133.8, 129.5, 129.1, 127.2, 126.8, 125.6, 119.2, 31.0, 30.3, 22.8, 22.2, 14.2, 14.1. IR (neat): 2957, 2929, 2869, 1616, 1597, 1555, 1503, 1456, 1425, 1377, 1304, 1216, 1138, 1107, 818, 753, 687  $\text{cm}^{-1}$ . HRMS (ESI-TOF)  $m/z$ :  $[M+H]^+$  Calcd for  $\text{C}_{17}\text{H}_{22}\text{N}$  240.1747; Found 240.1749.

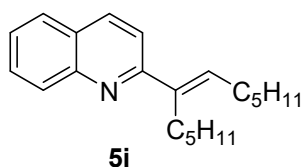

**(E)-2-(Dodec-6-en-6-yl)quinoline (5i).** CuCl (10 mol%, 3.0 mg),  $\text{PCy}_3$  (20 mol%, 16.8 mg),  $\text{B}_2\text{pin}_2$  (1.5 equiv., 114.3 mg), KO<sup>t</sup>Bu (1.5 equiv., 50.5 mg) and THF (1.5 mL), **4i** (2.0 equiv., 0.6 mmol, 99.8 mg) and **2a** (0.3 mmol, 43.5 mg) were stirred at 80 °C in an oil bath for 24 h. Purification by thin plate chromatography on silica gel (eluent: petroleum ether/ethyl acetate = 50/1) to afford the title product **5i** in 68% yield (60.4 mg) as a light yellow oil.  $^1\text{H}$  NMR (400 MHz,  $\text{CDCl}_3$ ):  $\delta$  8.05 (t,  $J = 7.2$  Hz, 2H), 7.74 (d,  $J = 8.0$  Hz, 1H), 7.65 (td,  $J = 6.8, 1.2$  Hz, 1H), 7.55 (d,  $J = 8.8$  Hz, 1H), 7.45 (td,  $J = 7.4, 1.2$  Hz, 1H), 6.30 (t,  $J = 7.2$  Hz, 1H), 2.78 (t,  $J = 7.2$  Hz, 2H), 2.31 (q,  $J = 7.2$  Hz, 2H), 1.53-1.28 (m, 12H), 0.91 (t,  $J = 6.8$  Hz, 3H), 0.86 (t,  $J = 7.2$  Hz, 3H).  $^{13}\text{C}$  NMR (100 MHz,  $\text{CDCl}_3$ ):  $\delta$  160.1, 147.8, 140.9, 135.8, 133.8, 129.5, 129.1, 127.2, 126.8, 125.6, 119.2, 31.9, 31.7, 29.3, 28.9, 28.7, 28.2, 22.6, 22.5, 14.05, 14.03. IR (neat):

2955, 2924, 2856, 1616, 1598, 1556, 1502, 1465, 1425, 1377, 1303, 1138, 1111, 823, 753, 729, 692  $\text{cm}^{-1}$ . HRMS (ESI-TOF)  $m/z$ :  $[M+H]^+$  Calcd for  $\text{C}_{21}\text{H}_{30}\text{N}$  296.2373; Found 296.2376.

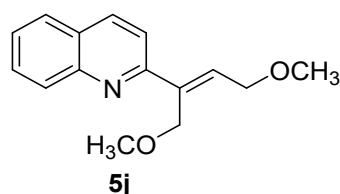

**(Z)-2-(1,4-Dimethoxybut-2-en-2-yl)quinoline (5j).** CuCl (10 mol%, 3.0 mg),  $\text{PCy}_3$  (20 mol%, 16.8 mg),  $\text{B}_2\text{pin}_2$  (1.5 equiv., 114.3 mg), KO<sup>t</sup>Bu (1.5 equiv., 50.5 mg) and THF (1.5 mL), **4j** (2.0 equiv., 0.6 mmol, 68.5 mg) and **2a** (0.3 mmol, 43.5 mg) were stirred at 80 °C in an oil bath for 24 h. Purification by thin plate chromatography on silica gel (eluent: petroleum ether/ethyl acetate = 10/1) to afford the title product **5j** in 68% yield (49.8 mg) as a yellow oil.  $^1\text{H}$  NMR (400 MHz,  $\text{CDCl}_3$ ):  $\delta$  8.08 (t,  $J$  = 8.8 Hz, 2H), 7.76 (d,  $J$  = 8.0 Hz, 1H), 7.69-7.64 (m, 2H), 7.48 (t,  $J$  = 7.2 Hz, 1H), 6.72 (t,  $J$  = 6.4 Hz, 1H), 4.68 (s, 2H), 4.37 (d,  $J$  = 6.0 Hz, 2H), 3.44 (s, 3H), 3.40 (s, 3H).  $^{13}\text{C}$  NMR (100 MHz,  $\text{CDCl}_3$ ):  $\delta$  157.4, 147.6, 138.6, 136.3, 134.1, 129.6, 129.3, 127.3, 127.1, 126.1, 118.9, 69.4, 67.9, 58.4, 58.1. IR (neat): 2980, 2924, 2818, 1617, 1596, 1556, 1503, 1450, 1427, 1376, 1227, 1190, 954, 910, 818, 786, 756  $\text{cm}^{-1}$ . HRMS (ESI-TOF)  $m/z$ :  $[M+H]^+$  Calcd for  $\text{C}_{15}\text{H}_{18}\text{NO}_2$  244.1332; Found 244.1336.

## Synthesis of products 5k-5t.

### Typical procedure for the synthesis of 5k.

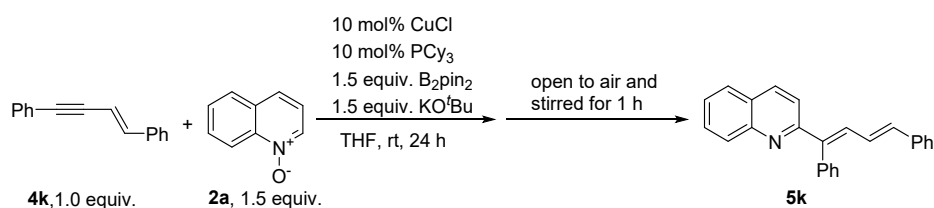

**2-((1E,3E)-1,4-Diphenylbuta-1,3-dien-1-yl)quinoline (5k).** In the nitrogen-filled glove box, CuCl (10 mol%, 3.0 mg),  $\text{PCy}_3$  (10 mol%, 8.4 mg),  $\text{B}_2\text{pin}_2$  (1.5 equiv., 114.3 mg), KO<sup>t</sup>Bu (1.5 equiv., 50.5 mg) and THF (1.5 mL) were added to screw-cap vial (4 mL). The solvent stirred at ambient temperature for 1 minute. Then **4k** (0.3 mmol, 61.3 mg) and **2a** (1.5 equiv., 65.3 mg) were added. The vial was sealed with a screw cap featuring a PTFE/silicone septum and taken outside the glove box. After the reaction mixture was stirred at room temperature for 24 h, then the mixture was stirred in air for 1 h. The mixture was filtered over a silica gel pad and washed with ethyl acetate. The solvent was evaporated under the reduced pressure. the residue was purified by column chromatography on silica gel (eluent: petroleum ether/ethyl acetate = 20/1)



to afford the corresponding product **5k** in 63% yield (63.5 mg) as a yellow oil. <sup>1</sup>H NMR (400 MHz, CDCl<sub>3</sub>): δ 8.15 (d, *J* = 8.4 Hz, 1H), 7.93 (d, *J* = 8.8 Hz, 1H), 7.84 (dd, *J* = 6.6, 3.2 Hz, 1H), 7.73-7.67 (m, 2H), 7.49-7.42 (m, 4H), 7.35 (t, *J* = 7.6 Hz, 4H), 7.26 (t, *J* = 6.8 Hz, 2H), 7.21-7.19 (m, 1H), 7.10 (d, *J* = 8.4 Hz, 1H), 6.96-6.94 (m, 2H). <sup>13</sup>C NMR (100 MHz, CDCl<sub>3</sub>): δ 158.2, 148.0, 141.6, 138.5, 137.3, 136.8, 135.8, 132.6, 130.6, 129.6, 129.5, 128.53, 128.49, 127.9, 127.7, 127.3, 127.1, 126.7, 126.5, 126.1, 121.1. IR (neat): 3055, 3029, 1735, 1594, 1580, 1546, 1497, 1424, 1371, 1226, 968, 829, 749, 690 cm<sup>-1</sup>. HRMS (ESI-TOF) *m/z*: [M+H]<sup>+</sup> Calcd for C<sub>25</sub>H<sub>20</sub>N 334.1590; Found 334.1592.

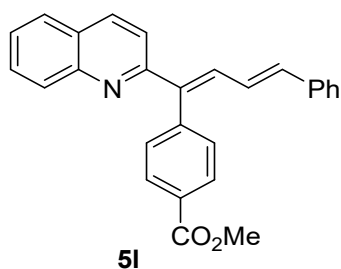

**Methyl 4-((1*E*,3*E*)-4-phenyl-1-(quinolin-2-yl)buta-1,3-dien-1-yl)benzoate (**5l**).** CuCl (10 mol%, 3.0 mg), PCy<sub>3</sub> (10 mol%, 8.4 mg), B<sub>2</sub>pin<sub>2</sub> (1.5 equiv., 114.3 mg), KO<sup>t</sup>Bu (1.5 equiv., 50.5 mg) and THF (1.5 mL), **4l** (0.3 mmol, 78.7 mg) and **2a** (1.5 equiv., 65.3 mg) were stirred at ambient temperature for 24 h, then the solvent stirred in air for 1 h. Purification by thin plate chromatography on silica gel (eluent: petroleum ether/ethyl acetate = 10/1) to afford the title product **5l** in 48% yield (55.9 mg) as a yellow oil. <sup>1</sup>H NMR (400 MHz, CDCl<sub>3</sub>): δ 8.16 (d, *J* = 7.6 Hz, 2H), 8.12 (d, *J* = 8.4 Hz, 1H), 7.99 (d, *J* = 8.4 Hz, 1H), 7.85 (d, *J* = 11.2 Hz, 1H), 7.76 (d, *J* = 8.0 Hz, 1H), 7.71 (t, *J* = 7.6 Hz, 1H), 7.50 (t, *J* = 7.6 Hz, 1H), 7.47-7.45 (m, 2H), 7.36-7.34 (m, 2H), 7.31-7.27 (m, 2H), 7.25-7.21 (m, 1H), 7.11 (d, *J* = 8.4 Hz, 1H), 7.01-6.98 (m, 1H), 6.92-6.88 (m, 1H), 3.98 (s, 3H). <sup>13</sup>C NMR (100 MHz, CDCl<sub>3</sub>): δ 167.0, 157.6, 148.1, 143.5, 140.6, 137.7, 137.0, 136.1, 133.3, 130.8, 129.8, 129.7, 129.6, 129.4, 128.6, 128.2, 127.4, 127.2, 126.8, 126.3, 125.9, 120.8, 52.2. IR (neat): 2949, 1721, 1596, 1579, 1545, 1497, 1436, 1425, 1272, 1229, 1175, 1100, 1017, 972, 963, 829, 729, 690 cm<sup>-1</sup>. HRMS (ESI-TOF) *m/z*: [M+H]<sup>+</sup> Calcd for C<sub>27</sub>H<sub>22</sub>NO<sub>2</sub> 392.1645; Found 392.1644.

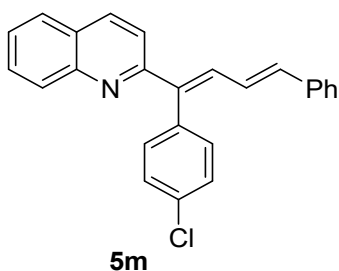

**2-((1E,3E)-1-(4-Chlorophenyl)-4-phenylbuta-1,3-dien-1-yl)quinoline (5m).** CuCl (10 mol%, 3.0 mg), PCy<sub>3</sub> (10 mol%, 8.4 mg), B<sub>2</sub>pin<sub>2</sub> (1.5 equiv., 114.3 mg), KO<sup>t</sup>Bu (1.5 equiv., 50.5 mg) and THF (1.5 mL), **4m** (0.3 mmol, 71.6 mg) and **2a** (1.5 equiv., 65.3 mg) were stirred at ambient temperature for 24 h, then the solvent stirred in air for 1 h. Purification by column chromatography on silica gel (eluent: petroleum ether/ethyl acetate = 30/1) to afford the title product **5m** in 53% yield (58.7 mg) as a yellow solid. <sup>1</sup>H NMR (400 MHz, CDCl<sub>3</sub>): δ 8.12 (d, *J* = 8.4 Hz, 1H), 7.95 (d, *J* = 8.4 Hz, 1H), 7.80 (d, *J* = 10.0 Hz, 1H), 7.73-7.66 (m, 2H), 7.48-7.43 (m, 3H), 7.35-7.33 (m, 2H), 7.28 (d, *J* = 7.6 Hz, 4H), 7.22-7.19 (m, 1H), 7.10 (d, *J* = 8.8 Hz, 1H), 6.98-6.85 (m, 2H). <sup>13</sup>C NMR (100 MHz, CDCl<sub>3</sub>): δ 157.7, 148.0, 140.3, 137.4, 137.0, 136.9, 136.0, 133.6, 133.0, 132.0, 129.7, 129.5, 128.7, 128.6, 128.1, 127.3, 127.1, 126.8, 126.2, 126.0, 120.7. IR (neat): 1592, 1578, 1544, 1488, 1424, 1369, 1228, 1133, 1101, 1087, 1014, 973, 963, 837, 825, 814, 744, 718, 688 cm<sup>-1</sup>. HRMS (ESI-TOF) *m/z*: [M+H]<sup>+</sup> Calcd for C<sub>25</sub>H<sub>19</sub>NCl 368.1201; Found 368.1193.

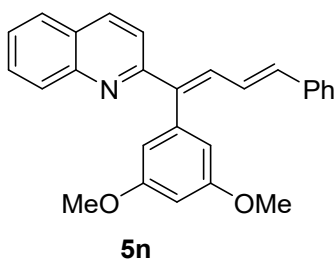

**2-((1E,3E)-1-(3,5-Dimethoxyphenyl)-4-phenylbuta-1,3-dien-1-yl)quinoline (5n).** CuCl (10 mol%, 3.0 mg), PCy<sub>3</sub> (10 mol%, 8.4 mg), B<sub>2</sub>pin<sub>2</sub> (1.5 equiv., 114.3 mg), KO<sup>t</sup>Bu (1.5 equiv., 50.5 mg) and THF (1.5 mL), **4n** (0.3 mmol, 79.3 mg) and **2a** (1.5 equiv., 65.3 mg) were stirred at ambient temperature for 24 h, then the solvent stirred in air for 1 h. Purification by thin plate chromatography on silica gel (eluent: petroleum ether/ethyl acetate = 10/1) to afford the title product **5n** in 69% yield (81.7 mg) as a yellow oil. <sup>1</sup>H NMR (400 MHz, CDCl<sub>3</sub>): δ 8.15 (d, *J* = 8.4 Hz, 1H), 7.95 (d, *J* = 8.8 Hz, 1H), 7.84 (d, *J* = 9.6 Hz, 1H), 7.74-7.68 (m, 2H), 7.46 (t, *J* = 7.6 Hz, 1H), 7.38-7.36 (m, 2H), 7.27 (t, *J* = 7.6 Hz, 2H), 7.21 (d, *J* = 7.2 Hz, 1H), 7.15 (d, *J* = 8.8 Hz, 1H), 6.99-6.97 (m, 2H), 6.55-6.53 (m, 3H), 3.79 (s, 6H). <sup>13</sup>C NMR (100 MHz, CDCl<sub>3</sub>):

$\delta$  160.9, 157.9, 148.0, 141.3, 140.5, 137.2, 136.9, 135.9, 132.5, 129.6, 129.4, 128.5, 127.9, 127.3, 127.2, 126.8, 126.4, 126.0, 121.2, 108.5, 99.9, 55.3. IR (neat): 2957, 2922, 2849, 1736, 1547, 1501, 1448, 1419, 1373, 1317, 1272, 1253, 1226, 1204, 1193, 1152, 1058, 969, 895, 875, 862, 821, 786, 712, 691  $\text{cm}^{-1}$ . HRMS (ESI-TOF)  $m/z$ :  $[\text{M}+\text{H}]^+$  Calcd for  $\text{C}_{27}\text{H}_{24}\text{NO}_2$  394.1802; Found 394.1798.

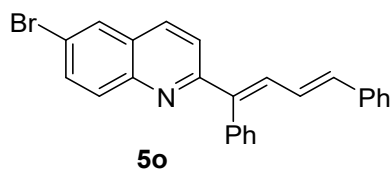

**6-Bromo-2-((1E,3E)-1,4-diphenylbuta-1,3-dien-1-yl)quinoline (5o).** CuCl (10 mol%, 3.0 mg),  $\text{PCy}_3$  (10 mol%, 8.4 mg),  $\text{B}_2\text{pin}_2$  (1.5 equiv., 114.3 mg), KO<sup>t</sup>Bu (1.5 equiv., 50.5 mg) and THF (1.5 mL), **4k** (0.3 mmol, 61.3 mg) and **2c** (1.5 equiv., 100.8 mg) were stirred at ambient temperature for 24 h, then the solvent stirred in air for 1 h. Purification by thin plate chromatography on silica gel (eluent: petroleum ether/ethyl acetate = 10/1) to afford the title product **5o** in 66% yield (82.0 mg) as a yellow oil.  $^1\text{H}$  NMR (400 MHz,  $\text{CDCl}_3$ ):  $\delta$  7.98 (d,  $J$  = 9.2 Hz, 1H), 7.85-7.80 (m, 3H), 7.73 (dd,  $J$  = 9.2, 2.0 Hz, 1H), 7.49-7.40 (m, 3H), 7.33 (d,  $J$  = 8.0 Hz, 4H), 7.26 (t,  $J$  = 6.8 Hz, 2H), 7.22-7.17 (m, 1H), 7.10 (d,  $J$  = 8.8 Hz, 1H), 6.98-6.87 (m, 2H).  $^{13}\text{C}$  NMR (100 MHz,  $\text{CDCl}_3$ ):  $\delta$  158.5, 146.6, 141.1, 138.1, 137.2, 137.1, 134.8, 133.01, 132.96, 131.2, 130.6, 129.3, 128.6, 128.1, 128.0, 127.7, 126.8, 126.3, 121.8, 119.8. IR (neat): 1735, 1591, 1578, 1538, 1483, 1441, 1371, 1294, 1241, 1222, 1186, 1072, 1057, 969, 877, 827, 785, 769, 749, 690  $\text{cm}^{-1}$ . HRMS (ESI-TOF)  $m/z$ :  $[\text{M}+\text{H}]^+$  Calcd for  $\text{C}_{25}\text{H}_{19}\text{NBr}$  412.0695; Found 412.0697.

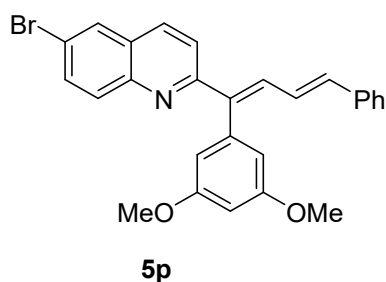

**6-Bromo-2-((1E,3E)-1-(3,5-dimethoxyphenyl)-4-phenylbuta-1,3-dien-1-yl)quinoline (5p).** CuCl (10 mol%, 3.0 mg),  $\text{PCy}_3$  (10 mol%, 8.4 mg),  $\text{B}_2\text{pin}_2$  (1.5 equiv., 114.3 mg), KO<sup>t</sup>Bu (1.5 equiv., 50.5 mg) and THF (1.5 mL), **4n** (0.3 mmol, 79.3 mg) and **2c** (1.5 equiv., 100.8 mg) were stirred at ambient temperature for 24 h, then the solvent stirred in air for 1 h. Purification by column chromatography on silica gel (eluent: petroleum ether/ethyl acetate = 30/1) to afford

the title product **5p** in 47% yield (66.1 mg) as a yellow solid.  $^1\text{H}$  NMR (400 MHz,  $\text{CDCl}_3$ ):  $\delta$  7.98 (d,  $J = 9.2$  Hz, 1H), 7.87-7.83 (m, 3H), 7.74 (d,  $J = 8.8$  Hz, 1H), 7.37-7.35 (m, 2H), 7.27 (t,  $J = 7.6$  Hz, 2H), 7.21 (d,  $J = 6.8$  Hz, 1H), 7.15 (d,  $J = 8.8$  Hz, 1H), 6.97-6.95 (m, 2H), 6.55 (s, 1H), 6.50 (s, 2H), 3.79 (s, 6H).  $^{13}\text{C}$  NMR (100 MHz,  $\text{CDCl}_3$ ):  $\delta$  160.9, 158.1, 146.6, 141.0, 140.2, 137.3, 137.1, 134.8, 132.93, 132.89, 131.2, 129.3, 128.6, 128.2, 128.0, 126.8, 126.3, 121.9, 119.7, 108.4, 99.9, 55.4. IR (neat): 2992, 2931, 2833, 1603, 1590, 1488, 1458, 1421, 1364, 1316, 1272, 1253, 1195, 1060, 974, 941, 895, 881, 829, 810, 773, 746, 709, 690  $\text{cm}^{-1}$ . HRMS (ESI-TOF)  $m/z$ :  $[\text{M}+\text{H}]^+$  Calcd for  $\text{C}_{27}\text{H}_{23}\text{NO}_2\text{Br}$  472.0907; Found 472.0907.

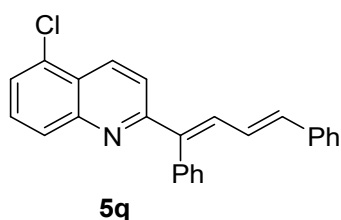

**5-Chloro-2-((1E,3E)-1,4-diphenylbuta-1,3-dien-1-yl)quinoline (5q).** CuCl (10 mol%, 3.0 mg),  $\text{PCy}_3$  (10 mol%, 8.4 mg),  $\text{B}_2\text{pin}_2$  (1.5 equiv., 114.3 mg), KO $^t$ Bu (1.5 equiv., 50.5 mg) and THF (1.5 mL), **4k** (0.3 mmol, 61.3 mg) and **2d** (1.5 equiv., 80.8 mg) were stirred at ambient temperature for 24 h, then the solvent stirred in air for 1 h. Purification by thin plate chromatography on silica gel (eluent: petroleum ether/ethyl acetate = 10/1) to afford the title product **5q** in 62% yield (68.1 mg) as a yellow oil.  $^1\text{H}$  NMR (400 MHz,  $\text{CDCl}_3$ ):  $\delta$  8.33 (d,  $J = 8.8$  Hz, 1H), 8.04 (d,  $J = 8.4$  Hz, 1H), 7.86 (dd,  $J = 8.6, 1.6$  Hz, 1H), 7.57 (t,  $J = 7.6$  Hz, 1H), 7.52-7.42 (m, 4H), 7.35-7.32 (m, 4H), 7.26 (t,  $J = 7.2$  Hz, 2H), 7.21-7.17 (m, 2H), 6.95-6.93 (m, 2H).  $^{13}\text{C}$  NMR (100 MHz,  $\text{CDCl}_3$ ):  $\delta$  158.8, 148.7, 141.0, 138.1, 137.4, 137.1, 133.3, 132.7, 131.1, 130.6, 129.2, 128.7, 128.6, 128.5, 128.0, 127.8, 126.8, 126.3, 125.9, 125.1, 121.8. IR (neat): 1736, 1576, 1543, 1492, 1442, 1391, 1371, 1236, 1195, 1123, 1046, 959, 832, 761, 748, 690, 673  $\text{cm}^{-1}$ . HRMS (ESI-TOF)  $m/z$ :  $[\text{M}+\text{H}]^+$  Calcd for  $\text{C}_{25}\text{H}_{19}\text{NCl}$  368.1201; Found 368.1206.

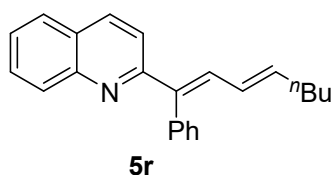

**2-((1E,3E)-1-phenylocta-1,3-dien-1-yl)quinoline (5r).** CuCl (10 mol%, 3.0 mg),  $\text{PCy}_3$  (10 mol%, 8.4 mg),  $\text{B}_2\text{pin}_2$  (1.5 equiv., 114.3 mg), KO $^t$ Bu (1.5 equiv., 50.5 mg) and THF (1.5 mL), **4o** (0.3 mmol, 55.3 mg) and **2a** (1.5 equiv., 65.3 mg) were stirred at ambient temperature for

24 h, then the solvent stirred in air for 1 h. Purification by thin plate chromatography on silica gel (eluent: petroleum ether/ethyl acetate = 50/1) to afford the title product **5r** in 23% yield (21.9 mg) as a yellow oil. <sup>1</sup>H NMR (400 MHz, CDCl<sub>3</sub>): δ 8.11 (d, *J* = 8.8 Hz, 1H), 7.93 (d, *J* = 8.8 Hz, 1H), 7.72 (d, *J* = 8.0 Hz, 1H), 7.68 (td, *J* = 6.8, 1.2 Hz, 1H), 7.61 (d, *J* = 10.4 Hz, 1H), 7.48-7.43 (m, 3H), 7.40-7.36 (m, 1H), 7.32-7.30 (m, 2H), 7.06 (d, *J* = 8.8 Hz, 1H), 6.23-6.10 (m, 2H), 2.11 (q, *J* = 6.8 Hz, 2H), 1.40-1.26 (m, 4H), 0.88 (t, *J* = 6.8 Hz, 3H). <sup>13</sup>C NMR (100 MHz, CDCl<sub>3</sub>): δ 158.7, 148.0, 140.9, 138.9, 138.8, 135.7, 133.0, 130.6, 129.52, 129.45, 128.4, 128.0, 127.3, 127.0, 125.9, 121.0, 32.9, 31.4, 22.2, 13.9. IR (neat): 2957, 2927, 2872, 1738, 1596, 1584, 1548, 1501, 1442, 1372, 1238, 1046, 976, 911, 779, 757, 700 cm<sup>-1</sup>. HRMS (ESI-TOF) *m/z*: [M+H]<sup>+</sup> Calcd for C<sub>23</sub>H<sub>24</sub>N 314.1903; Found 314.1897.

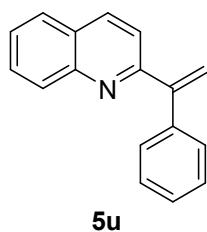

**2-(1-Phenylvinyl)quinoline (5u).** CuCl (10 mol%, 3.0 mg), PCy<sub>3</sub> (10 mol%, 8.4 mg), B<sub>2</sub>pin<sub>2</sub> (1.5 equiv., 114.3 mg), KO<sup>t</sup>Bu (1.5 equiv., 50.5 mg) and THF (1.5 mL), phenylacetylene (0.3 mmol, 30.6 mg) and **2a** (1.5 equiv., 65.3 mg) were stirred at 80 °C in an oil bath for 24 h. Purification by column chromatography on silica gel (eluent: petroleum ether/ethyl acetate = 30/1) to afford the title product **5u** in 33% yield (23.1 mg) as a yellow oil. <sup>1</sup>H NMR (400 MHz, CDCl<sub>3</sub>): δ 8.15 (d, *J* = 8.4 Hz, 1H), 8.08 (d, *J* = 8.8 Hz, 1H), 7.80 (d, *J* = 8.4 Hz, 1H), 7.72 (td, *J* = 7.6, 1.6 Hz, 1H), 7.53 (td, *J* = 7.6, 0.8 Hz, 1H), 7.42-7.35 (m, 6H), 6.11 (d, *J* = 1.2 Hz, 1H), 5.77 (d, *J* = 1.2 Hz, 1H). <sup>13</sup>C NMR (100 MHz, CDCl<sub>3</sub>): δ 158.8, 149.5, 147.9, 140.0, 136.0, 129.7, 129.5, 128.4, 128.3, 127.9, 127.4, 127.3, 126.4, 121.2, 118.8. The spectroscopic data are in agreement with that previously reported.<sup>7</sup>

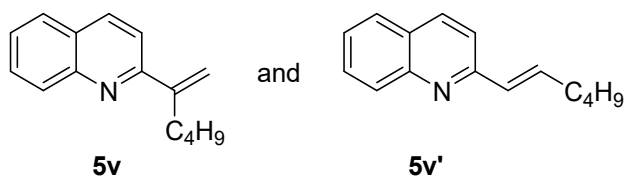

**2-(Hex-1-en-2-yl)quinoline (5v).** CuCl (10 mol%, 3.0 mg), PCy<sub>3</sub> (10 mol%, 8.4 mg), B<sub>2</sub>pin<sub>2</sub> (1.5 equiv., 114.3 mg), KO<sup>t</sup>Bu (1.5 equiv., 50.5 mg) and THF (1.5 mL), hex-1-yne (0.3 mmol, 24.6 mg) and **2a** (1.5 equiv., 65.3 mg) were stirred at 80 °C in an oil bath for 24 h. Purification by column chromatography on silica gel (eluent: petroleum ether/ethyl acetate = 20/1) to afford

the title product **5v** in 32% yield (20.3 mg) followed by **5v'** in 4% yield (2.5 mg). **For the characterization of 5v:** A light yellow oil. <sup>1</sup>H NMR (400 MHz, CDCl<sub>3</sub>): δ 8.08 (d, *J* = 8.4 Hz, 2H), 7.77 (d, *J* = 8.0 Hz, 1H), 7.68 (td, *J* = 7.6, 0.8 Hz, 1H), 7.62 (d, *J* = 8.8 Hz, 1H), 7.49 (td, *J* = 7.6, 0.8 Hz, 1H), 5.83 (s, 1H), 5.42 (d, *J* = 1.2 Hz, 1H), 2.79 (t, *J* = 7.6 Hz, 2H), 1.58-1.51 (m, 2H), 1.46-1.37 (m, 2H), 0.93 (t, *J* = 7.2 Hz, 3H). <sup>13</sup>C NMR (100 MHz, CDCl<sub>3</sub>): δ 158.7, 149.3, 147.7, 135.9, 129.7, 129.3, 127.3, 127.1, 126.1, 118.9, 116.1, 33.4, 30.7, 22.5, 14.0. IR (neat): 2954, 2926, 2858, 1617, 1597, 1503, 1461, 1425, 1139, 1111, 901, 831, 761, 721, 618, 477 cm<sup>-1</sup>. HRMS (ESI-TOF) *m/z*: [M+H]<sup>+</sup> Calcd for C<sub>15</sub>H<sub>18</sub>N 212.1434; Found 212.1430.

**For the characterization of (*E*)-2-(hex-1-en-1-yl)quinoline (5v')**: A light yellow oil. <sup>1</sup>H NMR (400 MHz, CDCl<sub>3</sub>): δ 8.07 (d, *J* = 8.4 Hz, 1H), 8.03 (d, *J* = 8.8 Hz, 1H), 7.76 (d, *J* = 8.0 Hz, 1H), 7.68 (t, *J* = 7.2 Hz, 1H), 7.54 (d, *J* = 8.8 Hz, 1H), 7.47 (t, *J* = 7.2 Hz, 1H), 6.87-6.80 (m, 1H), 6.72 (d, *J* = 16.4 Hz, 1H), 2.34 (q, *J* = 6.8 Hz, 2H), 1.58-1.51 (m, 2H), 1.46-1.37 (m, 2H), 0.95 (t, *J* = 7.2 Hz, 3H). The spectroscopic data are in agreement with that previously reported.<sup>8</sup>

#### 1 mmol scale reaction for the formation of 5a.

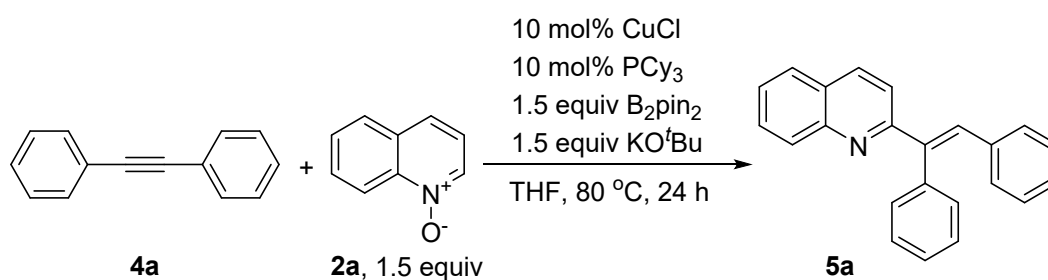

In the nitrogen-filled glove box, CuCl (10 mol%, 9.9 mg), PCy<sub>3</sub> (10 mol%, 28.0 mg), B<sub>2</sub>pin<sub>2</sub> (1.5 equiv., 380.9 mg), KO<sup>t</sup>Bu (1.5 equiv., 168.3 mg) and THF (4 mL) were added to a screw-cap vial (12 mL). The solvent stirred at ambient temperature for 1 minute. Then 1,2-diphenylethyne **4a** (1 mmol, 178.2 mg) and **2a** (1.5 equiv., 217.7 mg) were added. The vial was taken outside the glove box and immersed into an oil bath preheated at 80 °C. After the reaction mixture was stirred for 24 h, the mixture was filtered over a silica gel pad and washed with ethyl acetate. The solvent was evaporated under the reduced pressure. the residue was purified by column chromatography on silica gel (eluent: petroleum ether/ethyl acetate = 20/1) to afford the corresponding product **5a** in 87% yield (267.4 mg) as a yellow oil.

#### Mechanistic studies.

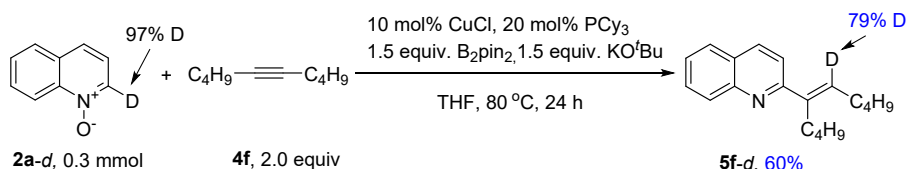

**(E)-2-(Dec-5-en-5-yl-6-d)quinoline (5f-d).** The reaction was conducted in an oven-dried screw-cap vial (volume: 4 mL) equipped with a magnetic stir bar. In a nitrogen-filled glove box, CuCl (10 mol%, 3.0 mg), PCy<sub>3</sub> (20 mol%, 16.8 mg), B<sub>2</sub>pin<sub>2</sub> (1.5 equiv., 114.3 mg), KO<sup>t</sup>Bu (1.5 equiv., 50.5 mg) and THF (1.5 mL) was added. The solvent stirred at ambient temperature for 1 minute. Then **4f** (2.0 equiv., 83.0 mg) and **2a-d** (0.3 mmol, 43.9 mg) were added. The vial was taken outside the glove box and immersed into an oil bath preheated at 80 °C. After stirring for 24 h, the mixture was cooled down to room temperature, filtered through a short pad of silica gel and washed with ethyl acetate. The organic solvent was evaporated under the reduced pressure and the residue was purified by thin plate chromatography on silica gel (eluent: petroleum ether/ethyl acetate = 50/1) afford the desired product **5f-d** in 60% yield (48.1 mg) with 79% deuterium incorporation as a light yellow oil. <sup>1</sup>H NMR (400 MHz, CDCl<sub>3</sub>): δ 8.06 (d, *J* = 8.8 Hz, 1H), 8.02 (d, *J* = 8.4 Hz, 1H), 7.73 (d, *J* = 7.6 Hz, 1H), 7.64 (t, *J* = 8.0 Hz, 1H), 7.54 (d, *J* = 8.8 Hz, 1H), 7.43 (t, *J* = 8.0 Hz, 1H), 6.30 (t, *J* = 7.2 Hz, 0.21H), 2.80 (t, *J* = 6.8 Hz, 2H), 2.32 (t, *J* = 6.8 Hz, 2H), 1.53-1.32 (m, 8H), 0.94 (t, *J* = 7.2 Hz, 3H), 0.89 (t, *J* = 6.8 Hz, 3H). IR (neat): 2955, 2926, 2857, 1616, 1597, 1555, 1502, 1457, 1424, 1377, 1138, 1108, 828, 759. HRMS (ESI-TOF) *m/z*: [M]<sup>+</sup> Calcd for C<sub>19</sub>H<sub>24</sub>DN 268.2044; Found 268.2044.

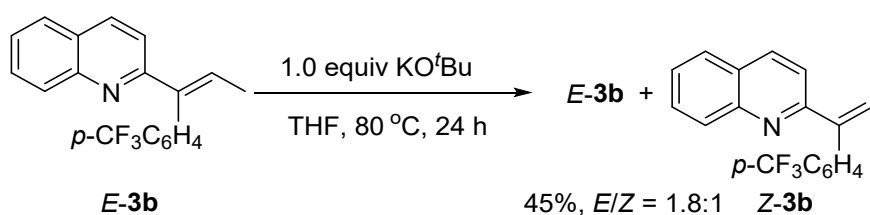

The reaction was conducted in an oven-dried screw-cap vial (volume: 4 mL) equipped with a magnetic stir bar. In a nitrogen-filled glove box, **E-3b** (0.1 mmol, 31.3 mg), KO<sup>t</sup>Bu (0.1 mmol, 11.2 mg) and THF (1 mL) were added sequentially to a screw-cap vial. The vial was sealed with a screw cap featuring a PTFE/silicone septum and taken outside the glove box. The reaction mixture was stirred in an oil bath preheated at 80 °C (oil bath) for 24 h. The mixture was cooled down to room temperature, filtered through a pad of silica gel and washed with ethyl acetate. The solvent was evaporated under the reduced pressure and the yields were determined by <sup>1</sup>H NMR using 1,3,5-trimethylbenzene (1.0 equiv., 12.0 mg) as the internal standard.

### Detection of BpinOBpin species.

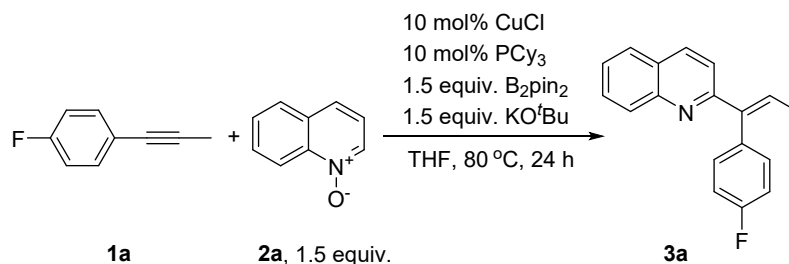

In the nitrogen-filled glove box, CuCl (10 mol%, 3.0 mg), PCy<sub>3</sub> (10 mol%, 8.4 mg), B<sub>2</sub>pin<sub>2</sub> (1.5 equiv., 114.3 mg), KO<sup>t</sup>Bu (1.5 equiv., 50.5 mg) and THF (1.5 mL) were added to screw-cap vial (4 mL). The mixture was stirred at room temperature for 1 minute. Then **1a** (0.3 mmol, 40.2 mg) and **2a** (1.5 equiv., 65.3 mg) were added. The vial was sealed with a screw cap featuring a PTFE/silicone septum and taken outside the glove box. After the reaction mixture was stirred in an oil bath preheated at 80 °C (oil bath) for 24 h, the mixture was filtered over celite and washed with ethyl acetate. The solvent was evaporated under the reduced pressure. The crude product was dissolved in CDCl<sub>3</sub> and analyzed by <sup>11</sup>B-NMR (128.4 MHz) spectroscopy (see **Spectra C** underneath). <sup>11</sup>B-NMR analysis of the crude reaction mixture showed that the peak at 22.6 ppm could be assigned to be BpinOBpin by comparison with a <sup>11</sup>B-NMR spectrum (see **spectra B**) of a sample of BpinOBpin prepared according to a literature procedure.<sup>9</sup>

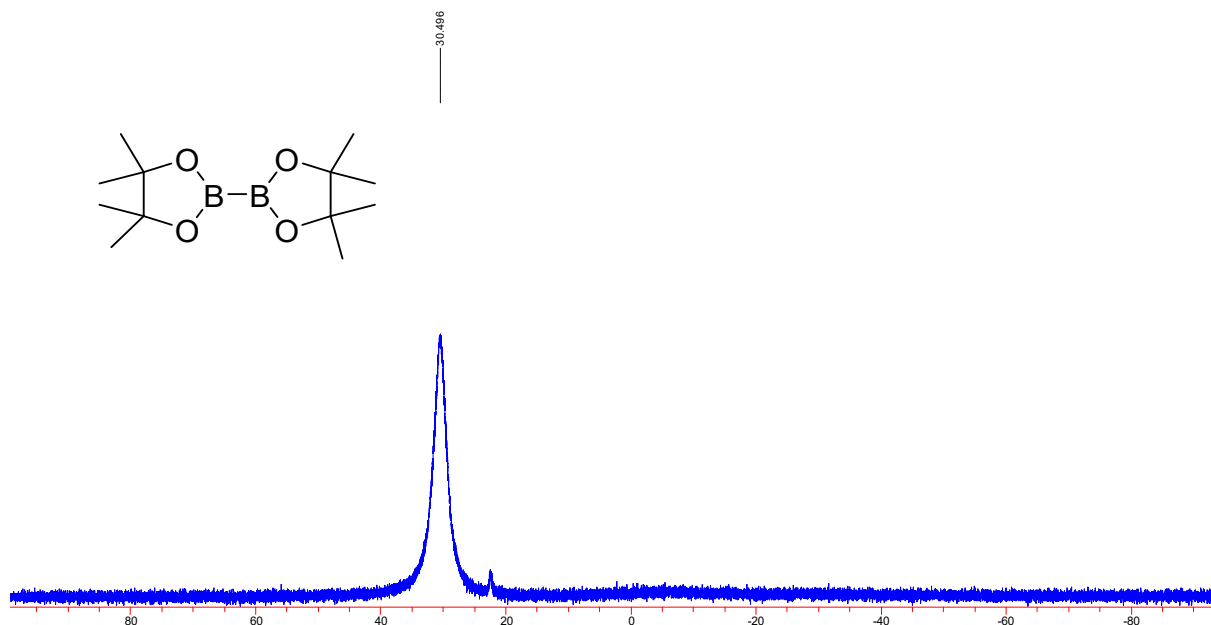

**Spectra A:** <sup>11</sup>B-NMR spectra (in CDCl<sub>3</sub>) of the B<sub>2</sub>pin<sub>2</sub>



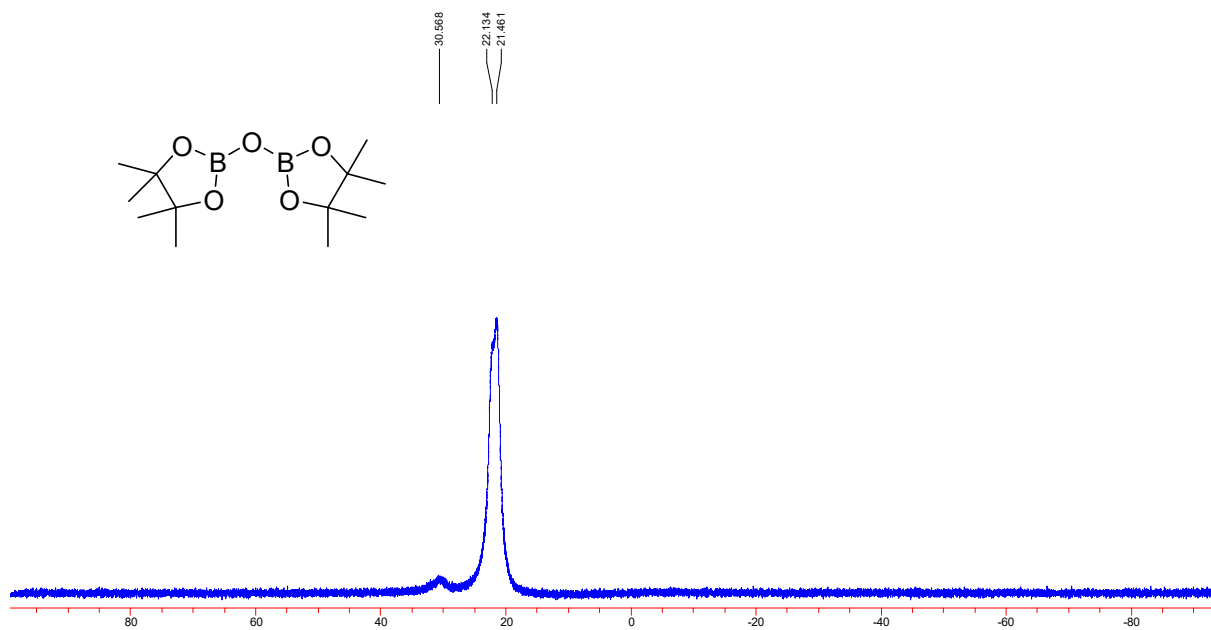

**Spectra B:** <sup>11</sup>B-NMR spectra (in CDCl<sub>3</sub>) of the BpinOBpin obtained according to a literature procedure.<sup>9</sup>

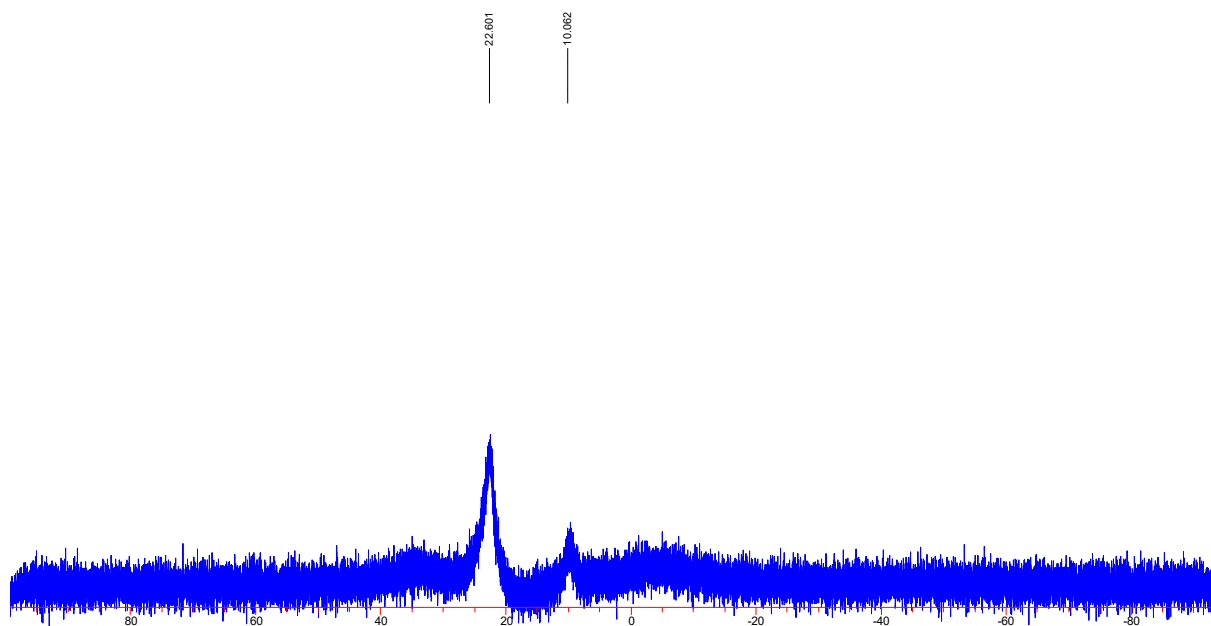

**Spectra C:** <sup>11</sup>B-NMR spectra (in CDCl<sub>3</sub>) of the crude reaction mixture

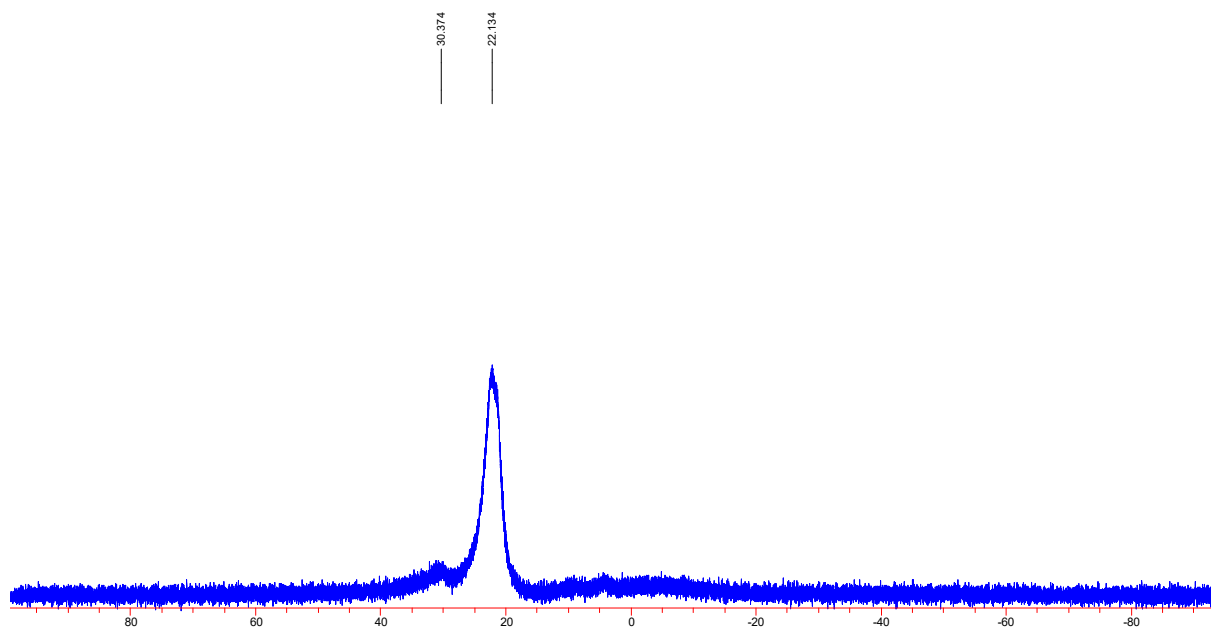

**Spectra D:** <sup>11</sup>B-NMR spectra (in CDCl<sub>3</sub>) of a sample obtained by combining the crude reaction mixture and BpinOBpin

#### Reference:

- (1) (a) H.-C Chiu and I. A. Tonks. Trimethylsilyl-Protected Alkynes as Selective Cross-Coupling Partners in Titanium-Catalyzed [2+2+1] Pyrrole Synthesis, *Angew. Chem. Int. Ed.*, 2018, **57**, 6090-6094. (b) T. Igarashi, E. Tayama, H. Iwamoto and E. Hasegawa. Carbon-carbon Bond Formation via Benzoyl Umpolung attained by Photoinduced Electron-Transfer with Benzimidazolines, *Tetrahedron Lett.*, 2013, **54**, 6874-6877.
- (2) (a) Y. Gao, G. Wu, Q. Zhou and J. Wang. Palladium-Catalyzed Oxygenative Cross-Coupling of Ynamides and Benzyl Bromides by Carbene Migratory Insertion, *Angew. Chem. Int. Ed.*, 2018, **57**, 2716-2720. (b) A. K. Dhiman, S. S. Gupta, R. Sharma, R. Kumar and U. Sharma. Rh(III)-Catalyzed C(8)-H Activation of Quinoline *N*-Oxides: Regioselective C-Br and C-N Bond Formation, *J. Org. Chem.*, 2019, **84**, 12871-12880.
- (3) W. Jo, J. Kim, S. Choi and S. H. Cho. Transition-Metal-Free Regioselective Alkylation of Pyridine *N*-Oxides Using 1,1-Diborylalkanes as Alkylating Reagents, *Angew. Chem. Int. Ed.*, 2016, **55**, 9690-9694.
- (4) Y. Xu, J. Zhao, H. Chen, W. Wu and H. Jiang. A Convenient Regioselective Synthesis of Cyclopentadienones via Palladium-Catalyzed [2+2+1] Cyclocarbonylation of Alkynes, *Chem. Commun.*, 2014, **50**, 2488-2490.
- (5) (a) M. Atsunori, S. Tomohiro, K. Tatsuhiro and S. Akitoshi. A Highly Effective Pd/Cu-

Catalyzed Coupling Reaction of Terminal Alkynes with Organic Halides Promoted by Tetrabutylammonium Fluoride or Hydroxide, *Syn. Lett.*, 2001, **5**, 649. (b) W. Li, S. Yu, J. Li and Y. Zhao. Nickel-Catalyzed Allylmethylation of Alkynes with Allylic Alcohols and AlMe<sub>3</sub>: Facile Access to Skipped Dienes and Trienes, *Angew. Chem. Int. Ed.*, 2020, **59**, 14404-14408. (c) Y. Zhang, B. Yu, B. Gao, T. Zhang and H. Huang. Triple-Bond Insertion Triggers Highly Regioselective 1,4-Aminomethylation of 1,3-Enynes with Aminals Enabled by Pd-Catalyzed C–N Bond Activation, *Org. Lett.*, 2019, **21**, 535-539.

- (6) J. Park, Y. Lee, J. Kim and S. H. Cho. Copper-Catalyzed Diastereoselective Addition of Diborylmethane to *N*-tert-Butanesulfinyl Aldimines: Synthesis of  $\beta$ -Aminoboronates, *Org. Lett.*, 2016, **18**, 1210-1213.
- (7) H. Hu, X. Hu and Y. Liu, Copper-Catalyzed ortho-Functionalization of Quinoline *N*-Oxides with Vinyl Arenes, *Angew. Chem. Int. Ed.*, 2020, **59**, 18975-18979.
- (8) K. L. Wilson, J. Murray, C. Jamieson and A. J. B. Watson. Cyrene as a Bio-Based Solvent for the Suzuki–Miyaura Cross-Coupling, *Synlett.*, 2018, **29**, 650-654.
- (9) D. P. Ojha, K. Gadde and K. R. Prabhu. Generation of Hydrogen from Water: A Pd-Catalyzed Reduction of Water Using Diboron Reagent at Ambient Conditions. *Org. Lett.*, 2016, **18**, 5062-5065.

### X-ray crystal structure of compound *E-3b* and **5m**

The single crystal of *E-3b* was prepared by slow evaporation of its solution in methyl acetate/hexane. The structure of *E-3b* was established by X-ray analysis of its crystal (Figure S1). Thermal ellipsoids are set at 30% probability.

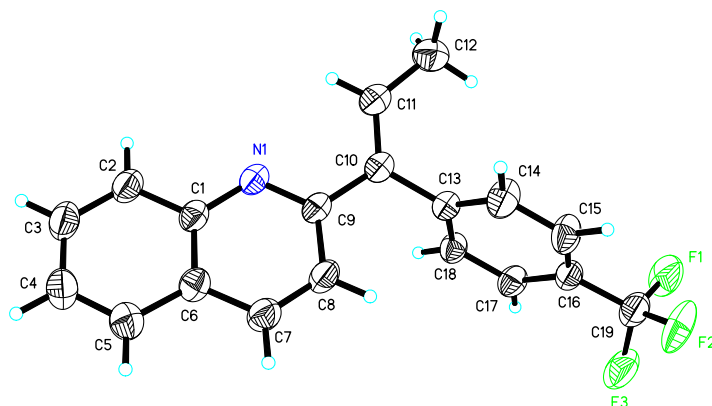

**Figure S1.** X-ray crystal structure of compound *E-3b*

Crystal data and structure refinement for mo\_d8v21734\_0m.

|                                   |                                                  |                  |
|-----------------------------------|--------------------------------------------------|------------------|
| Identification code               | mo_d8v21734_0m                                   |                  |
| Empirical formula                 | C <sub>19</sub> H <sub>14</sub> F <sub>3</sub> N |                  |
| Formula weight                    | 313.31                                           |                  |
| Temperature                       | 293(2) K                                         |                  |
| Wavelength                        | 0.71073 Å                                        |                  |
| Crystal system                    | Triclinic                                        |                  |
| Space group                       | P -1                                             |                  |
| Unit cell dimensions              | a = 7.9625(17) Å                                 | α = 110.688(6)°. |
|                                   | b = 10.485(2) Å                                  | β = 108.613(6)°. |
|                                   | c = 10.629(2) Å                                  | γ = 90.576(6)°.  |
| Volume                            | 779.1(3) Å <sup>3</sup>                          |                  |
| Z                                 | 2                                                |                  |
| Density (calculated)              | 1.336 Mg/m <sup>3</sup>                          |                  |
| Absorption coefficient            | 0.103 mm <sup>-1</sup>                           |                  |
| F(000)                            | 324                                              |                  |
| Crystal size                      | 0.180 x 0.150 x 0.110 mm <sup>3</sup>            |                  |
| Theta range for data collection   | 2.726 to 24.997°.                                |                  |
| Index ranges                      | -9 ≤ h ≤ 9, -12 ≤ k ≤ 12, -12 ≤ l ≤ 12           |                  |
| Reflections collected             | 18061                                            |                  |
| Independent reflections           | 2717 [R(int) = 0.0322]                           |                  |
| Completeness to theta = 25.242°   | 96.2 %                                           |                  |
| Absorption correction             | Semi-empirical from equivalents                  |                  |
| Max. and min. transmission        | 0.7456 and 0.6918                                |                  |
| Refinement method                 | Full-matrix least-squares on F <sup>2</sup>      |                  |
| Data / restraints / parameters    | 2717 / 42 / 237                                  |                  |
| Goodness-of-fit on F <sup>2</sup> | 1.030                                            |                  |
| Final R indices [I > 2σ(I)]       | R1 = 0.0462, wR2 = 0.1143                        |                  |
| R indices (all data)              | R1 = 0.0573, wR2 = 0.1251                        |                  |
| Extinction coefficient            | 0.13(2)                                          |                  |
| Largest diff. peak and hole       | 0.141 and -0.174 e.Å <sup>-3</sup>               |                  |

The single crystal of **5a** was prepared by slow evaporation of its solution in dichloromethane/hexane. The structure of **5m** was established by X-ray analysis of its crystal (Figure S2). Thermal ellipsoids are set at 30% probability.

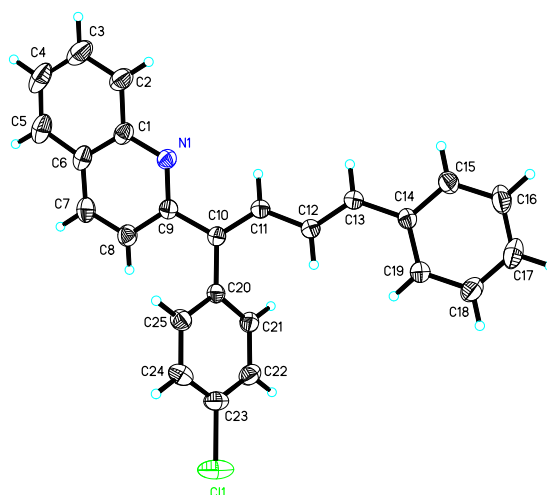

**Figure S2.** X-ray crystal structure of compound **5m**

Crystal data and structure refinement for mo\_d8v21850\_0m.

|                                 |                                             |                   |
|---------------------------------|---------------------------------------------|-------------------|
| Identification code             | mo_d8v21850_0m                              |                   |
| Empirical formula               | C <sub>25</sub> H <sub>18</sub> Cl N        |                   |
| Formula weight                  | 367.85                                      |                   |
| Temperature                     | 293(2) K                                    |                   |
| Wavelength                      | 0.71073 Å                                   |                   |
| Crystal system                  | Triclinic                                   |                   |
| Space group                     | P -1                                        |                   |
| Unit cell dimensions            | a = 7.8258(2) Å                             | α = 89.6410(10)°. |
|                                 | b = 9.6147(3) Å                             | β = 78.9490(10)°. |
|                                 | c = 13.4508(4) Å                            | γ = 77.7140(10)°. |
| Volume                          | 969.93(5) Å <sup>3</sup>                    |                   |
| Z                               | 2                                           |                   |
| Density (calculated)            | 1.260 Mg/m <sup>3</sup>                     |                   |
| Absorption coefficient          | 0.205 mm <sup>-1</sup>                      |                   |
| F(000)                          | 384                                         |                   |
| Crystal size                    | 0.200 x 0.150 x 0.110 mm <sup>3</sup>       |                   |
| Theta range for data collection | 2.708 to 25.999°.                           |                   |
| Index ranges                    | -9 ≤ h ≤ 9, -11 ≤ k ≤ 11, -16 ≤ l ≤ 16      |                   |
| Reflections collected           | 24173                                       |                   |
| Independent reflections         | 3791 [R(int) = 0.0327]                      |                   |
| Completeness to theta = 25.242° | 99.3 %                                      |                   |
| Absorption correction           | Semi-empirical from equivalents             |                   |
| Max. and min. transmission      | 0.7456 and 0.6726                           |                   |
| Refinement method               | Full-matrix least-squares on F <sup>2</sup> |                   |
|                                 | S37                                         |                   |

|                                      |                                    |
|--------------------------------------|------------------------------------|
| Data / restraints / parameters       | 3791 / 0 / 245                     |
| Goodness-of-fit on $F^2$             | 1.013                              |
| Final R indices [ $I > 2\sigma(I)$ ] | R1 = 0.0419, wR2 = 0.0983          |
| R indices (all data)                 | R1 = 0.0530, wR2 = 0.1065          |
| Extinction coefficient               | 0.032(9)                           |
| Largest diff. peak and hole          | 0.243 and -0.300 e.Å <sup>-3</sup> |

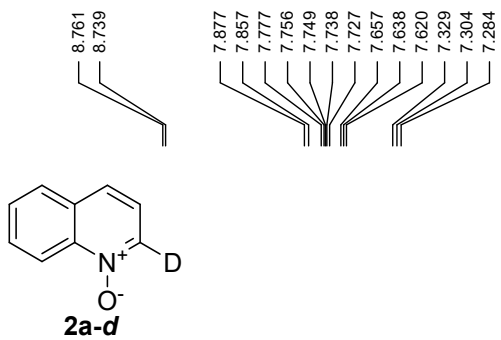

0.000

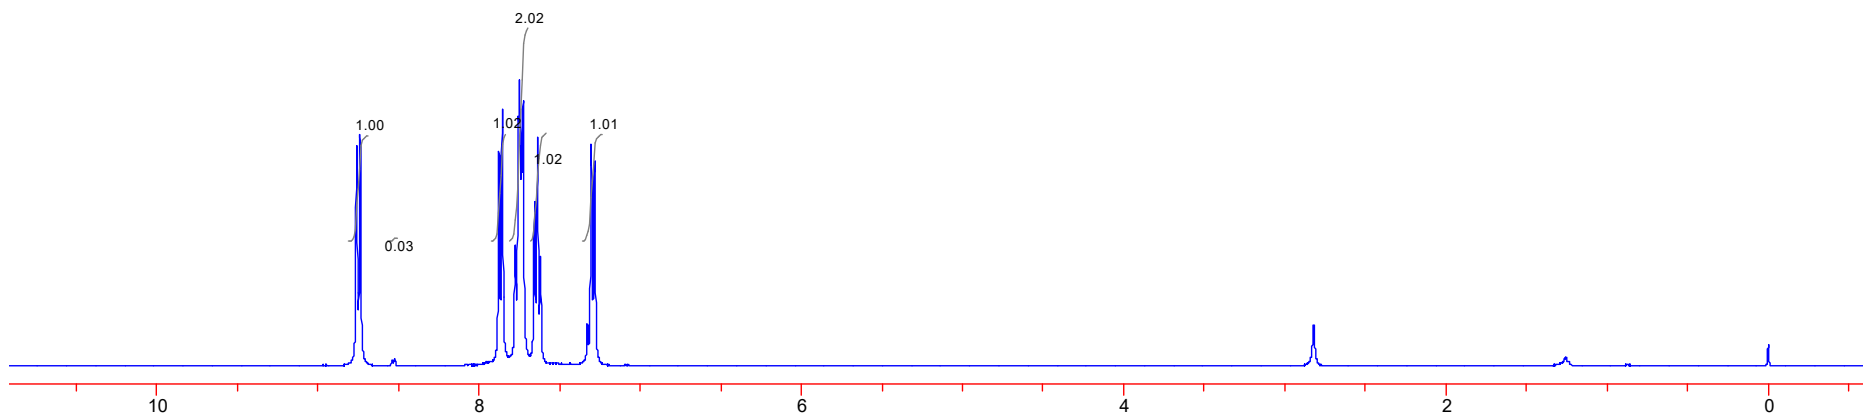

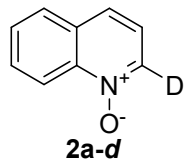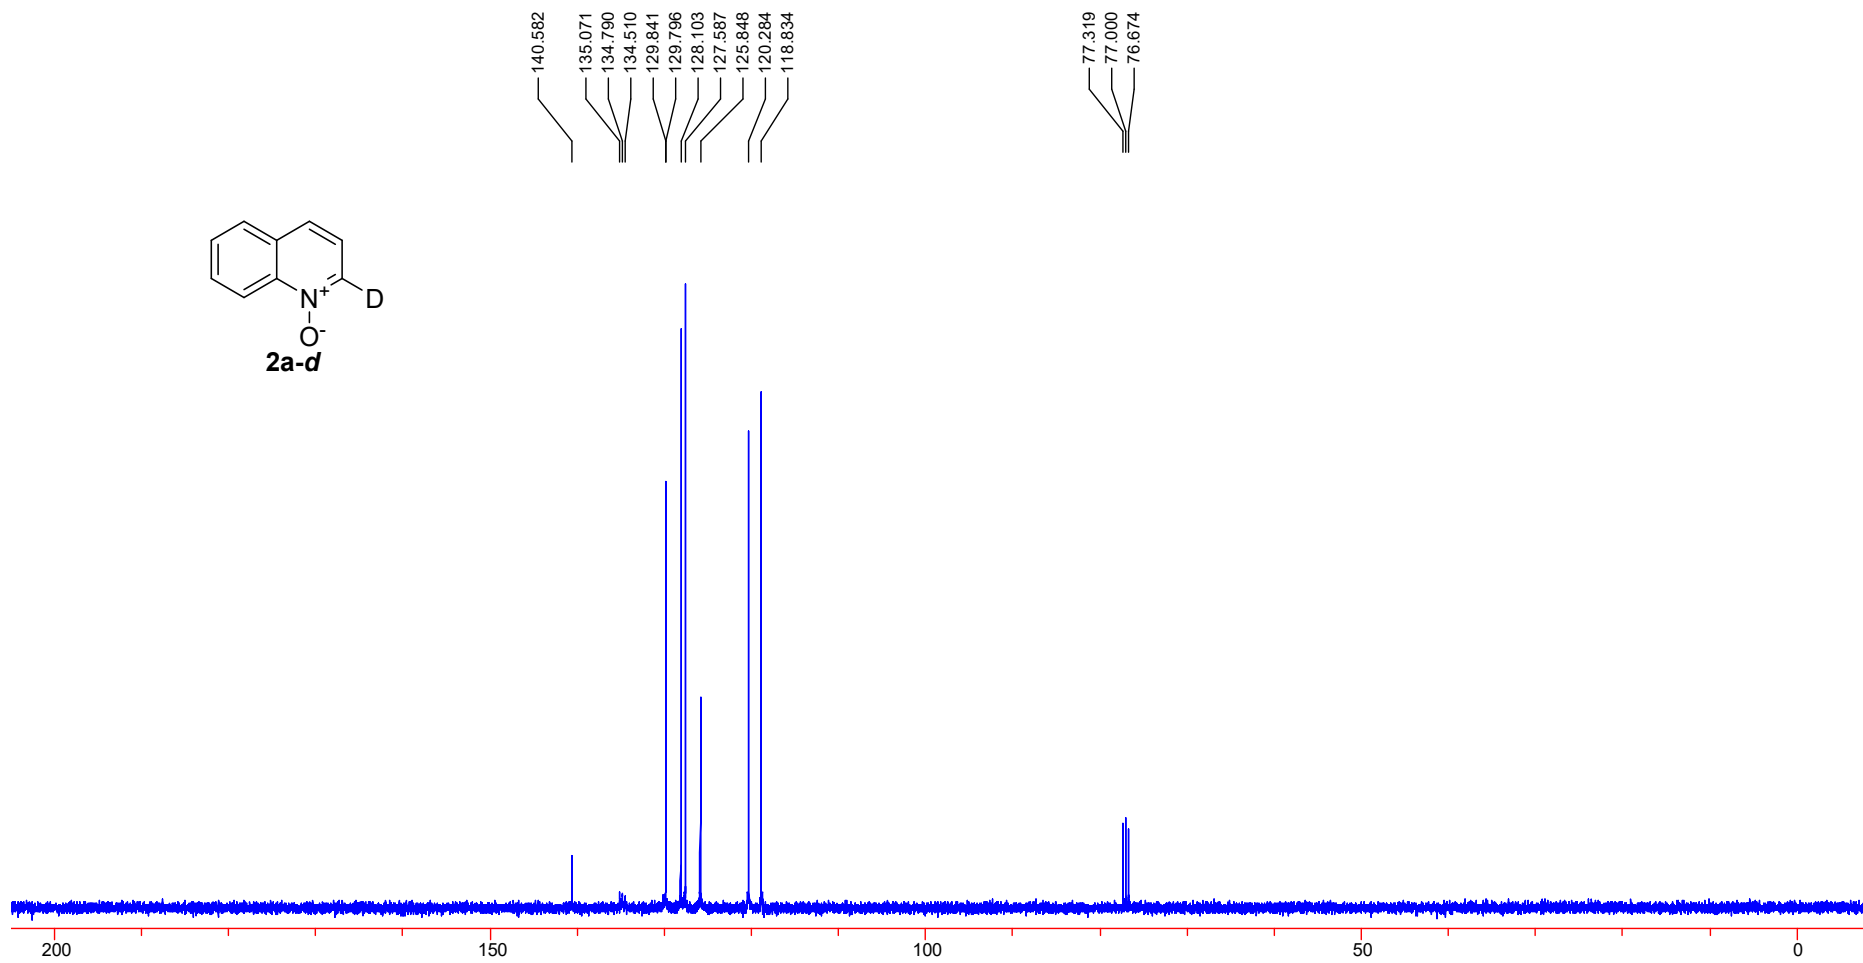



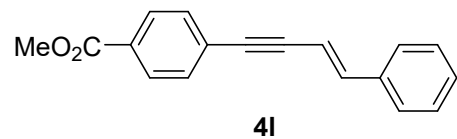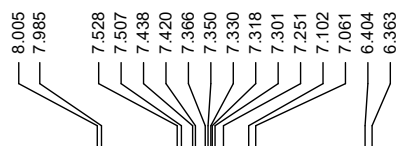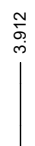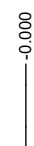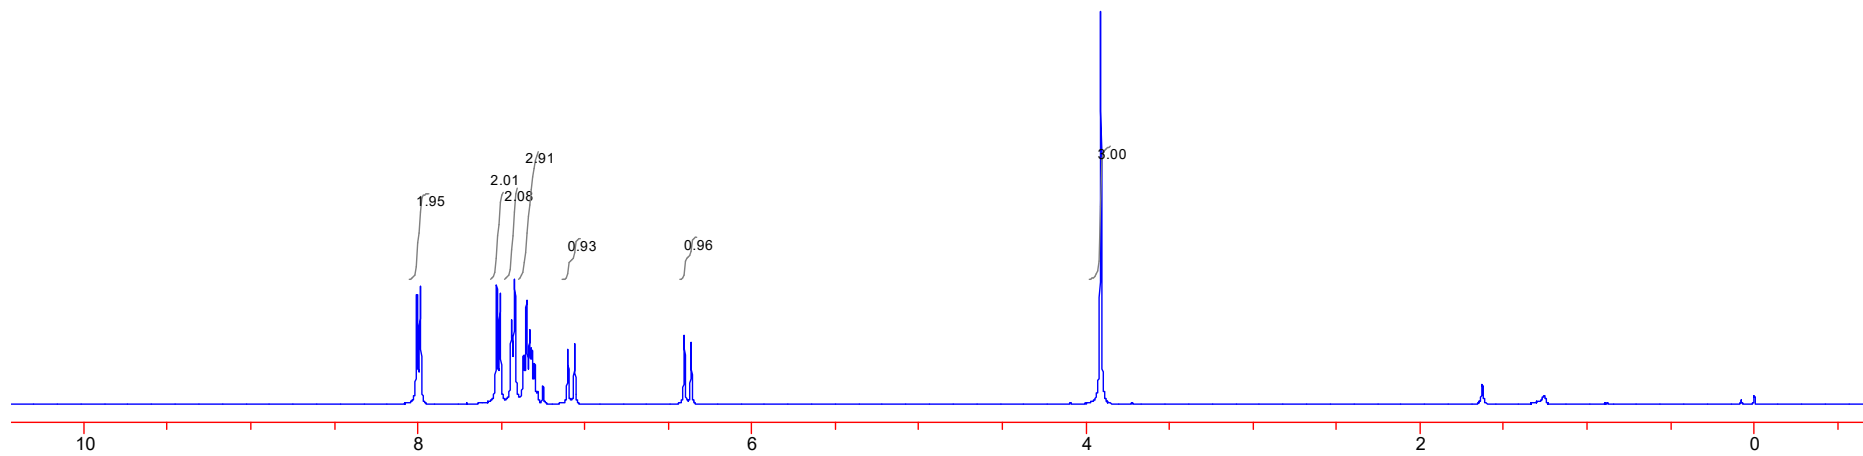

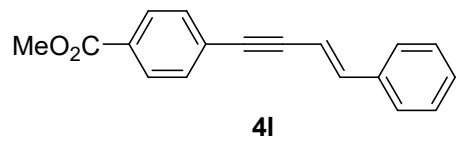

166.506  
142.335  
136.009  
131.341  
129.477  
129.284  
128.904  
128.755  
128.093  
126.407  
107.566  
91.912  
90.891  
77.315  
77.000  
76.681  
52.183

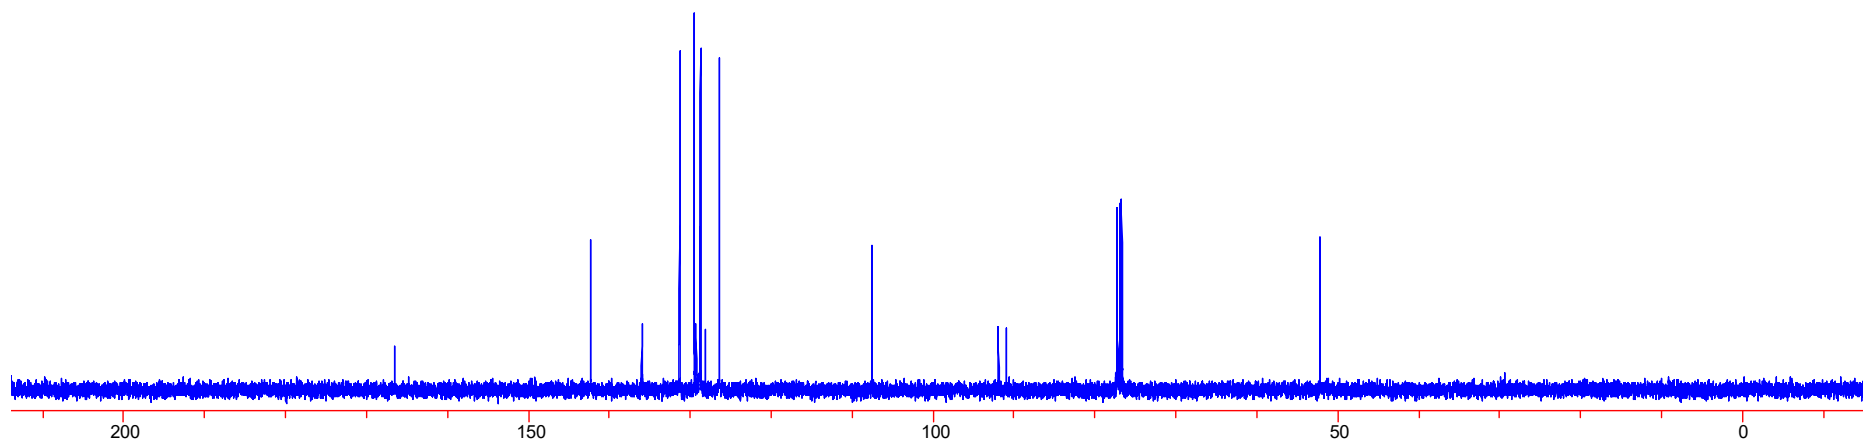

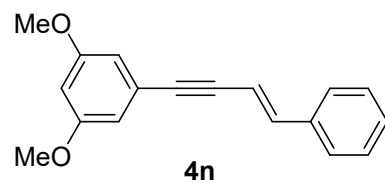

7.427  
7.408  
7.359  
7.341  
7.322  
7.304  
7.286  
7.247  
7.067  
7.027  
6.640  
6.635  
6.451  
6.446  
6.388  
6.347

3.787

-0.000

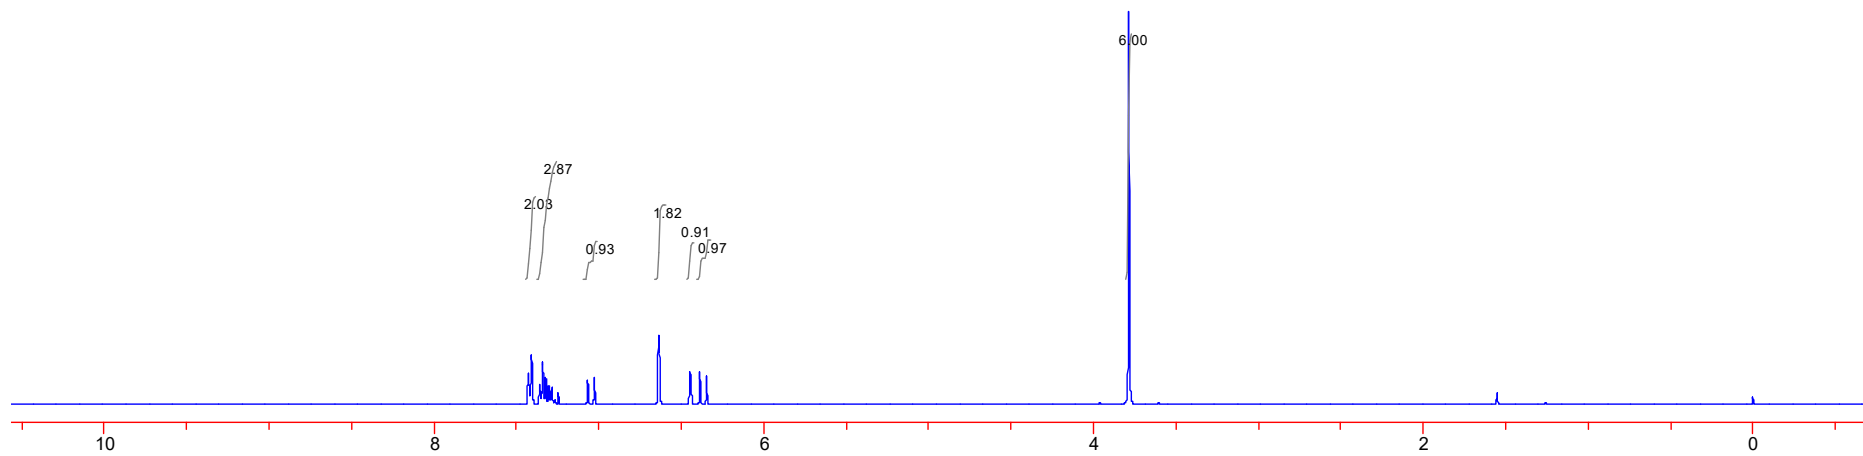

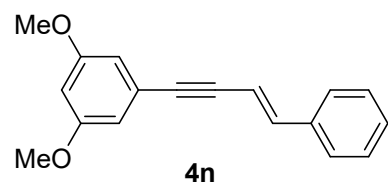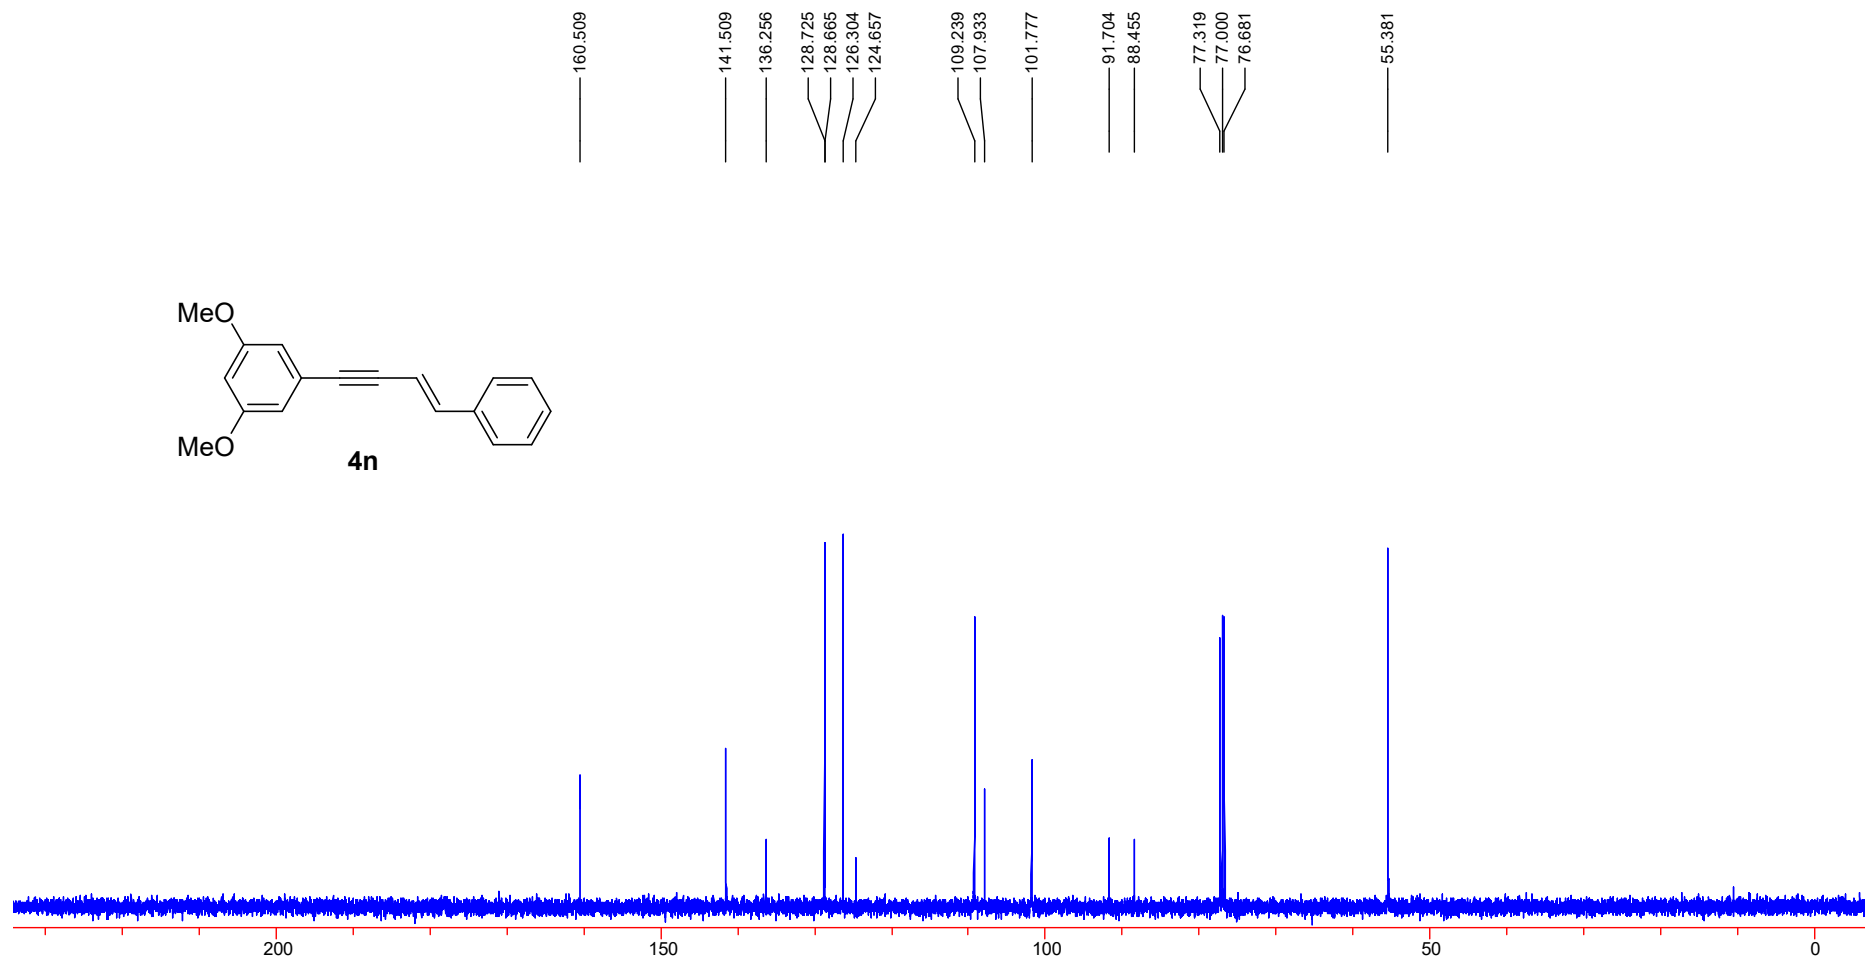

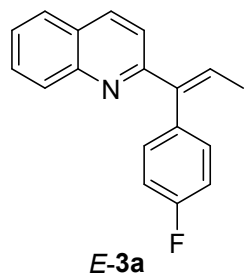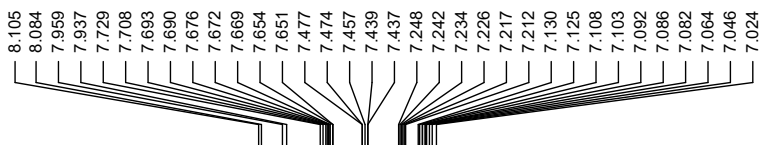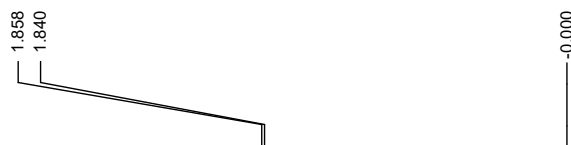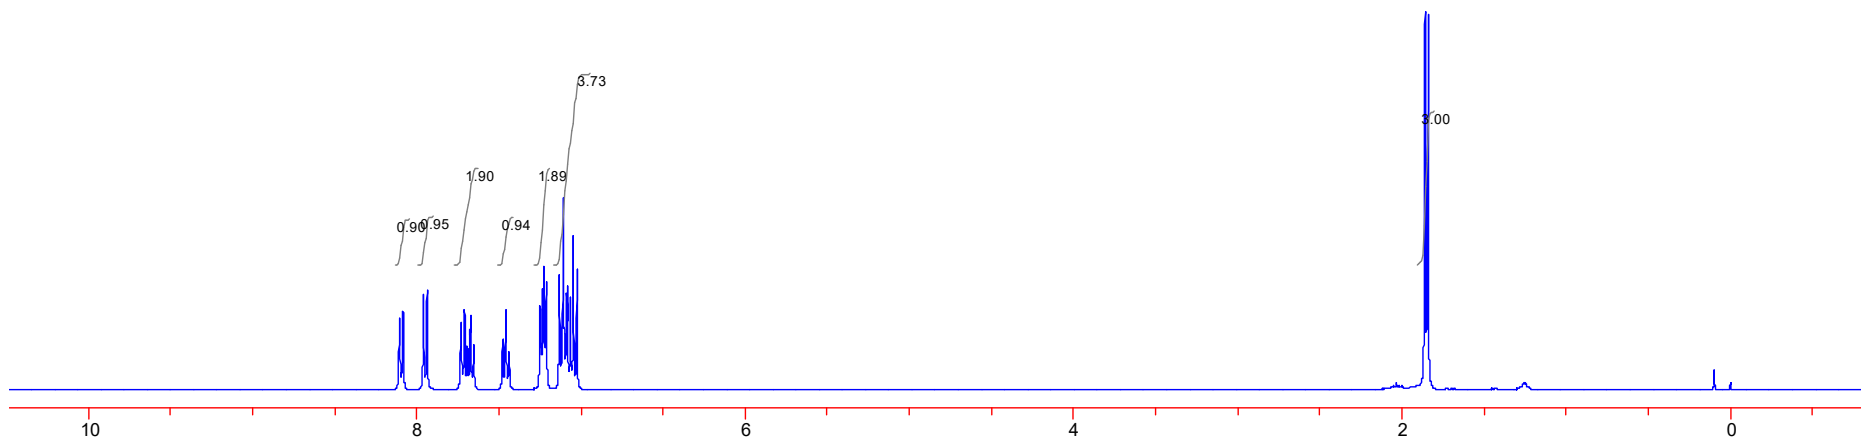

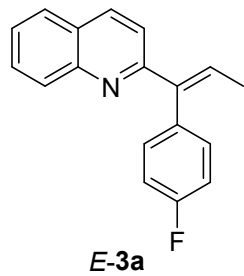

163.178  
160.733  
158.784

147.802  
135.925  
141.121  
134.436  
134.399  
131.769  
131.692  
130.321  
129.473  
129.433  
127.291  
126.992  
125.939  
120.464  
115.433  
115.223

77.319  
77.000  
76.681

15.663

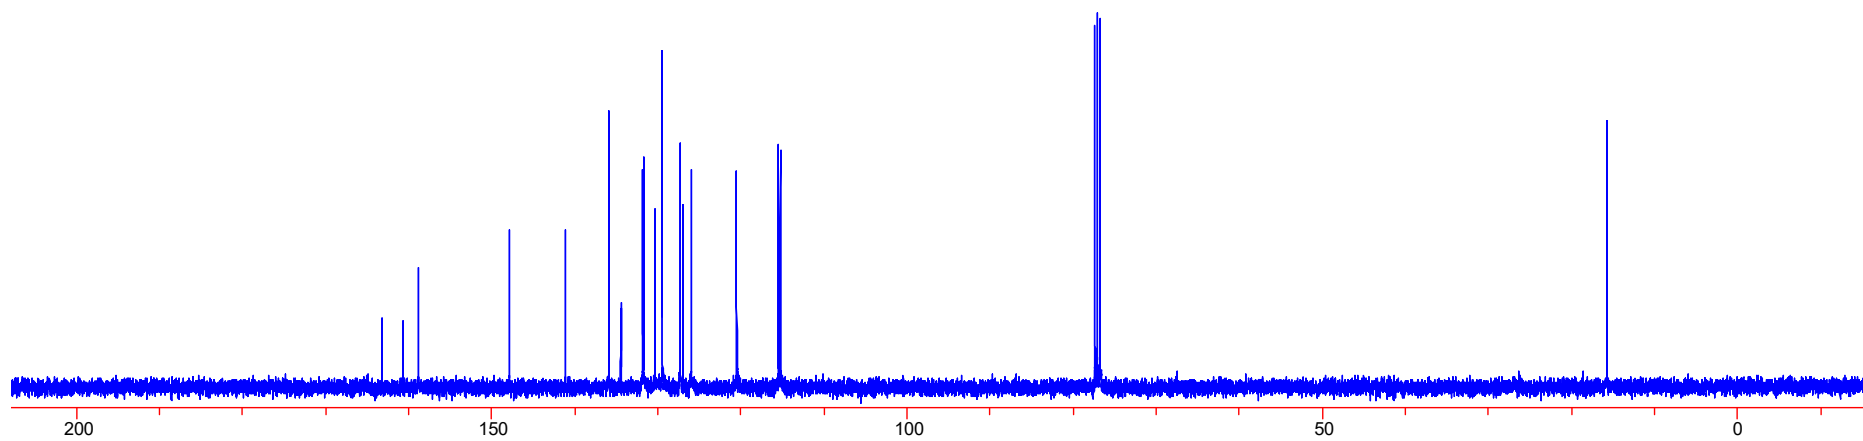

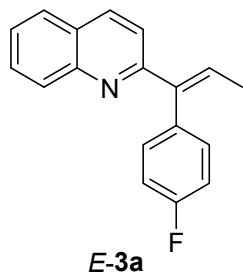

115.042  
115.057  
115.063  
115.078

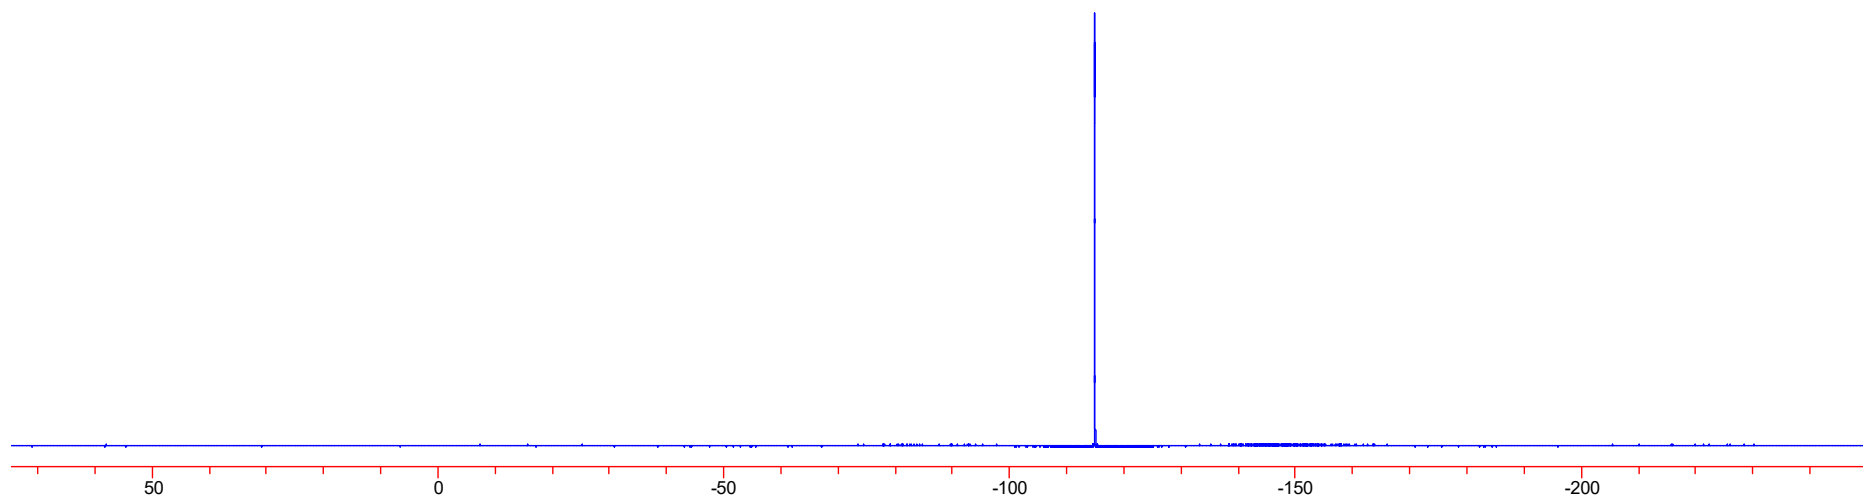

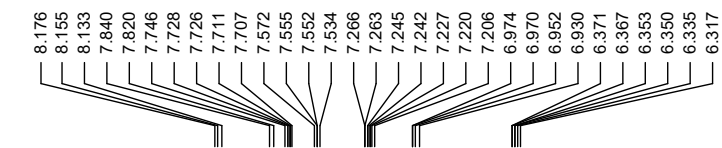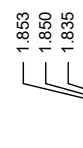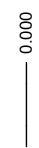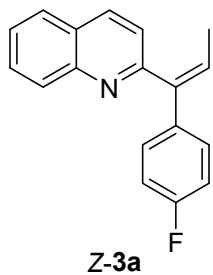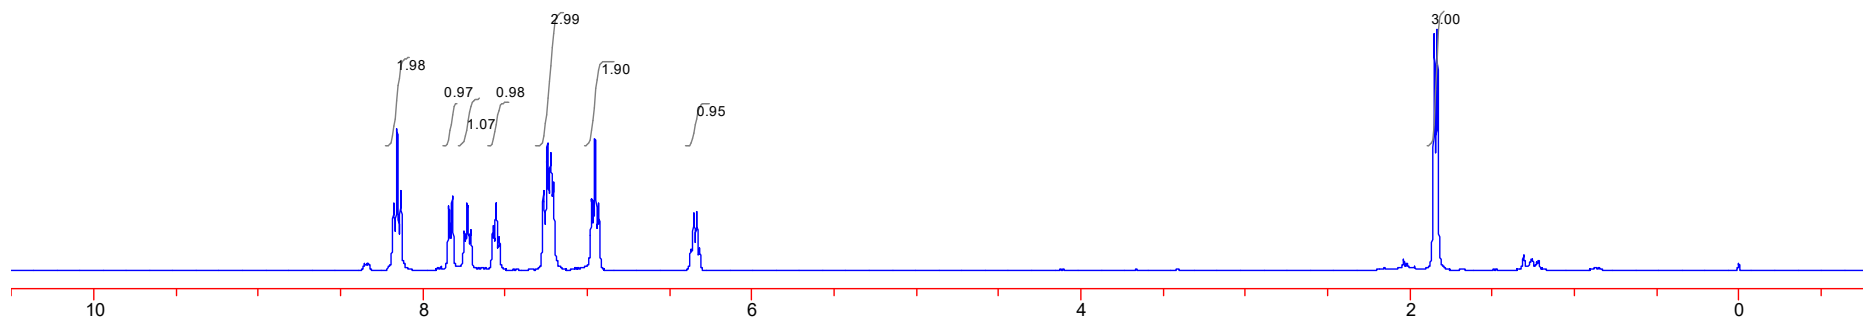



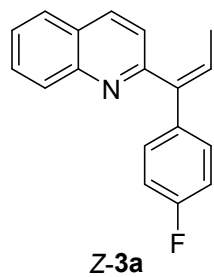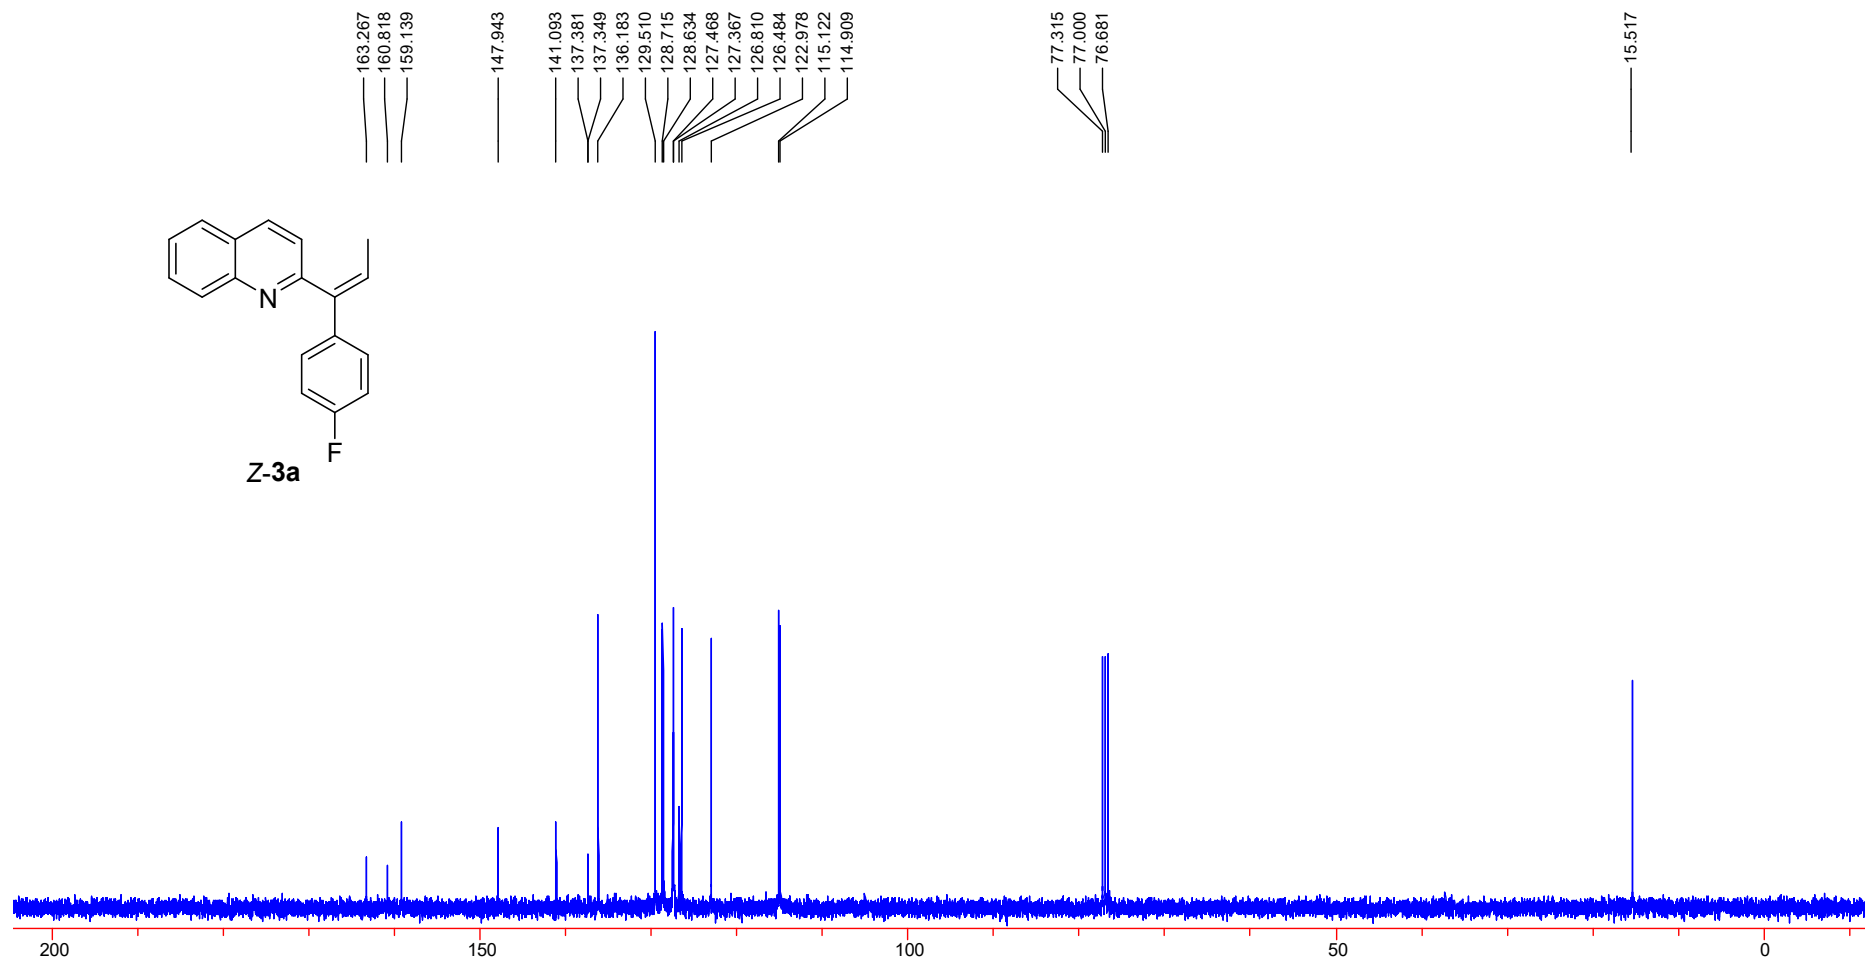

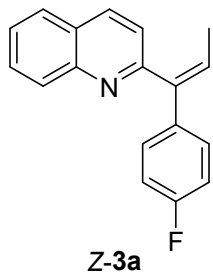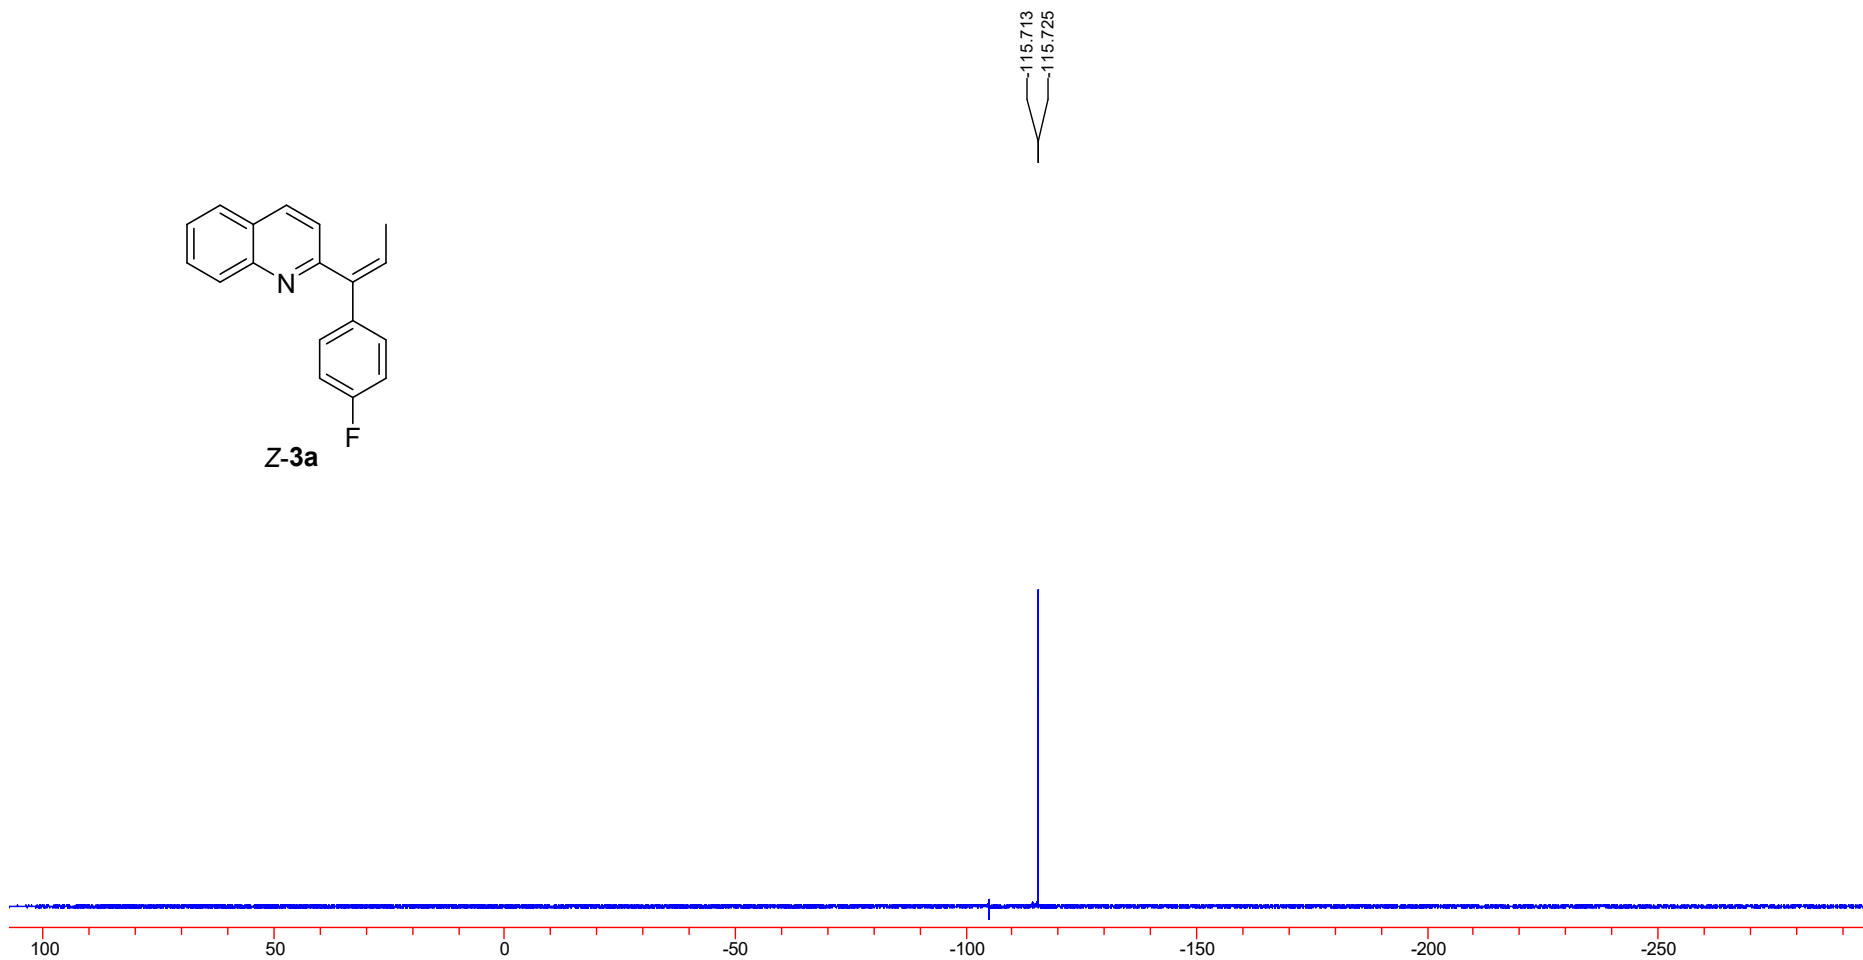

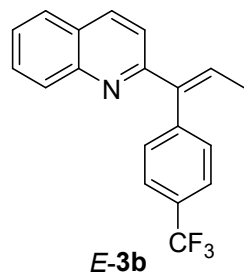

8.099  
8.077  
7.954  
7.932  
7.718  
7.697  
7.685  
7.665  
7.643  
7.466  
7.447  
7.429  
7.388  
7.369  
7.240  
7.148  
7.130  
7.112  
7.094  
7.026  
7.005

1.849  
1.831

0.000

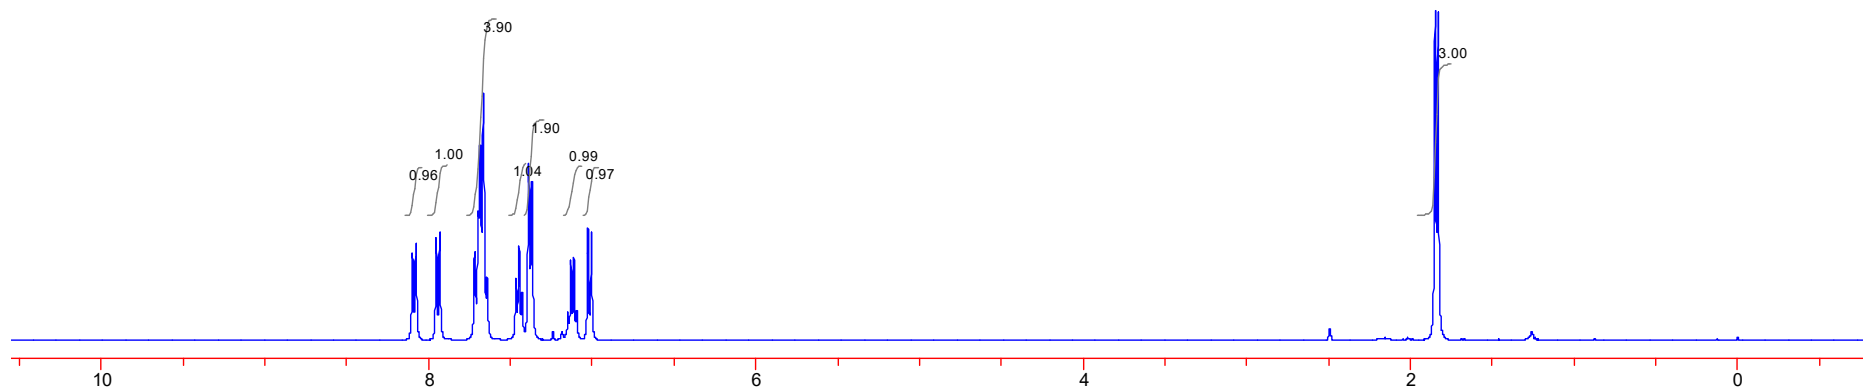

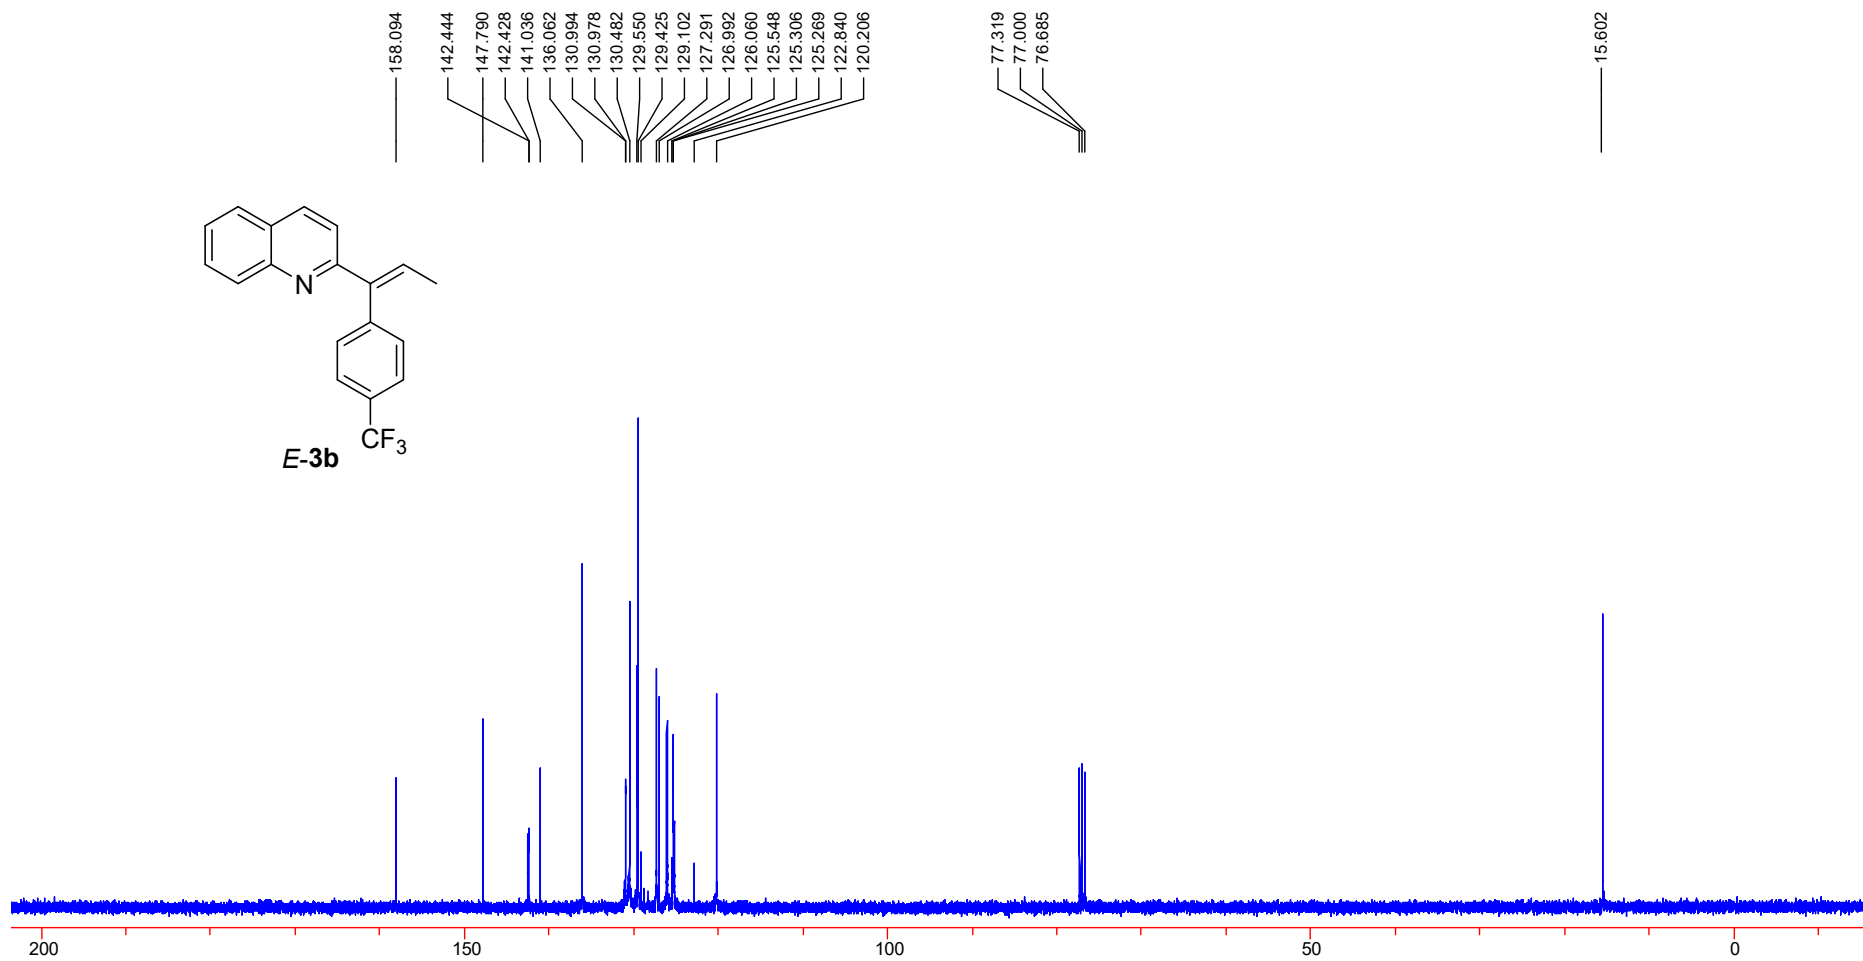

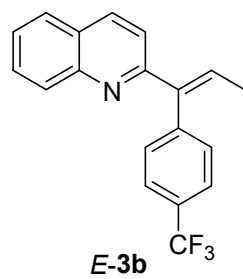

62.387

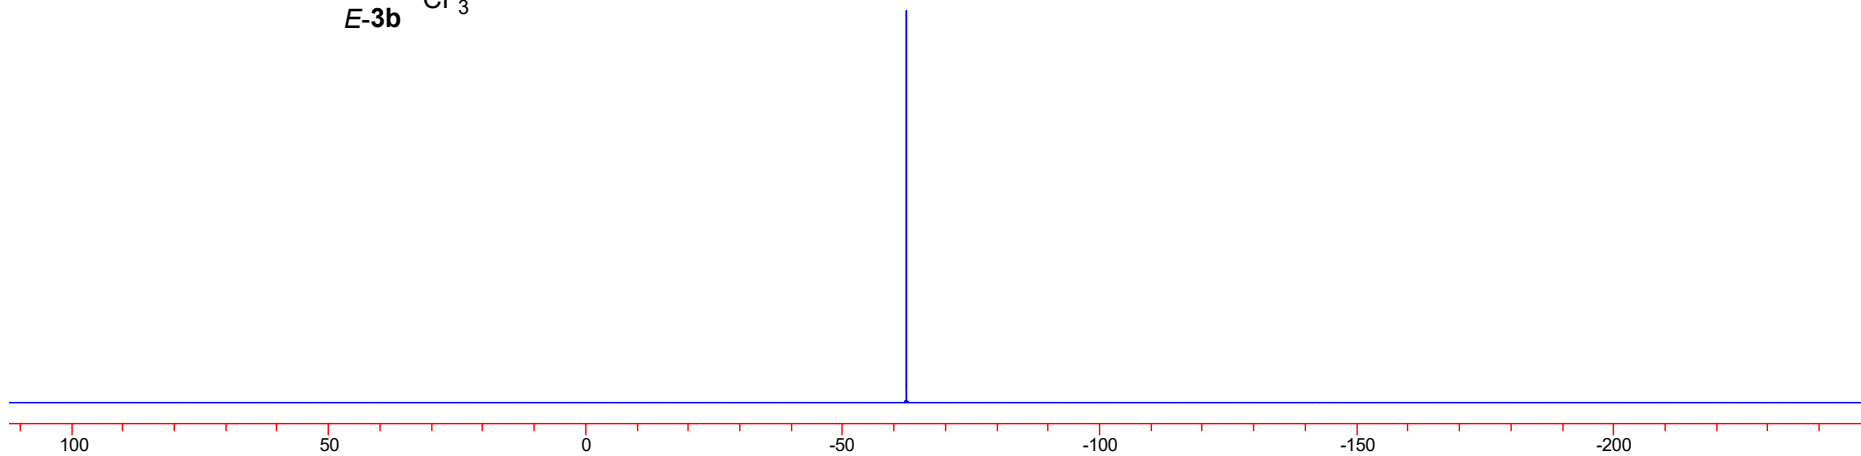

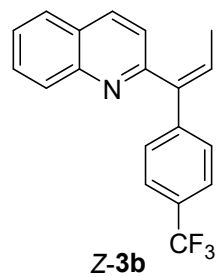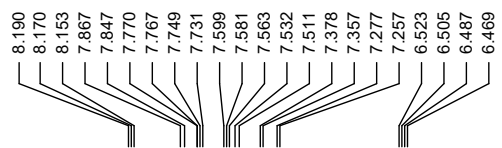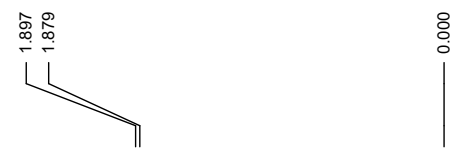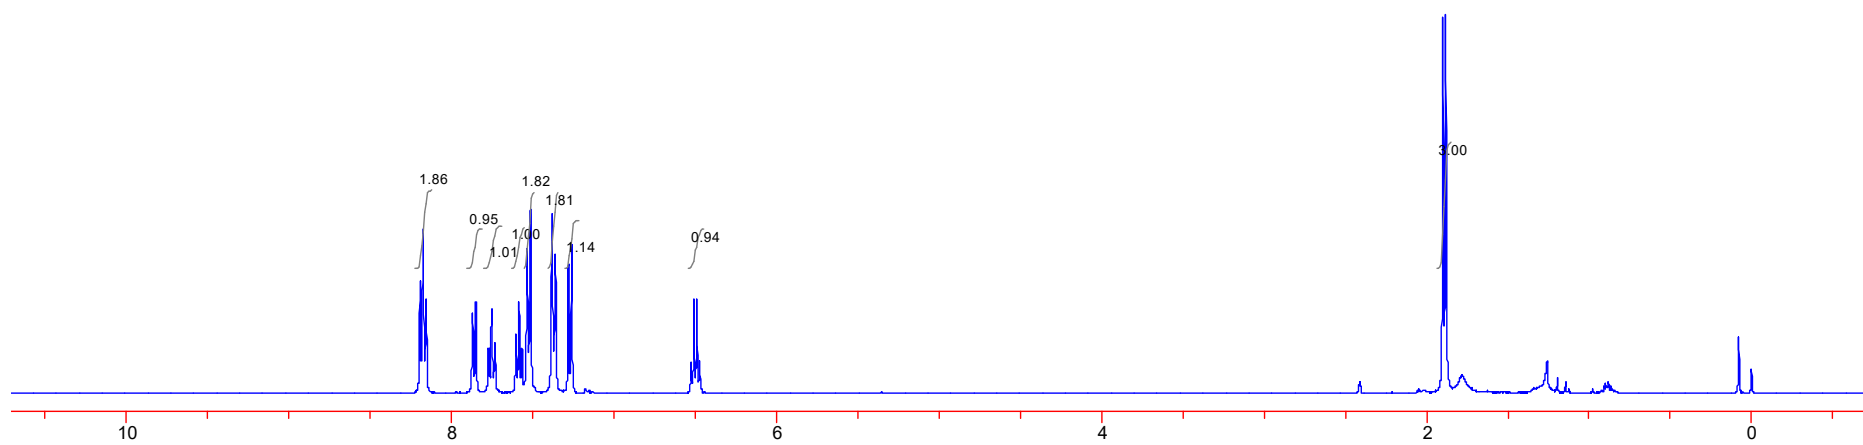

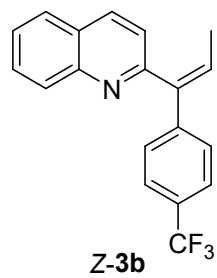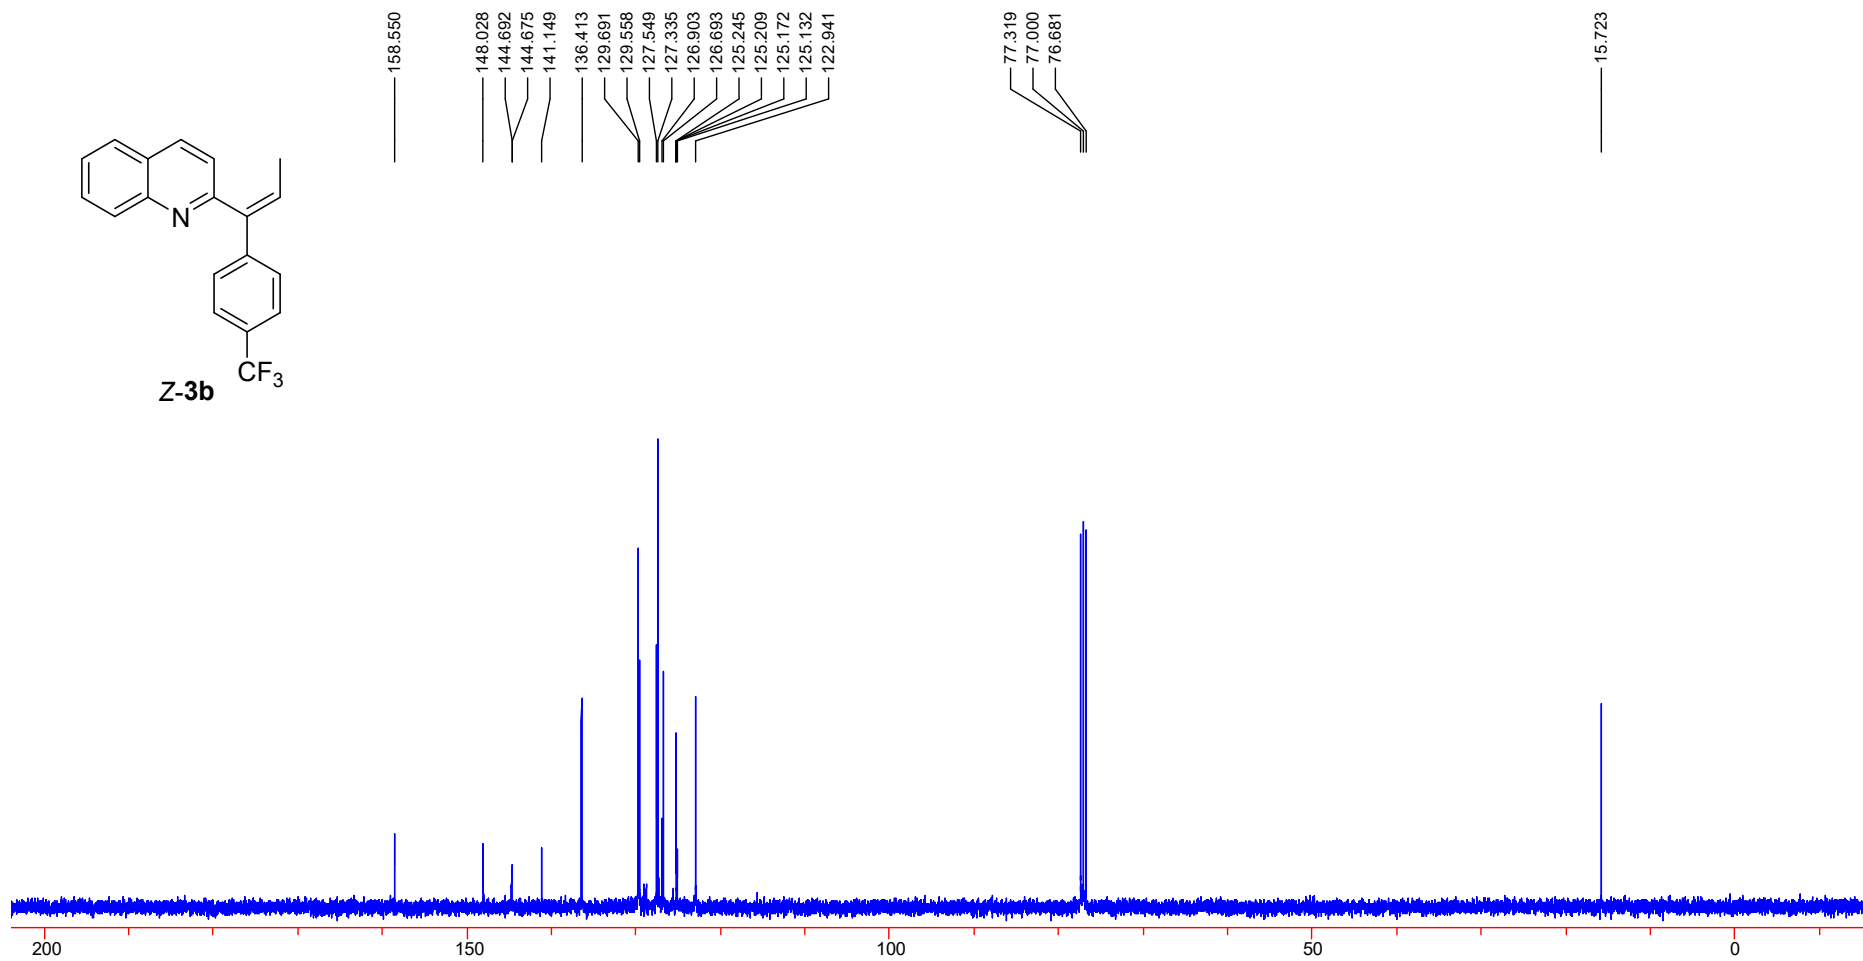

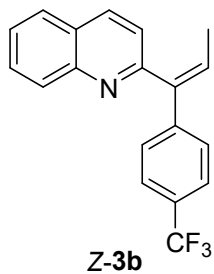

62.451

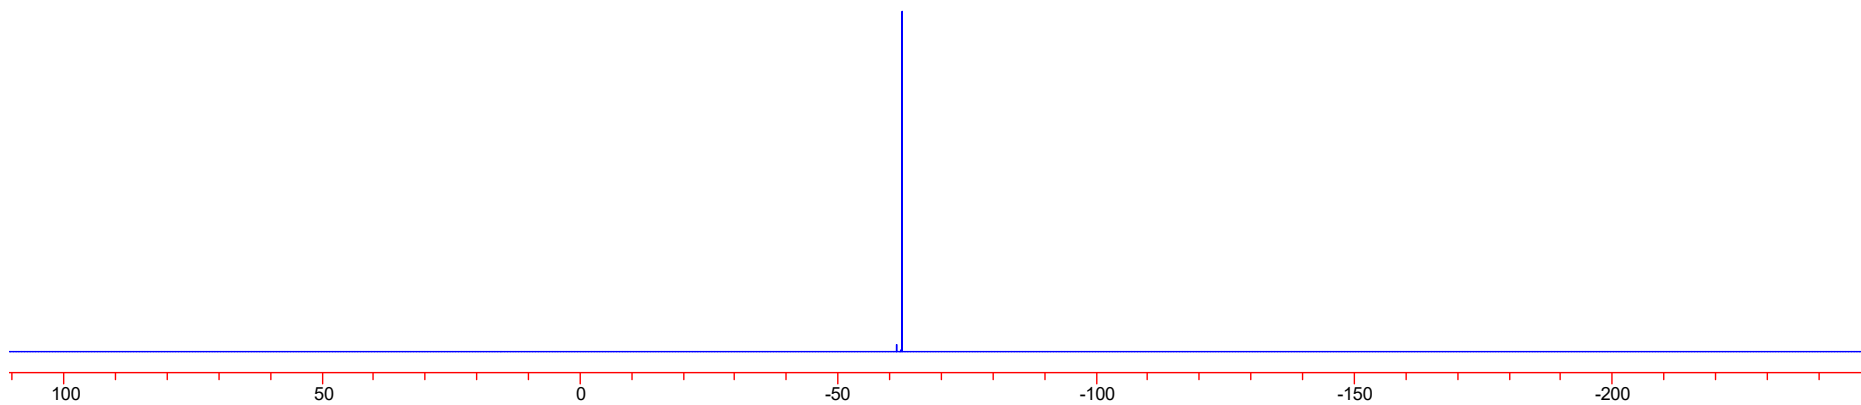



8.095  
8.078  
7.972  
7.954  
7.741  
7.724  
7.698  
7.695  
7.684  
7.681  
7.678  
7.667  
7.665  
7.486  
7.485  
7.471  
7.456  
7.454  
7.406  
7.403  
7.394  
7.390  
7.385  
7.253  
7.219  
7.214  
7.202  
7.198  
7.193  
7.099  
7.084  
7.070  
7.055  
7.051  
7.033

1.863  
1.848

-0.000

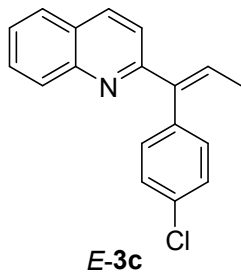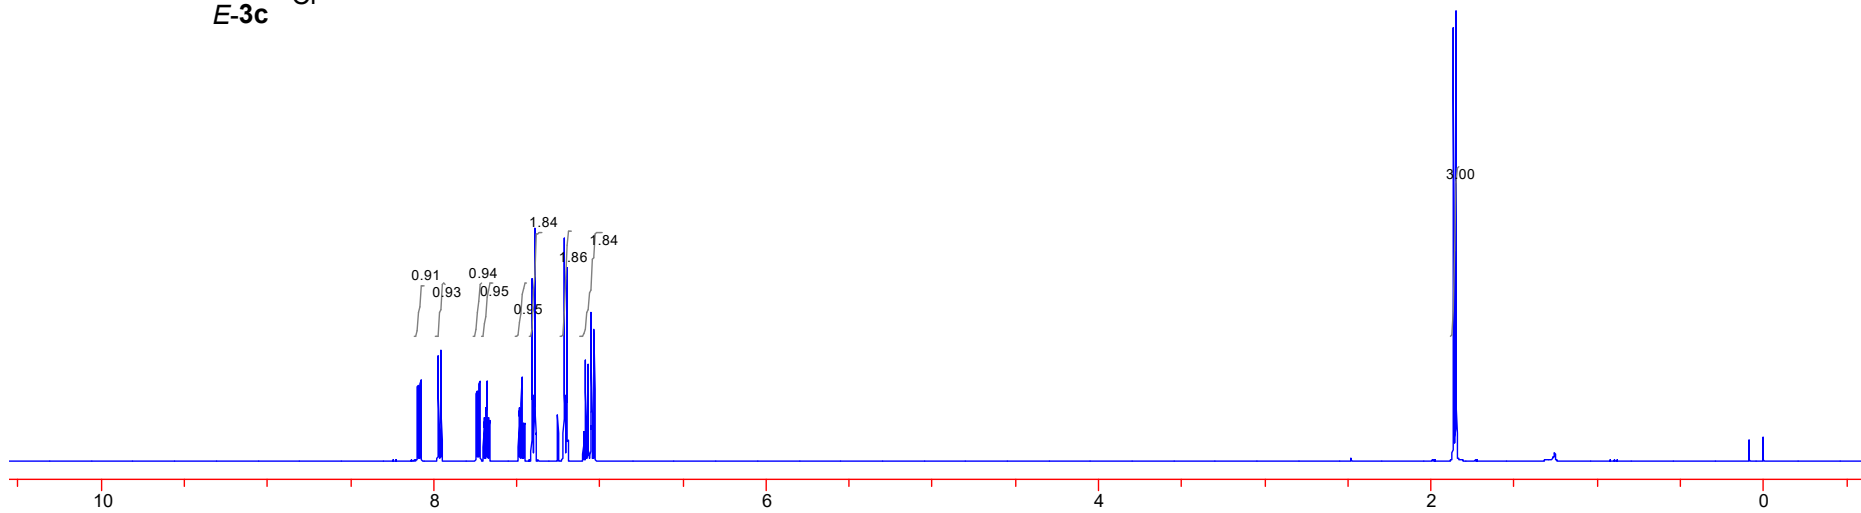

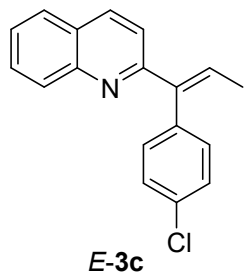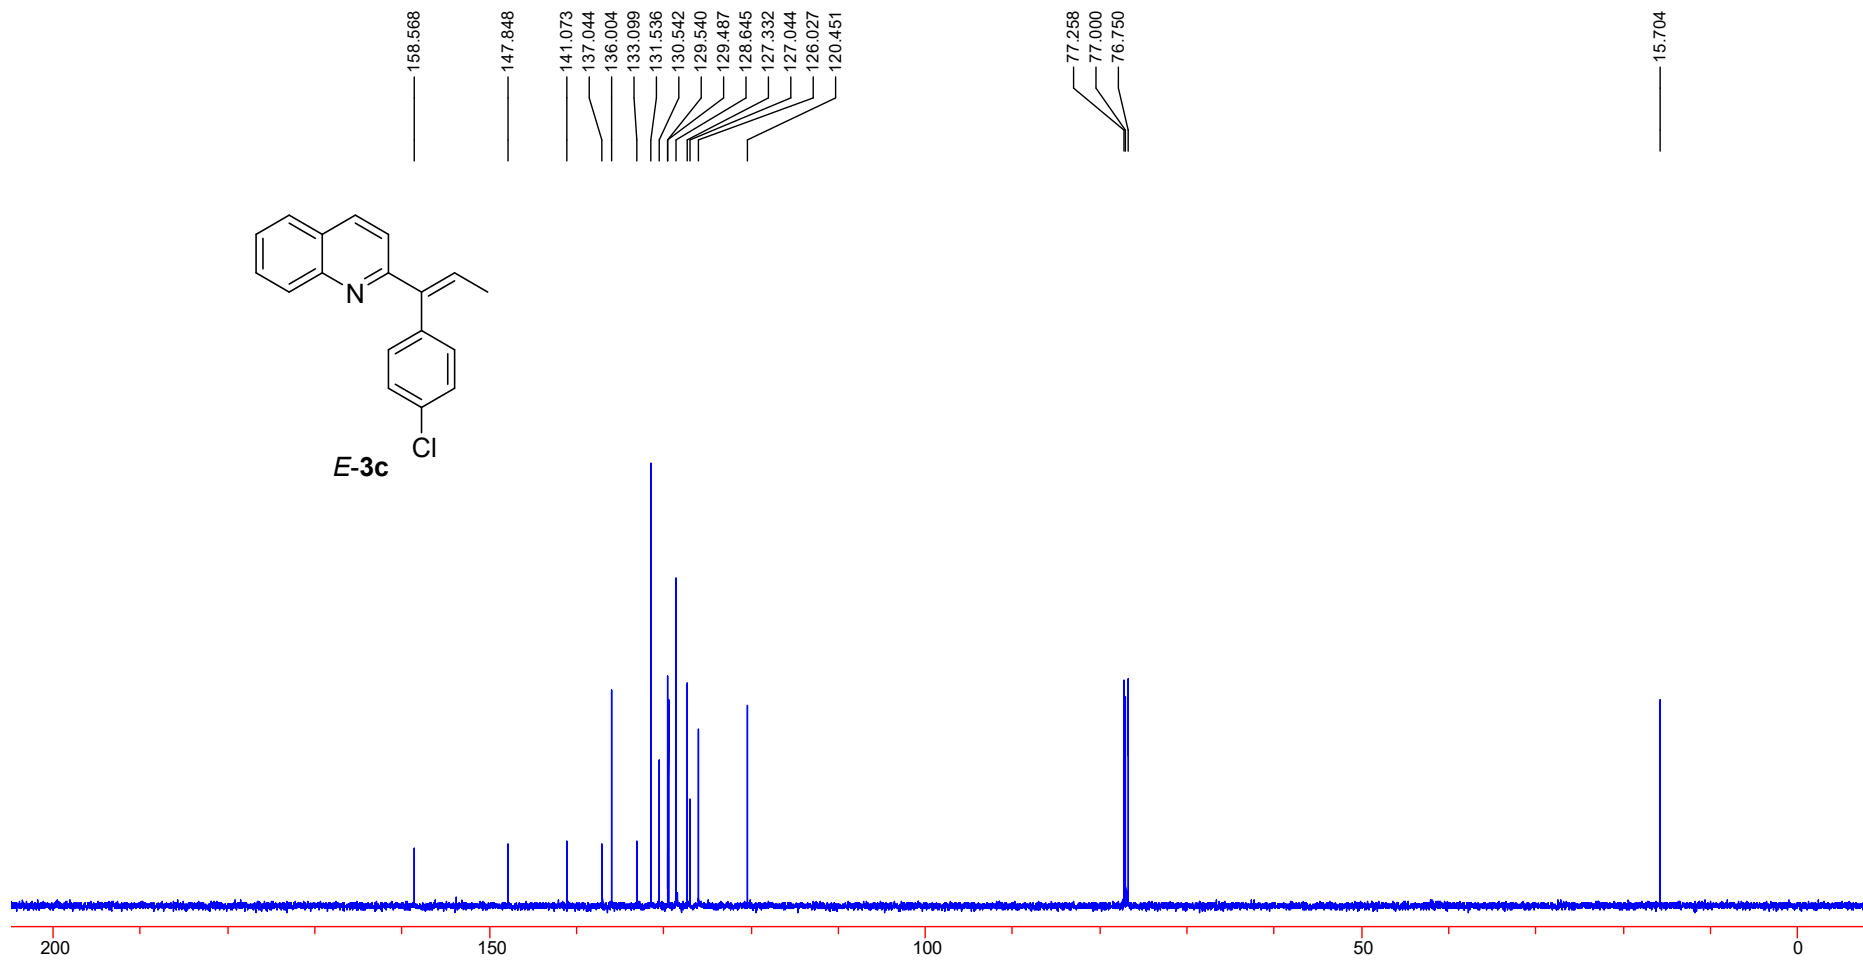

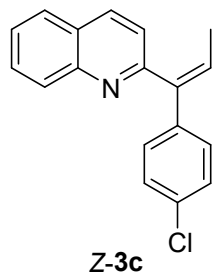

8.198  
8.179  
8.163  
7.856  
7.841  
7.760  
7.746  
7.731  
7.591  
7.576  
7.561  
7.270  
7.260  
7.254  
7.244  
7.227  
7.194  
7.177  
6.425  
6.411  
6.397  
6.383

1.862  
1.847

-0.000

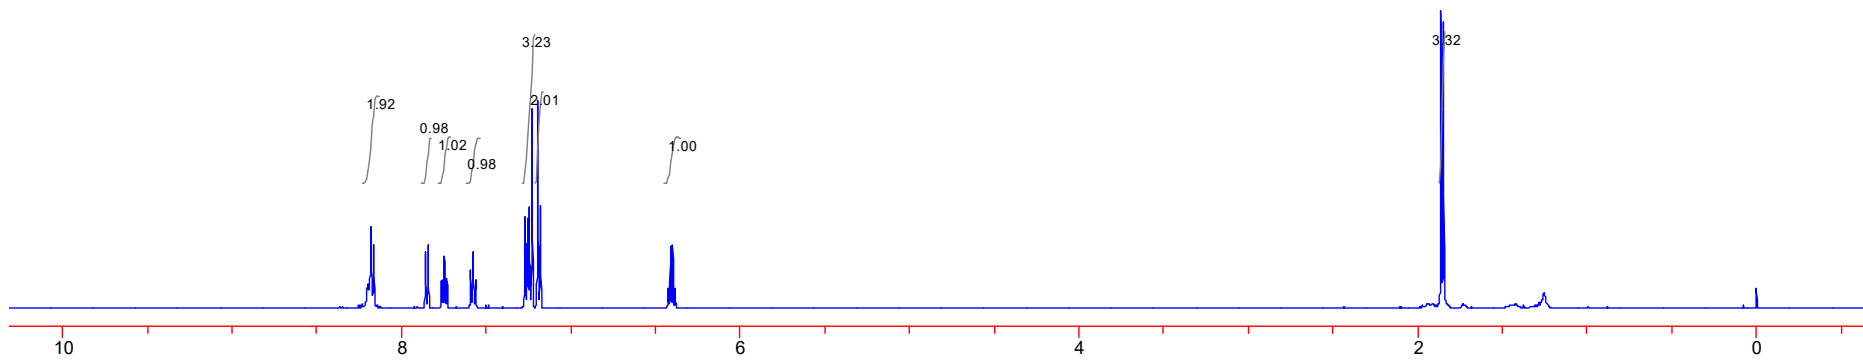

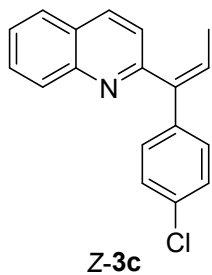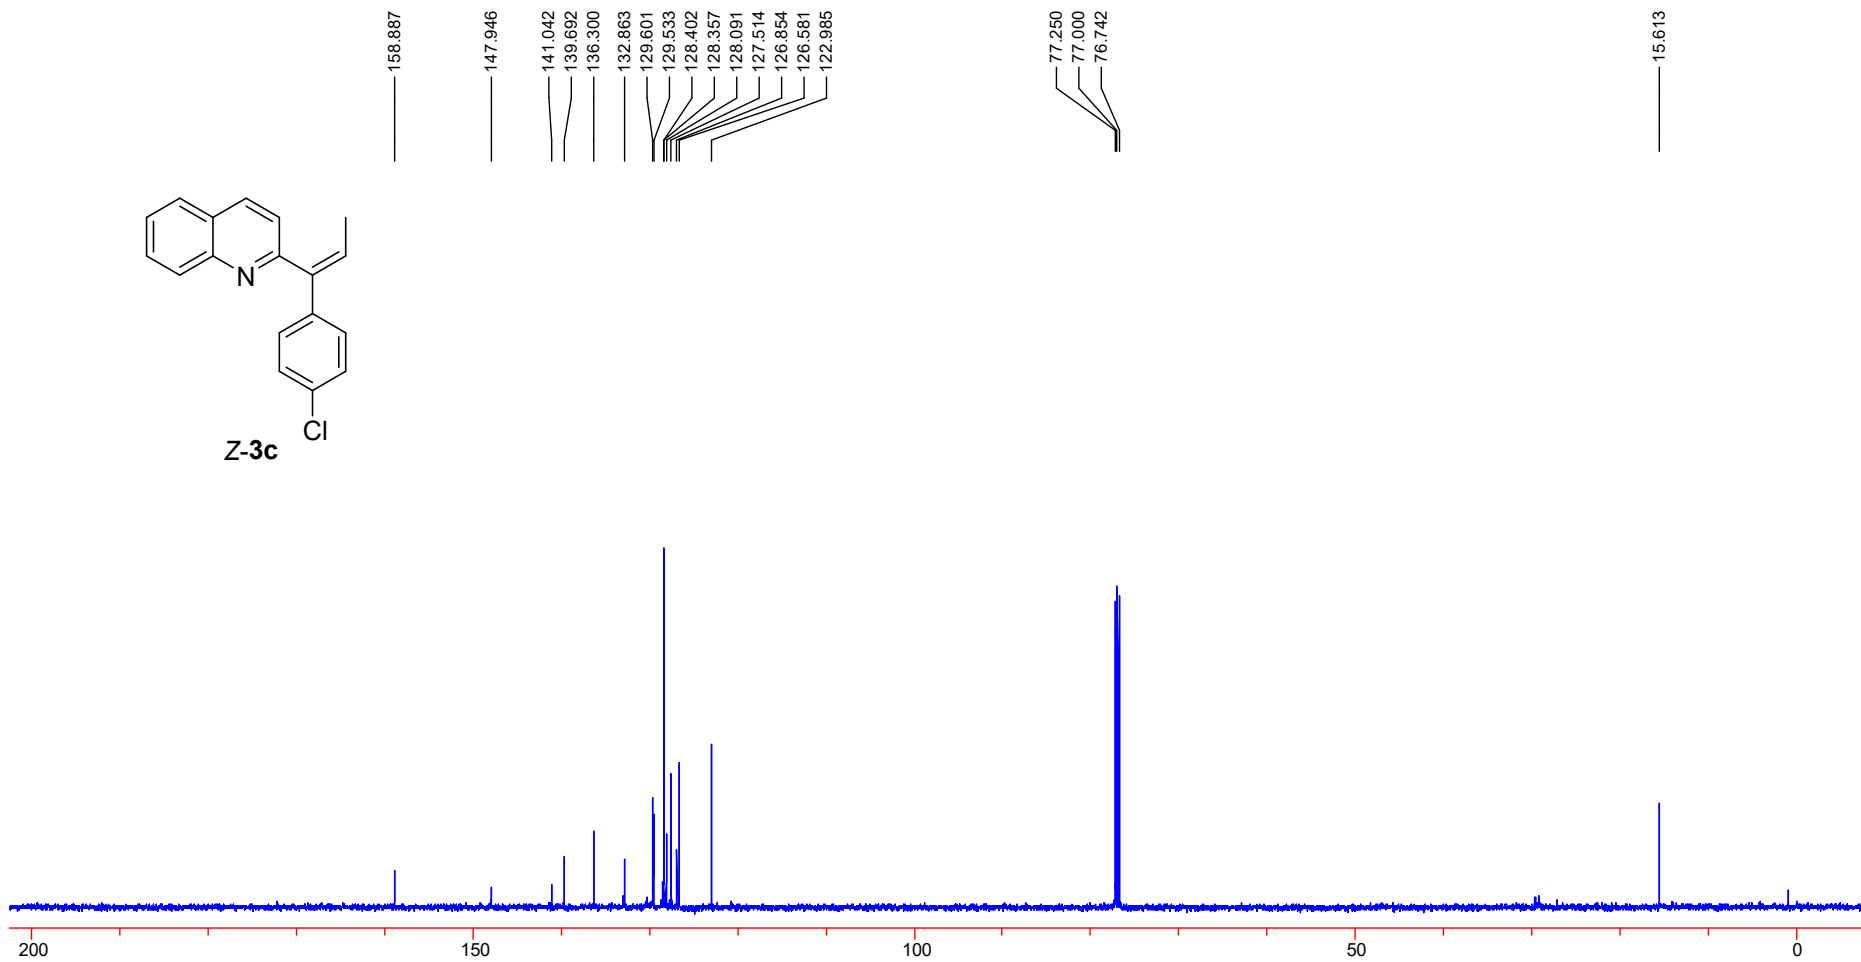

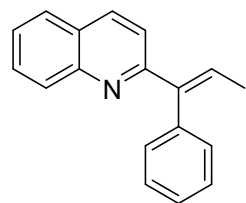

**3d**

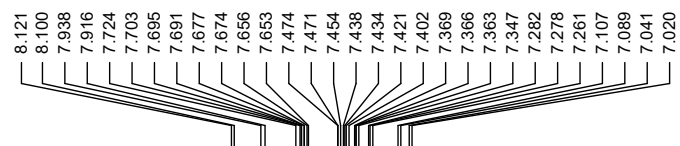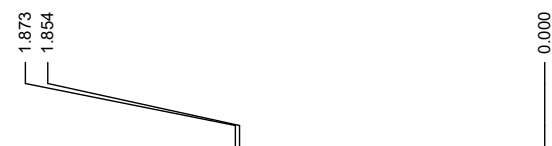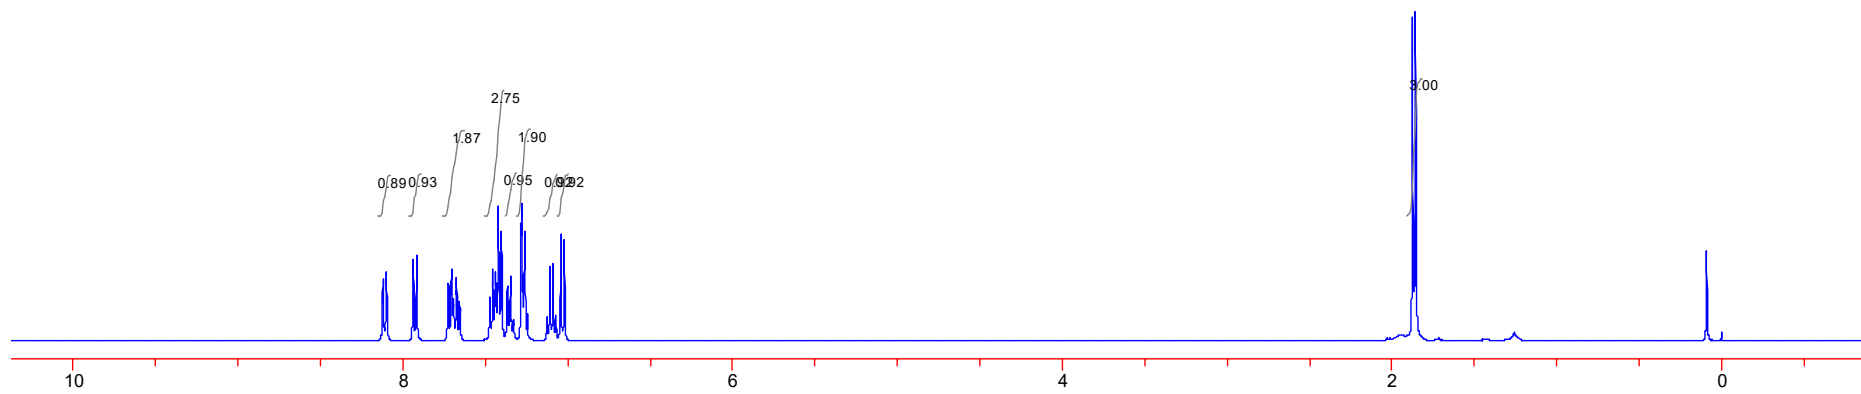

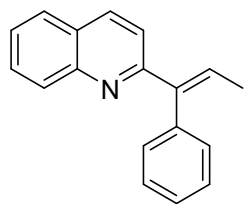

**3d**

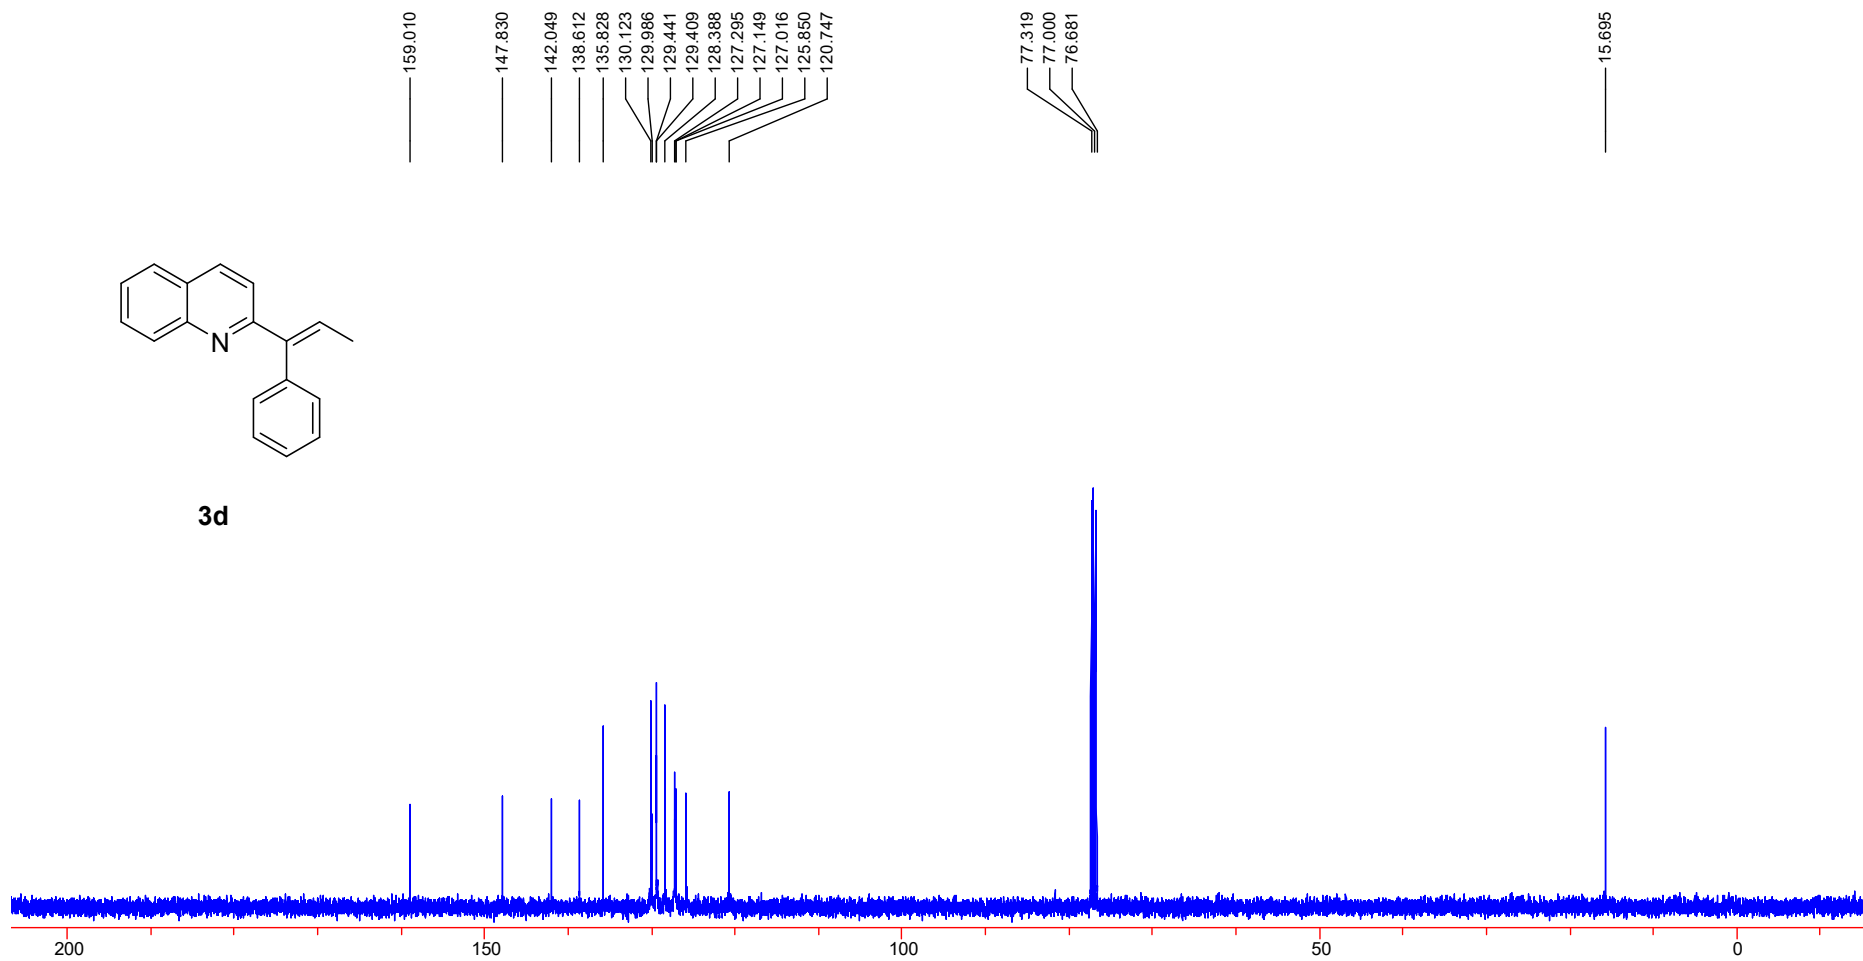

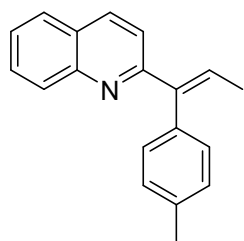

**3e**

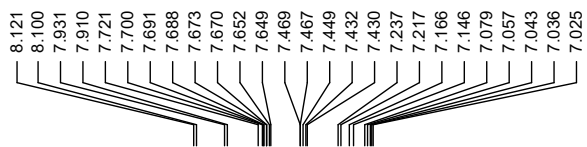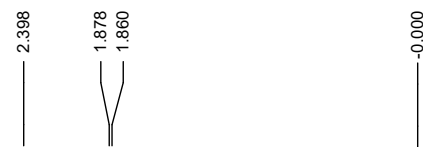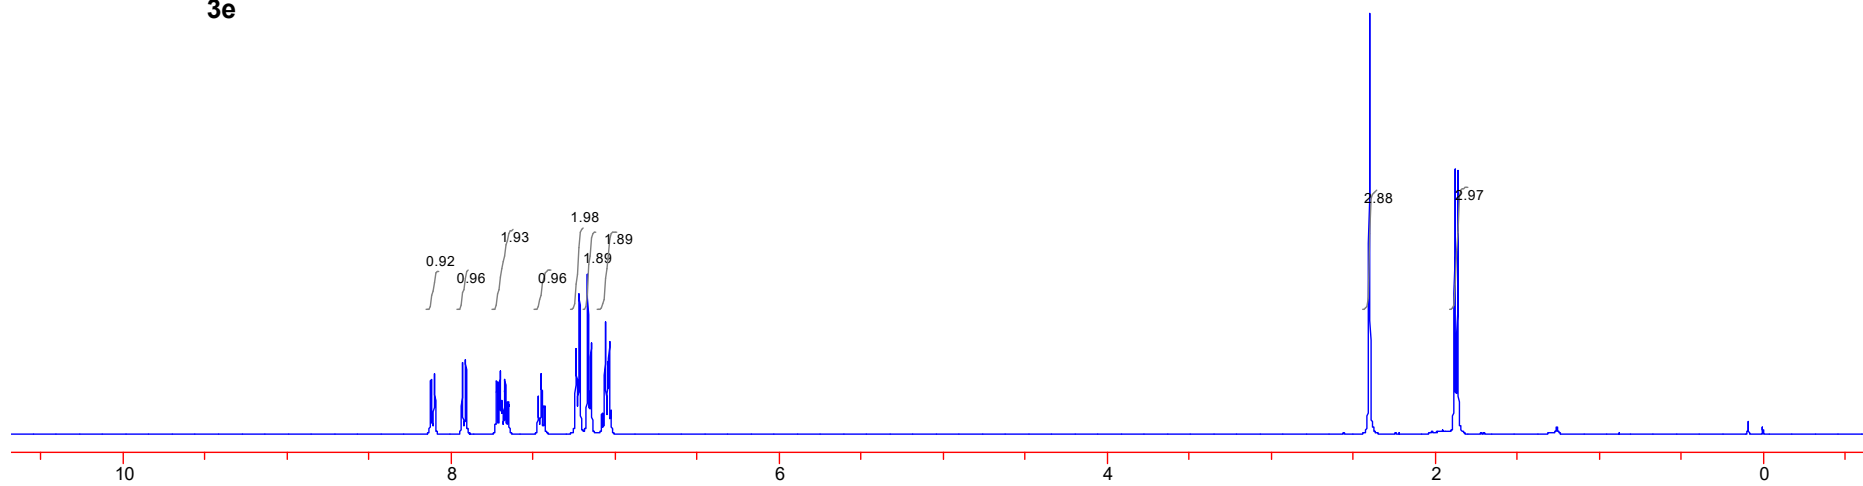

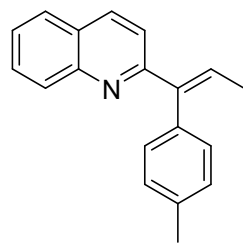

**3e**

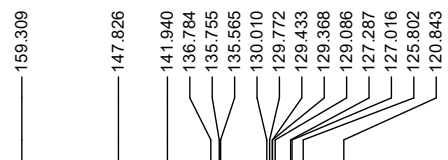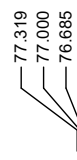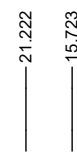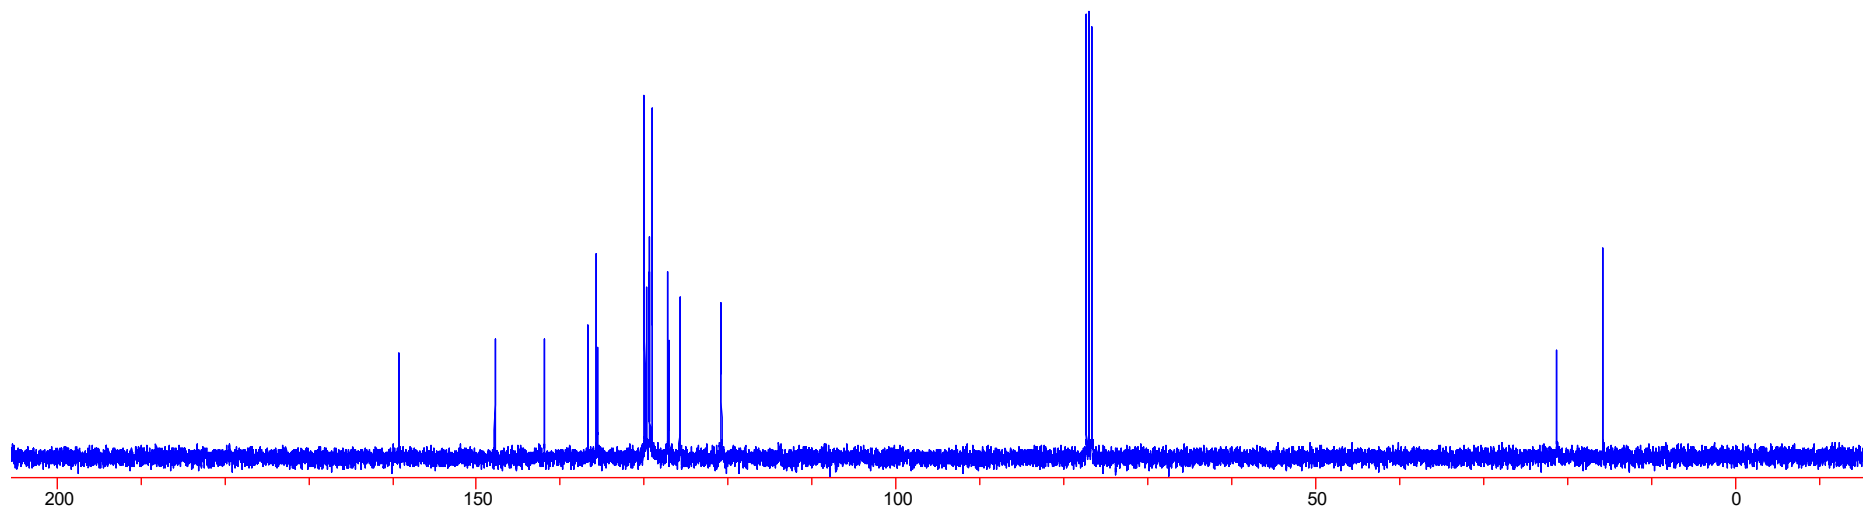



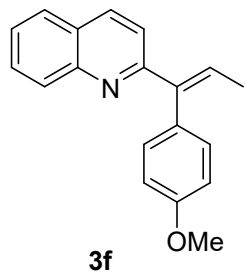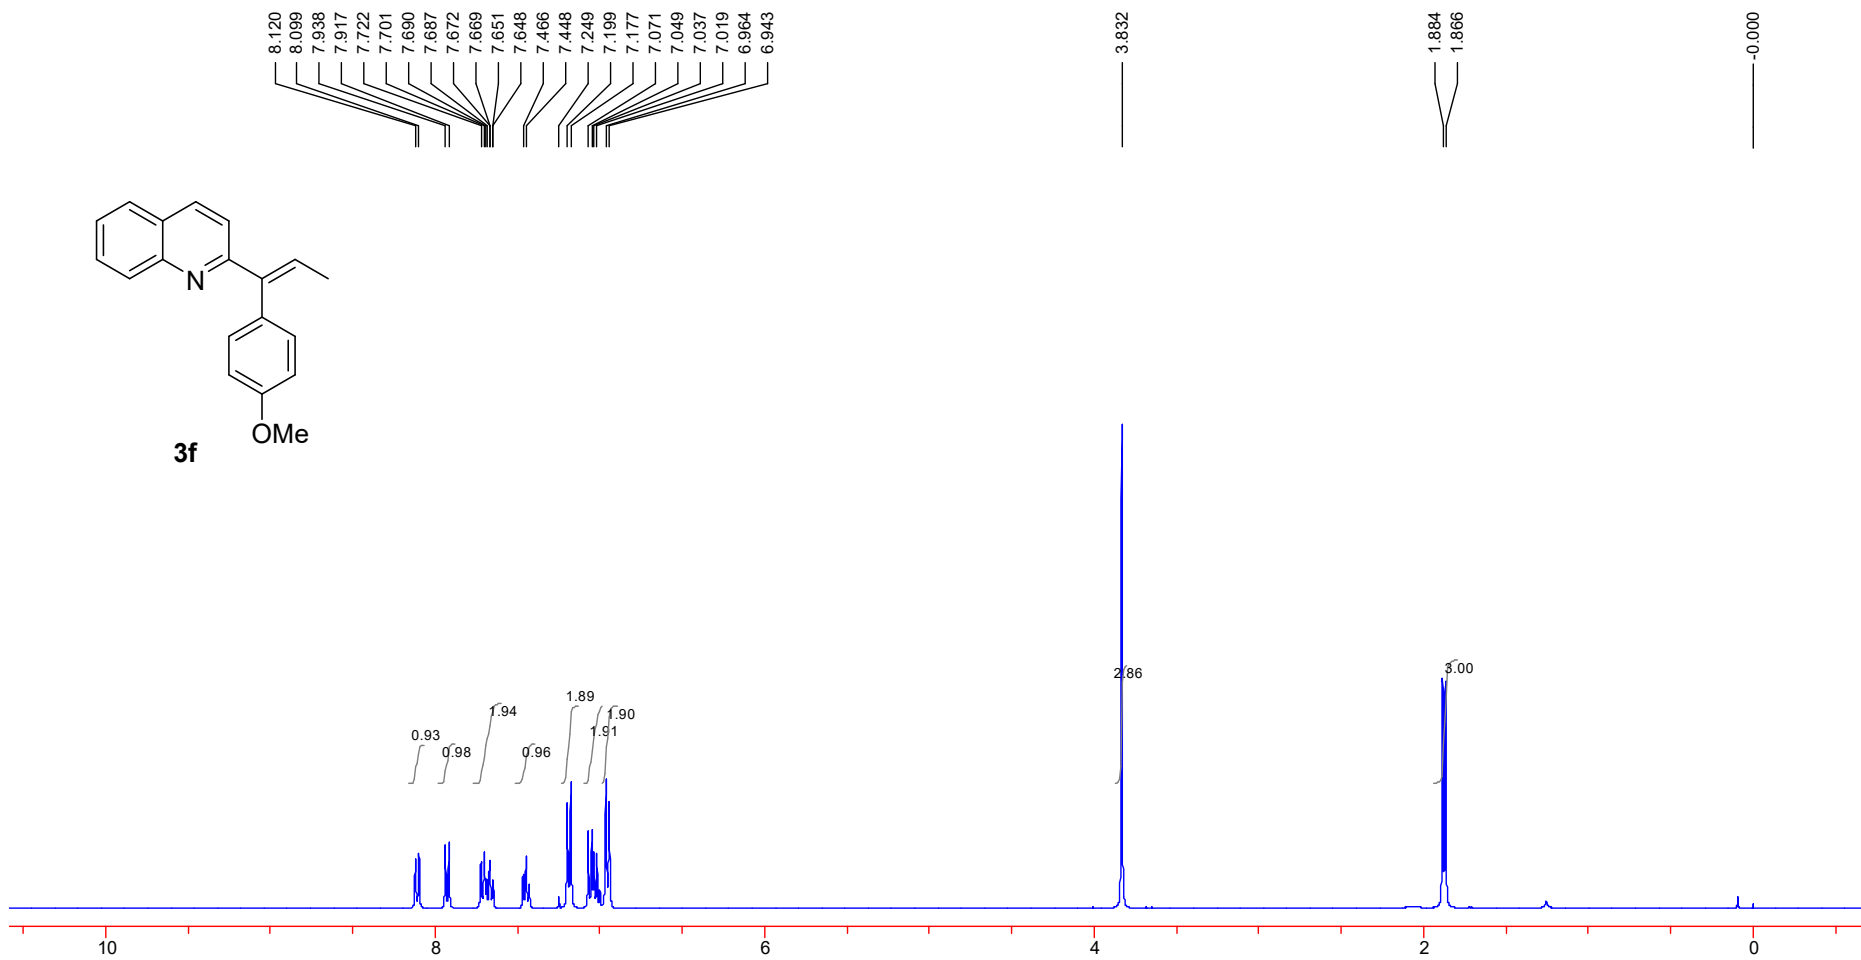

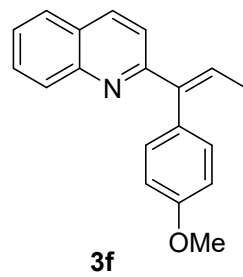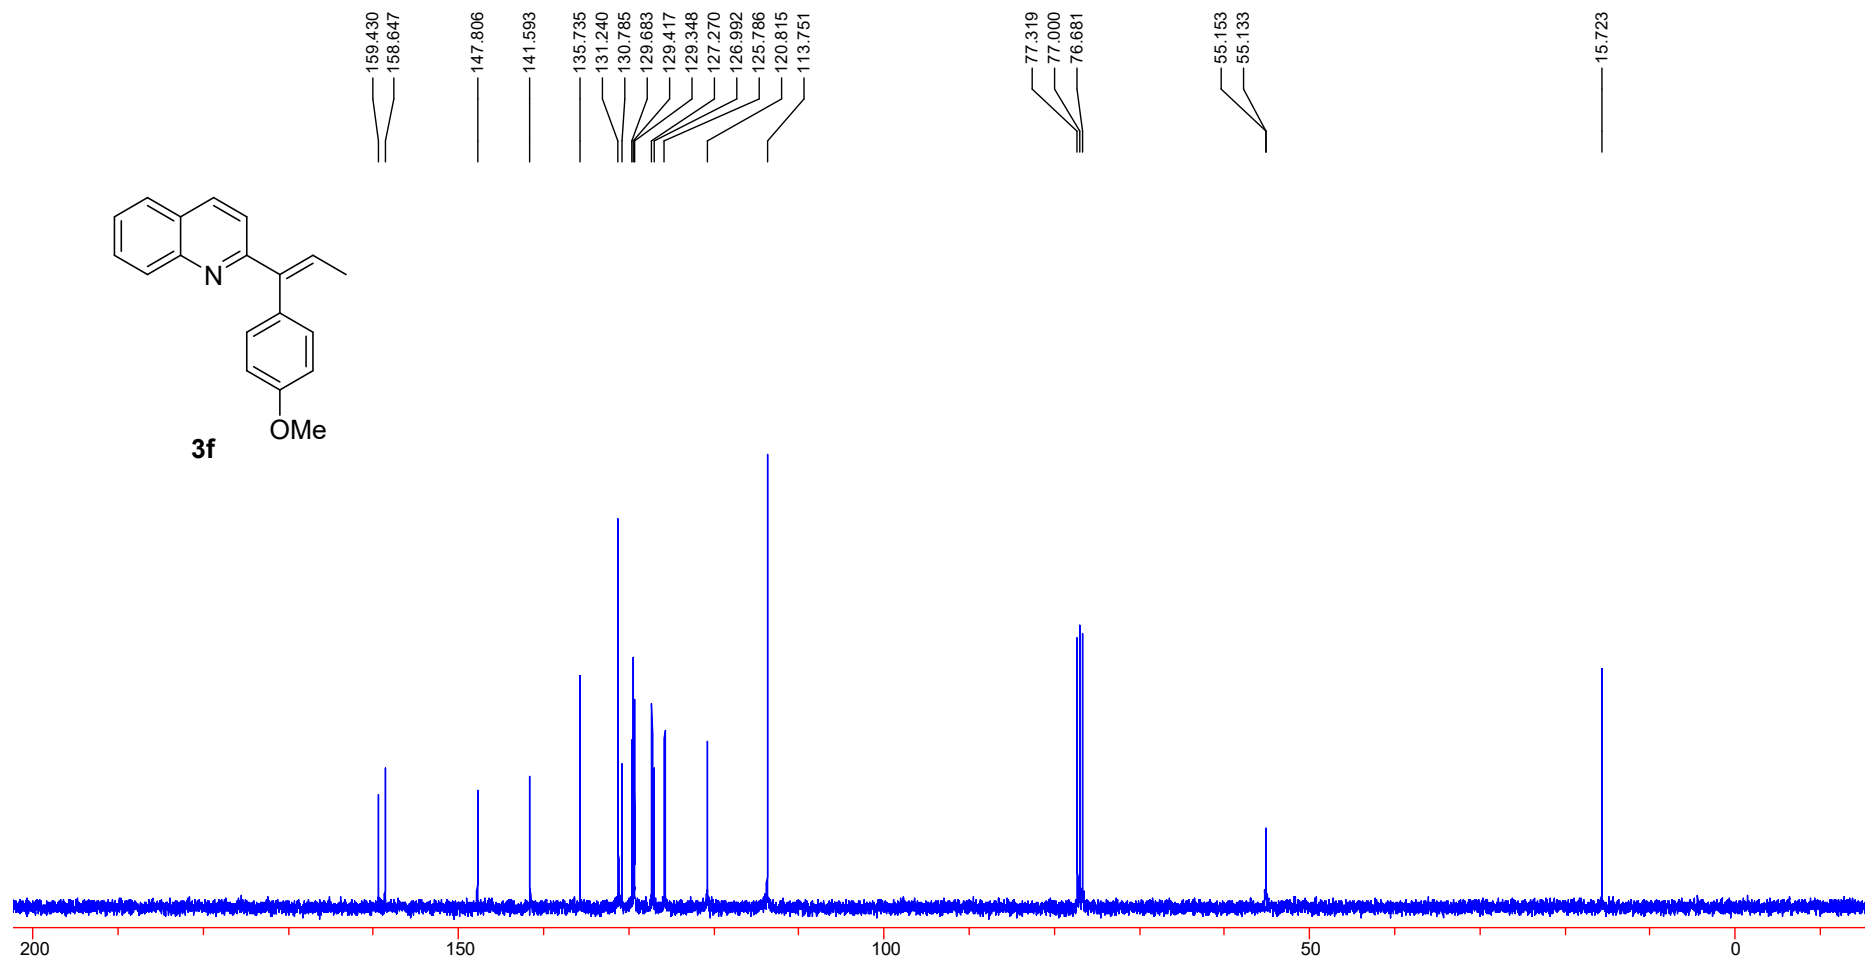

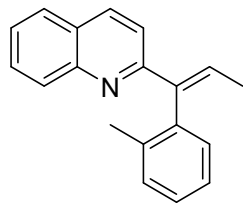

**3g**

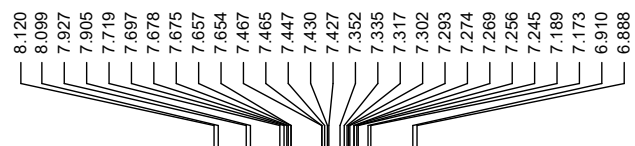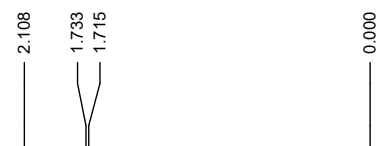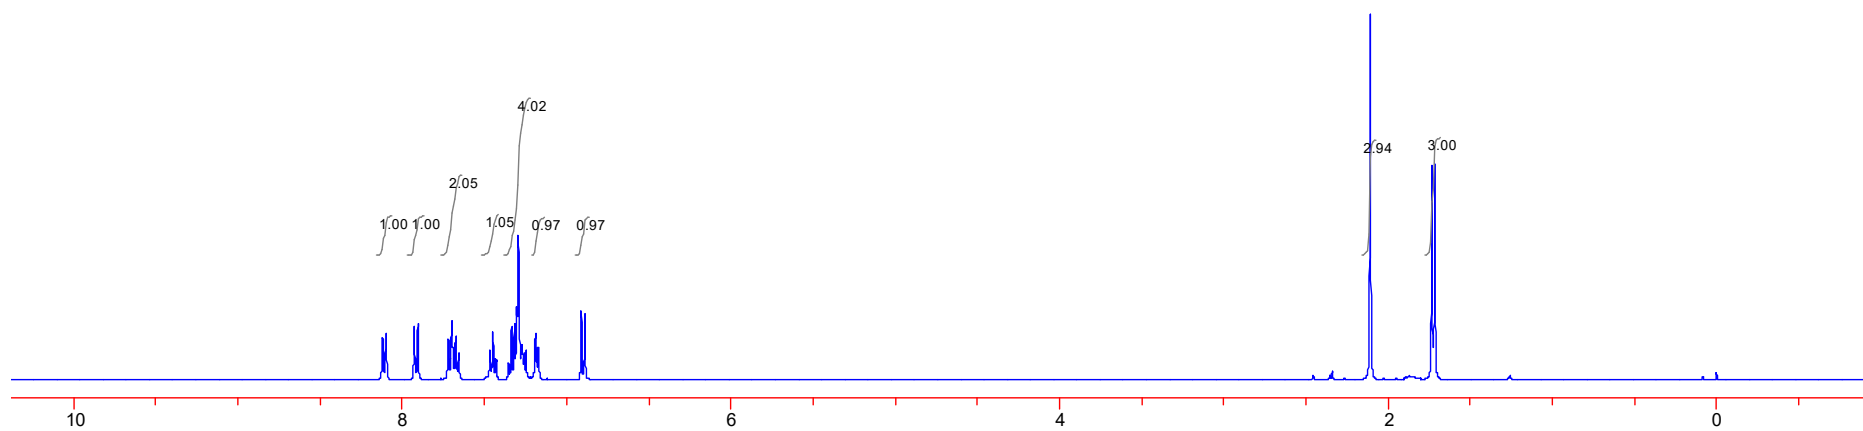

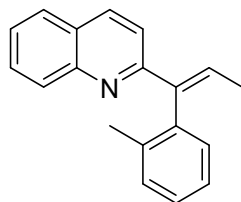

3g

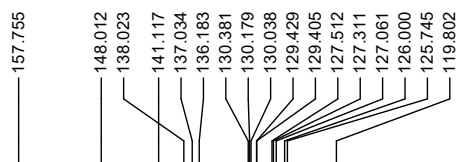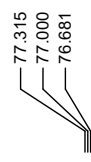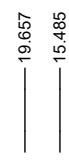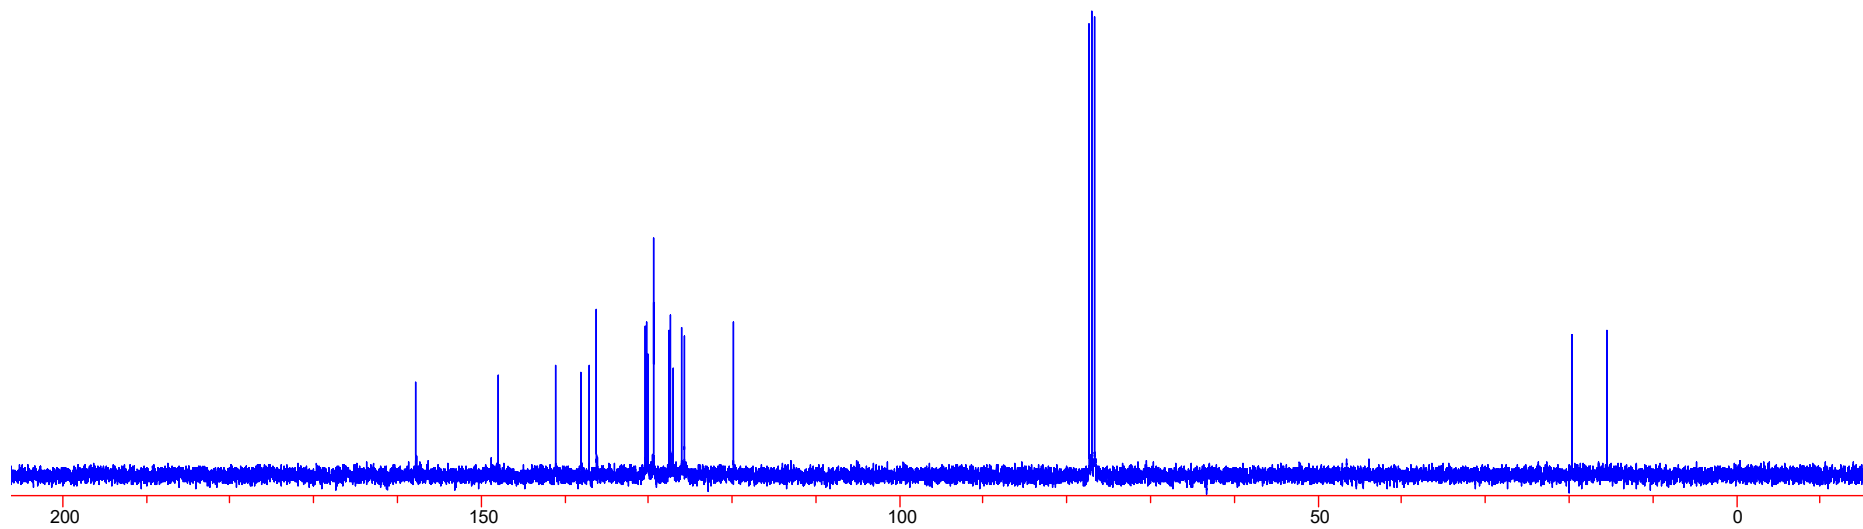

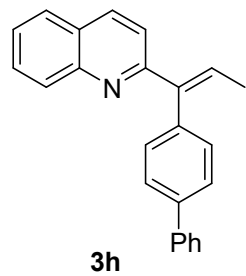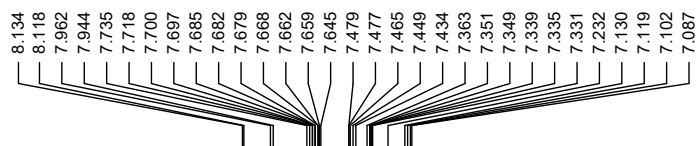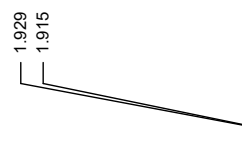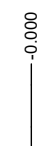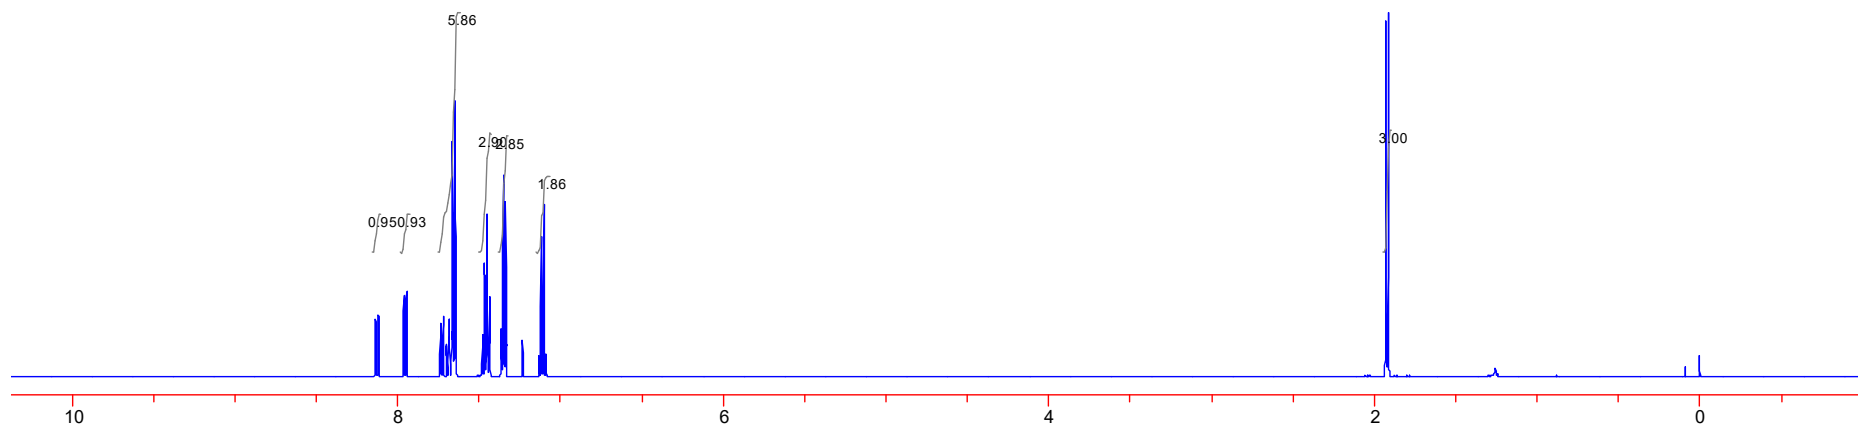

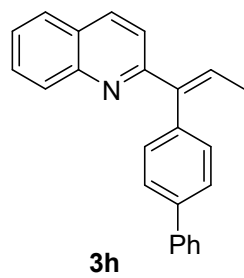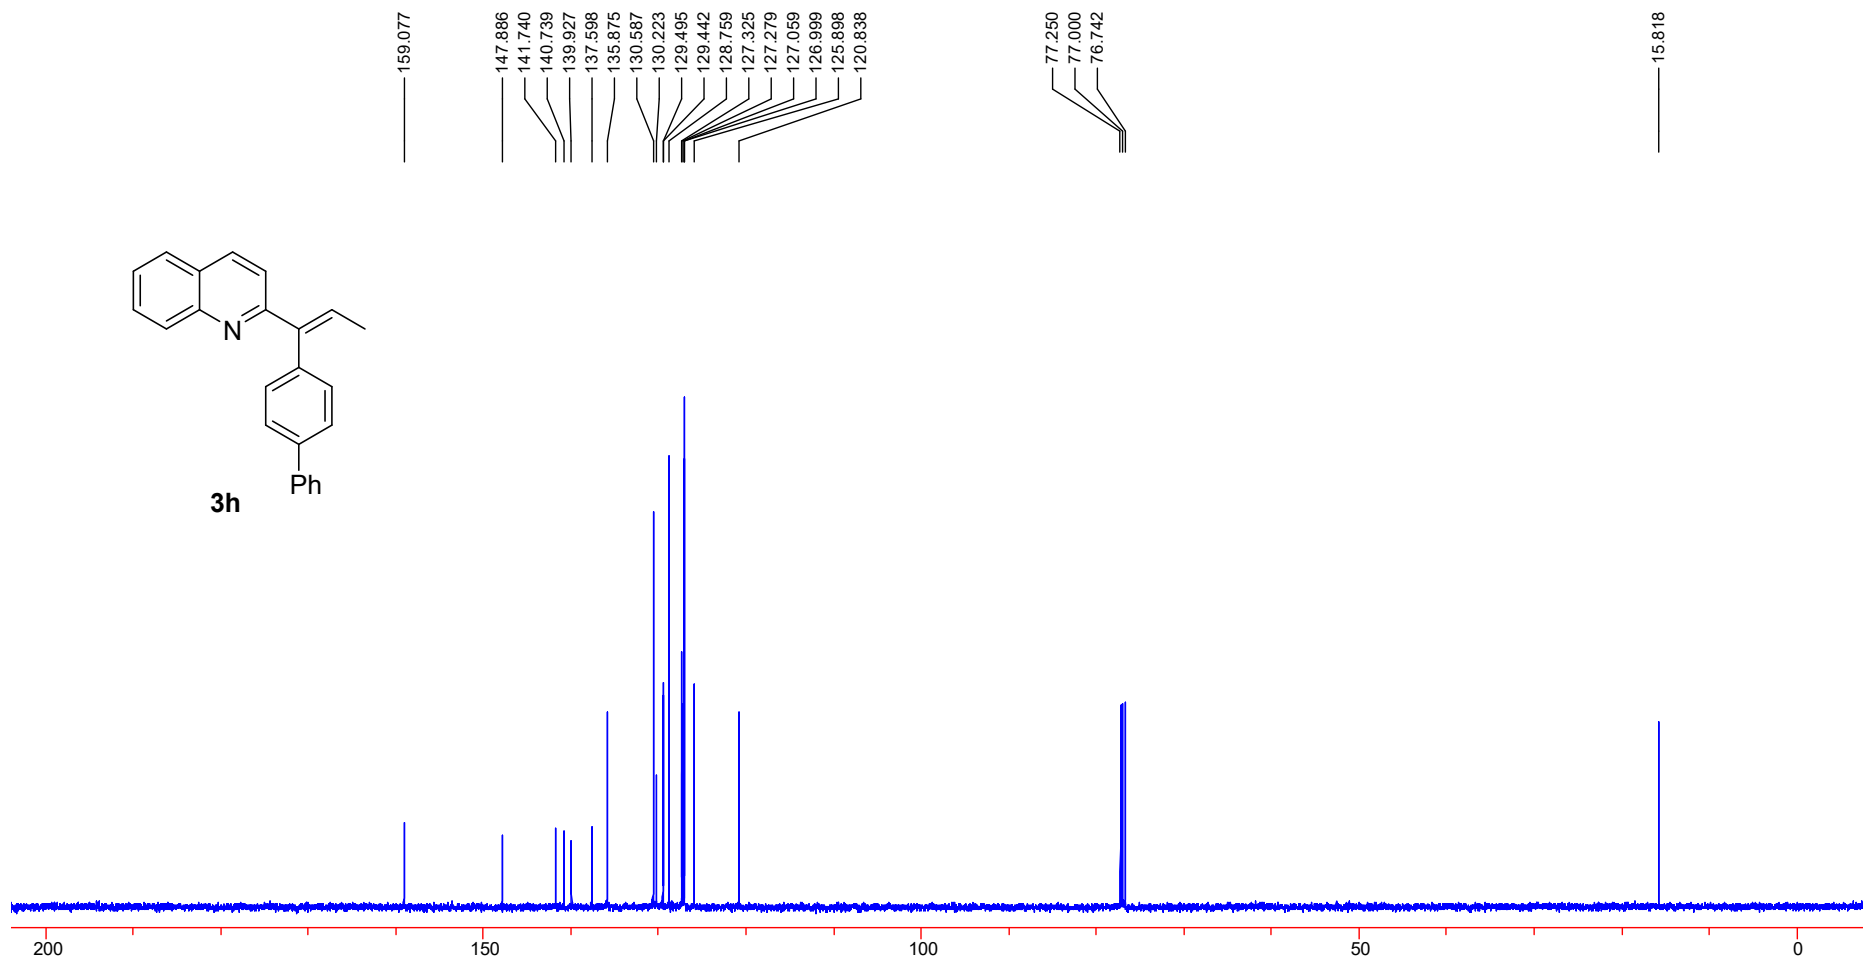

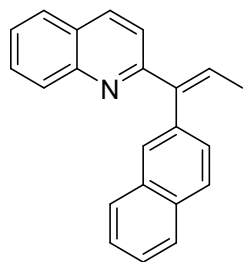

**3i**

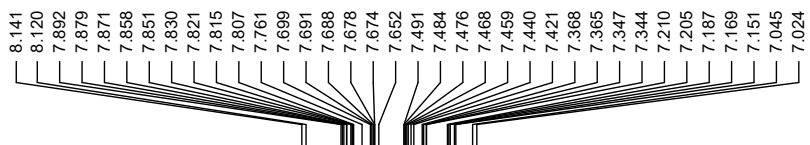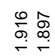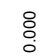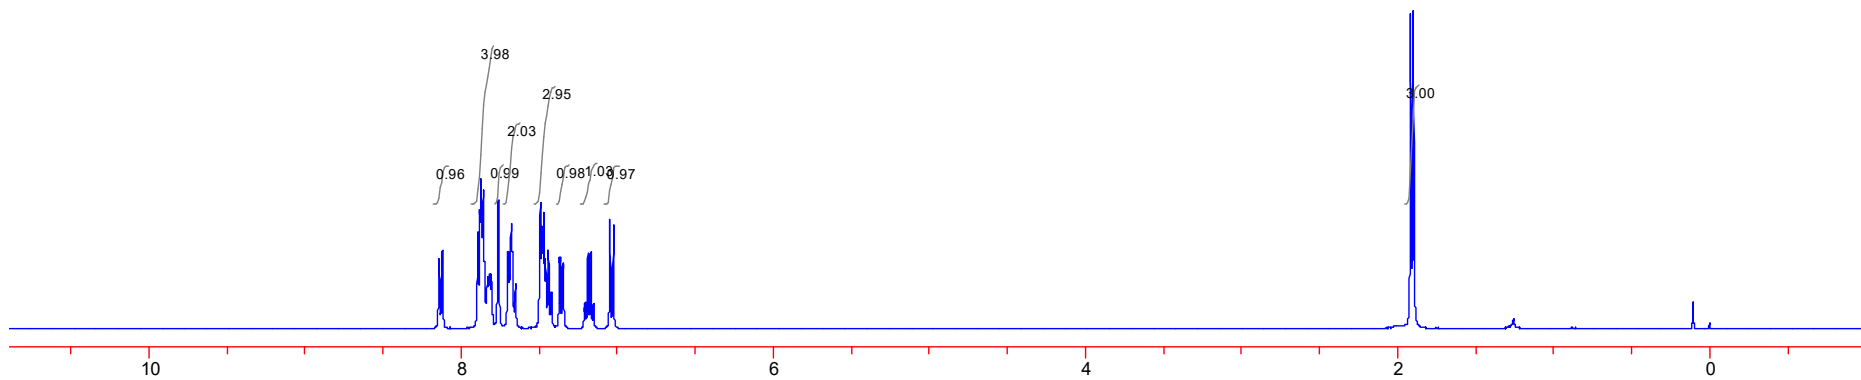

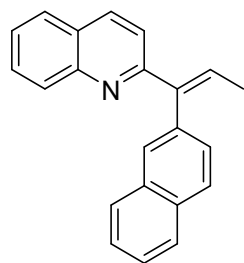

**3i**

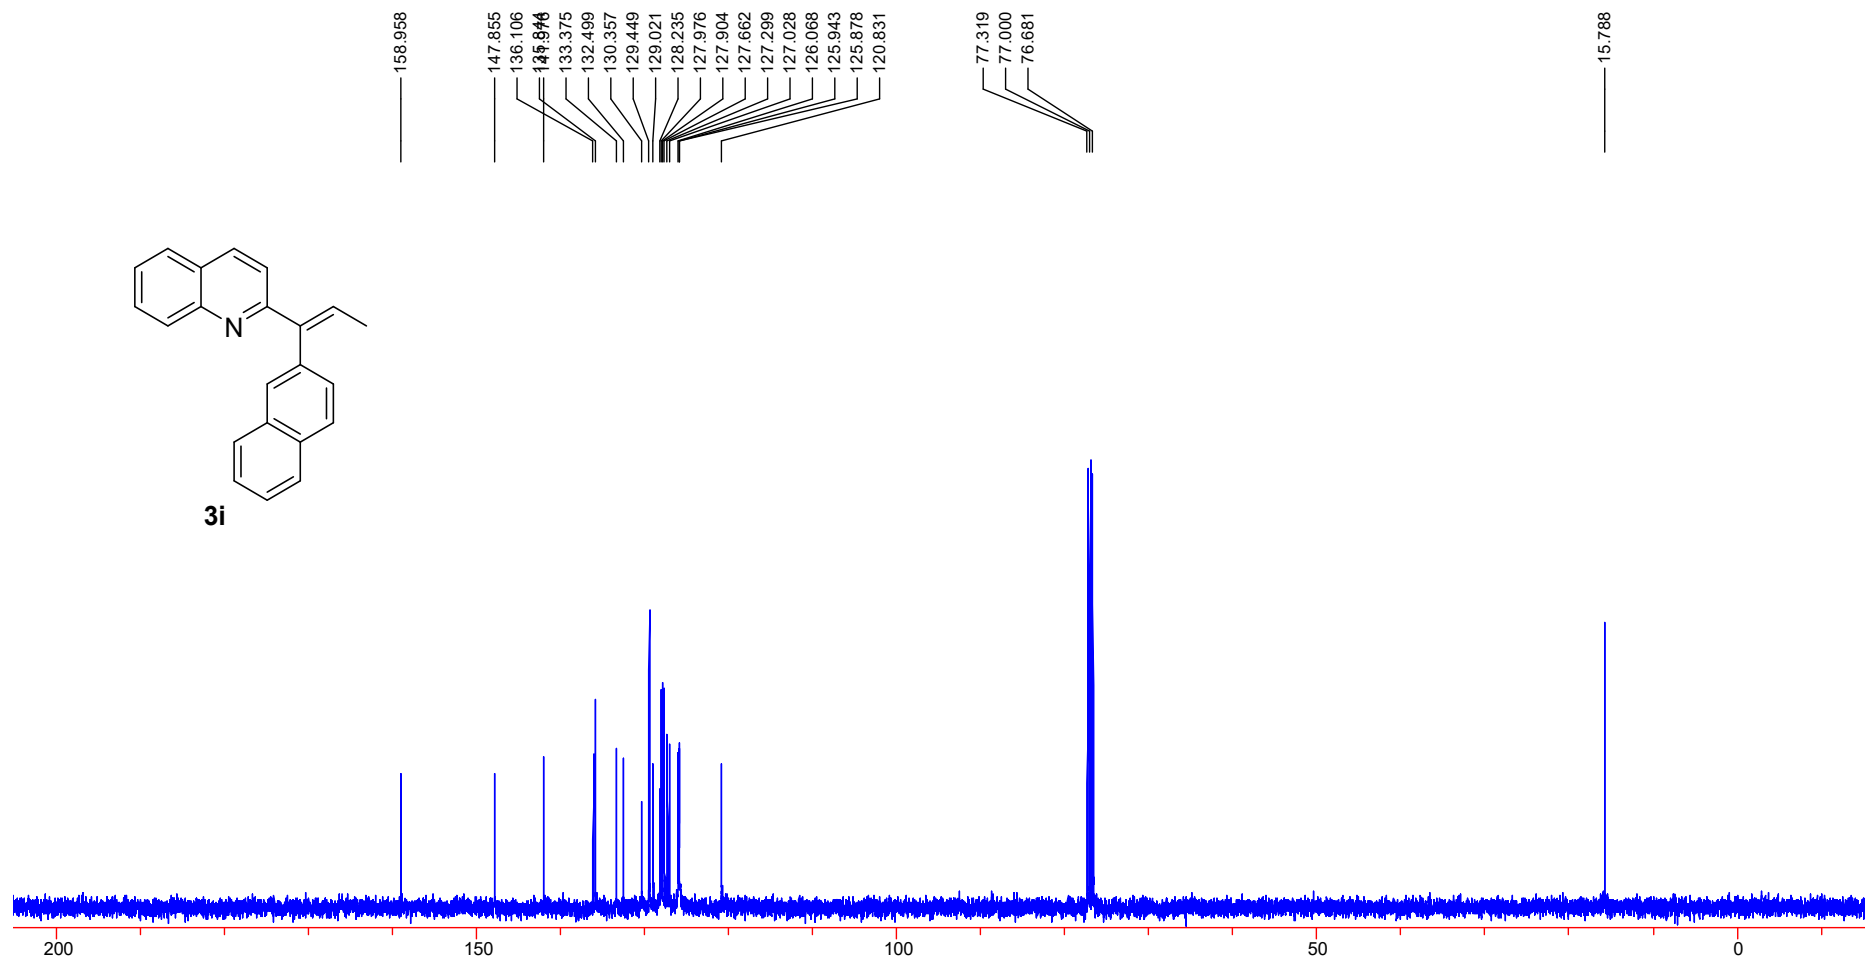



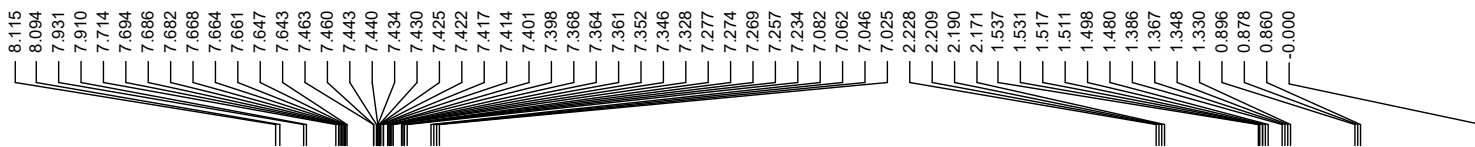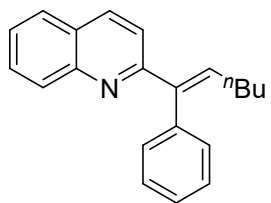

3j

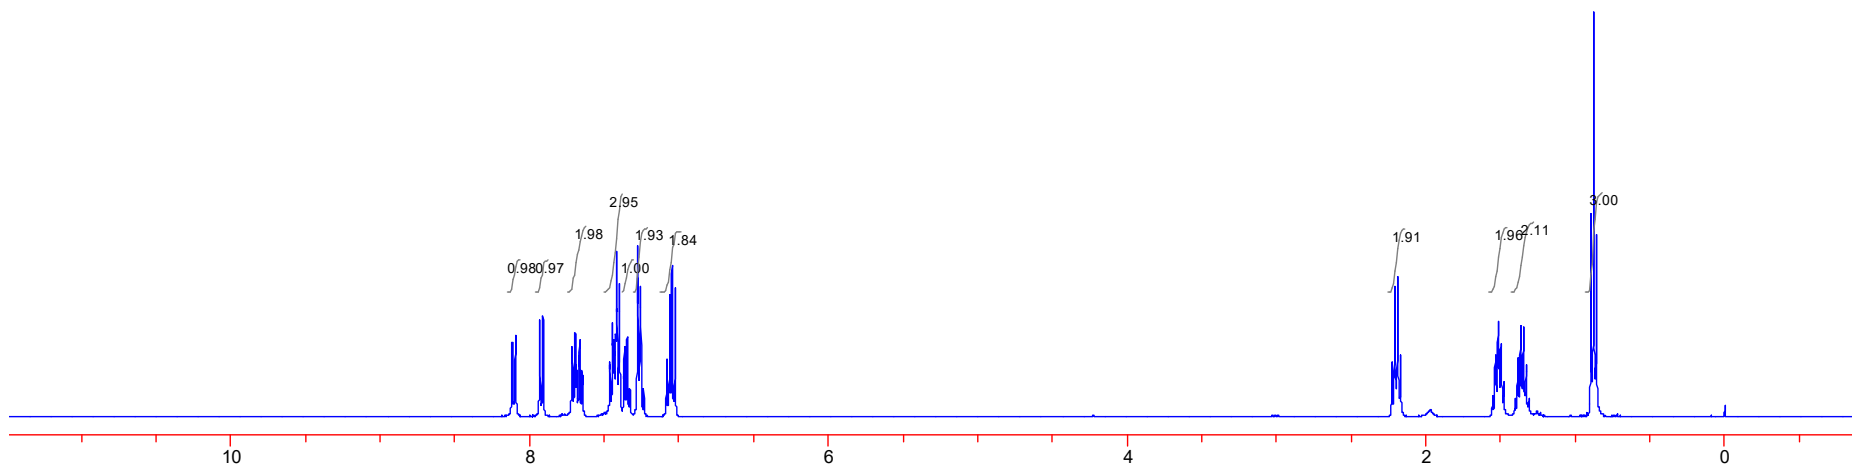

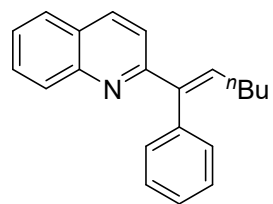

3j

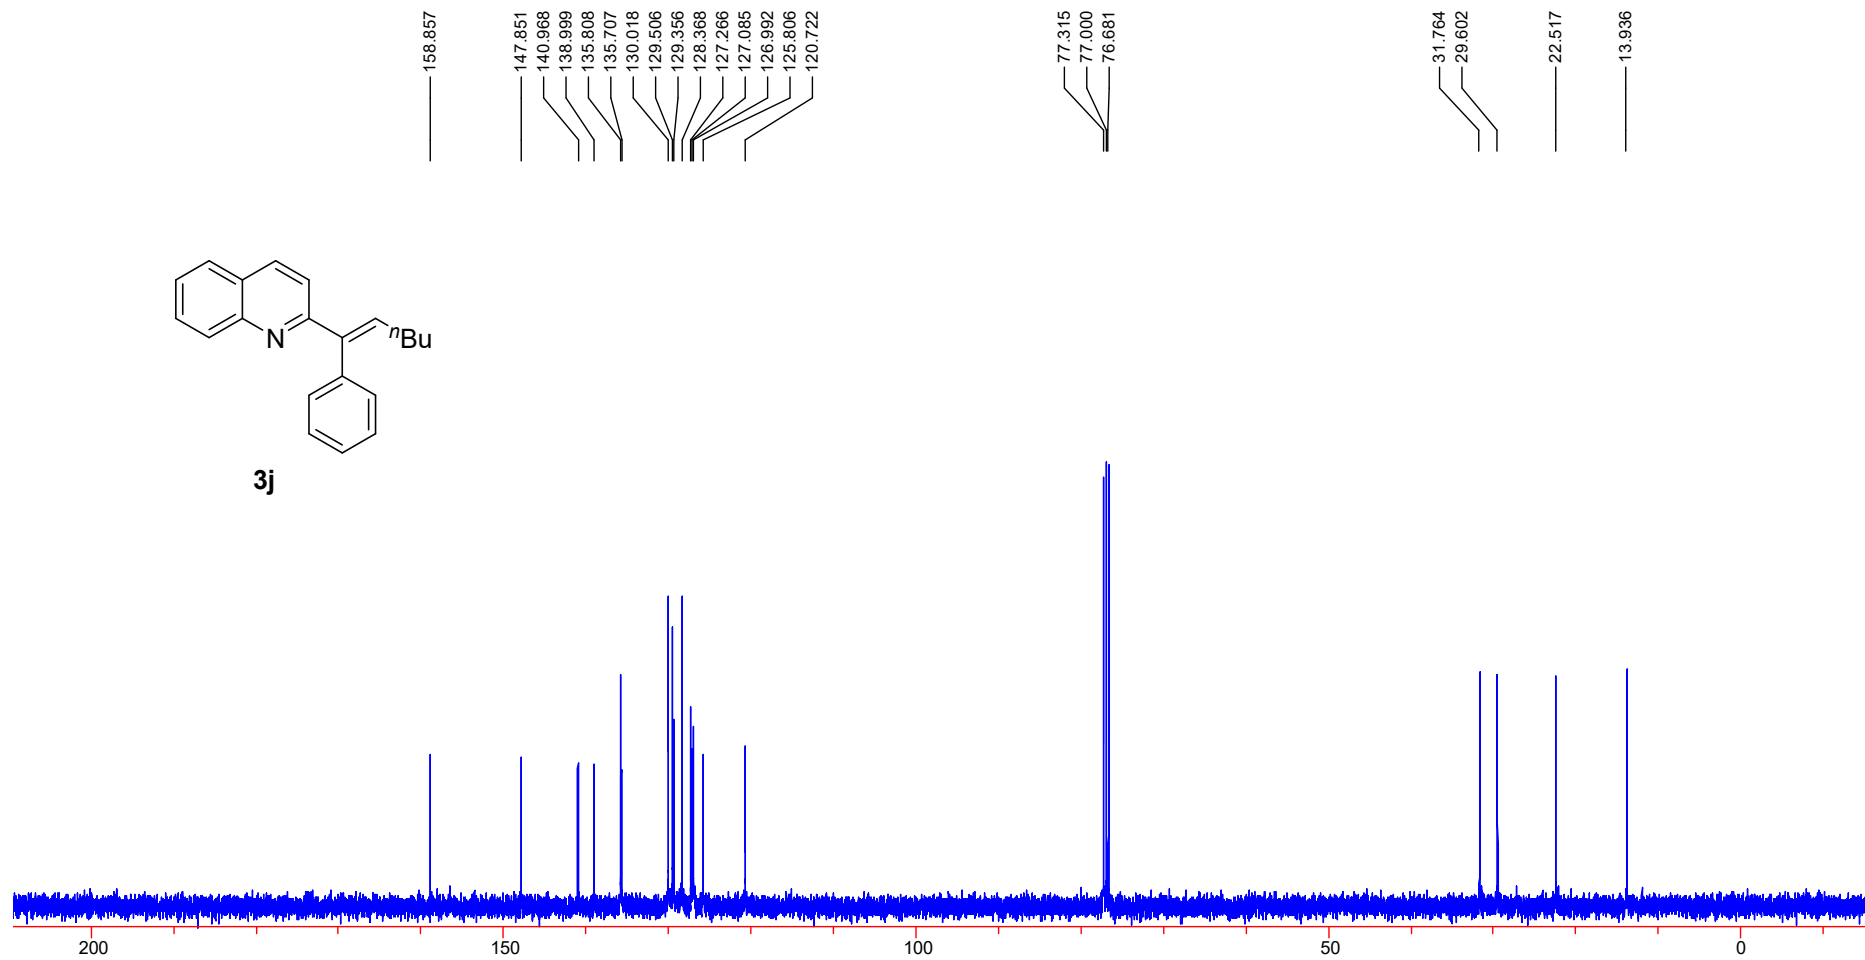

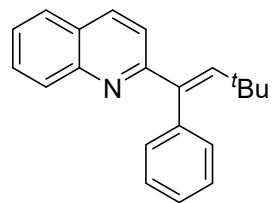

**3k**

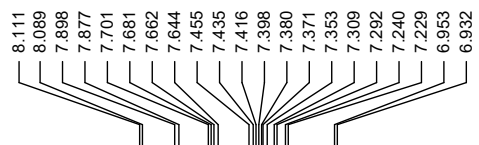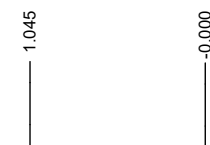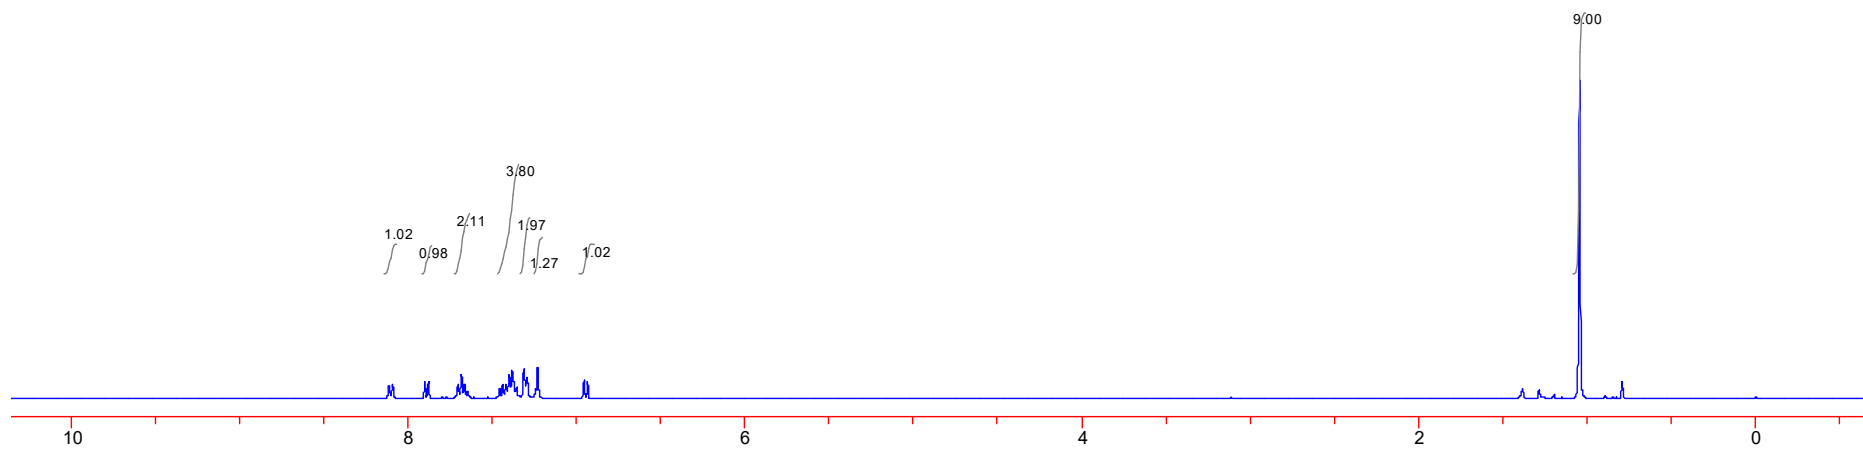

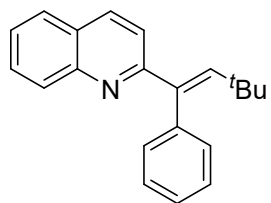

**3k**

159.385  
147.710  
144.575  
139.603  
138.343  
135.838  
130.684  
129.629  
129.310  
128.042  
127.215  
127.101  
126.858  
125.765  
120.269

77.319  
77.000  
76.681

34.065  
31.127

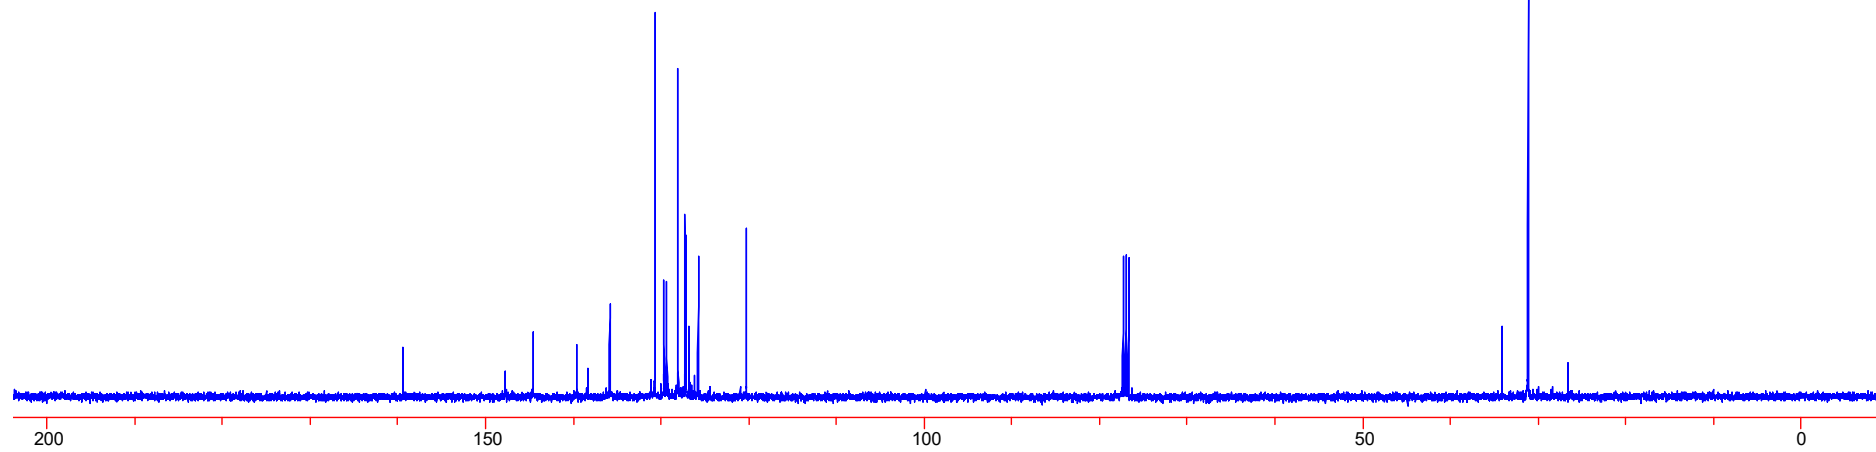

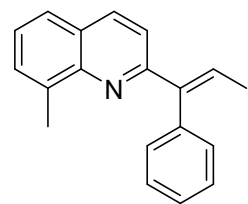

**3I**

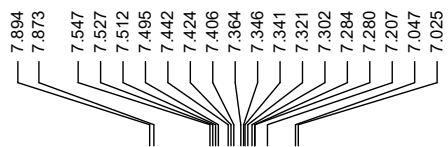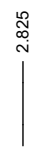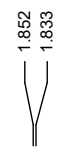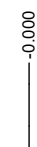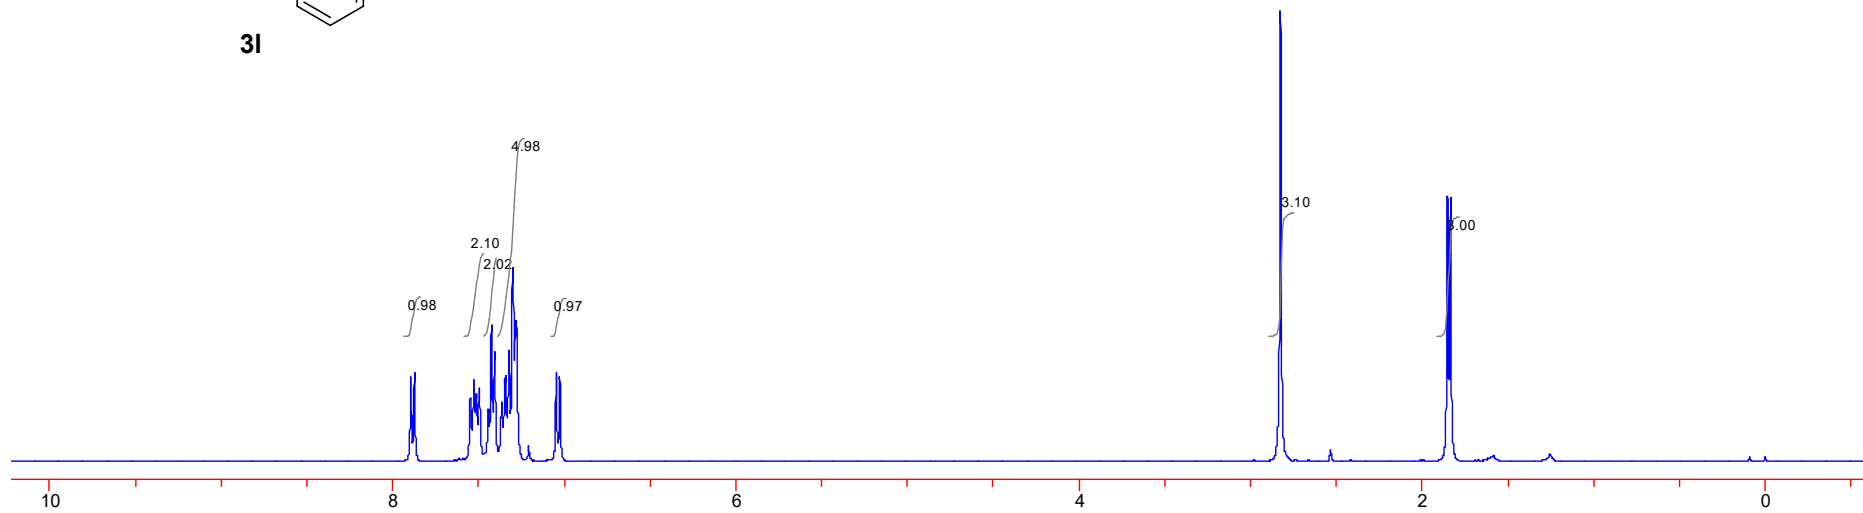

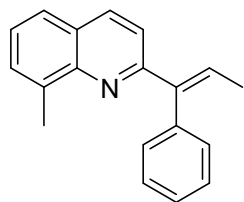

3l

157.021  
146.729  
142.227  
138.793  
137.240  
136.106  
130.216  
129.465  
128.307  
127.012  
126.851  
125.536  
125.253  
119.860

77.319  
77.000  
76.681

17.825  
17.809  
15.743

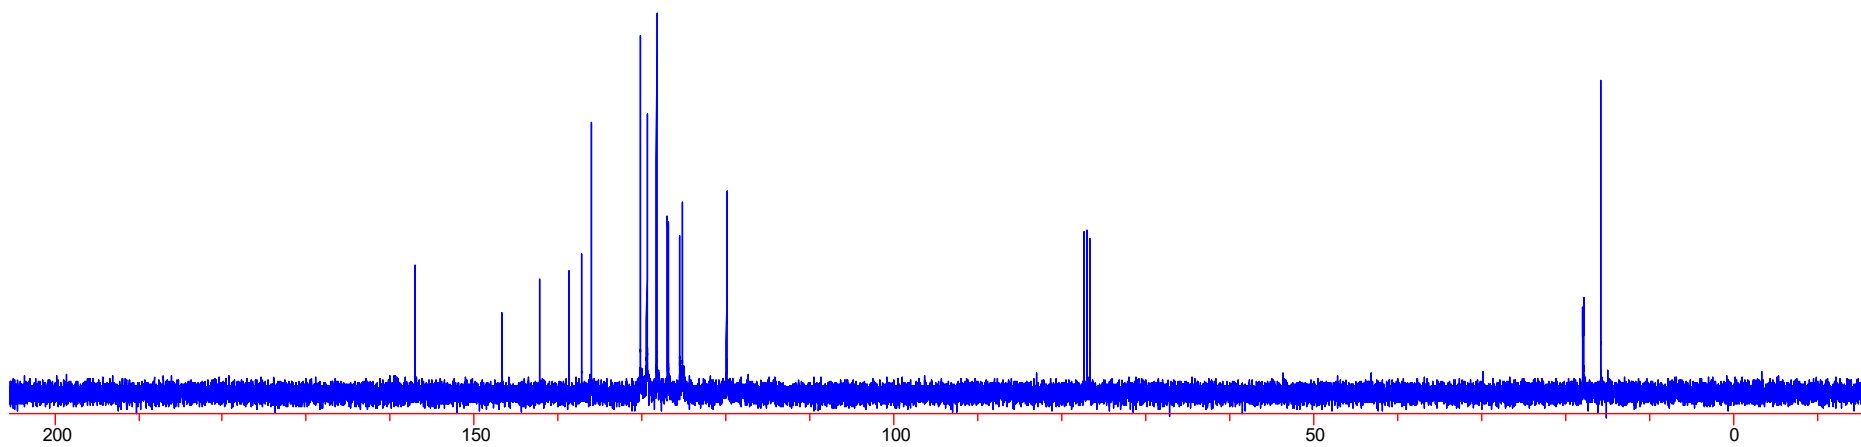

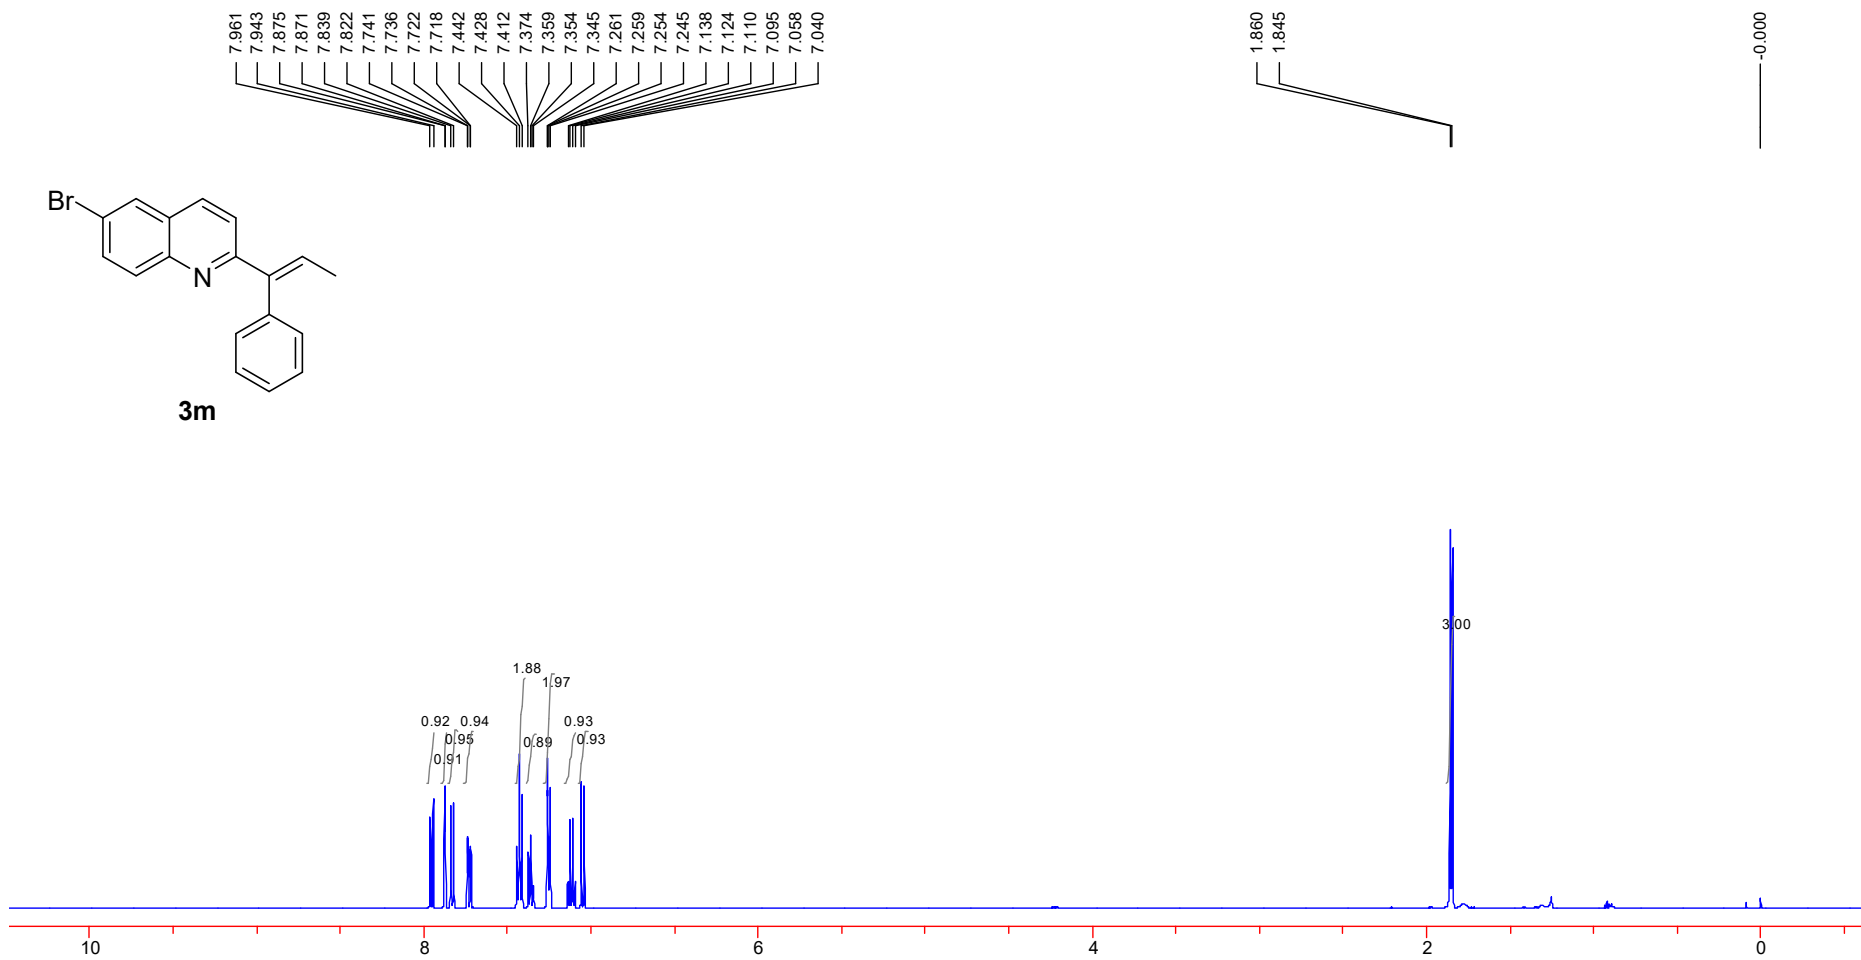

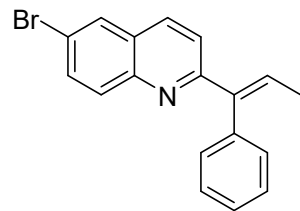

3m

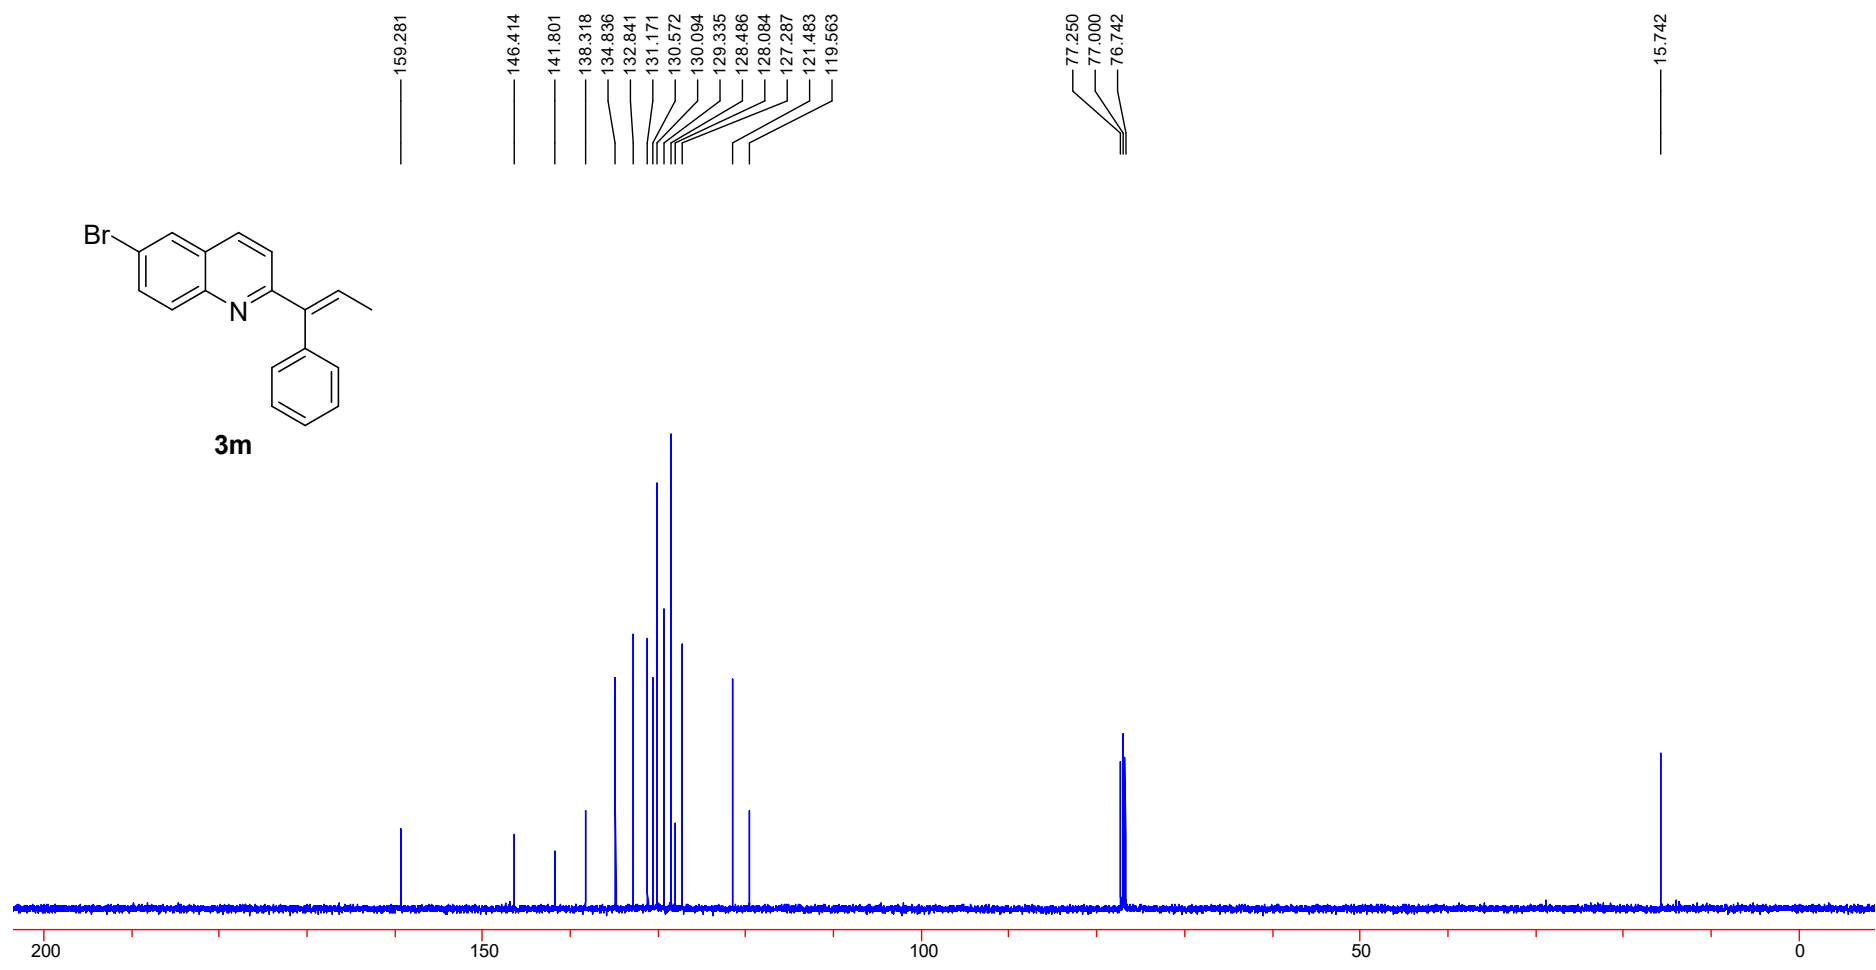



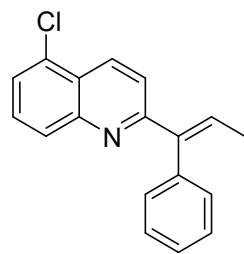

**3n**

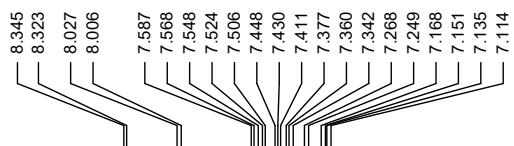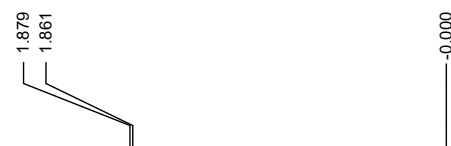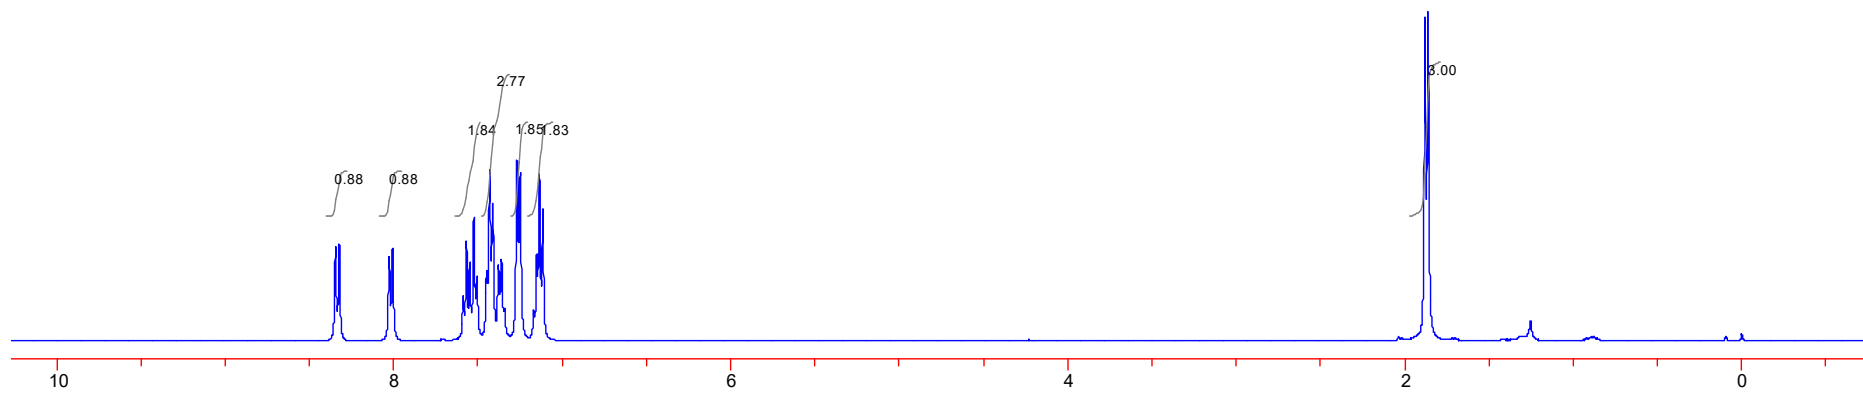

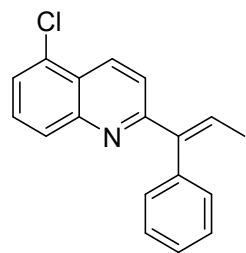

**3n**

159.539  
148.484  
141.609  
138.220  
132.709  
131.047  
130.873  
130.074  
129.078  
128.618  
128.469  
127.295  
125.818  
125.063  
121.481

77.315  
77.000  
76.681

15.759

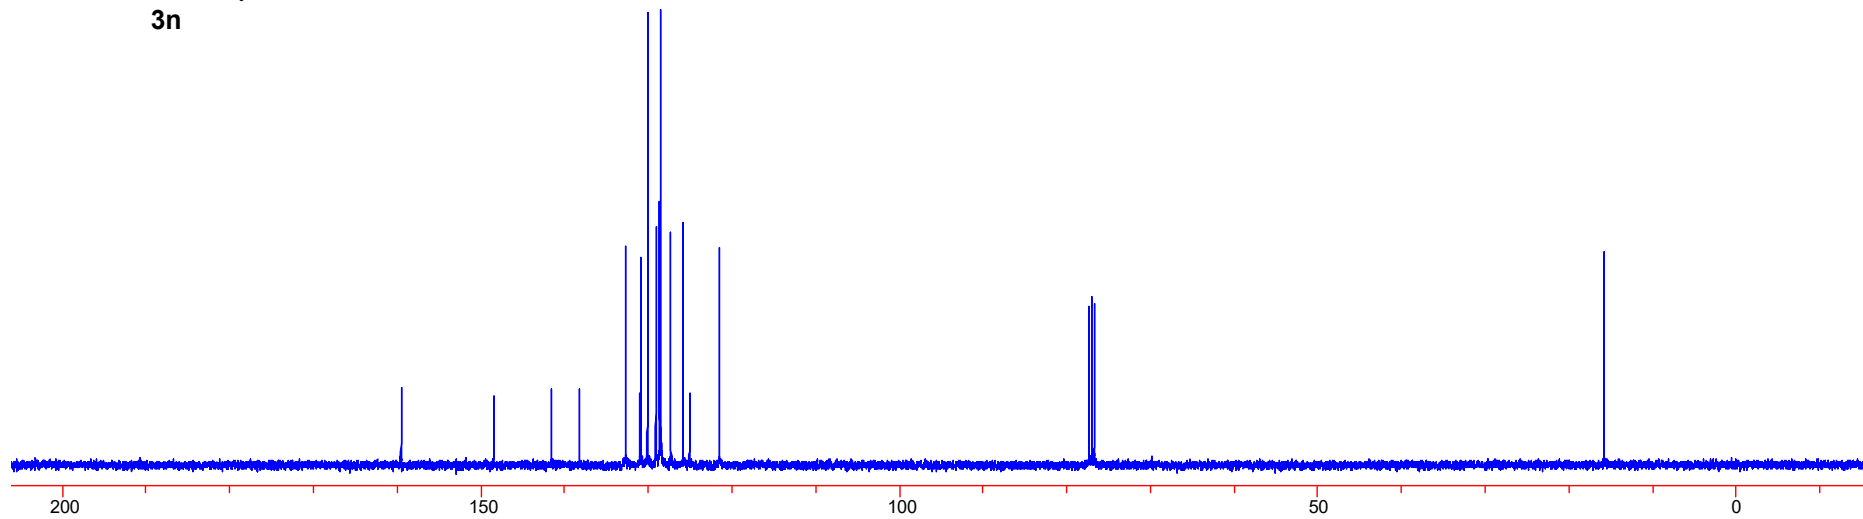

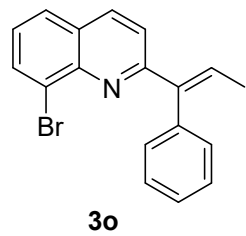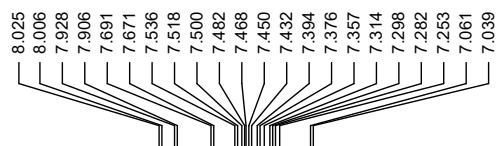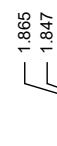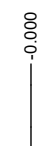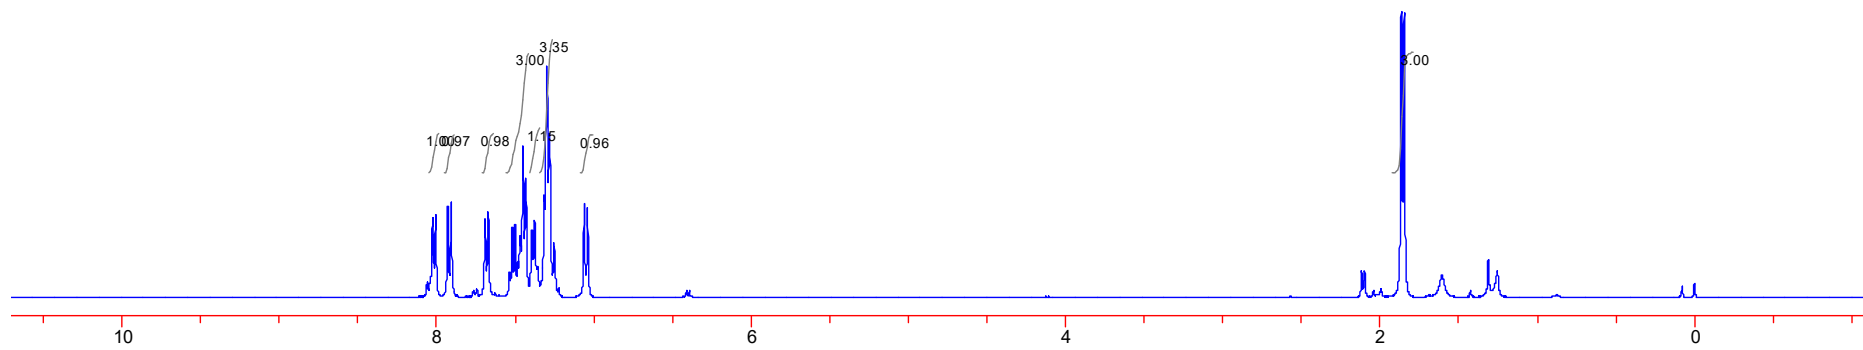

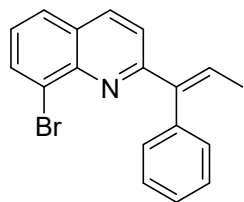

**3o**

158.930  
144.647  
141.355  
138.301  
136.514  
133.080  
131.466  
130.199  
128.513  
128.190  
127.234  
126.137  
125.112  
121.130

77.319  
77.000  
76.685

15.868

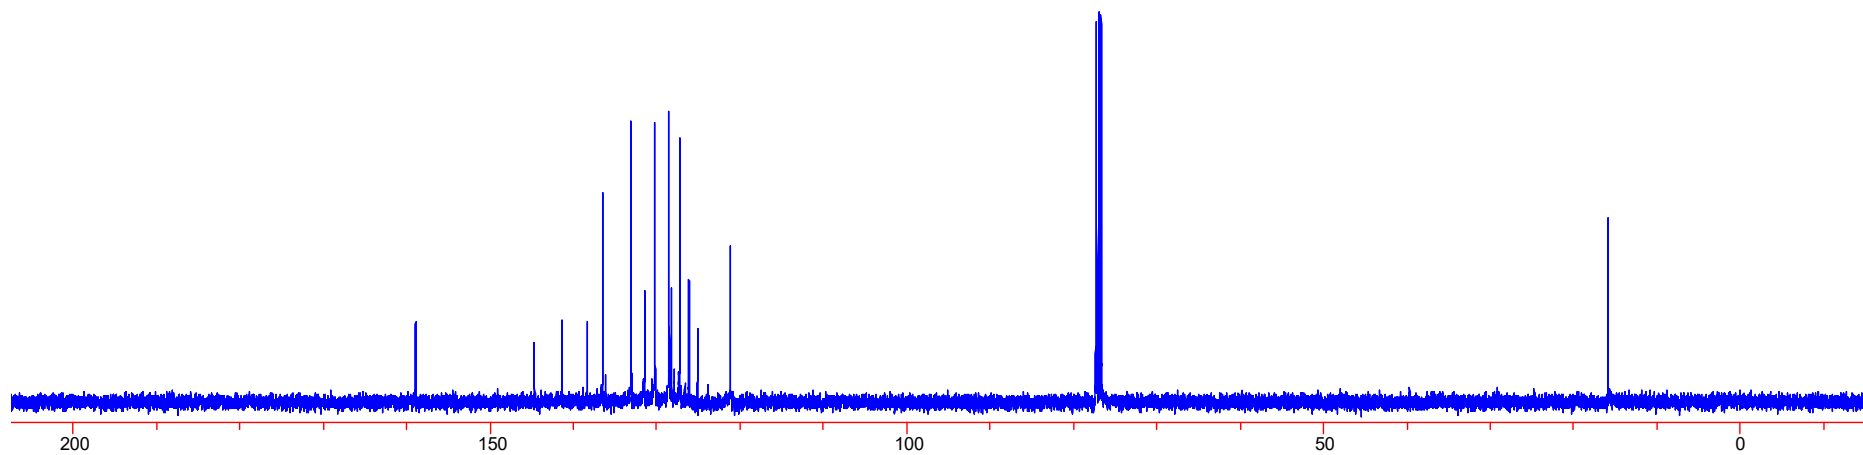

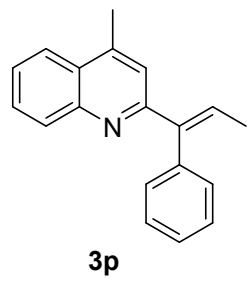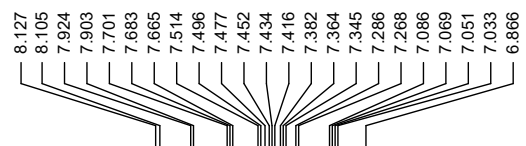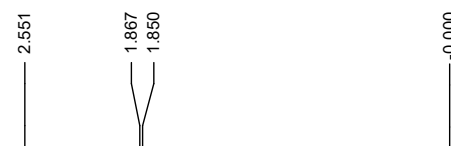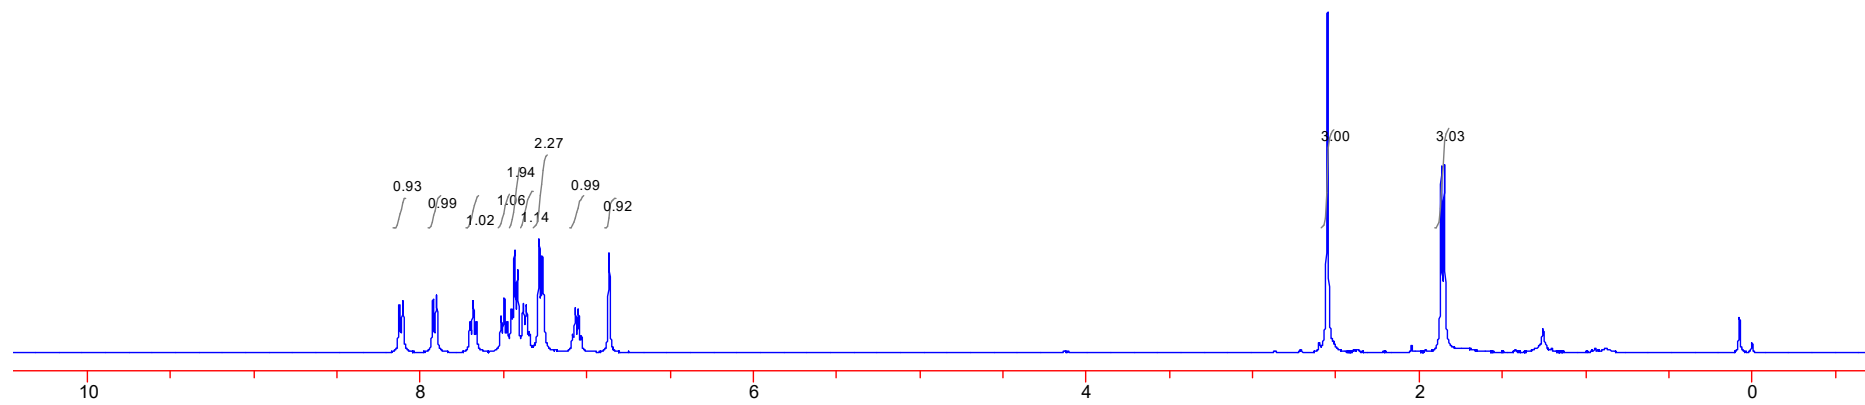

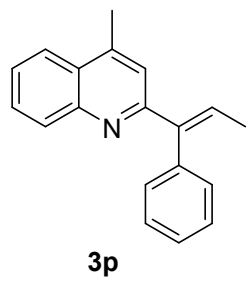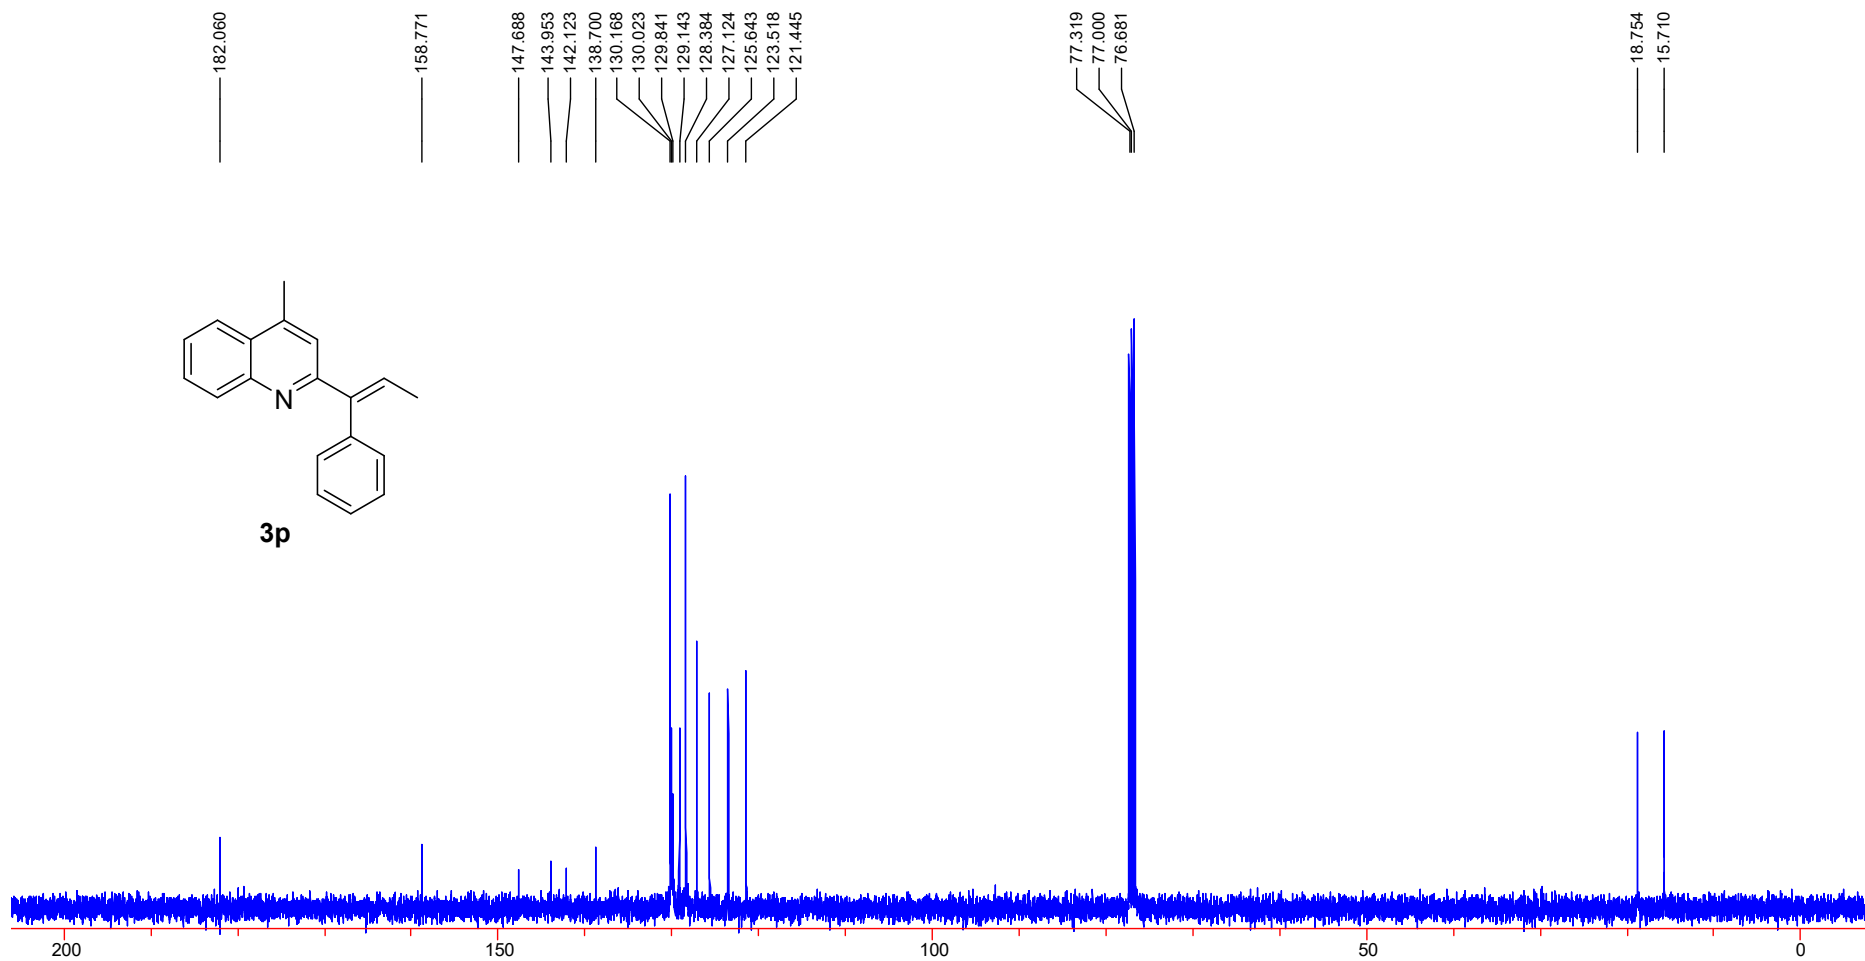

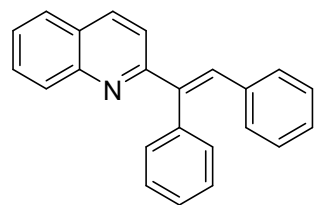

5a

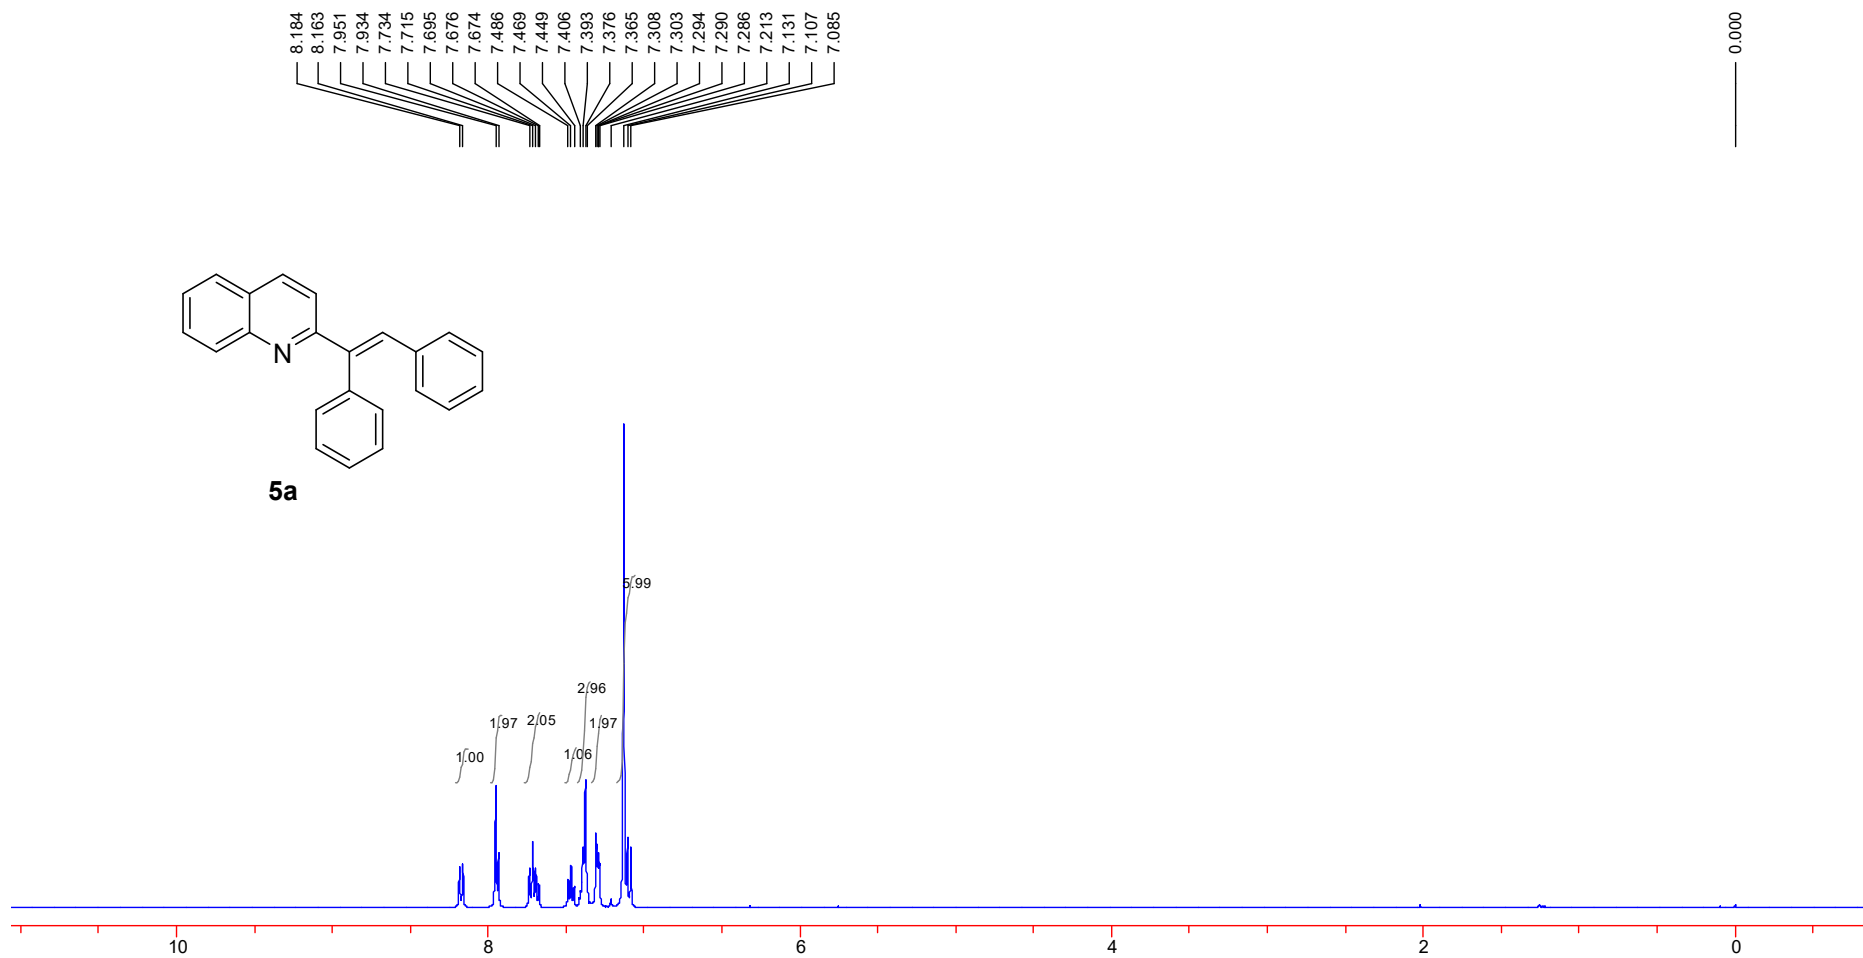

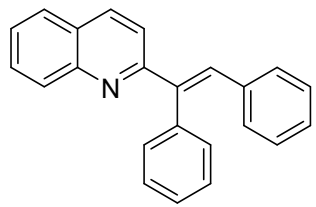

5a

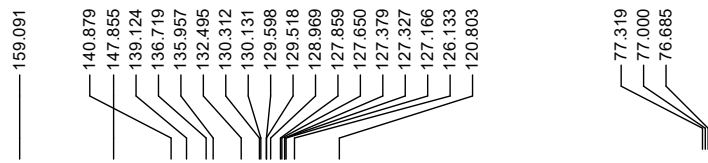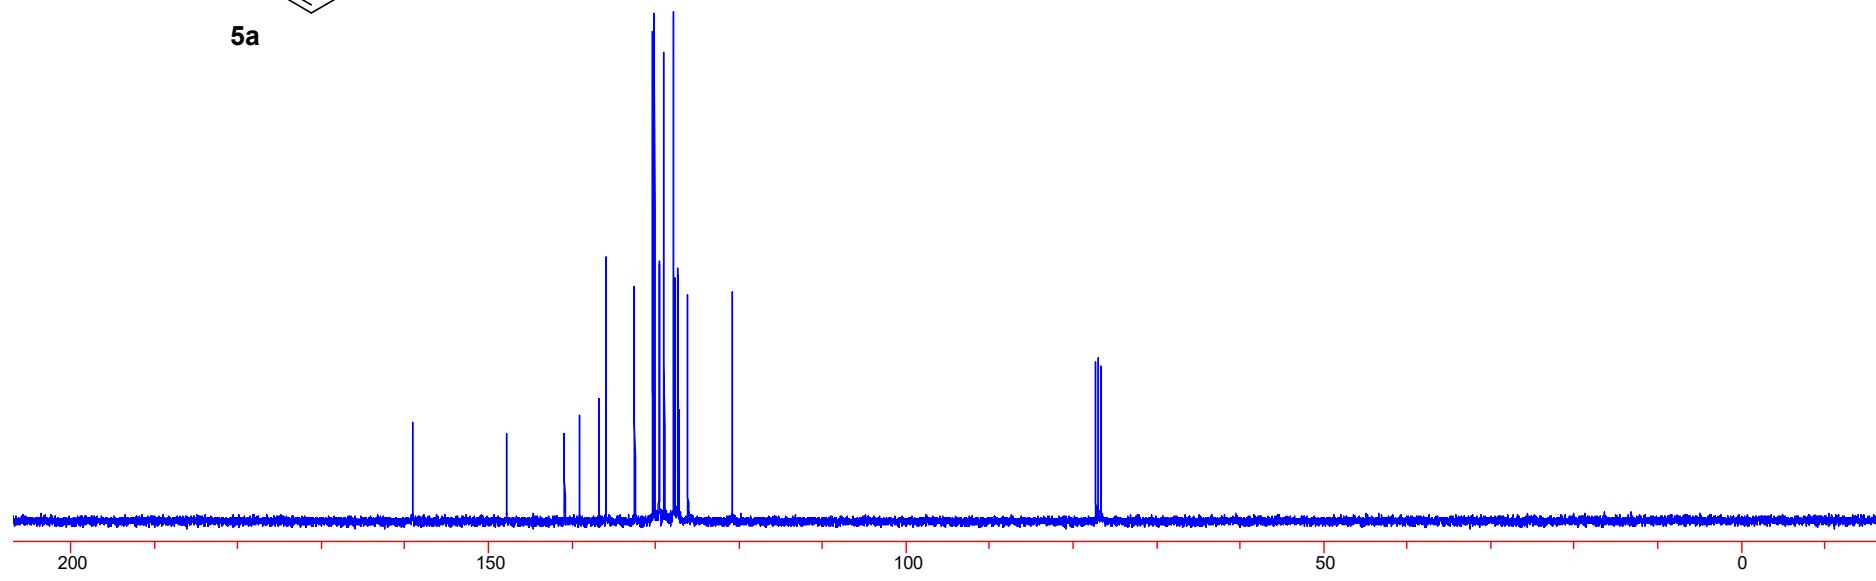



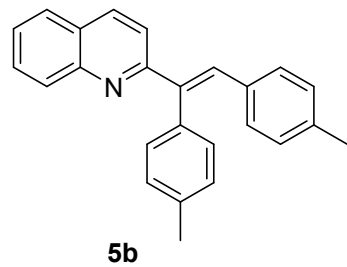

8.175  
8.154  
7.930  
7.909  
7.885  
7.716  
7.696  
7.682  
7.679  
7.661  
7.658  
7.468  
7.466  
7.448  
7.431  
7.428  
7.212  
7.207  
7.189  
7.175  
7.170  
7.168  
7.107  
7.085  
7.059  
7.039  
6.963  
6.943

2.397  
2.253

-0.000

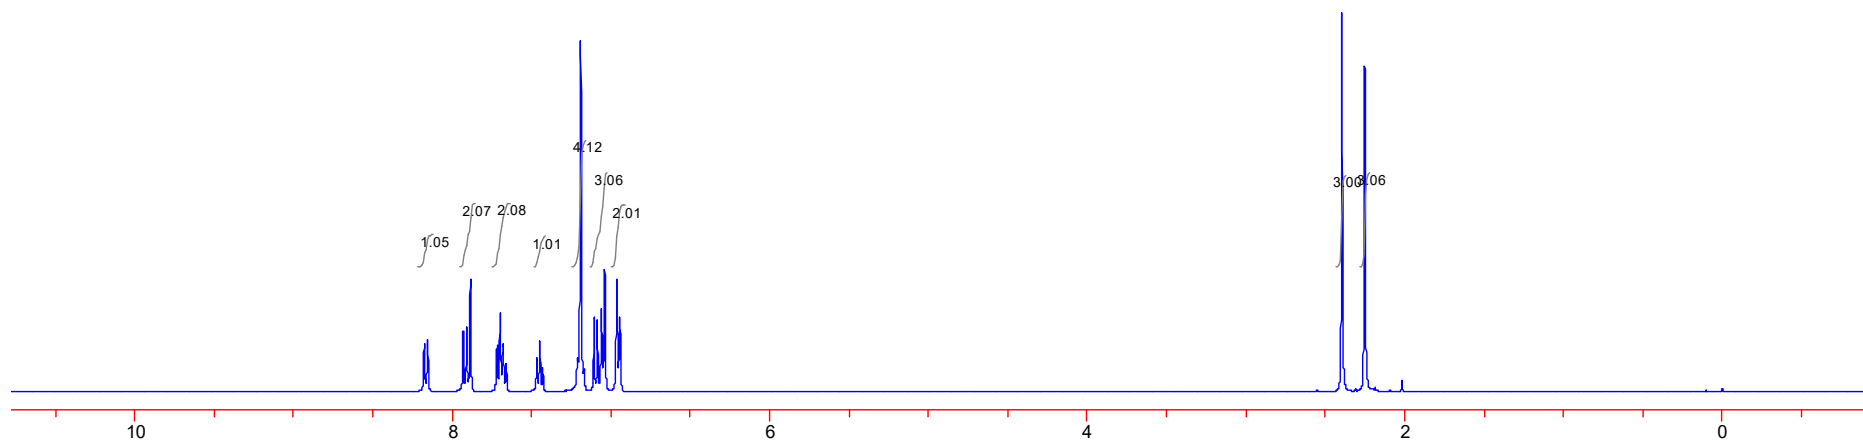

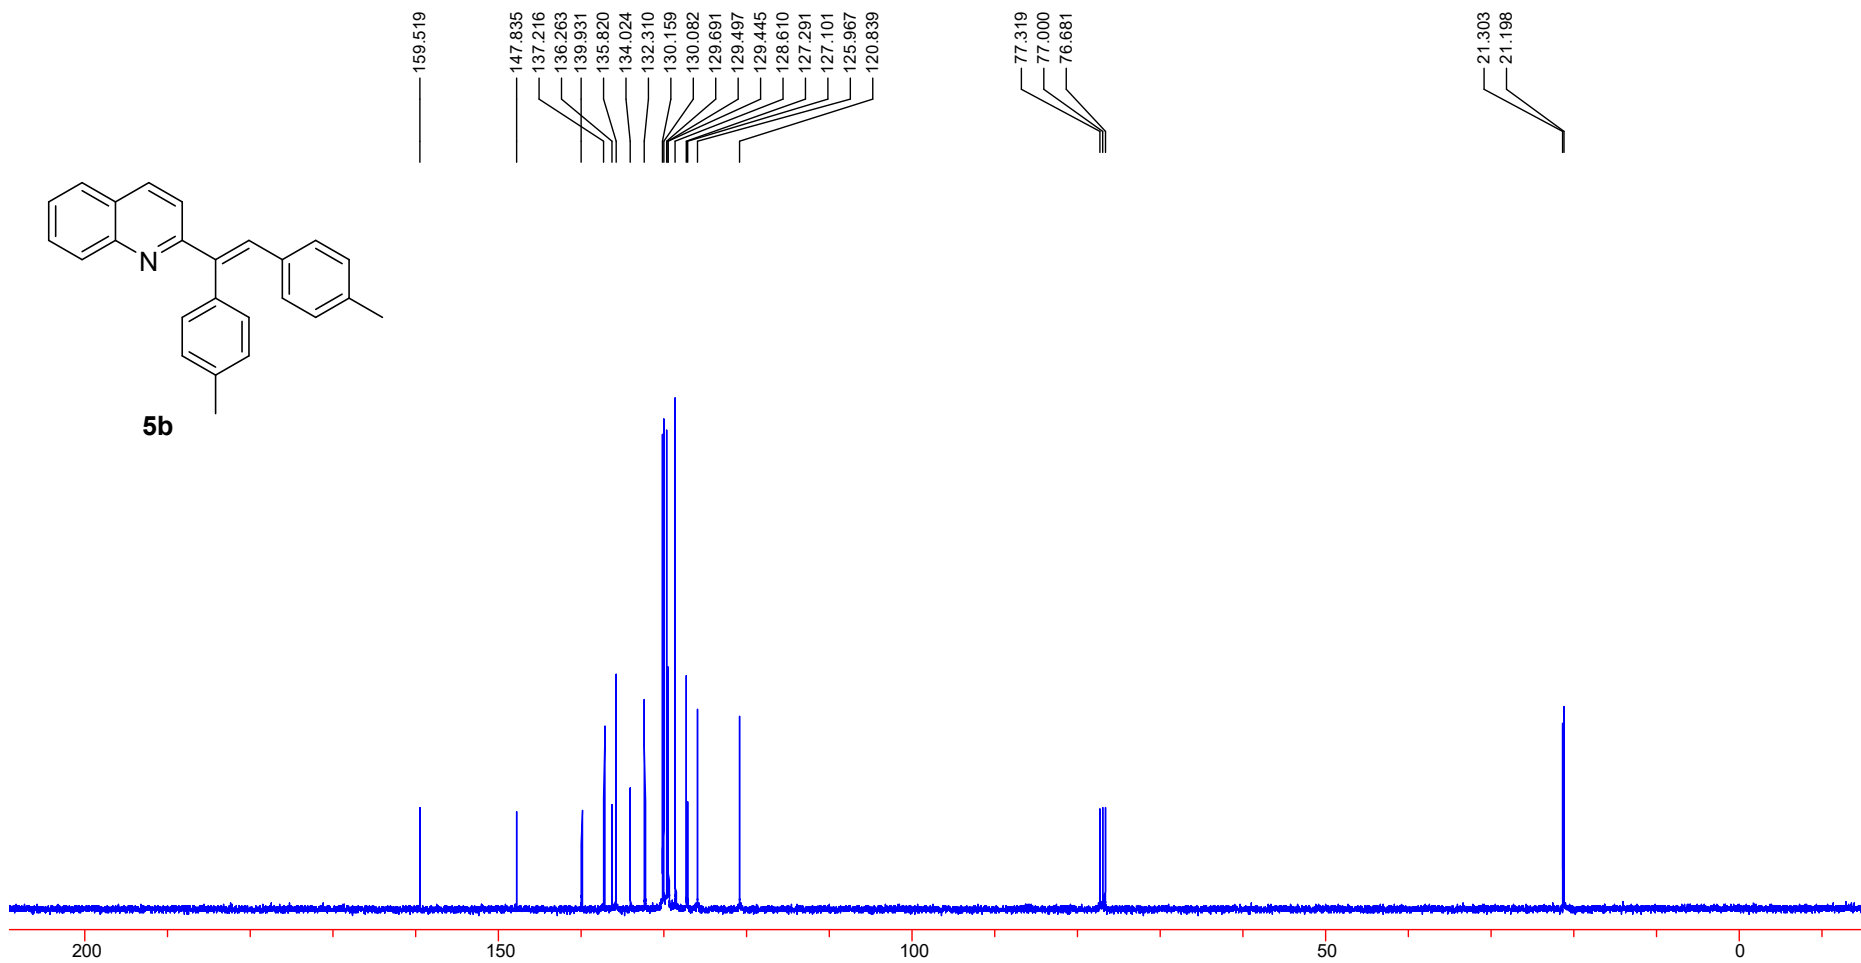

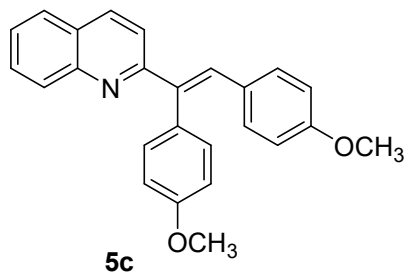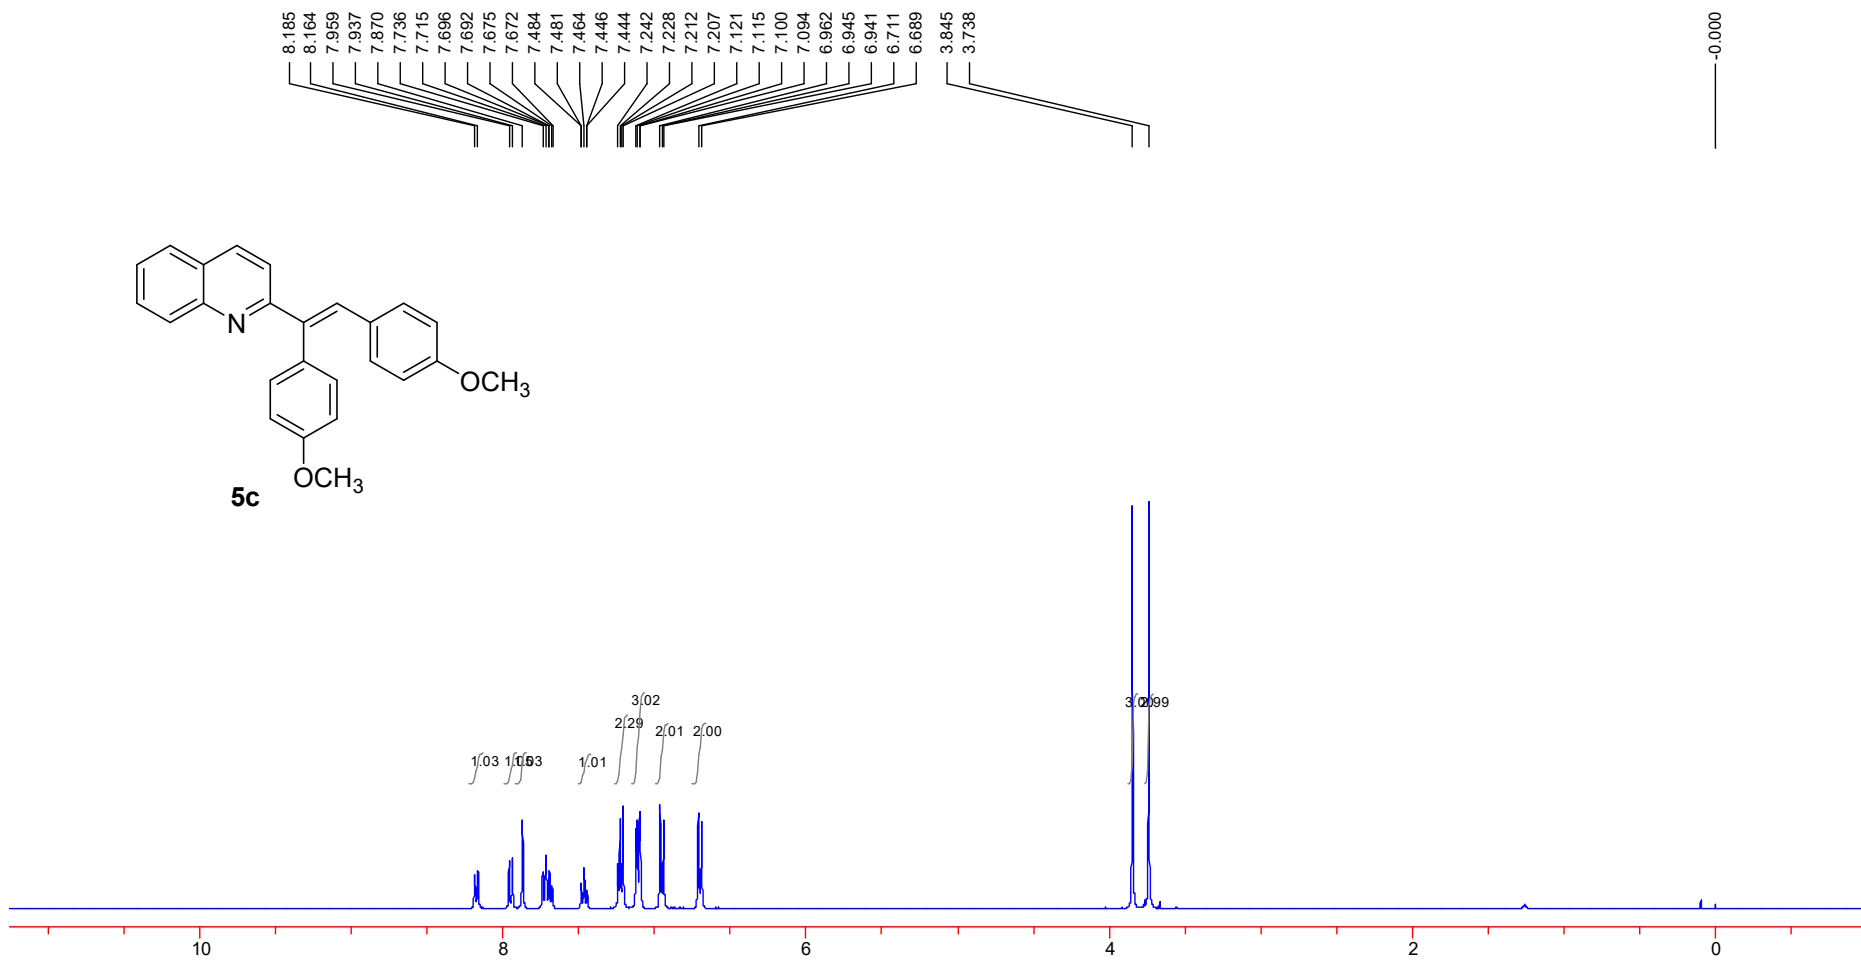

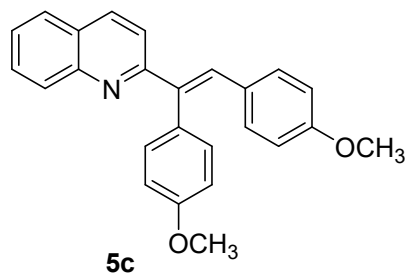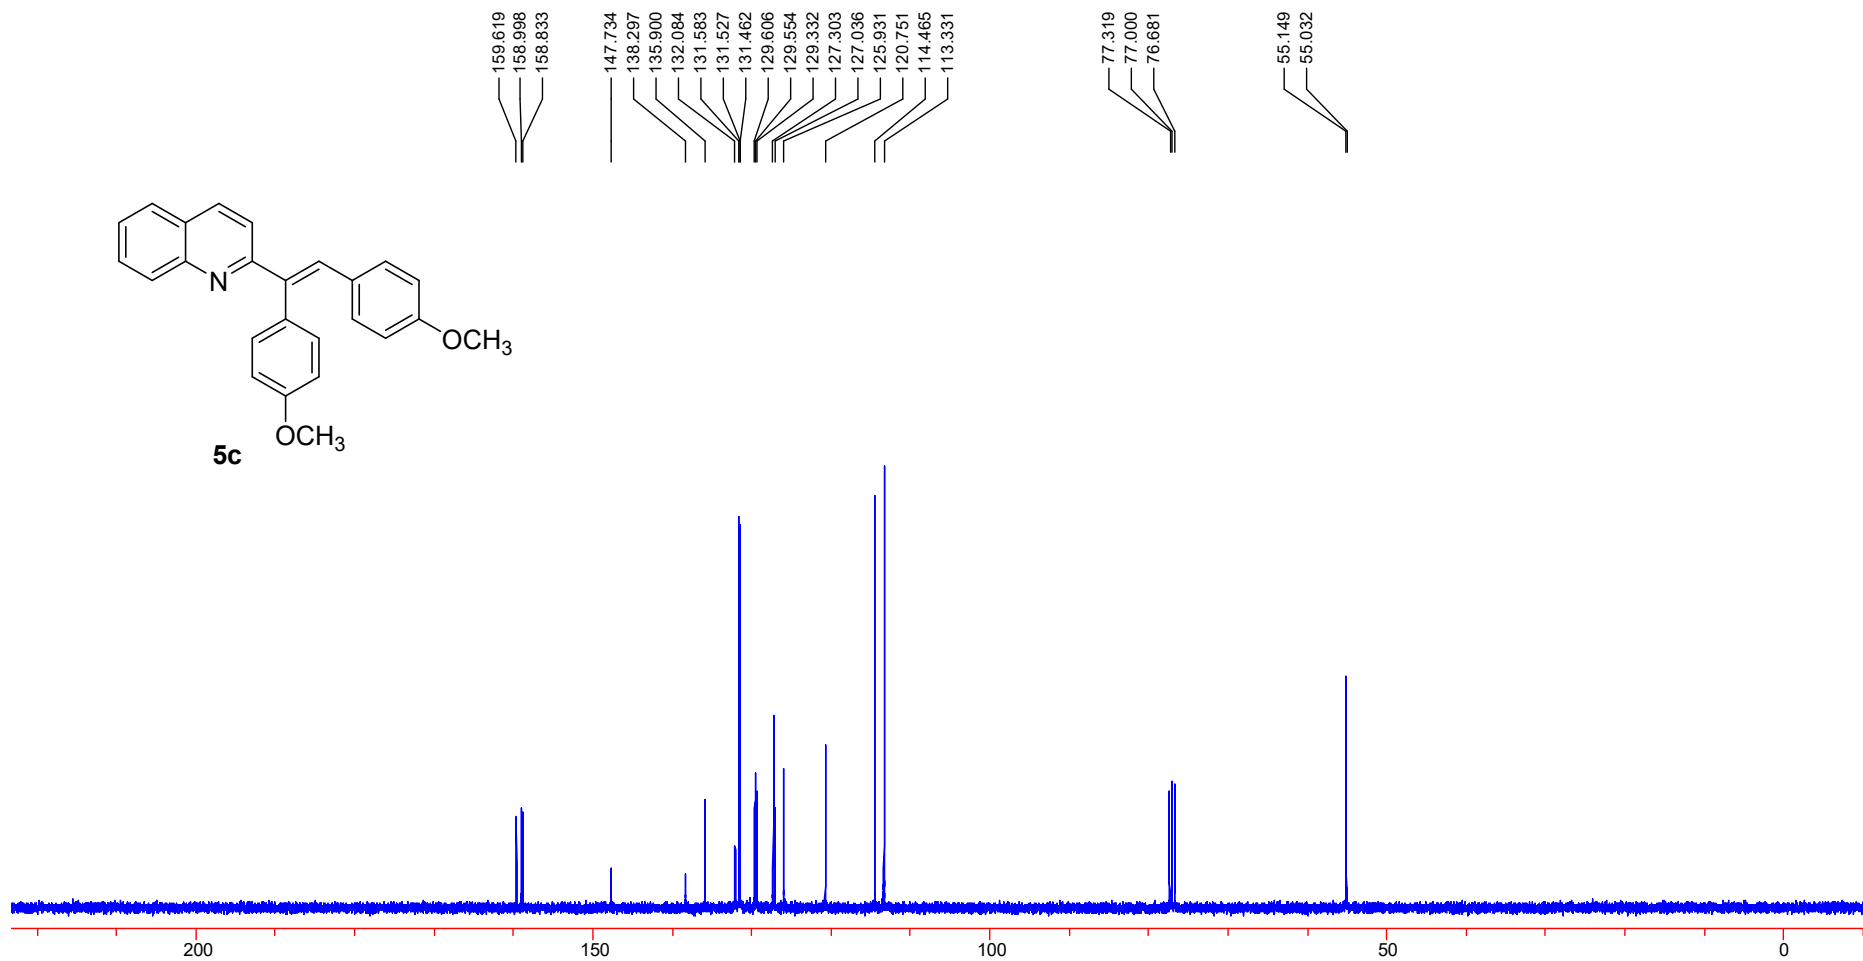

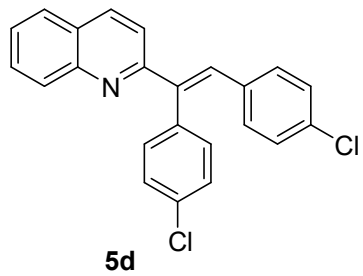

8.156  
8.134  
8.032  
8.011  
7.860  
7.790  
7.770  
7.735  
7.732  
7.541  
7.523  
7.402  
7.398  
7.381  
7.257  
7.229  
7.224  
7.208  
7.167  
7.145  
7.106  
7.084  
7.065  
7.043

-0.000

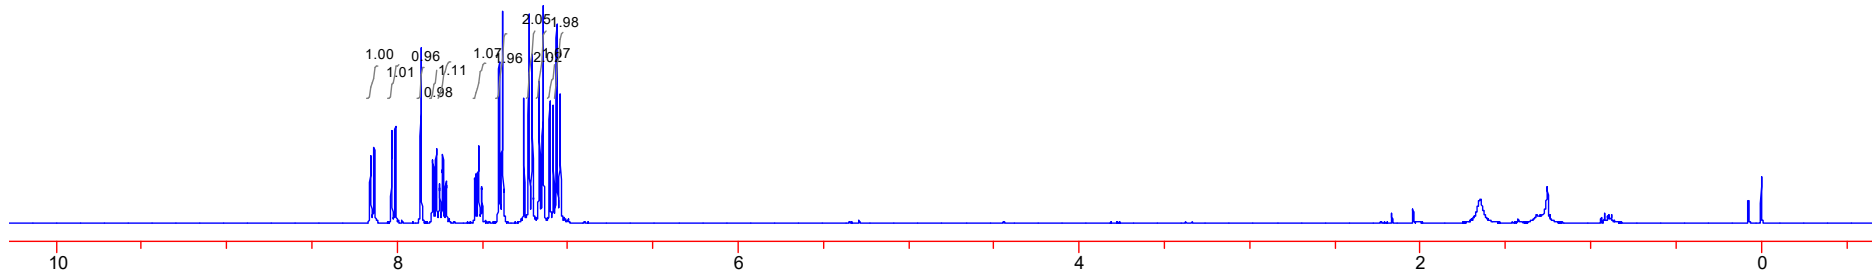

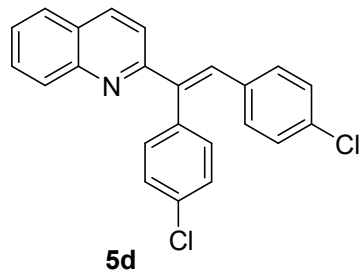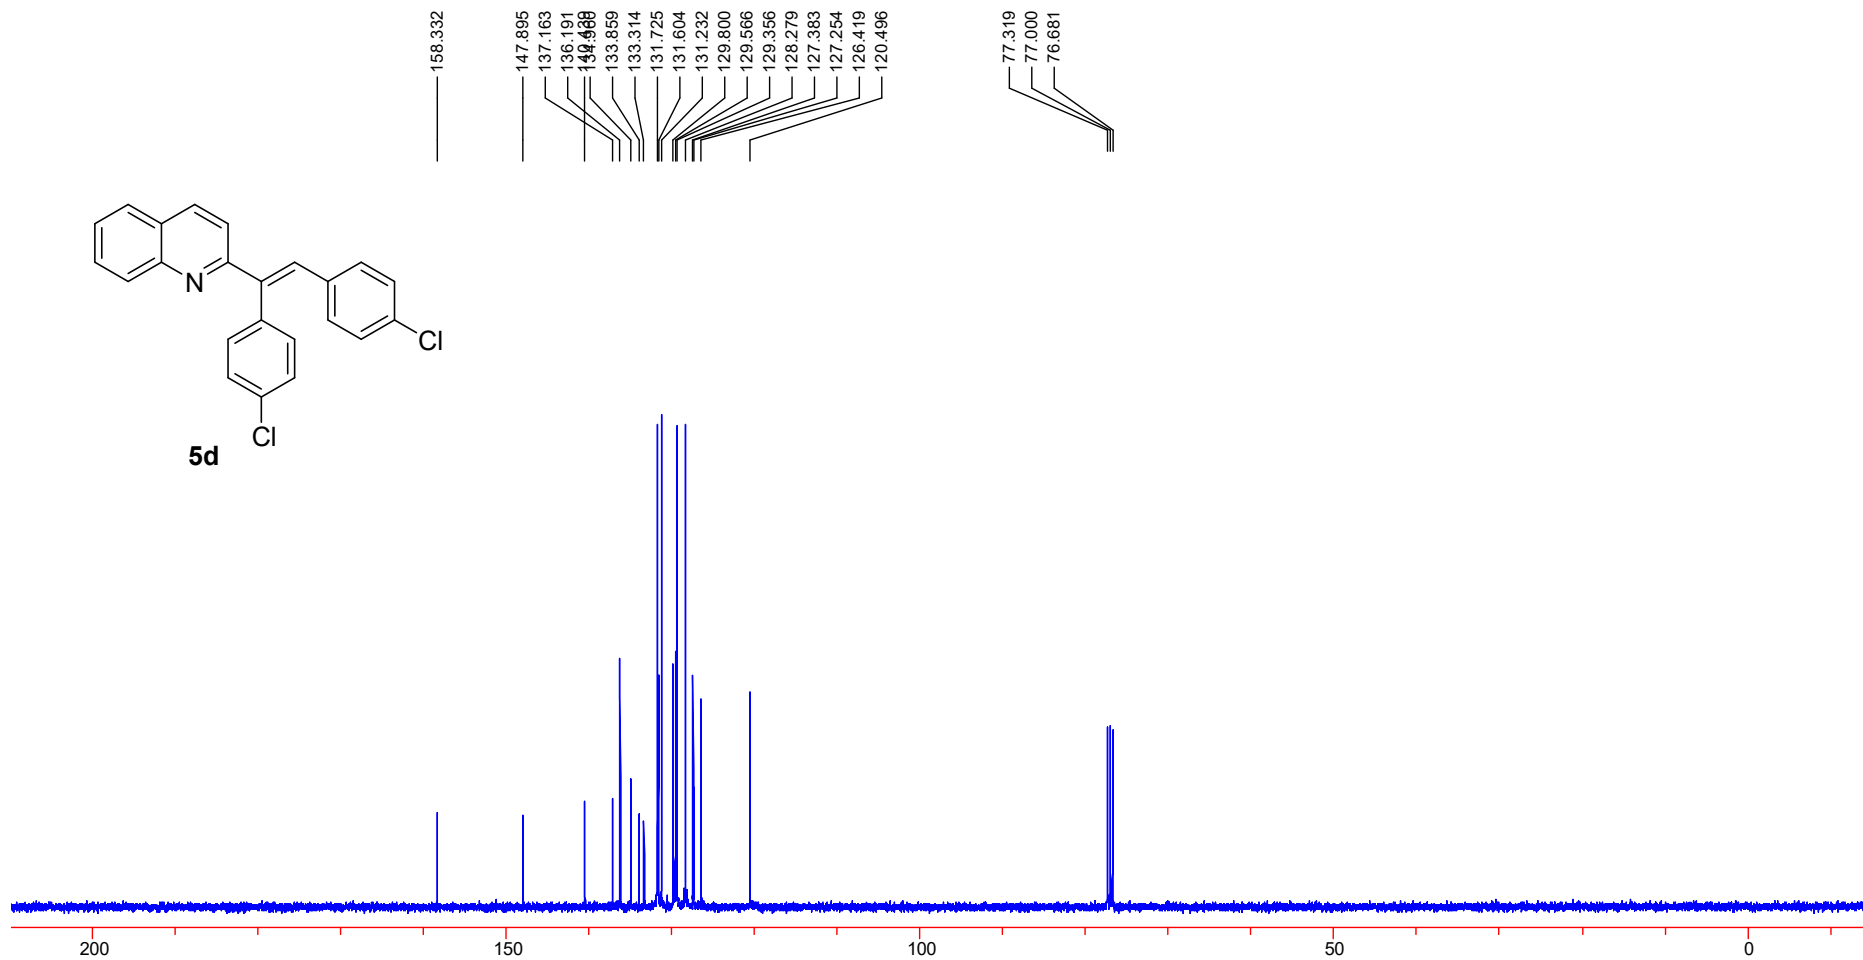

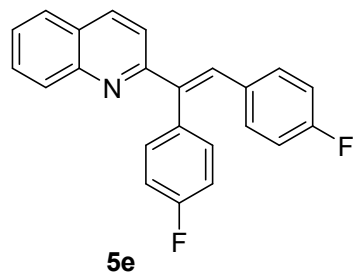

8.159  
8.138  
8.015  
7.994  
7.881  
7.776  
7.756  
7.741  
7.738  
7.721  
7.702  
7.700  
7.524  
7.506  
7.488  
7.487  
7.270  
7.265  
7.255  
7.249  
7.239  
7.234  
7.130  
7.108  
7.092  
7.085  
7.072  
6.884  
6.862  
6.840

-0.000

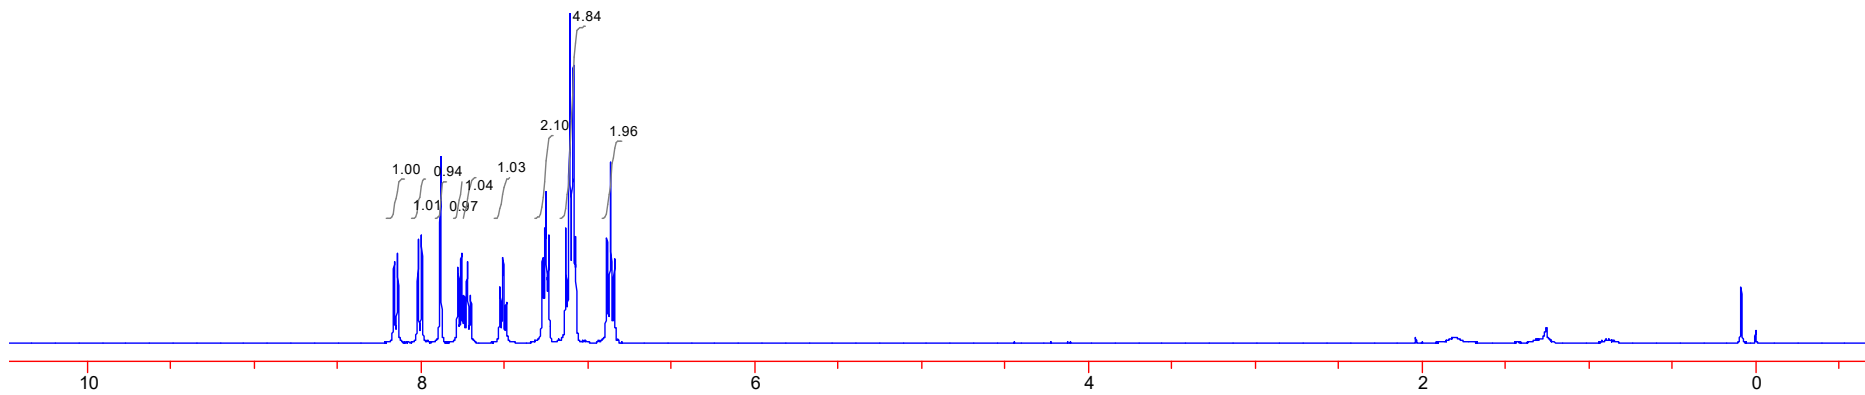

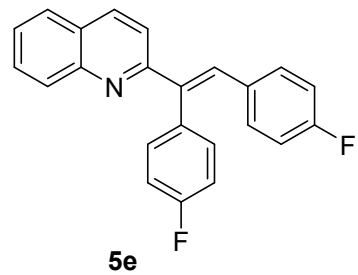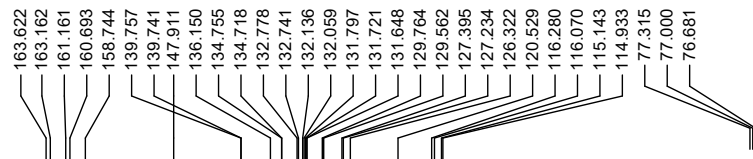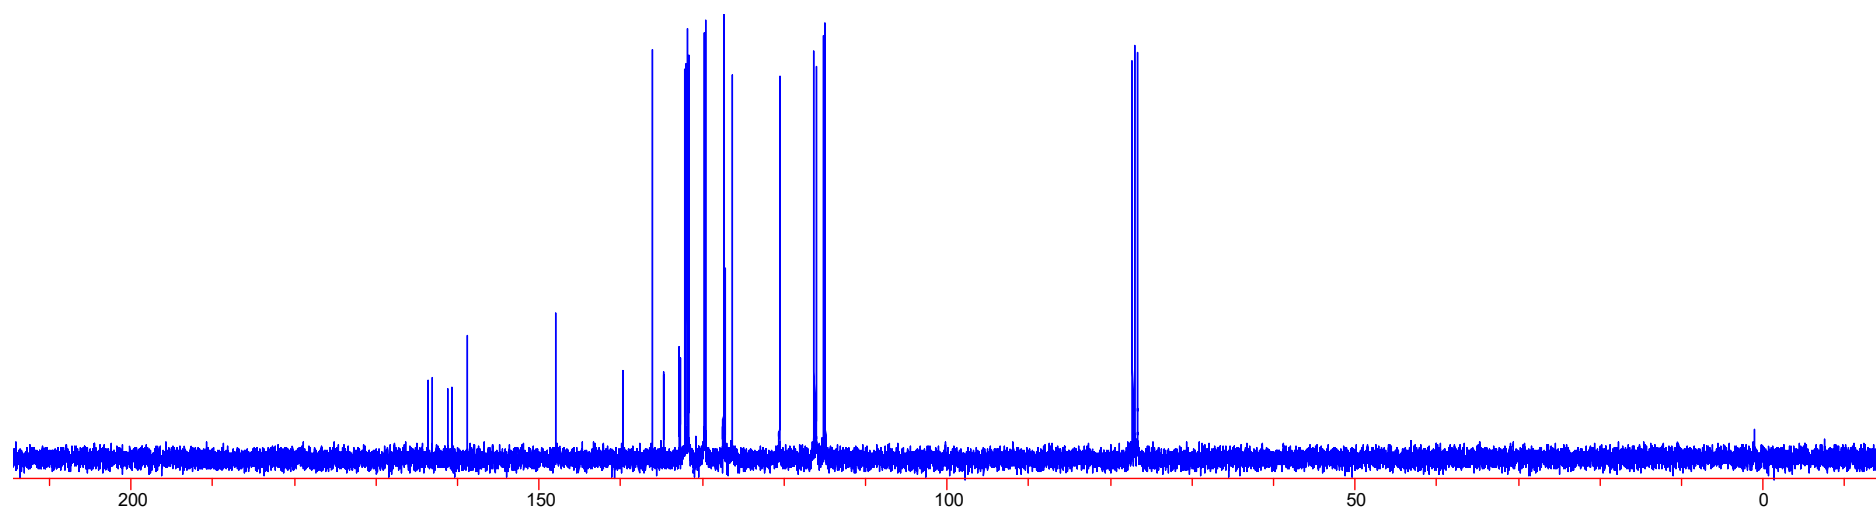



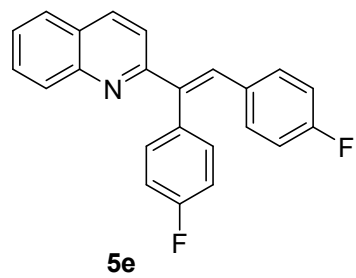

113.282  
113.290  
113.297  
113.305  
113.314  
113.320  
113.328  
113.732  
113.740  
113.747  
113.755  
113.764  
113.770  
113.779

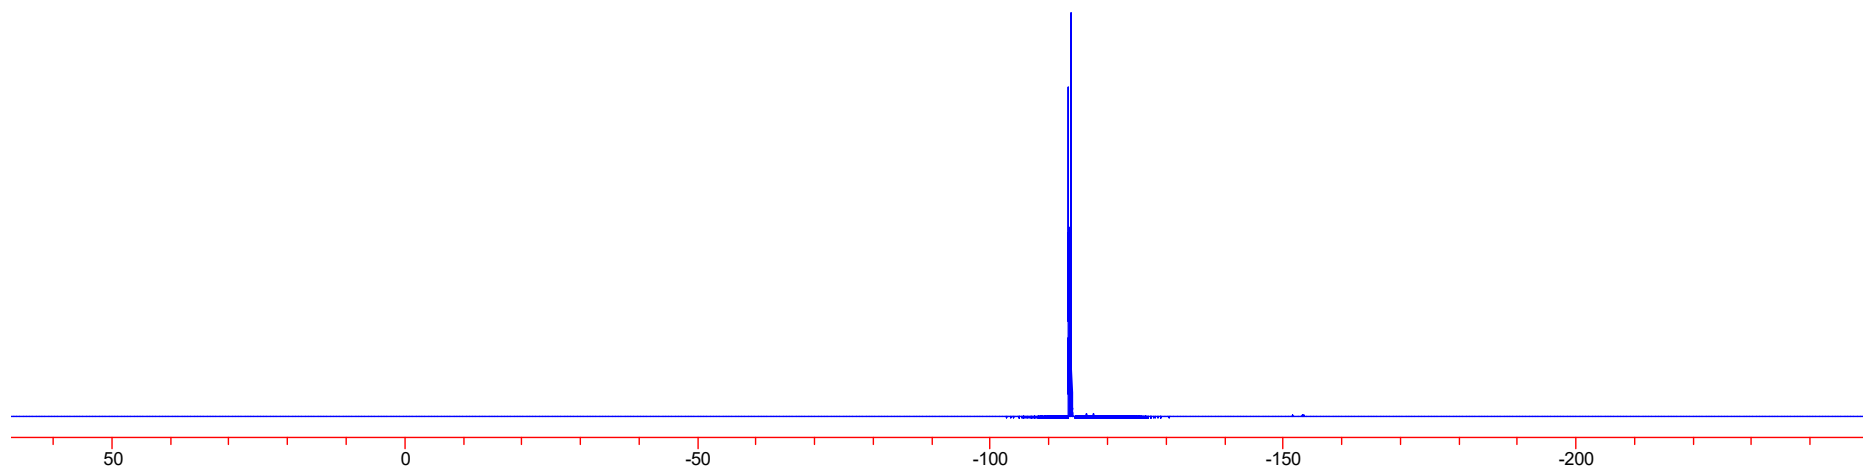

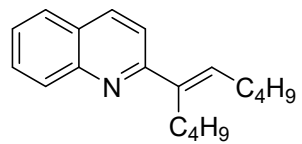

**5f**

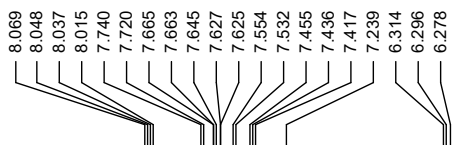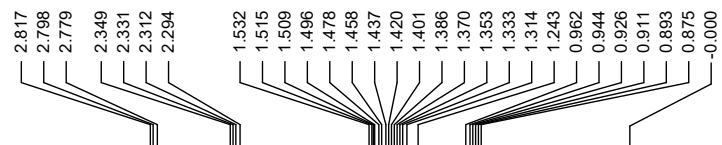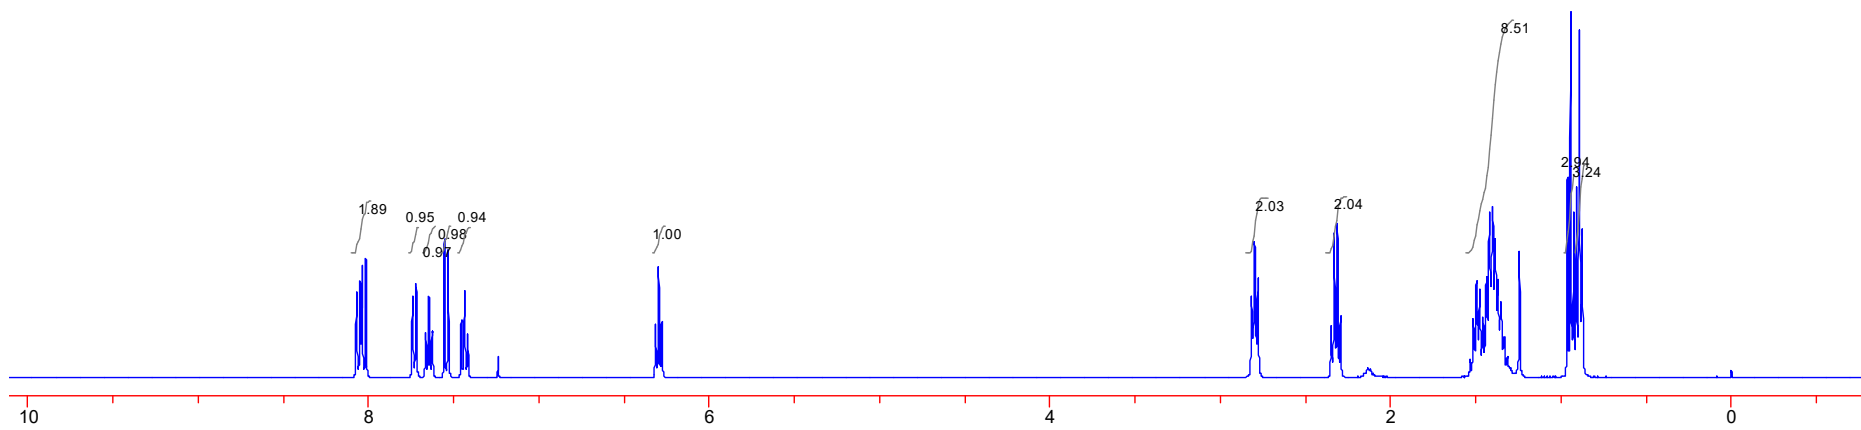

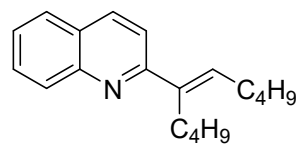

5f

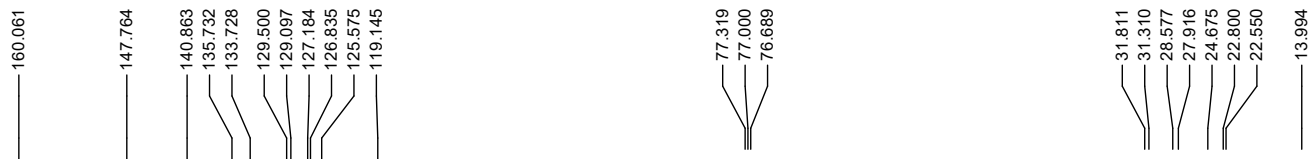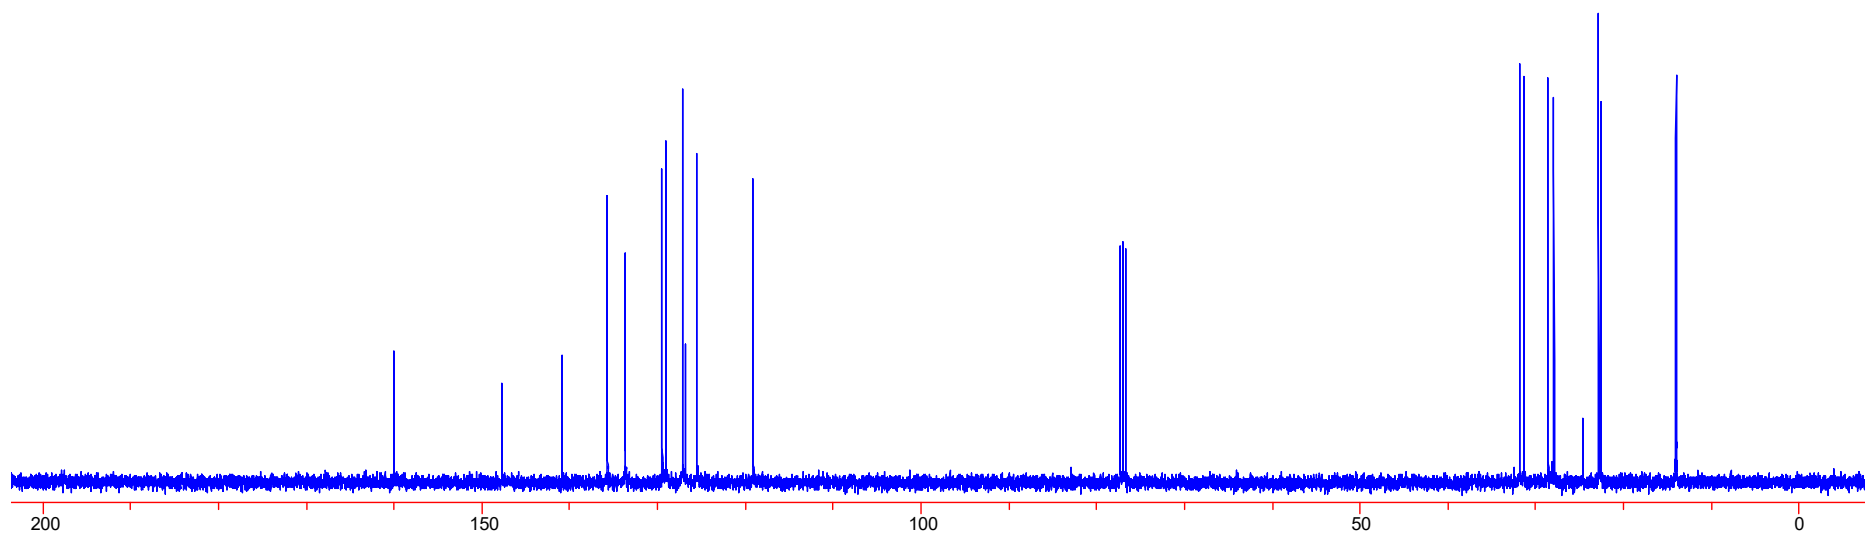

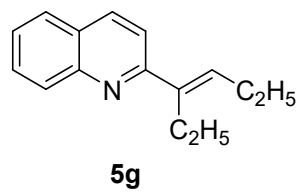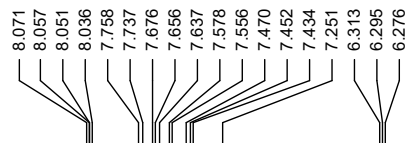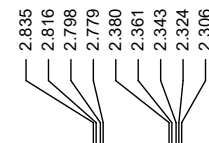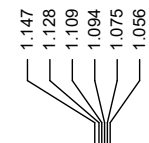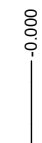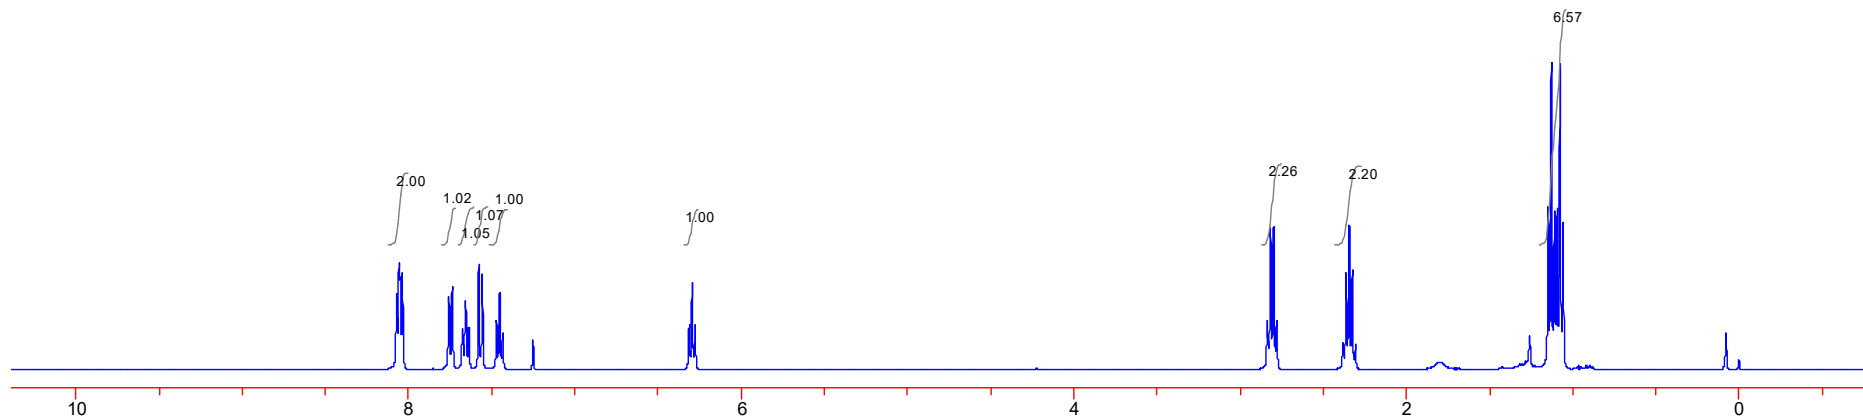

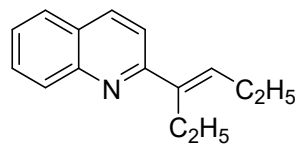

5g

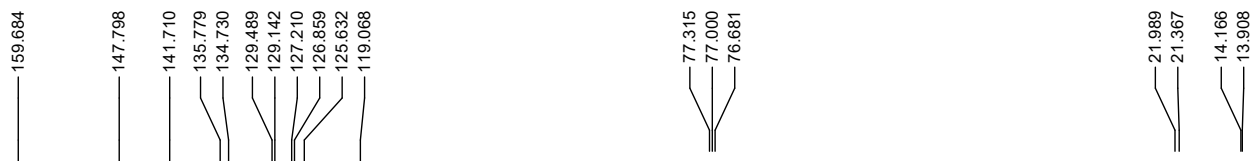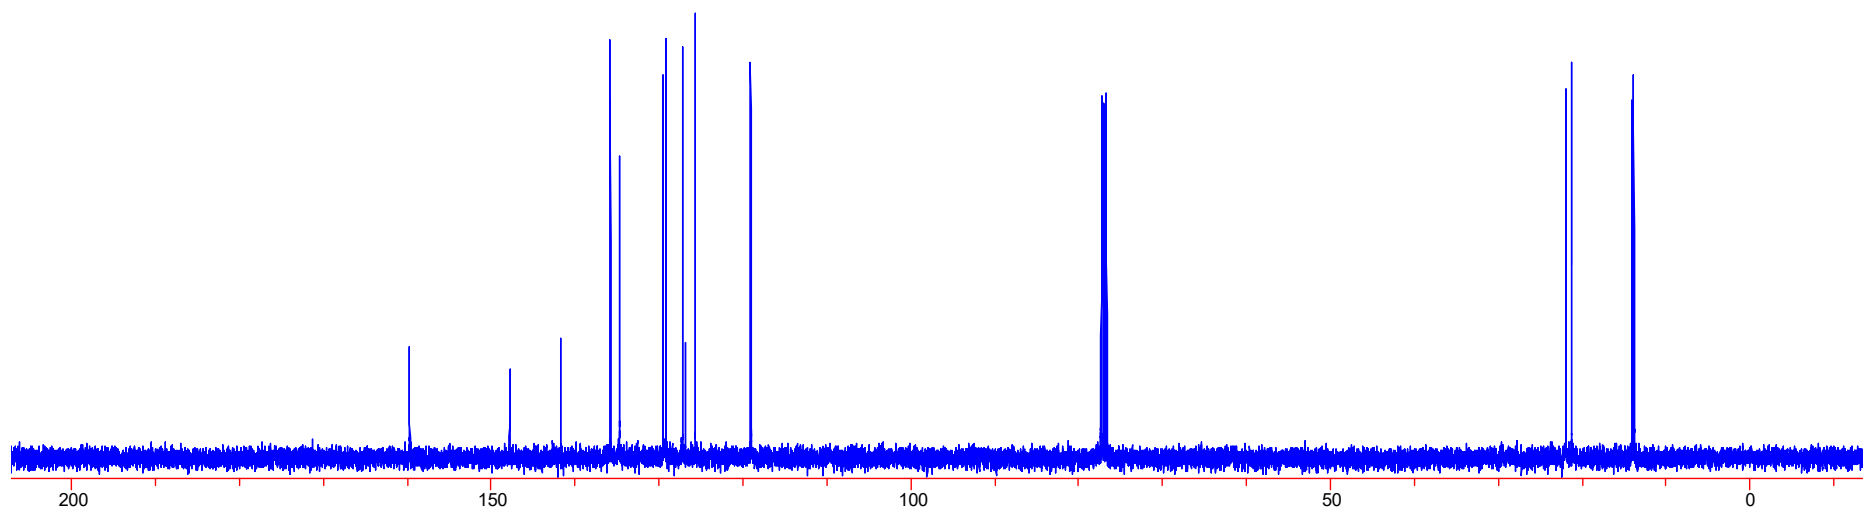

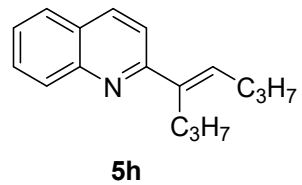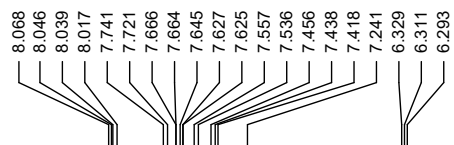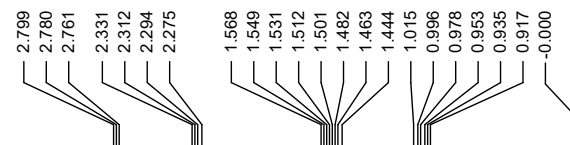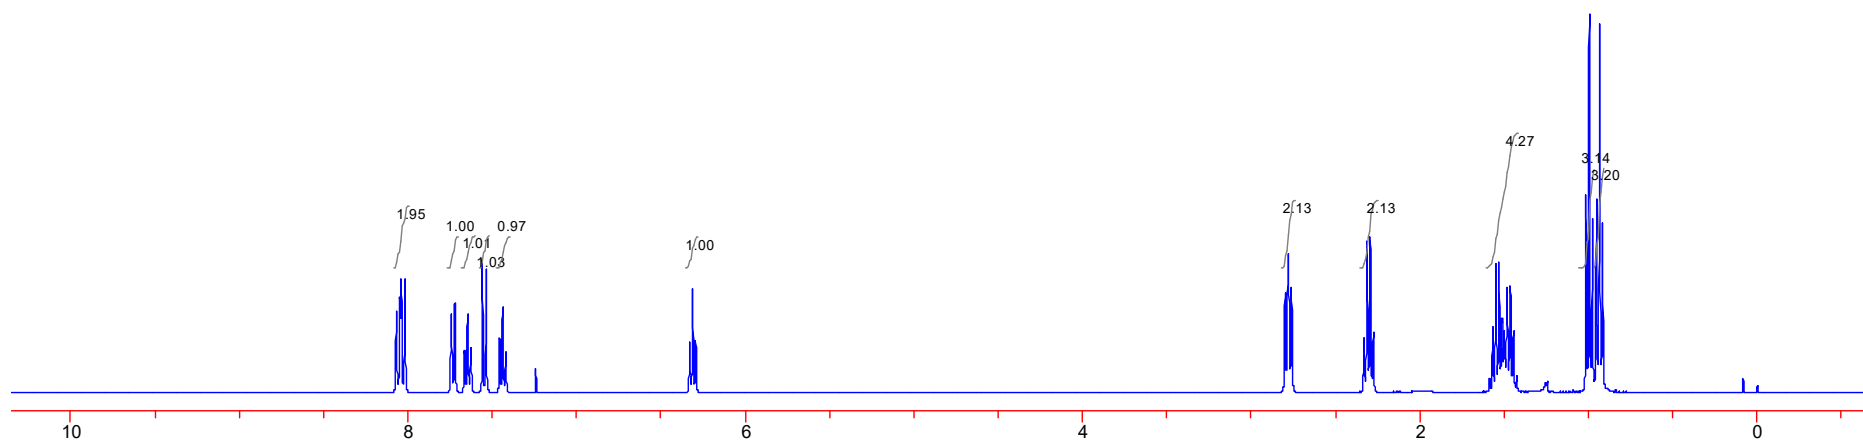

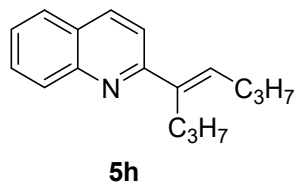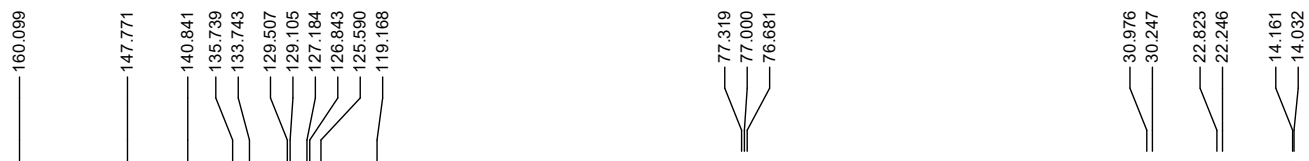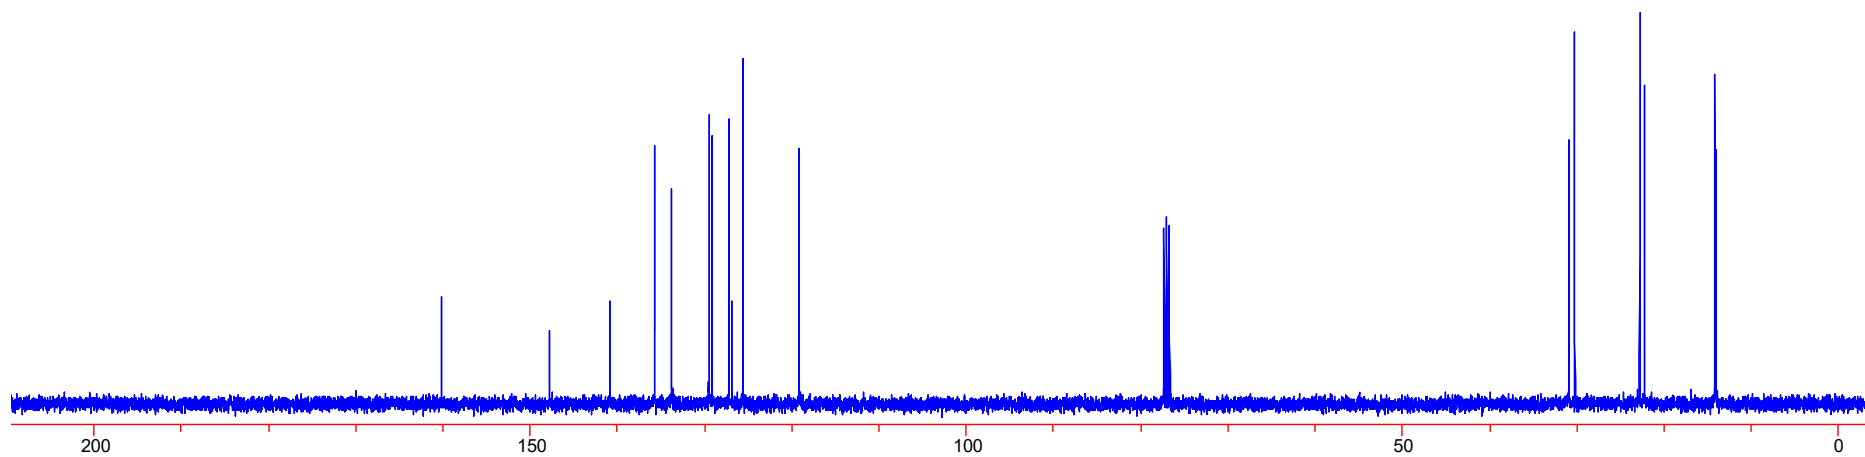

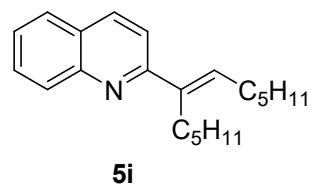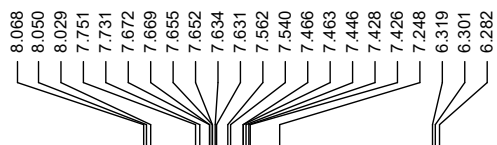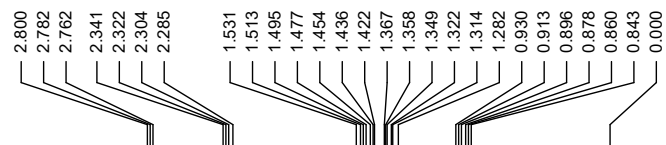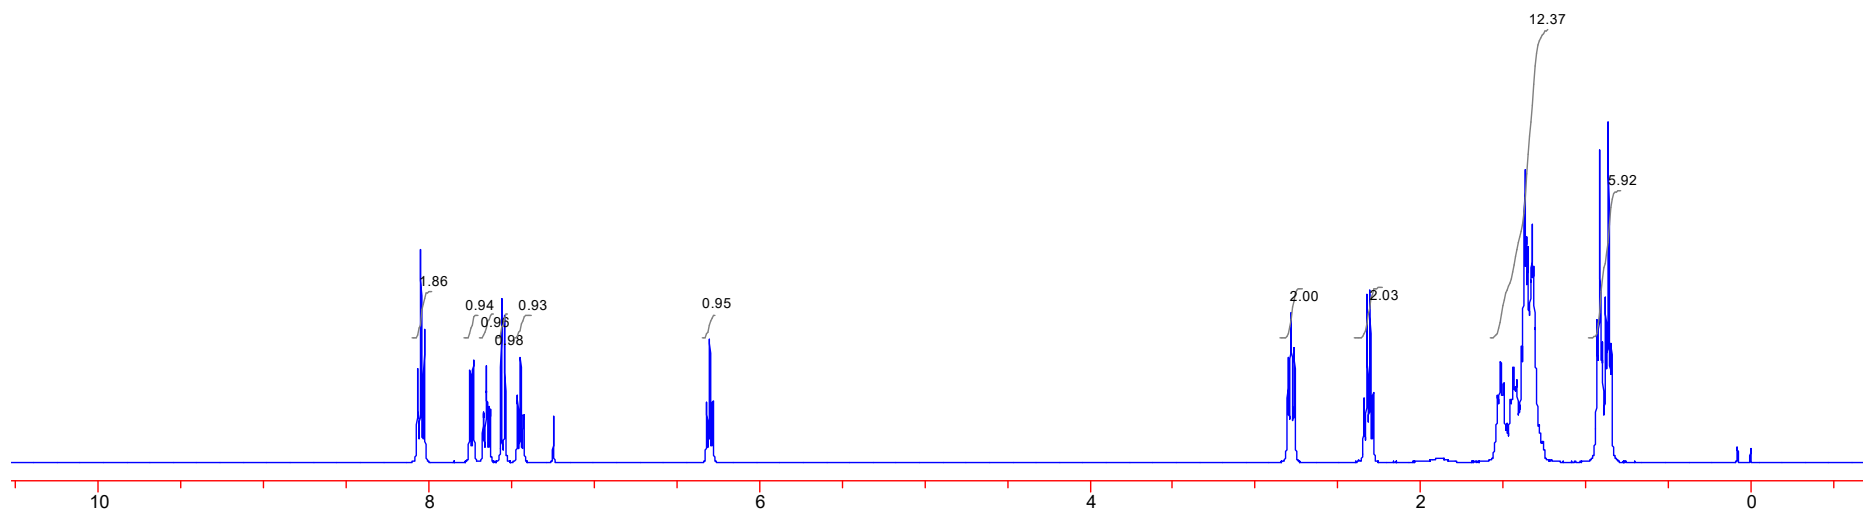



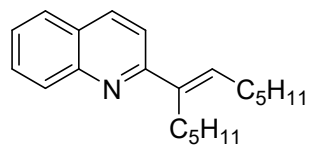

5i

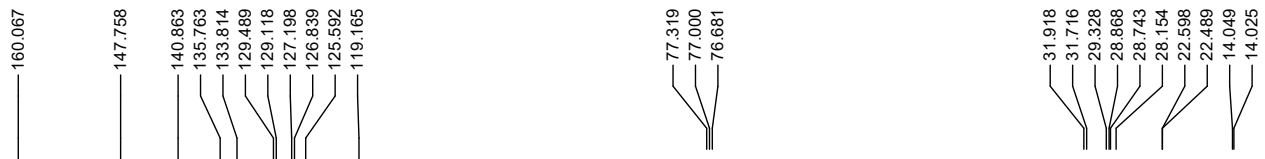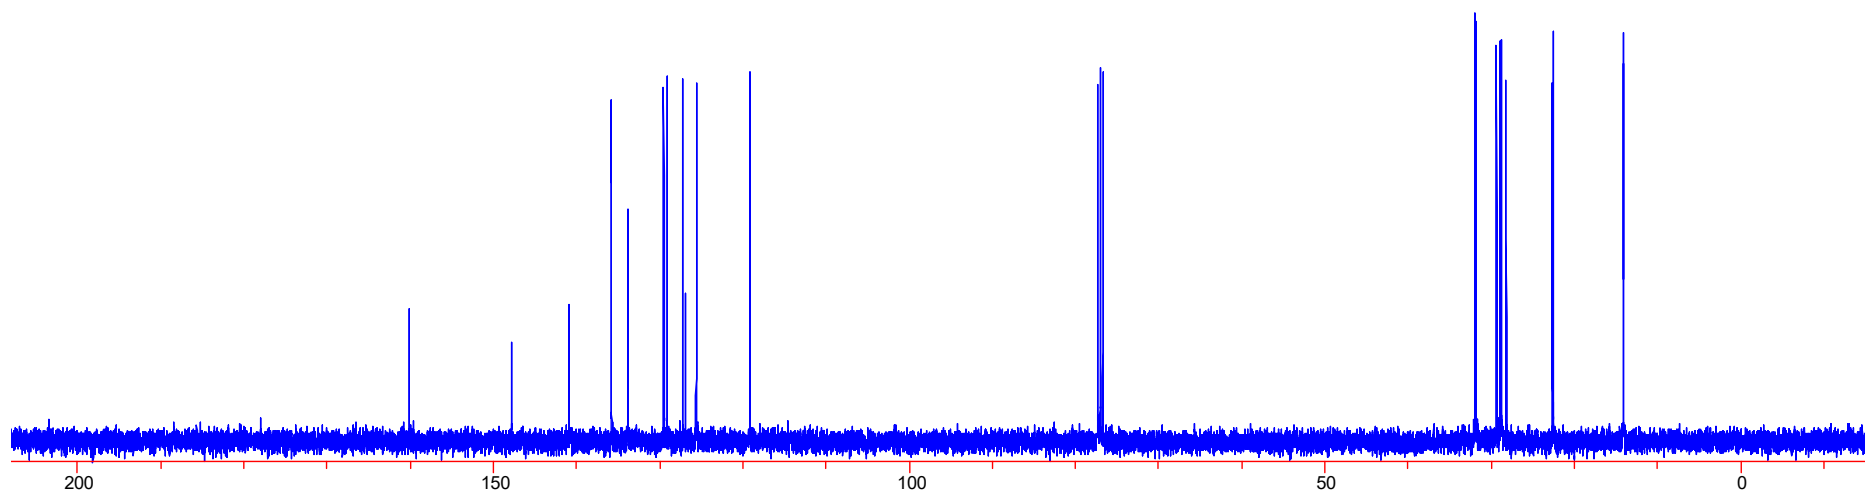

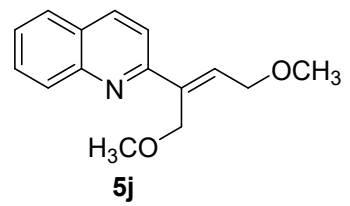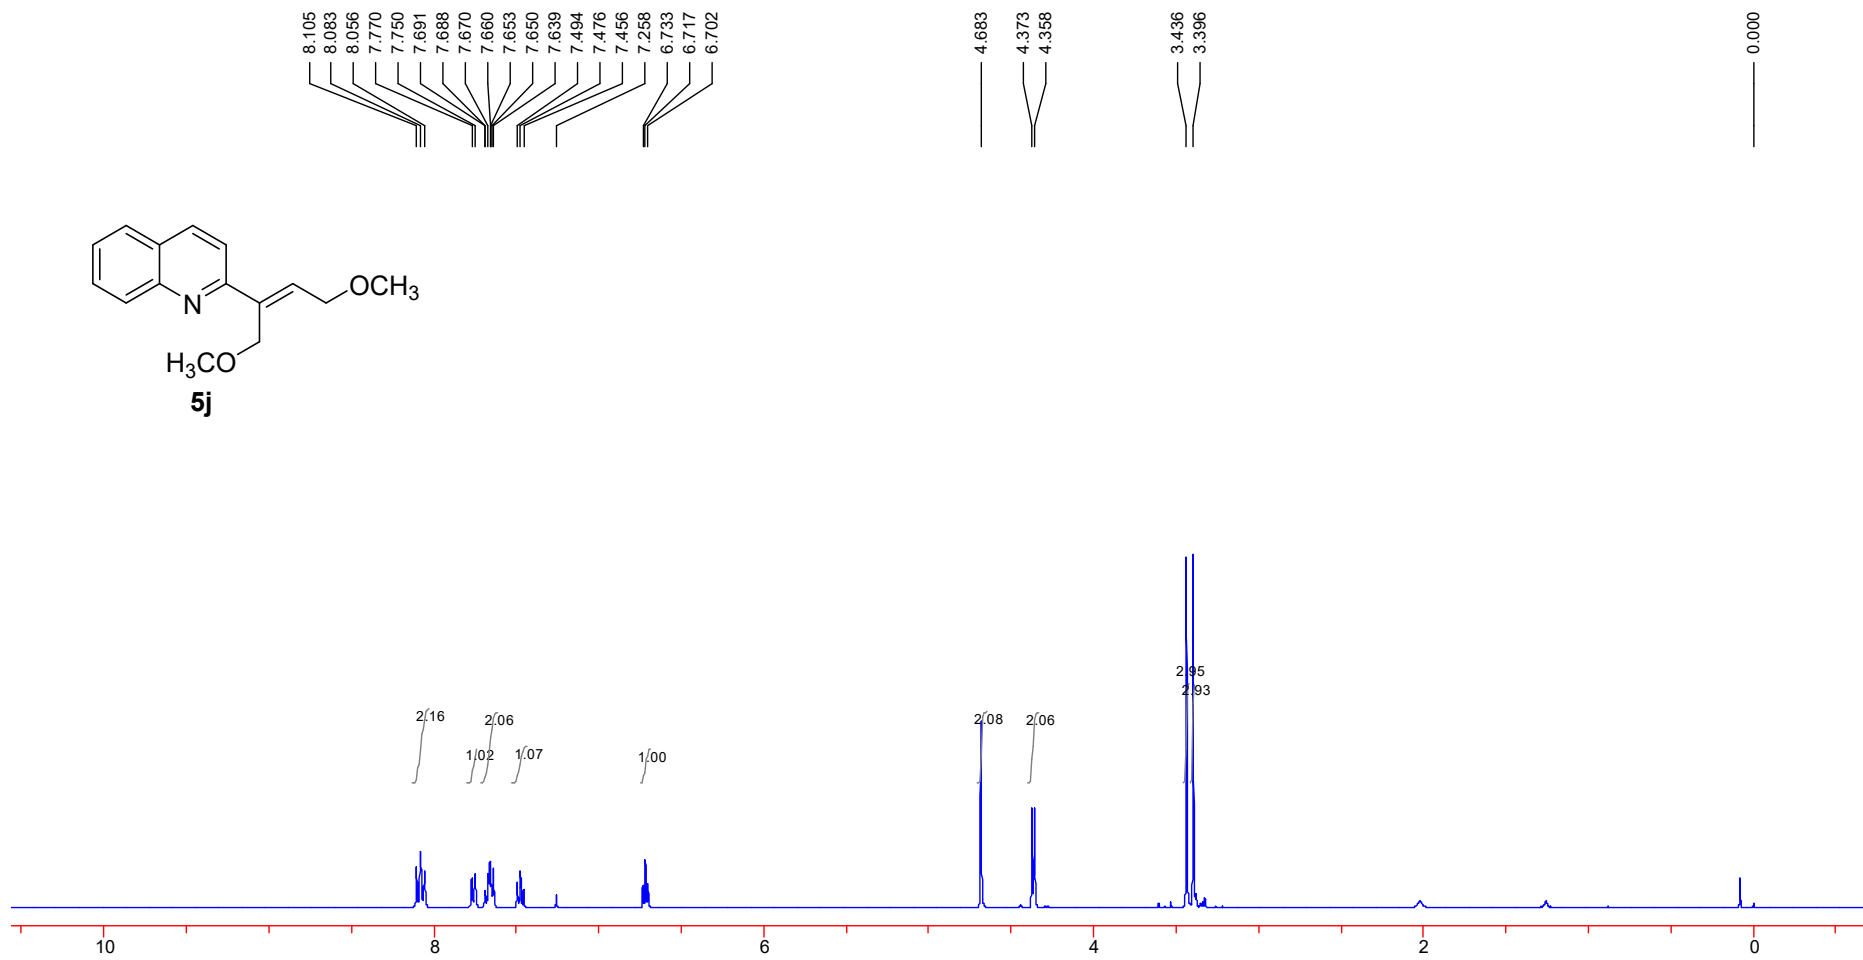

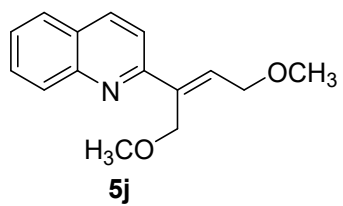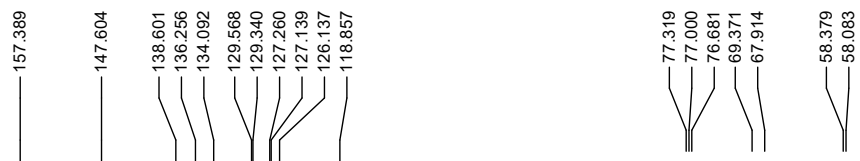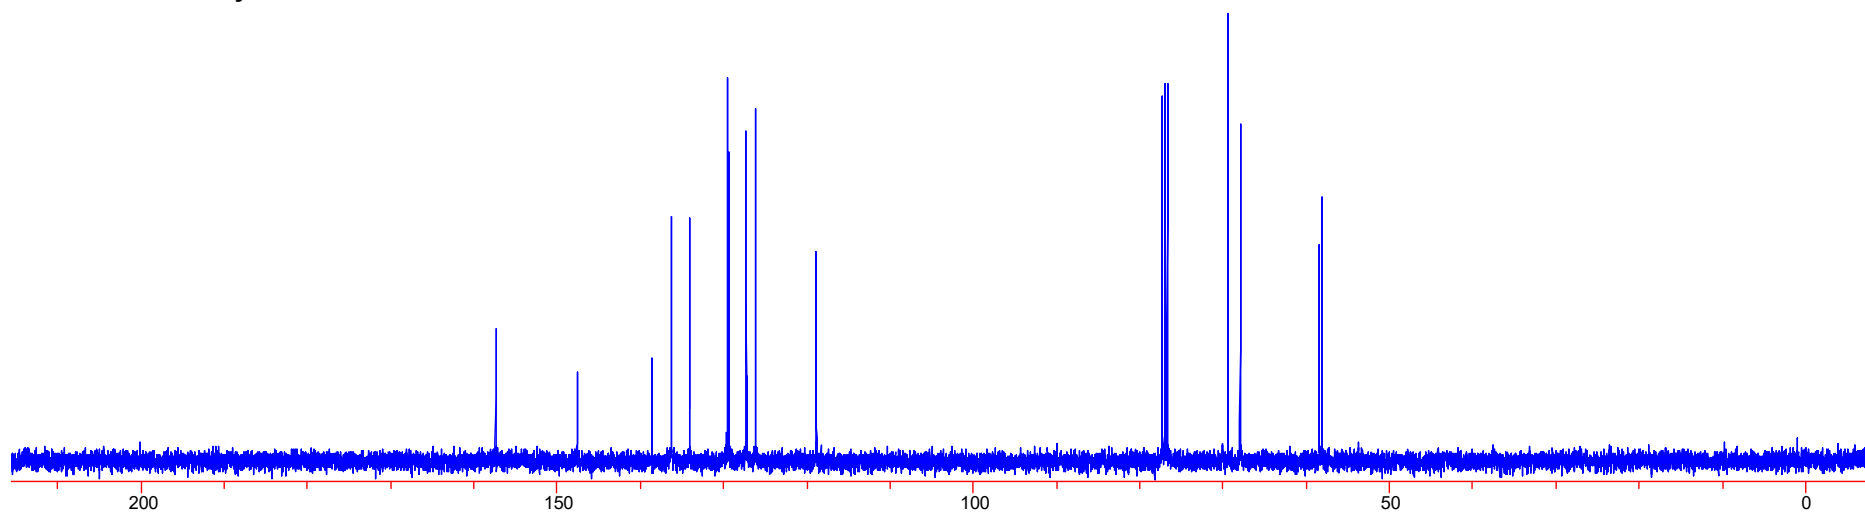

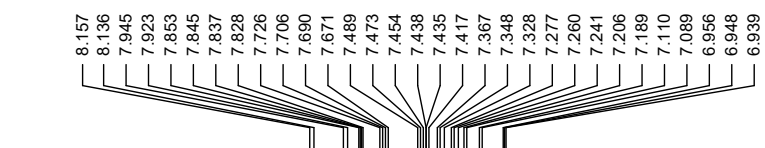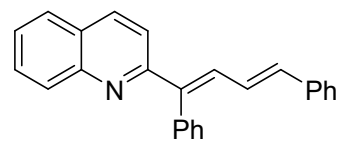

**5k**

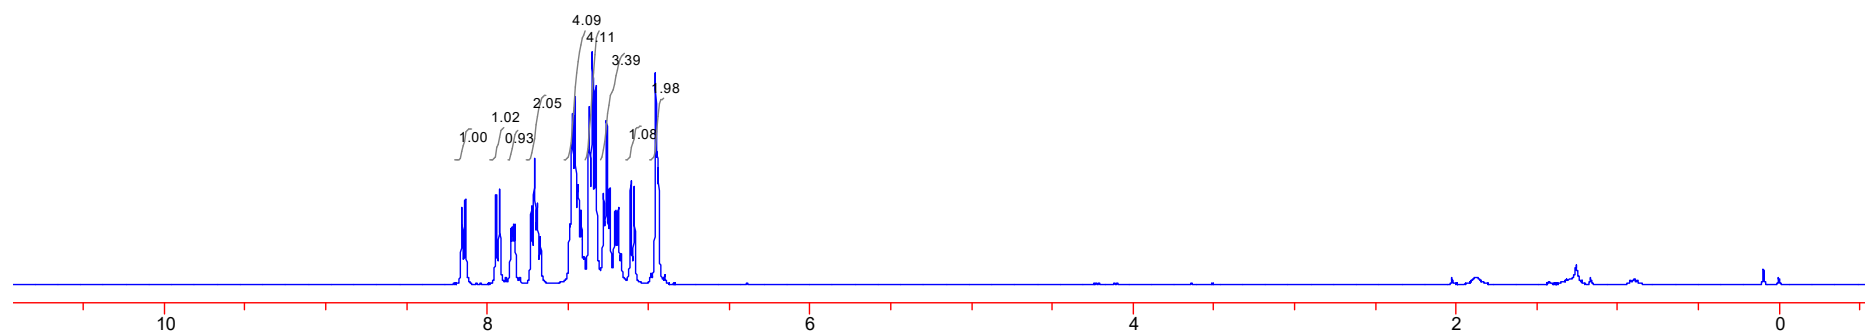

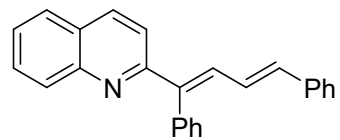

5k

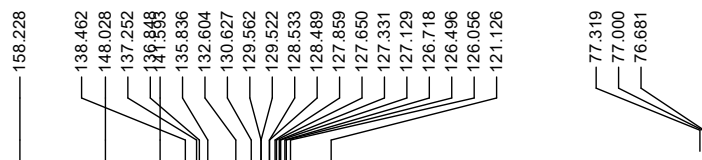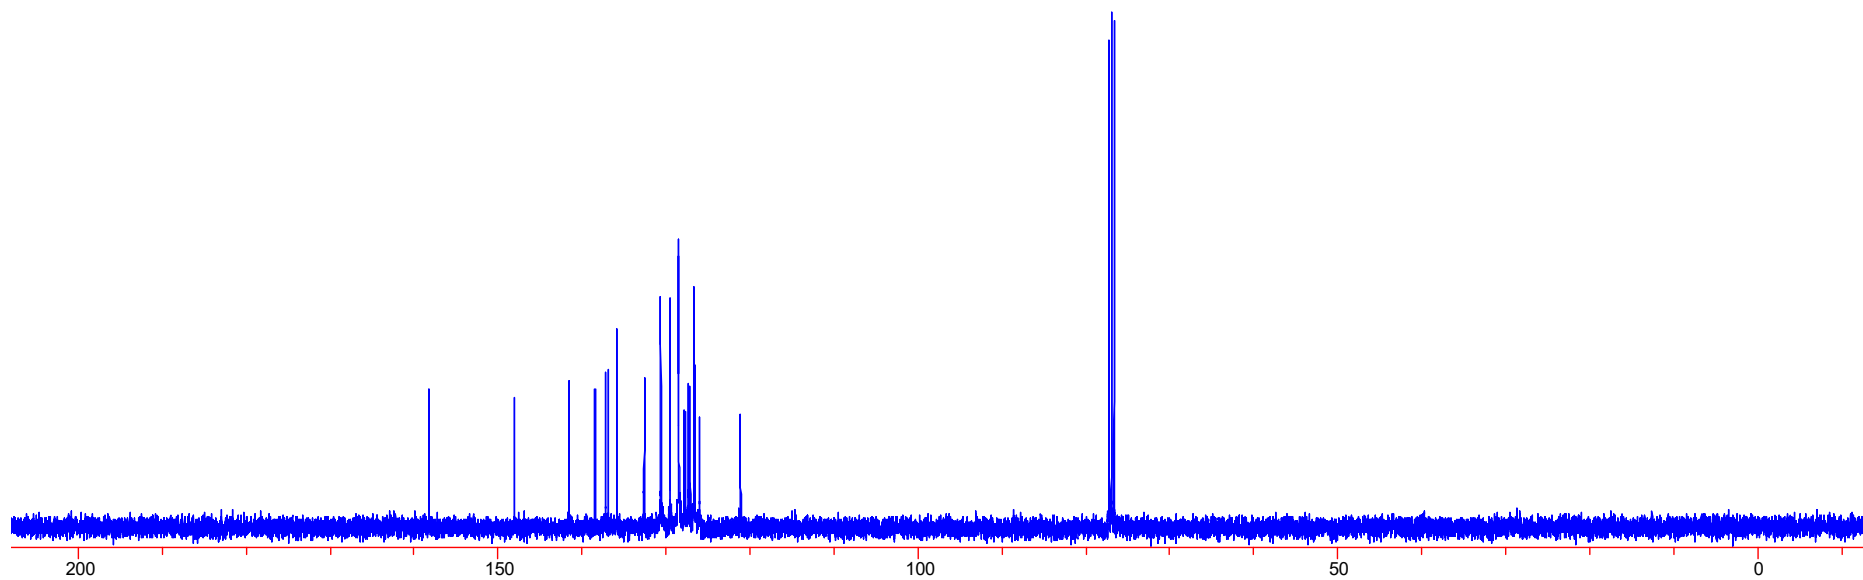

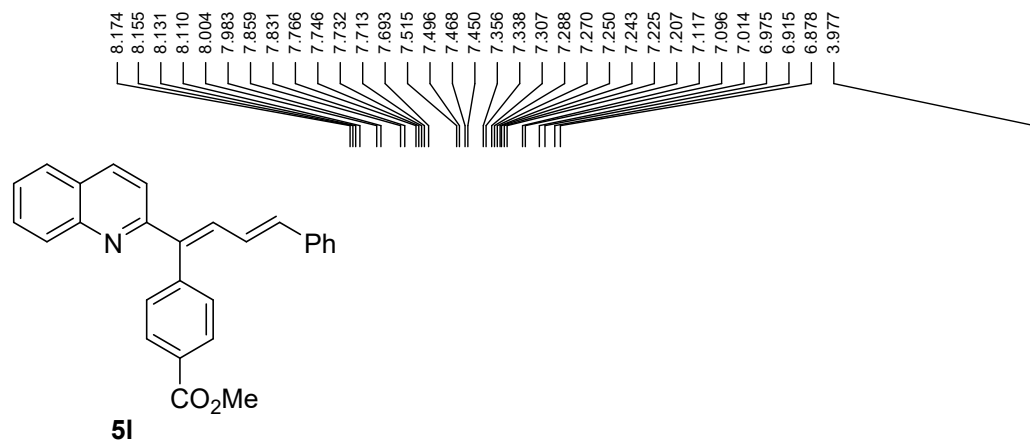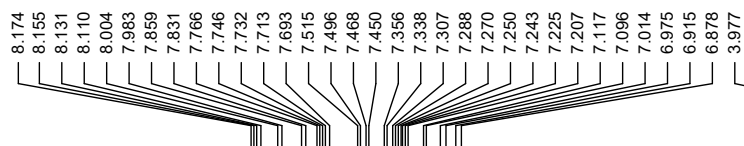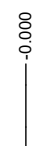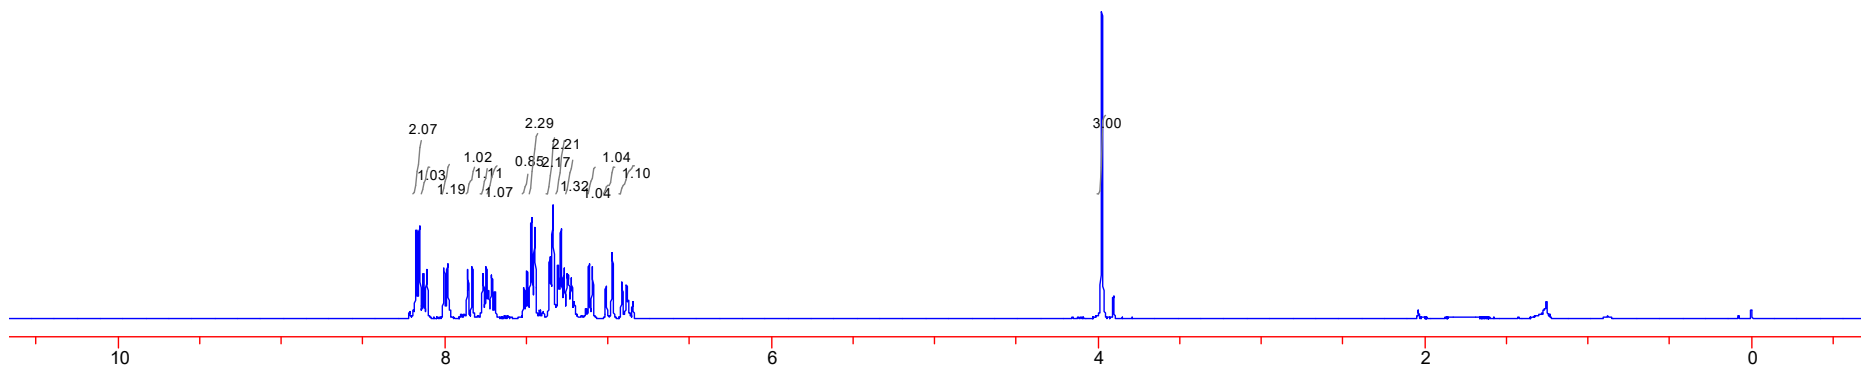

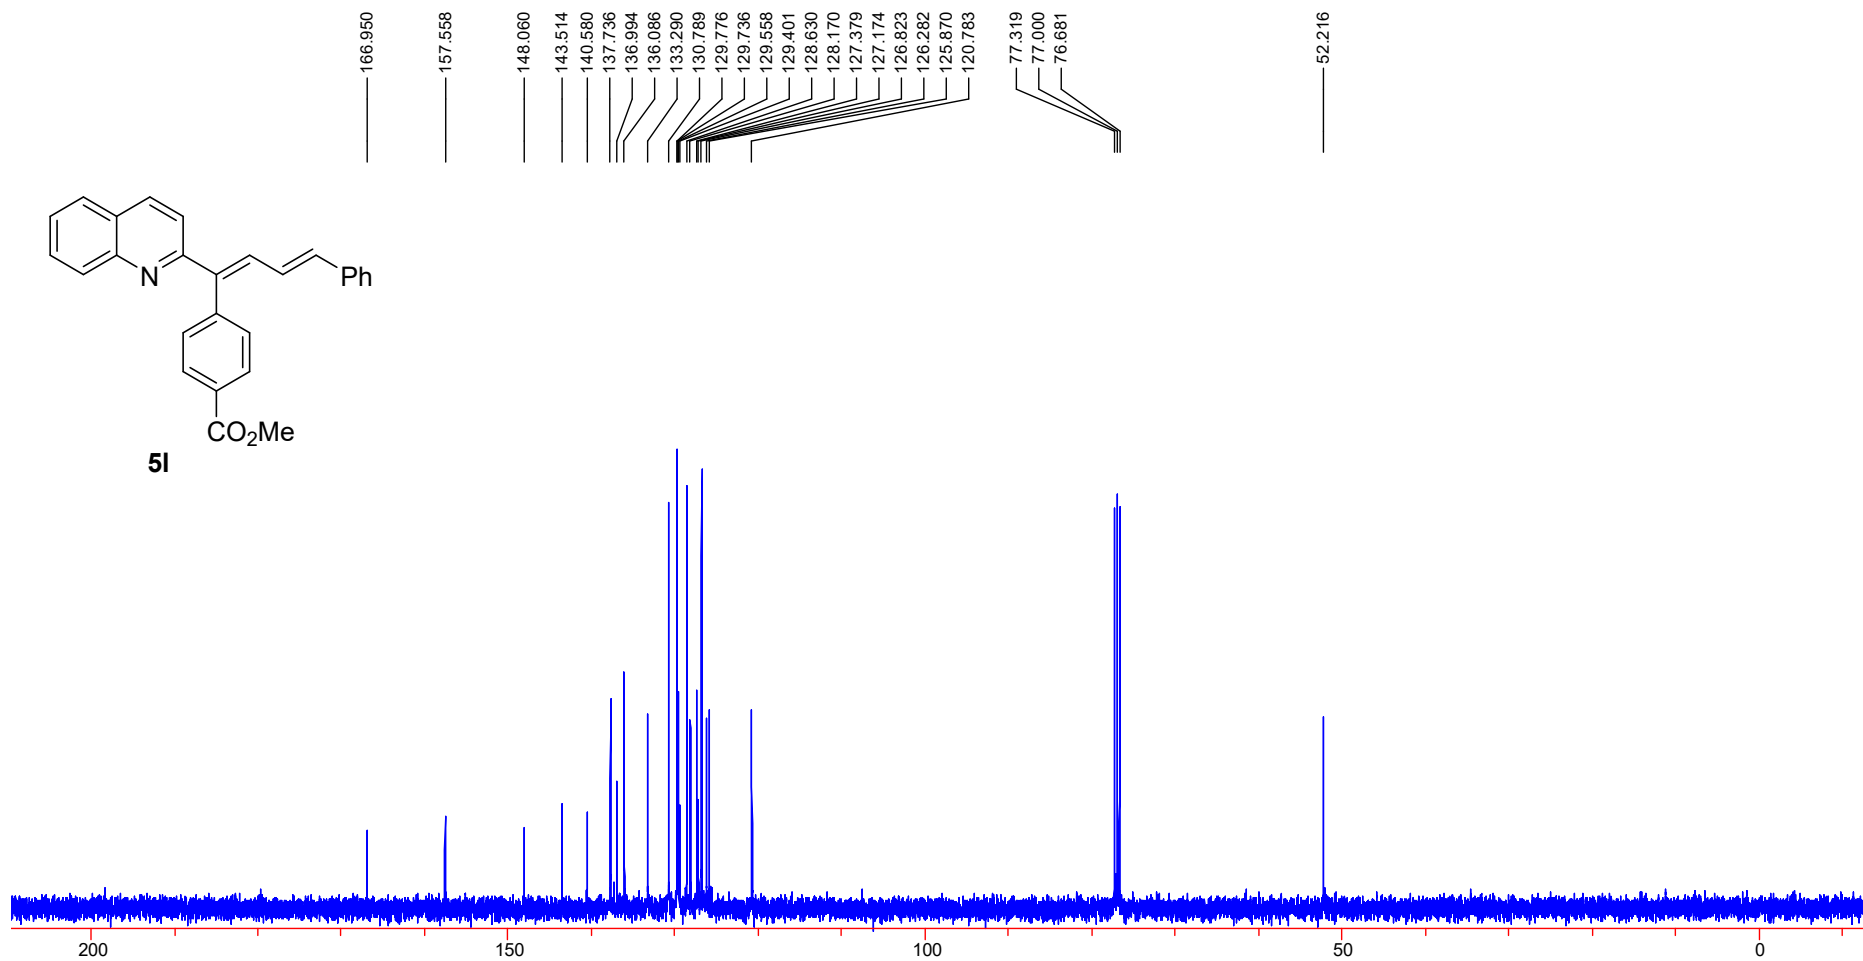

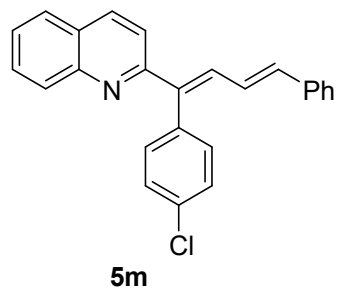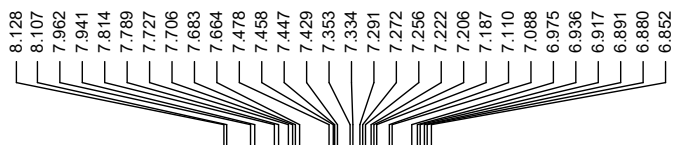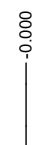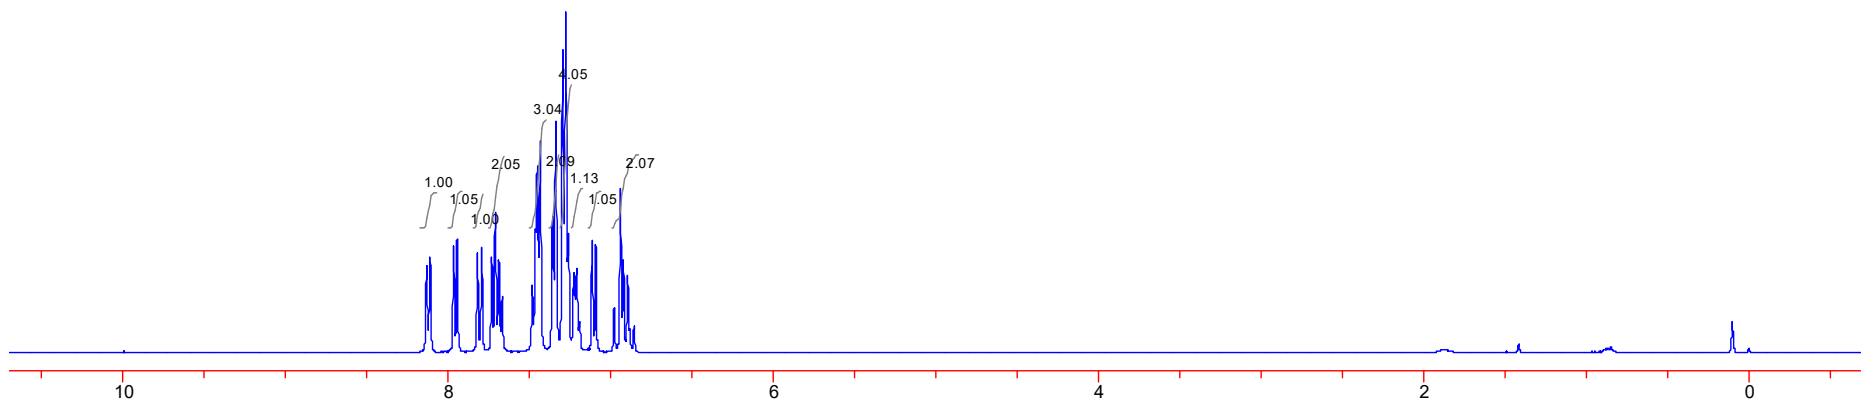



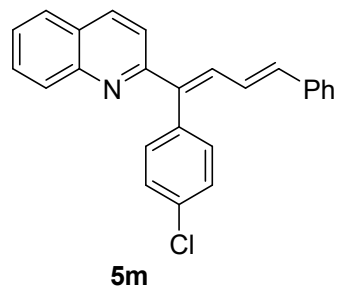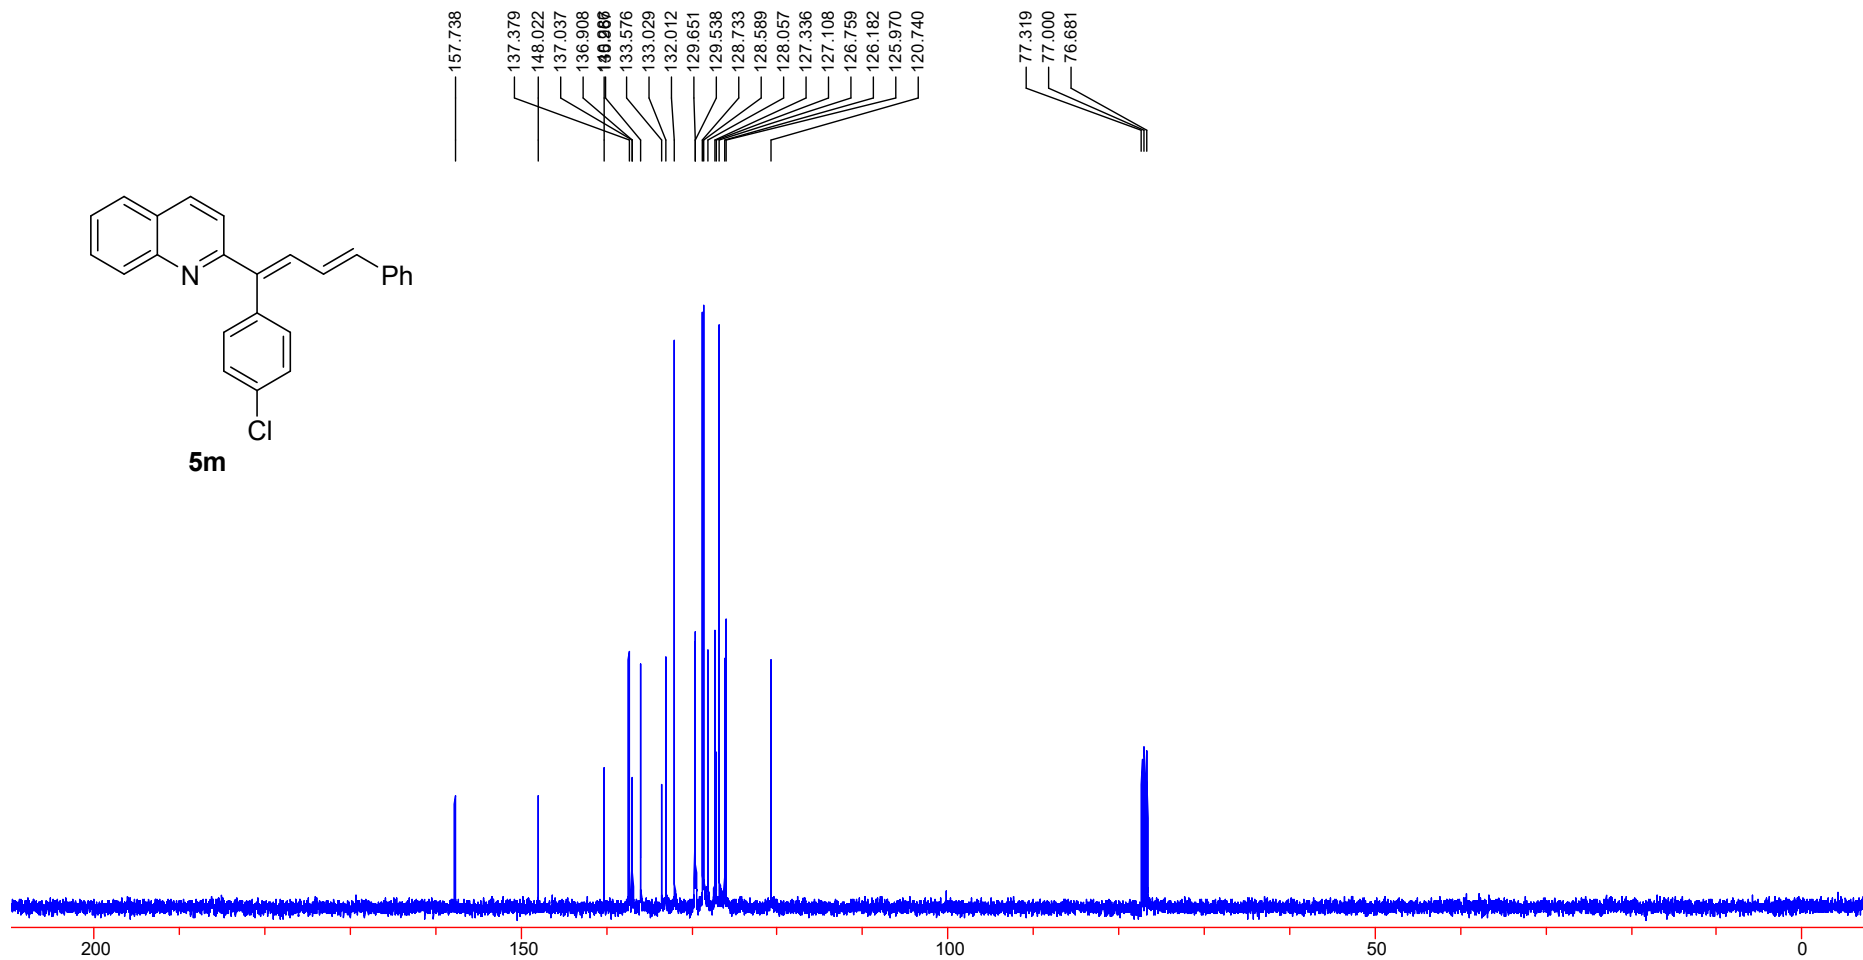

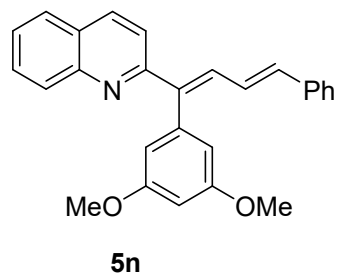

8.161  
 8.140  
 7.963  
 7.941  
 7.851  
 7.827  
 7.735  
 7.714  
 7.694  
 7.675  
 7.482  
 7.463  
 7.445  
 7.376  
 7.357  
 7.293  
 7.274  
 7.256  
 7.218  
 7.200  
 7.181  
 7.161  
 7.139  
 6.994  
 6.968  
 6.548  
 6.527

3.785

0.000

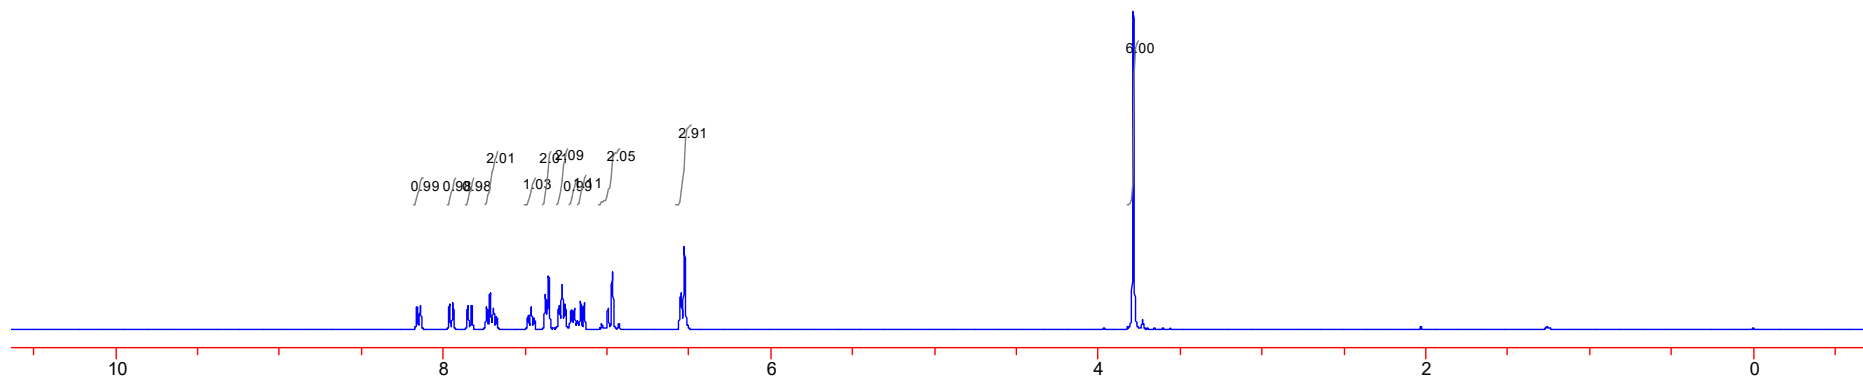

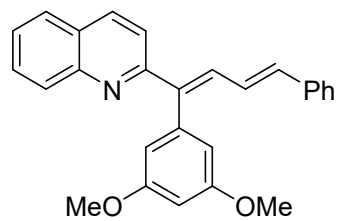

5n

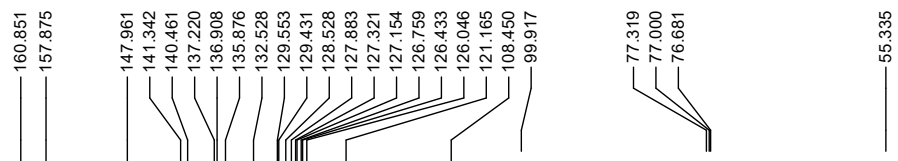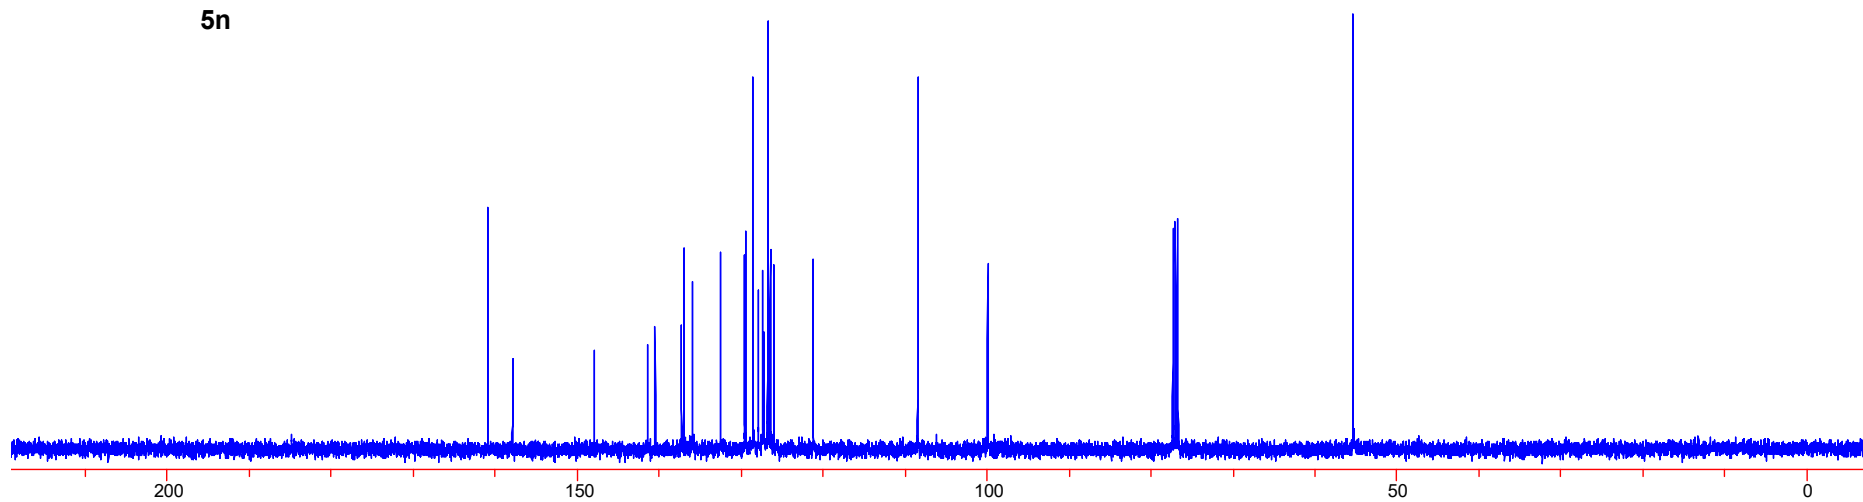

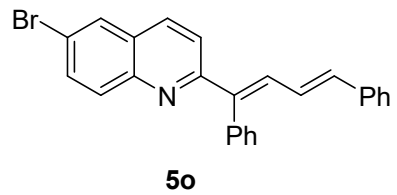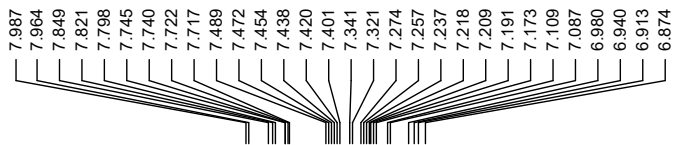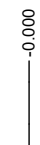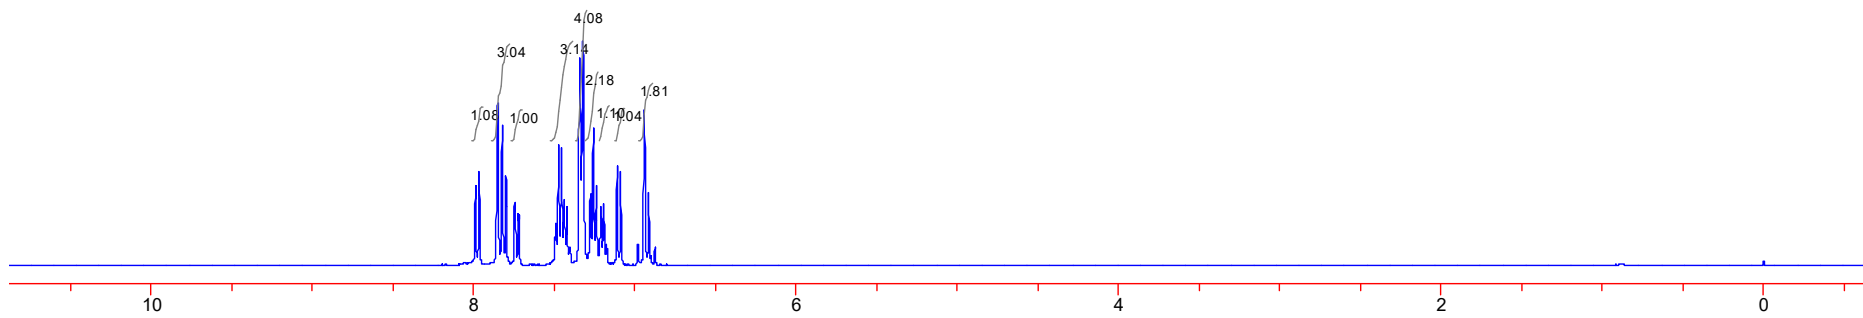

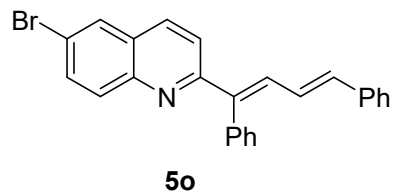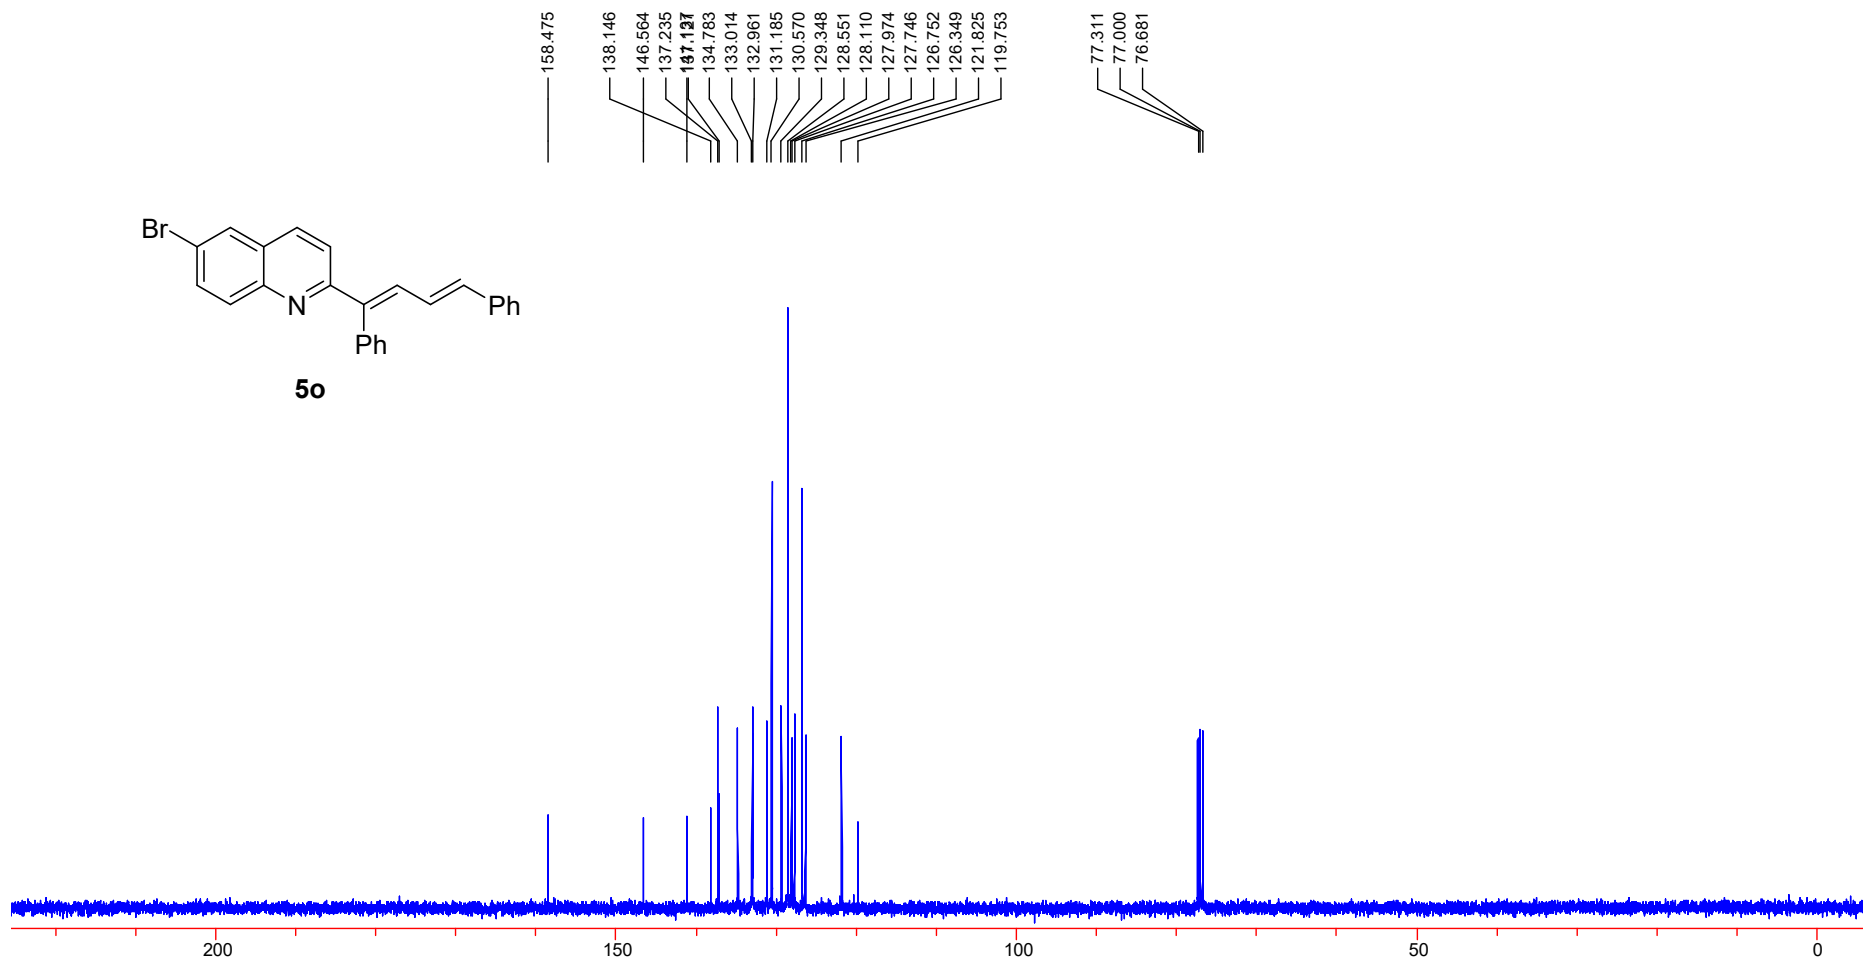

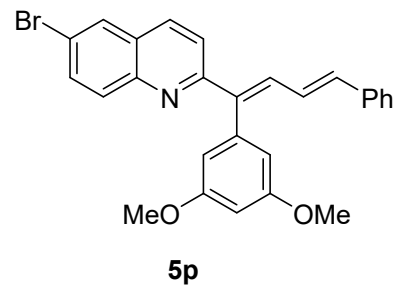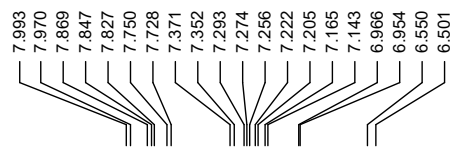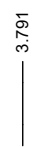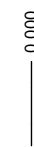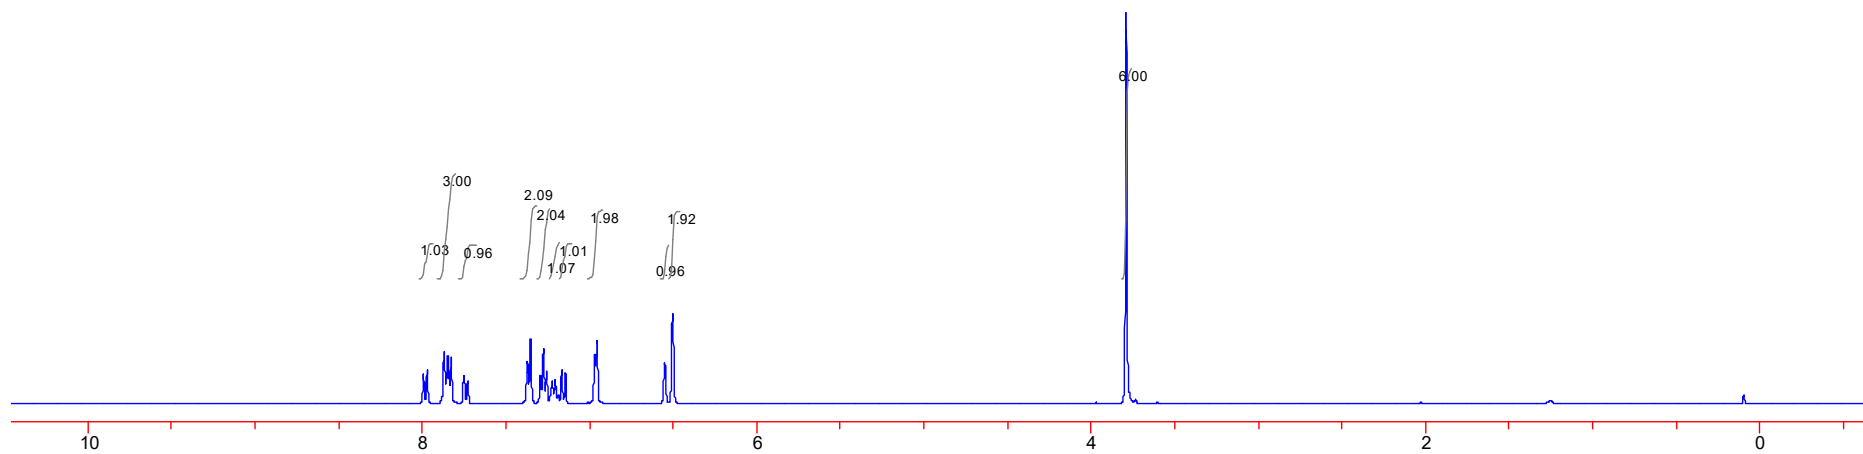

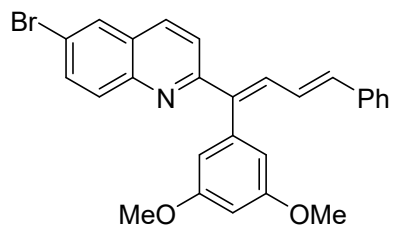

5p

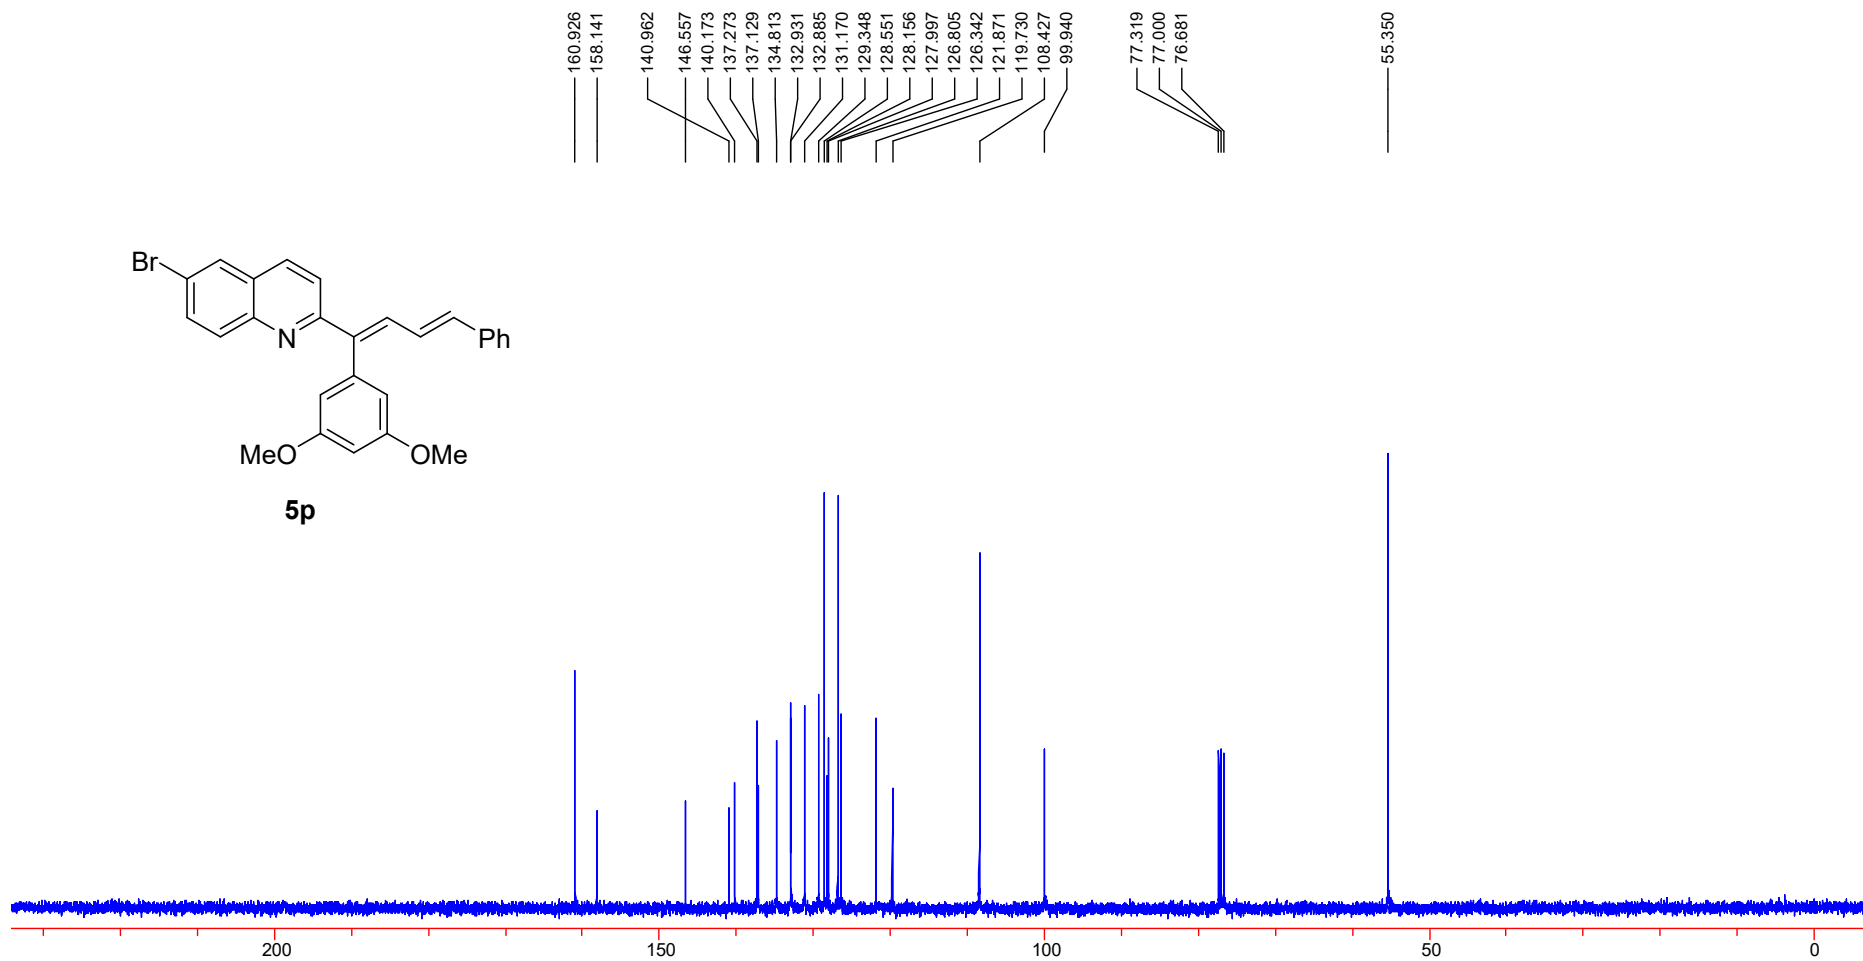

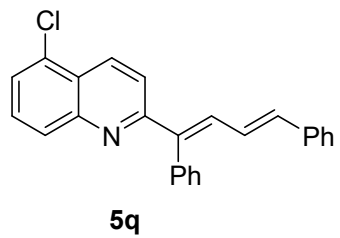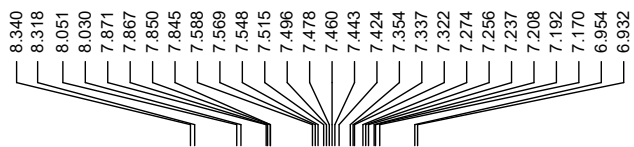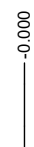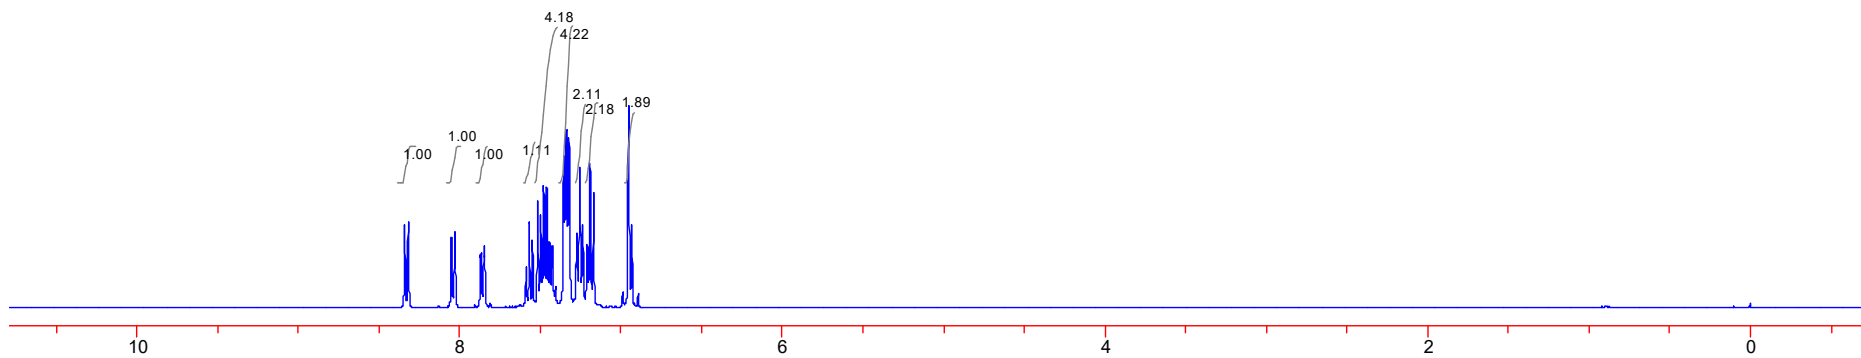



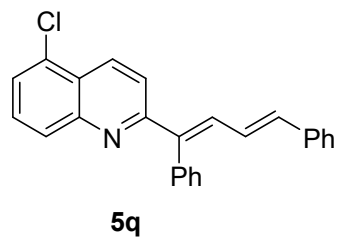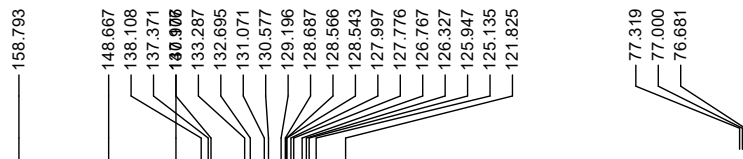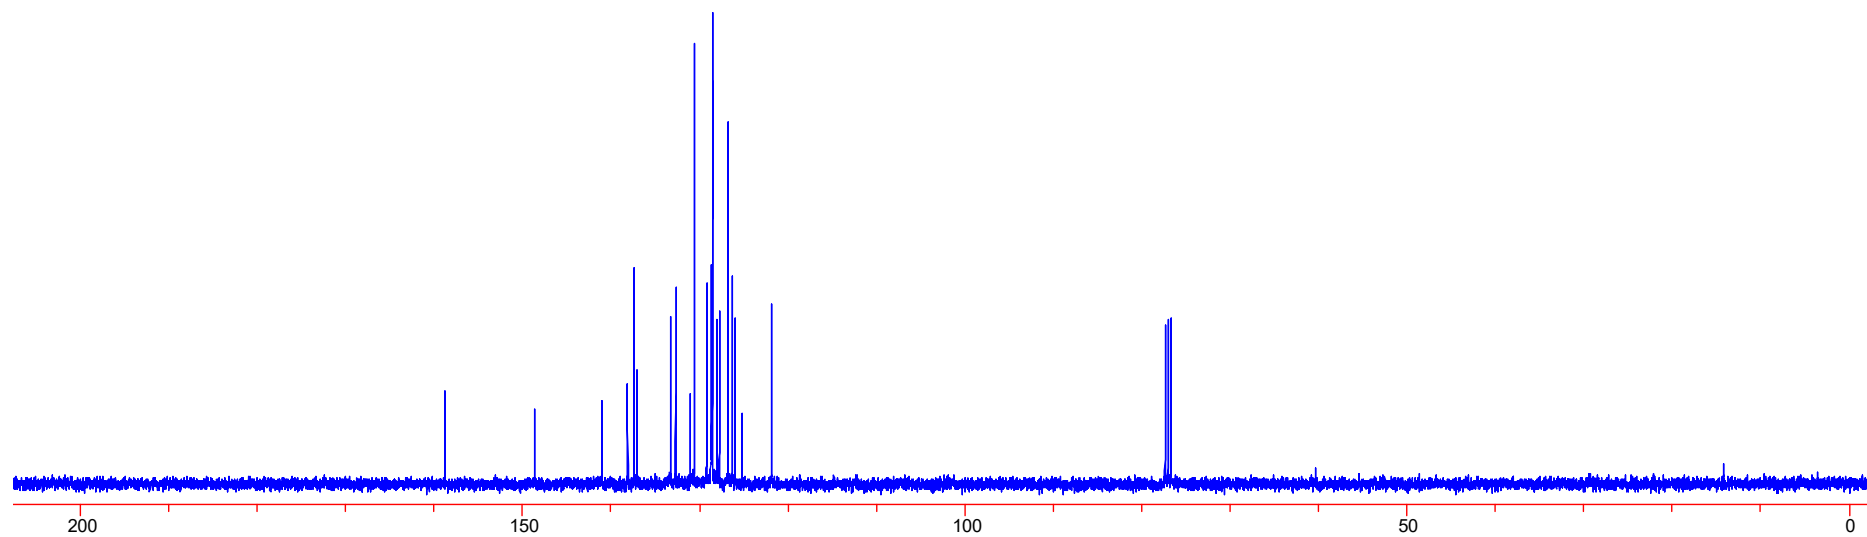

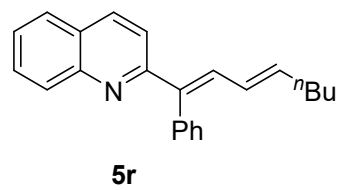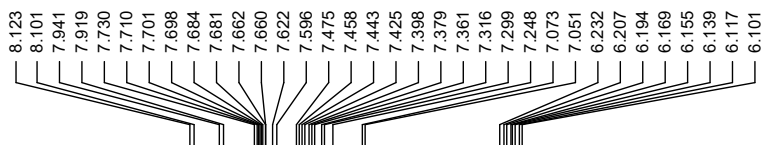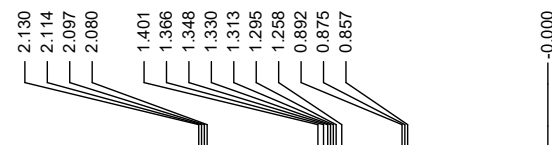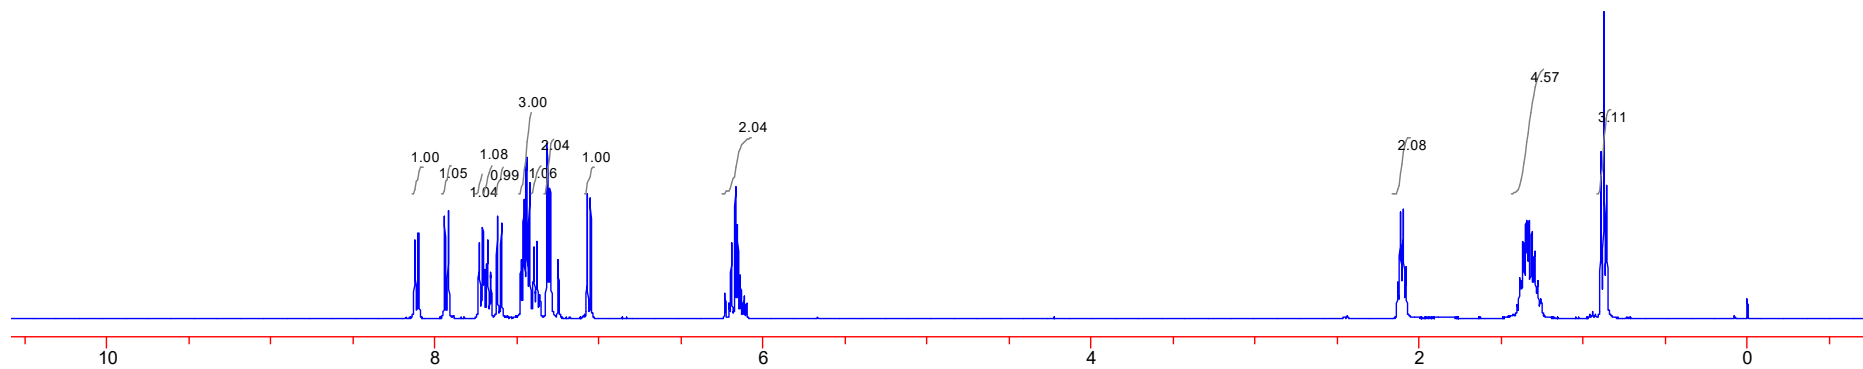

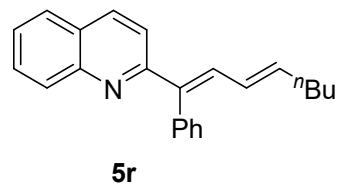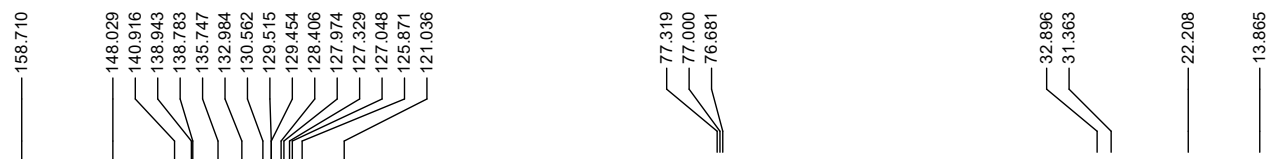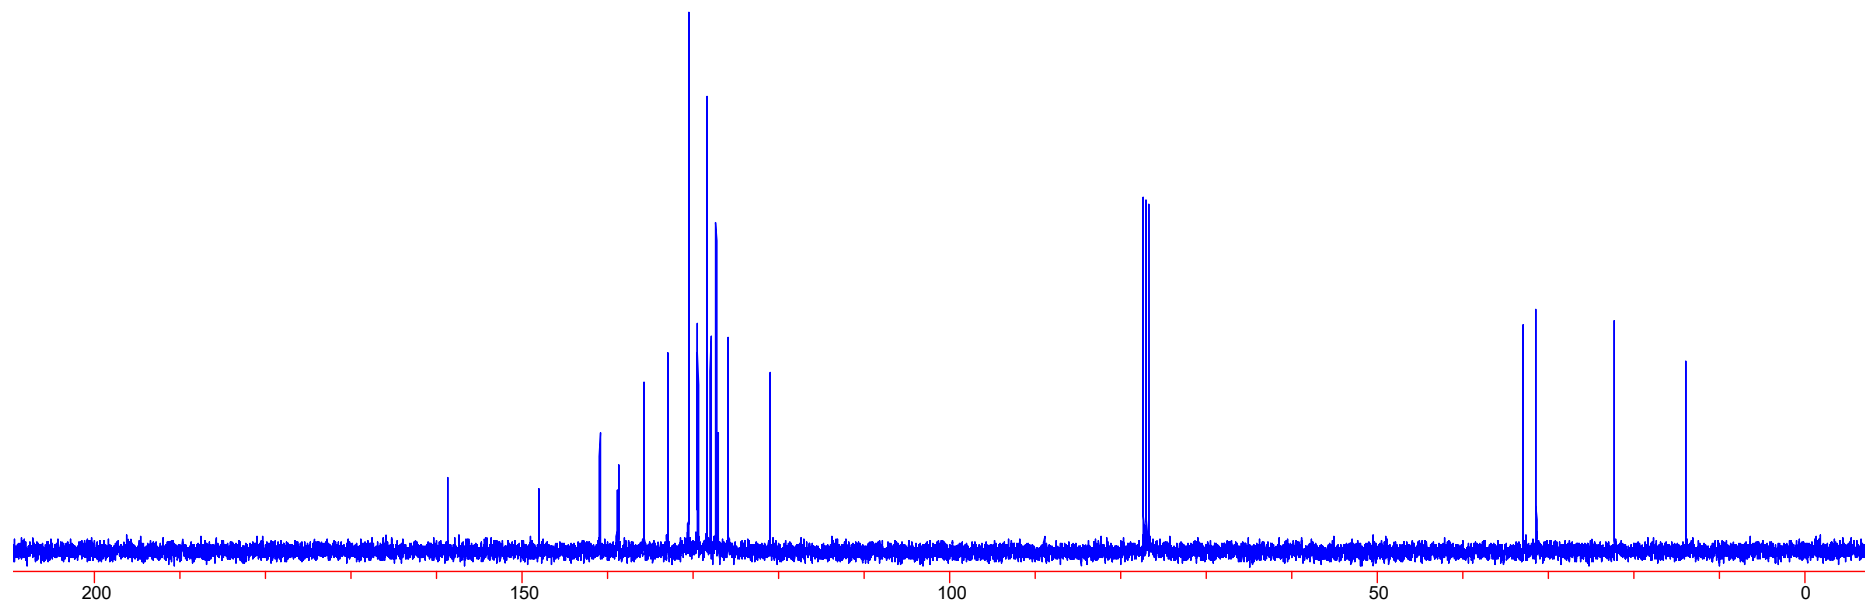

8.158  
8.137  
8.090  
8.068  
7.810  
7.789  
7.737  
7.733  
7.716  
7.698  
7.695  
7.545  
7.527  
7.509  
7.507  
7.423  
7.398  
7.385  
7.374  
7.367  
7.356  
7.345  
7.248  
6.110  
6.107  
5.772  
5.769

-0.000

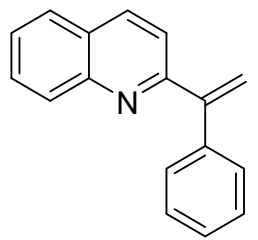

5u

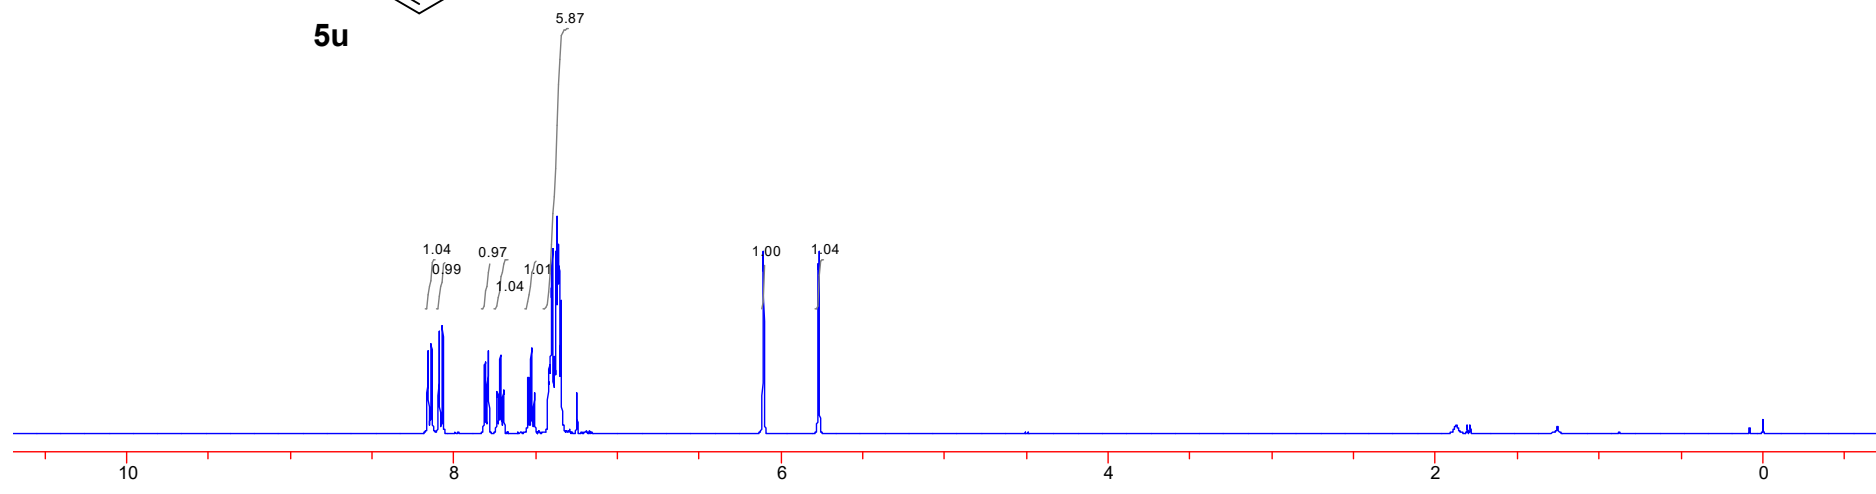

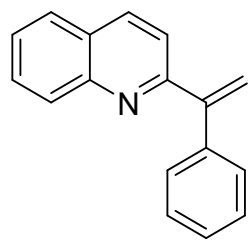

5u

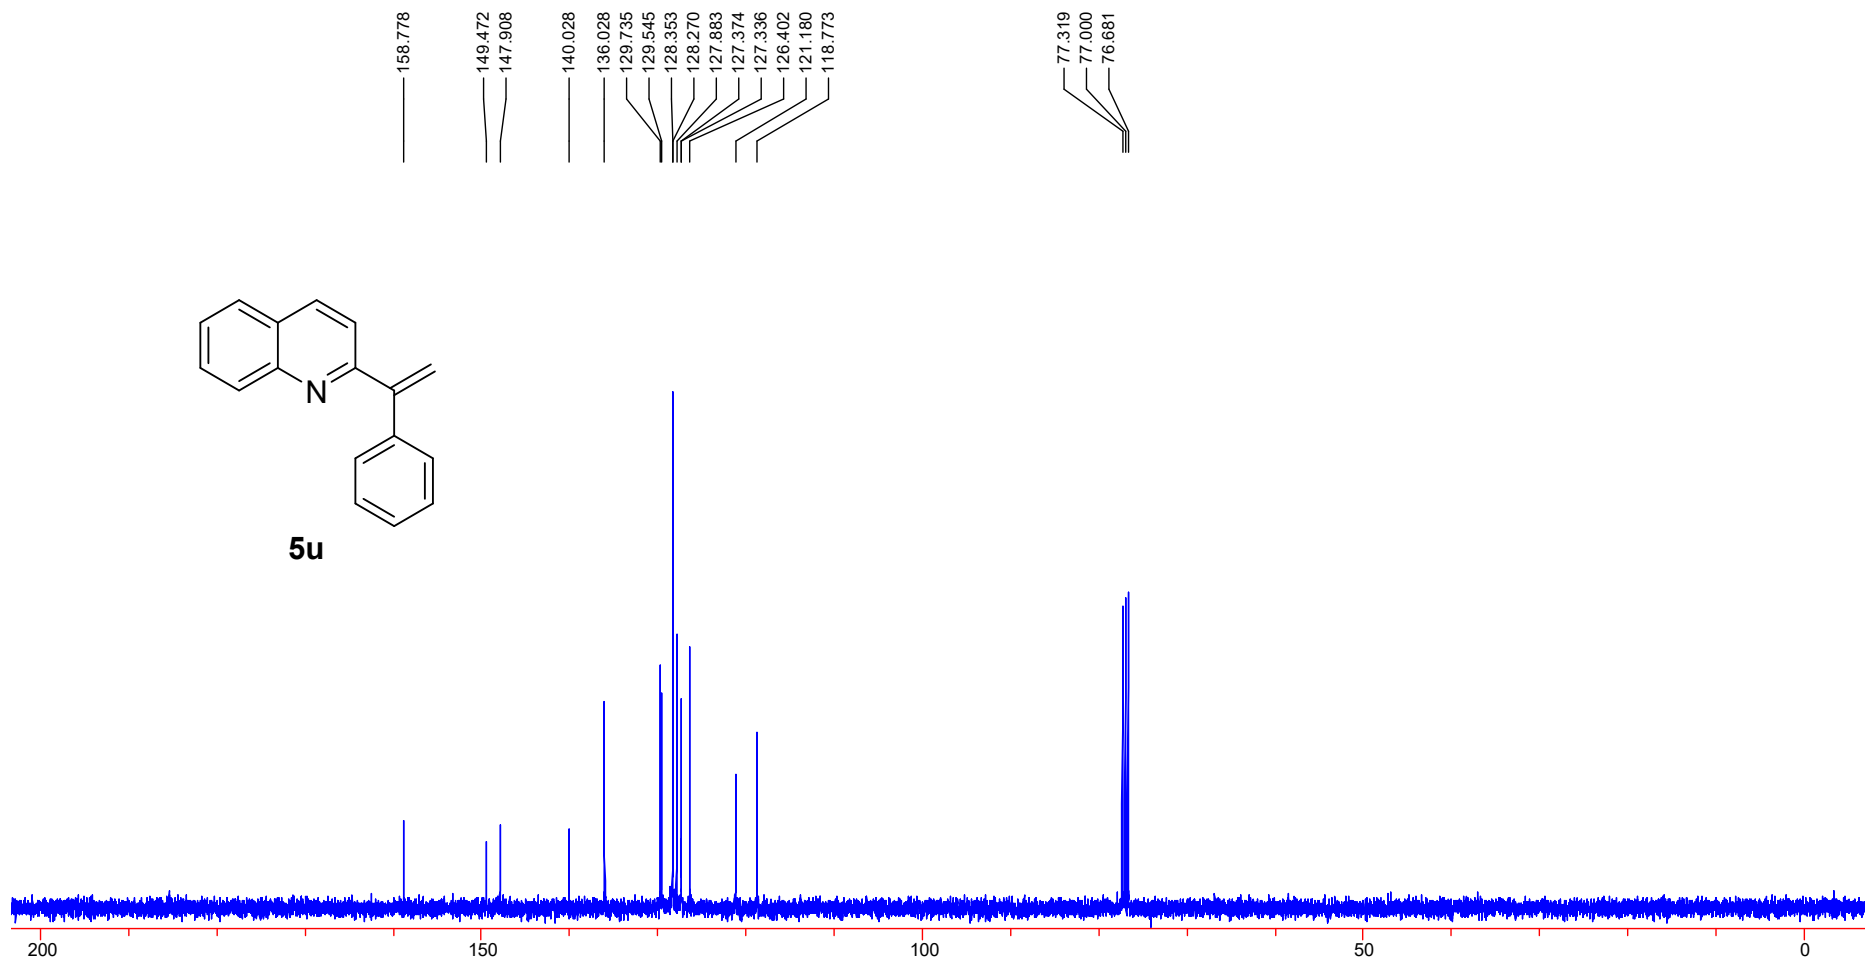

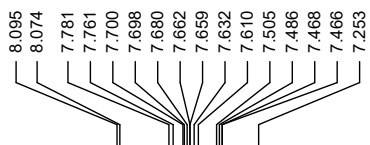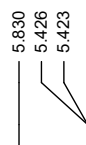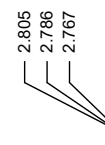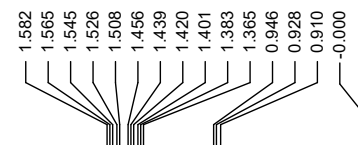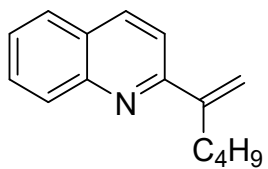

**5v**

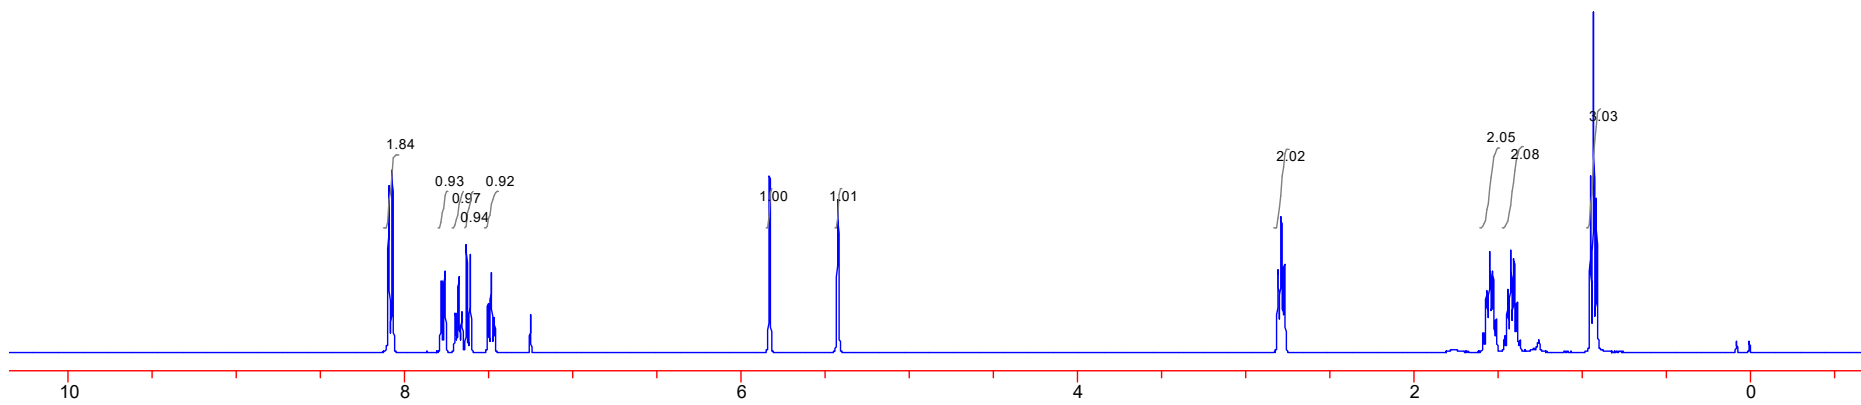

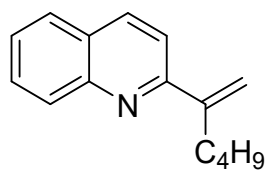

5v

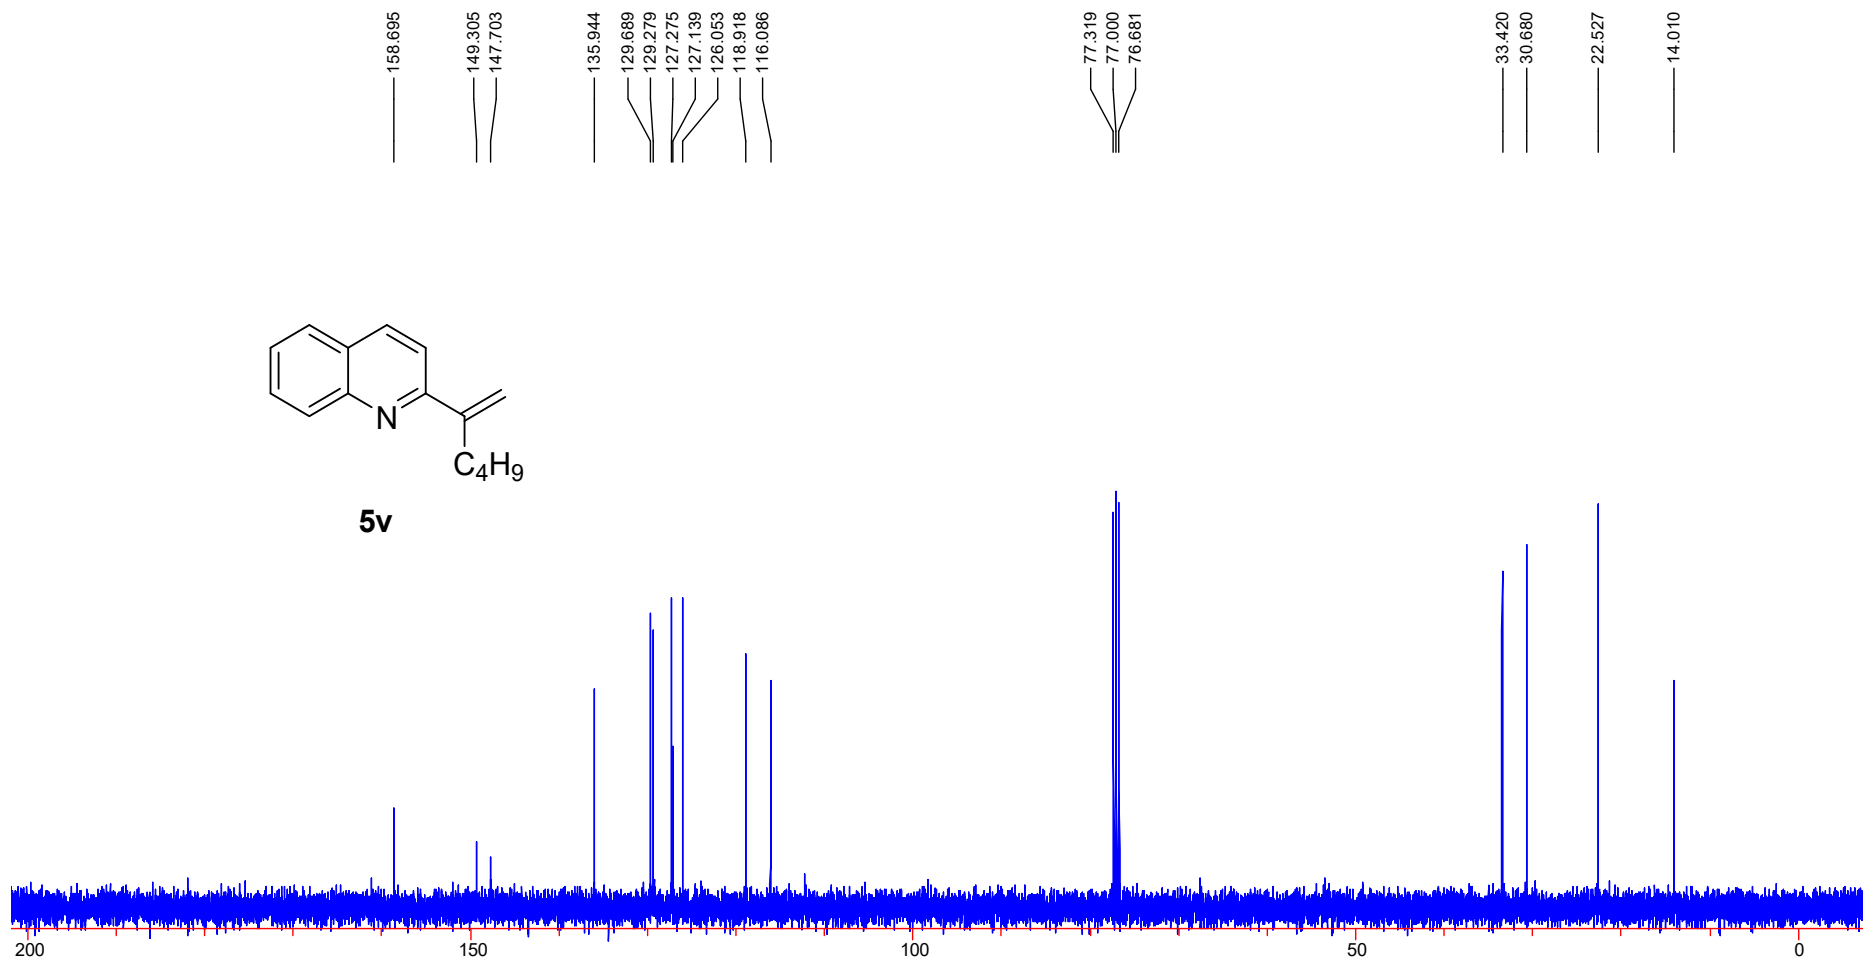

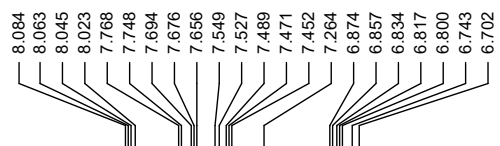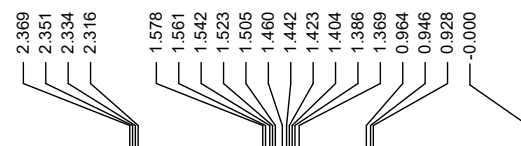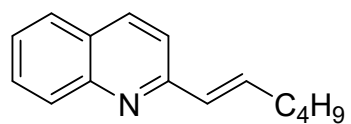

5v'

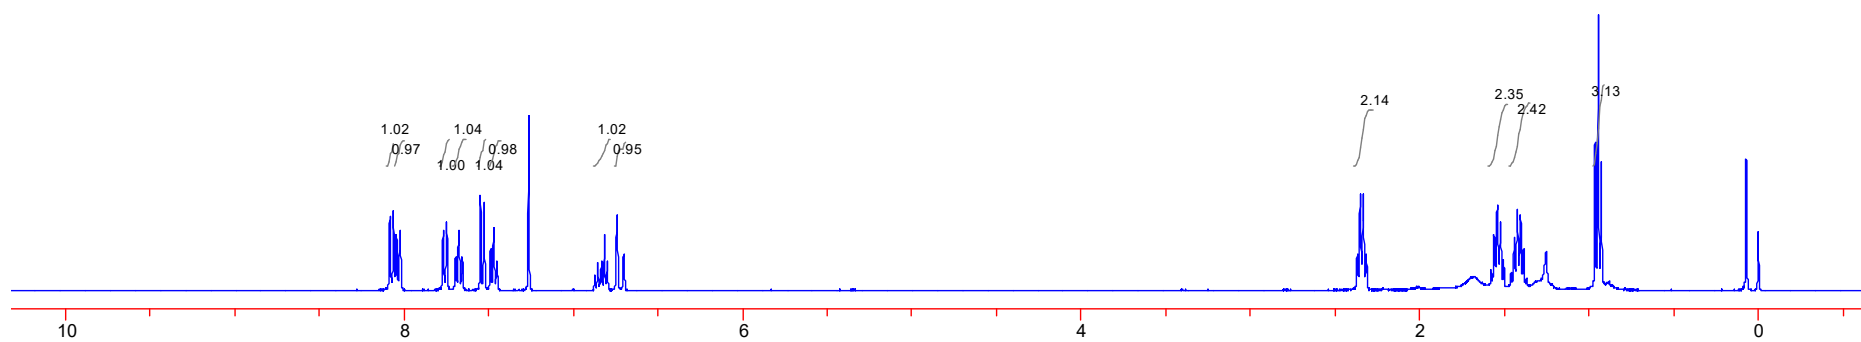



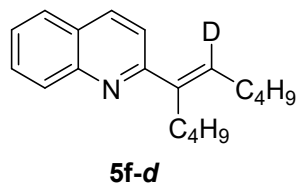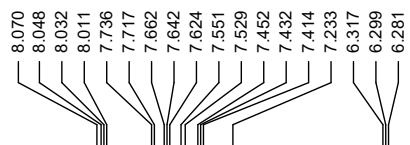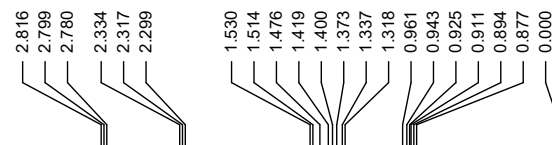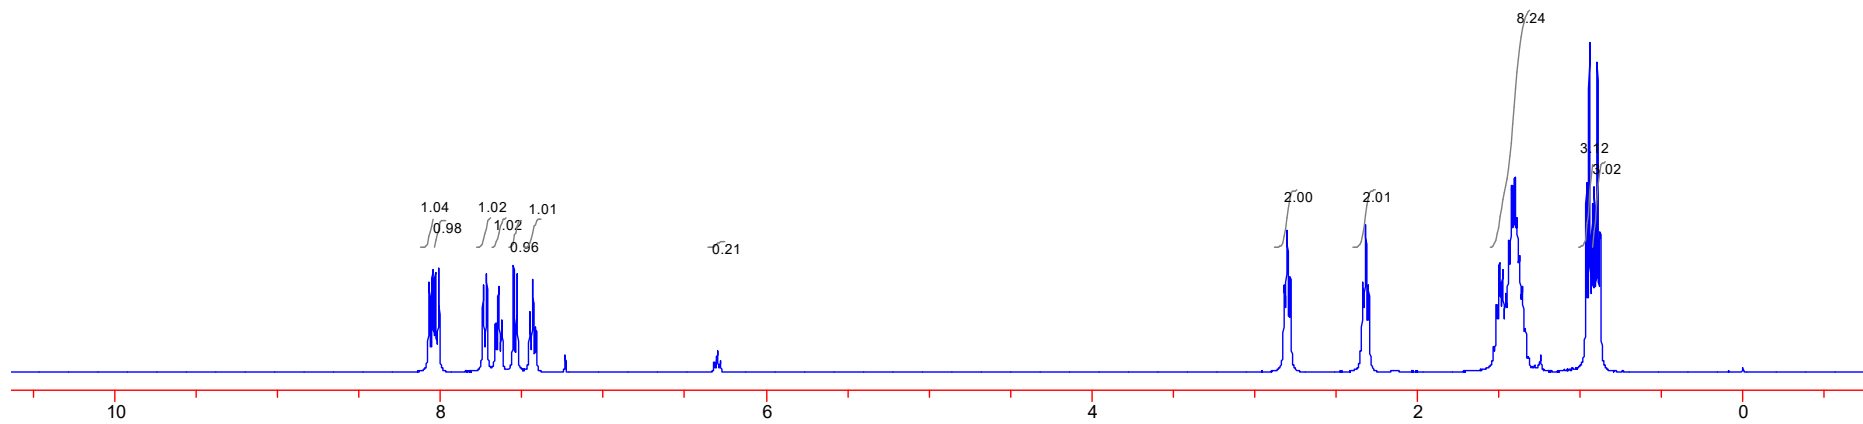

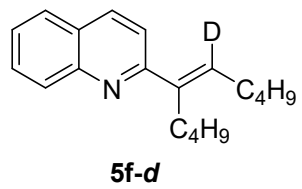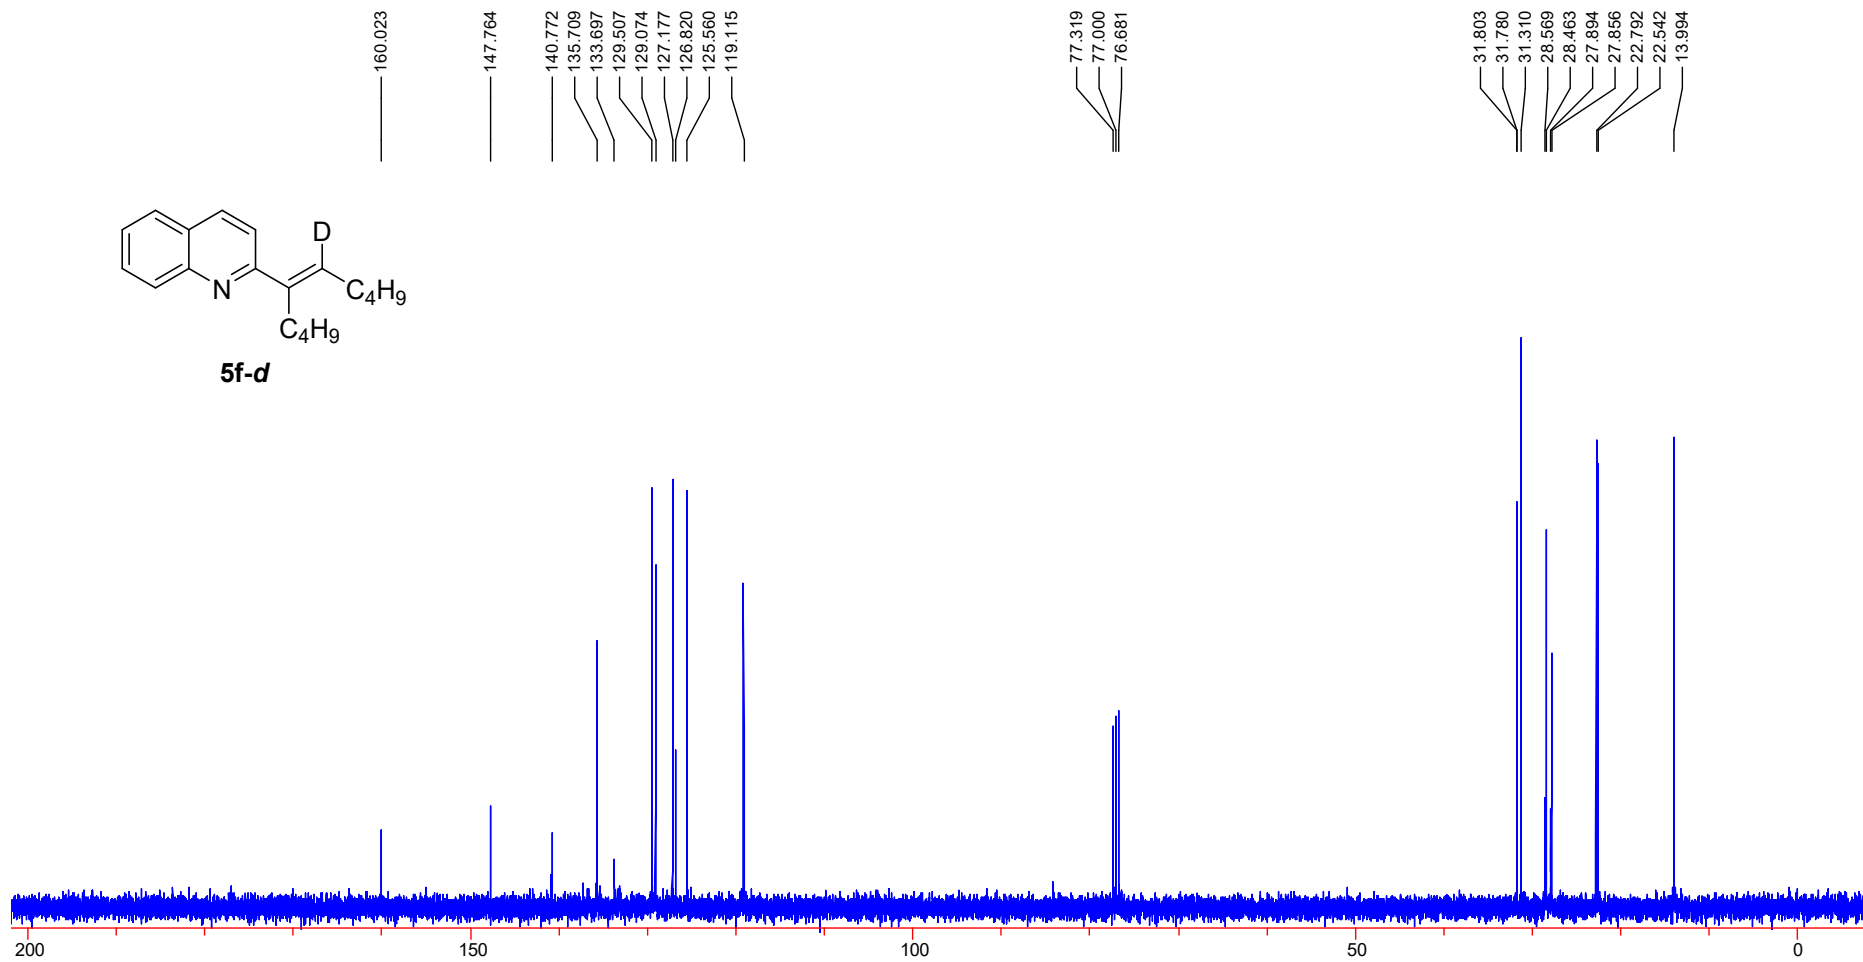

Supplement: d1qo01800k1.pdf [file d1qo01800k1.pdf]
